# Supplementary material
Source: PubMed Central journal article supplement (PMC3329801)
Supplement: NIHMS362347-supplement-Table_1_Mata.pdf [file NIHMS362347-supplement-Table_1_Mata.pdf]

Microarray Data

Cells + Compound 8.3 / Cells + DMSO @ 3h

| # id     | ratio | minus (1/ratio) |                                                                                                               |
|----------|-------|-----------------|---------------------------------------------------------------------------------------------------------------|
| ceacam6  | 12.59 | 12.587          | carcinoembryonic antigen-related cell adhesion molecule 6 (non-specific cross reacting antigen)(CEACAM6) mRNA |
| redd1    | 4.786 | 4.786           | regulated in development and DNA damage response 1, mRNA.                                                     |
| il8      | 2.729 | 2.7287          | interleukin 8 (IL8), mRNA.                                                                                    |
| cyp4f11  | 2.287 | 2.2874          | cytochrome P450, family 4, subfamily F, polypeptide 11 (CYP4F11), mRNA.                                       |
| scnn1a   | 2.106 | 2.1058          | sodium channel, nonvoltage-gated 1 alpha (SCNN1A), mRNA.                                                      |
| bhlhb2   | 2.048 | 2.0478          | basic helix-loop-helix domain containing, class B, 2 (BHLHB2), mRNA.                                          |
| fos      | 2.036 | 2.0363          | v-fos FBJ murine osteosarcoma viral oncogene homolog (FOS), mRNA.                                             |
| -----    |       |                 |                                                                                                               |
| #        |       |                 |                                                                                                               |
| znf45    | 0.5   | -2              | zinc finger protein 45 (ZNF45), mRNA.                                                                         |
| wdr58    | 0.5   | -2              | THO complex 6 homolog (Drosophila) (THOC6), mRNA.                                                             |
| dhrs3    | 0.5   | -2              | dehydrogenase/reductase (SDR family) member 3 (DHRS3), mRNA.                                                  |
| mgc14141 | 0.5   | -2              | transmembrane protein 141 (TMEM141), mRNA.                                                                    |
| bbx      | 0.5   | -2              | bobby sox homolog (Drosophila) (BBX), mRNA.                                                                   |
| zmynd8   | 0.5   | -2.001          | zinc finger, MYND-type containing 8 (ZMYND8), transcript variant 3, mRNA.                                     |
| fer1l4   | 0.5   | -2.001          | fer-1-like 4 (C. elegans) (FER1L4) on chromosome 20.                                                          |
| znf618   | 0.5   | -2.002          | zinc finger protein 618 (ZNF618), mRNA.                                                                       |
| morg1    | 0.5   | -2.002          | mitogen-activated protein kinase organizer 1 (MORG1), mRNA.                                                   |
| nup107   | 0.5   | -2.002          | nucleoporin 107kDa (NUP107), mRNA.                                                                            |
| epb49    | 0.5   | -2.002          | erythrocyte membrane protein band 4.9 (dematin) (EPB49), mRNA.                                                |
| prps1    | 0.5   | -2.002          | phosphoribosyl pyrophosphate synthetase 1 (PRPS1), mRNA.                                                      |
| chst13   | 0.5   | -2.002          | carbohydrate (chondroitin 4) sulfotransferase 13 (CHST13), mRNA.                                              |
| rims3    | 0.499 | -2.002          | regulating synaptic membrane exocytosis 3 (RIMS3), mRNA.                                                      |
| mrpl52   | 0.499 | -2.002          | mitochondrial ribosomal protein L52 (MRPL52)nuclear gene encoding mitochondrial protein, trans. variant 6mRNA |
| phka2    | 0.499 | -2.003          | phosphorylase kinase, alpha 2 (liver) (PHKA2), mRNA.                                                          |
| rnmt     | 0.499 | -2.003          | RNA (guanine-7-) methyltransferase (RNMT), mRNA.                                                              |
| kiaa0859 | 0.499 | -2.003          | KIAA0859 (KIAA0859), transcript variant 1, mRNA.                                                              |
| rc74     | 0.499 | -2.003          | integrator complex subunit 9 (INTS9), mRNA.                                                                   |
| slc25a5  | 0.499 | -2.003          | solute carrier family 25 (mitochondrial carrier; adenine nucleotide translocator), member 5 (SLC25A5), mRNA.  |
| gprasp2  | 0.499 | -2.003          | G protein-coupled receptor associated sorting protein 2 (GPRASP2), transcript variant 2, mRNA.                |
| mxd3     | 0.499 | -2.004          | MAX dimerization protein 3 (MXD3), mRNA.                                                                      |
| cradd    | 0.499 | -2.004          | CASP2 and RIPK1 domain containing adaptor with death domain (CRADD), mRNA.                                    |
| klhl21   | 0.499 | -2.004          | kelch-like 21 (Drosophila) (KLHL21), mRNA.                                                                    |
| rnf170   | 0.499 | -2.004          | ring finger protein 170 (RNF170), mRNA.                                                                       |
| atic     | 0.499 | -2.004          | 5-aminoimidazole-4-carboxamide ribonucleotide formyltransferase/IMP cyclohydrolase (ATIC), mRNA.              |
| camk1    | 0.499 | -2.005          | calcium/calmodulin-dependent protein kinase I (CAMK1), mRNA.                                                  |
| vgf      | 0.499 | -2.005          | VGF nerve growth factor inducible (VGF), mRNA.                                                                |
| txnrd1   | 0.499 | -2.005          | thioredoxin reductase 1 (TXNRD1), transcript variant 4, mRNA.                                                 |
| mical1   | 0.499 | -2.005          | microtubule associated monooxygenase, calponin and LIM domain containing 1 (MICAL1), mRNA.                    |
| golga4   | 0.499 | -2.005          | golgi autoantigen, golgin subfamily a, 4 (GOLGA4), mRNA.                                                      |

|           |       |                                                                                                                     |
|-----------|-------|---------------------------------------------------------------------------------------------------------------------|
| mgrn1     | 0.499 | -2.005 mahogunin, ring finger 1 (MGRN1), mRNA.                                                                      |
| loc644928 | 0.499 | -2.006 PREDICTED: similar to 40S ribosomal protein S26 (LOC644928), mRNA.                                           |
| commd5    | 0.499 | -2.006 COMM domain containing 5 (COMMD5), mRNA.                                                                     |
| scdr10    | 0.499 | -2.006 hydroxysteroid (11-beta) dehydrogenase 1-like (HSD11B1L), transcript variant e, mRNA.                        |
| flj14054  | 0.499 | -2.006 hypothetical protein FLJ14054 (FLJ14054), mRNA.                                                              |
| c9orf48   | 0.498 | -2.006 chromosome 9 open reading frame 48 (C9orf48), mRNA.                                                          |
| znrf3     | 0.498 | -2.006 PREDICTED: zinc and ring finger 3, transcript variant 5 (ZNRF3), mRNA.                                       |
| c15orf24  | 0.498 | -2.007 chromosome 15 open reading frame 24 (C15orf24), mRNA.                                                        |
| adam15    | 0.498 | -2.007 PREDICTED: ADAM metallopeptidase domain 15 (metargidin) (ADAM15), mRNA.                                      |
| znf142    | 0.498 | -2.007 zinc finger protein 142 (ZNF142), mRNA.                                                                      |
| smyd5     | 0.498 | -2.007 SMYD family member 5 (SMYD5), mRNA.                                                                          |
| fbxw4     | 0.498 | -2.008 F-box and WD repeat domain containing 4 (FBXW4), mRNA.                                                       |
| golt1a    | 0.498 | -2.008 golgi transport 1 homolog A ( <i>S. cerevisiae</i> ) (GOLT1A), mRNA.                                         |
| zcchc3    | 0.498 | -2.008 zinc finger, CCHC domain containing 3 (ZCCHC3), mRNA.                                                        |
| cln3      | 0.498 | -2.008 ceroid-lipofuscinosis, neuronal 3, juvenile (Batten, Spielmeier-Vogt disease) (CLN3), mRNA.                  |
| tubgcp2   | 0.498 | -2.008 tubulin, gamma complex associated protein 2 (TUBGCP2), mRNA.                                                 |
| golga5    | 0.498 | -2.008 golgi autoantigen, golgin subfamily a, 5 (GOLGA5), mRNA.                                                     |
| st3gal5   | 0.498 | -2.009 ST3 beta-galactoside alpha-2,3-sialyltransferase 5 (ST3GAL5), mRNA.                                          |
| nacap1    | 0.498 | -2.009 nascent-polypeptide-associated complex alpha polypeptide pseudogene 1 (NACAP1) on chromosome 8.              |
| znf585a   | 0.498 | -2.009 zinc finger protein 585A (ZNF585A), transcript variant 2, mRNA.                                              |
| thumpd3   | 0.498 | -2.009 THUMP domain containing 3 (THUMPD3), mRNA.                                                                   |
| man1b1    | 0.498 | -2.009 mannosidase, alpha, class 1B, member 1 (MAN1B1), mRNA.                                                       |
| dhcr24    | 0.498 | -2.009 24-dehydrocholesterol reductase (DHCR24), mRNA.                                                              |
| slc7a7    | 0.498 | -2.009 solute carrier family 7 (cationic amino acid transporter, y+ system), member 7 (SLC7A7), mRNA.               |
| ndufb7    | 0.498 | -2.01 NADH dehydrogenase(ubiquinone)1b subcomplex, 7, 18kDa (NDUFB7), nucl. gene encoding mitochon. protein, mRNA   |
| pacs2     | 0.498 | -2.01 phosphofurin acidic cluster sorting protein 2 (PACS2), mRNA.                                                  |
| ccne1     | 0.498 | -2.01 cyclin E1 (CCNE1), transcript variant 1, mRNA.                                                                |
| sema3b    | 0.498 | -2.01 sema domain, (Ig) domain, short basic domain, secreted, (semaphorin) 3B (SEMA3B), trans.variant 2, mRNA.      |
| cklf      | 0.498 | -2.01 chemokine-like factor (CKLF), transcript variant 6, mRNA.                                                     |
| pkd1      | 0.497 | -2.01 polycystic kidney disease 1 (autosomal dominant) (PKD1), transcript variant 1, mRNA.                          |
| lsm3      | 0.497 | -2.01 LSM3 homolog, U6 small nuclear RNA associated ( <i>S. cerevisiae</i> ) (LSM3), mRNA.                          |
| loc642209 | 0.497 | -2.012 PREDICTED: similar to ribosomal protein L13a, transcript variant 1 (LOC642209), mRNA.                        |
| nkrf      | 0.497 | -2.012 NF-kappaB repressing factor (NKRF), mRNA.                                                                    |
| atp1a1    | 0.497 | -2.012 ATPase, Na+/K+ transporting, alpha 1 polypeptide (ATP1A1), transcript variant 1, mRNA.                       |
| nsfl1c    | 0.497 | -2.012 NSFL1 (p97) cofactor (p47) (NSFL1C), transcript variant 3, mRNA.                                             |
| hs.561357 | 0.497 | -2.012 UI-H-ED0-axn-h-17-0-UI.s1 NCI_CGAP_ED0 cDNA clone UI-H-ED0-axn-h-17-0-UI 3, mRNA sequence                    |
| loc116143 | 0.497 | -2.012 hypothetical protein BC014022 (LOC116143), mRNA.                                                             |
| wdfy1     | 0.497 | -2.012 WD repeat and FYVE domain containing 1 (WDFY1), mRNA.                                                        |
| loc388642 | 0.497 | -2.012 PREDIC:similar to Triosephosphate isomerase(TIM)(Triose-phosphate isomerase),trans. variant 3(LOC388642)mRNA |
| loc652826 | 0.497 | -2.012 PREDIC:similar to 26S protease regulatory subunit 6B(MIP224)(MB67-interacting protein)(LOC652826)mRNA.       |
| tmem11    | 0.497 | -2.013 transmembrane protein 11 (TMEM11), mRNA.                                                                     |
| luzp1     | 0.497 | -2.013 leucine zipper protein 1 (LUZP1), mRNA.                                                                      |

|           |       |                                                                                                                                                                                |
|-----------|-------|--------------------------------------------------------------------------------------------------------------------------------------------------------------------------------|
| tbc1d2b   | 0.497 | -2.014 TBC1 domain family, member 2B (TBC1D2B), mRNA.                                                                                                                          |
| dgcr14    | 0.497 | -2.014 DiGeorge syndrome critical region gene 14 (DGCR14), mRNA.                                                                                                               |
| rsu1      | 0.497 | -2.014 Ras suppressor protein 1 (RSU1), transcript variant 2, mRNA.                                                                                                            |
| vrk1      | 0.497 | -2.014 vaccinia related kinase 1 (VRK1), mRNA.                                                                                                                                 |
| mrpl42    | 0.497 | -2.014 mitochondrial ribosomal protein L42 (MRPL42), nuclear gene encoding mitochon. protein, trans.variant 2, mRNA.                                                           |
| c14orf156 | 0.497 | -2.014 chromosome 14 open reading frame 156 (C14orf156), mRNA.                                                                                                                 |
| ube3a     | 0.496 | -2.015 ubiquitin protein ligaseE3A(human papilloma virus E6-assoc.protein,Angelman synd.)(UBE3A)trans.variant3mRNA                                                             |
| mgc52110  | 0.496 | -2.015 hypothetical protein MGC52110 (MGC52110), mRNA.                                                                                                                         |
| hs.572219 | 0.496 | -2.015 CM3-MT0357-260101-690-b10 MT0357 cDNA, mRNA sequence                                                                                                                    |
| loc645489 | 0.496 | -2.015 PREDICTED: hypothetical protein LOC645489 (LOC645489), mRNA.                                                                                                            |
| bub1b     | 0.496 | -2.015 BUB1 budding uninhibited by benzimidazoles 1 homolog beta (yeast) (BUB1B), mRNA.                                                                                        |
| slc25a15  | 0.496 | -2.015 solute carrier family 25(mitochon.carrier; ornithine transporter)member 15,nucl.gene encode mitochon.protein,mRN                                                        |
| tsen2     | 0.496 | -2.015 tRNA splicing endonuclease 2 homolog (S. cerevisiae) (TSEN2), mRNA.                                                                                                     |
| anp32b    | 0.496 | -2.015 acidic (leucine-rich) nuclear phosphoprotein 32 family, member B (ANP32B), mRNA.                                                                                        |
| nbl1      | 0.496 | -2.016 neuroblastoma, suppression of tumorigenicity 1 (NBL1), transcript variant 2, mRNA.                                                                                      |
| ppp6c     | 0.496 | -2.016 protein phosphatase 6, catalytic subunit (PPP6C), mRNA.                                                                                                                 |
| ddx39     | 0.496 | -2.016 DEAD (Asp-Glu-Ala-Asp) box polypeptide 39 (DDX39), transcript variant 2, mRNA.                                                                                          |
| mrps11    | 0.496 | -2.016 mitochondrial ribosomal protein S11(MRPS11)nuclear gene encoding mitochondrial protein, trans.variant 2,mRNA                                                            |
| ercc1     | 0.496 | -2.017 excision repair cross-complementing rodent repair deficiency, complementation group 1<br>(includes overlapping antisense sequence) (ERCC1), transcript variant 1, mRNA. |
| c9orf116  | 0.496 | -2.017 chromosome 9 open reading frame 116 (C9orf116), mRNA.                                                                                                                   |
| slc25a1   | 0.496 | -2.017 solute carrier family 25 (mitochondrial carrier; citrate transporter), member 1 (SLC25A1), mRNA.                                                                        |
| gpr125    | 0.496 | -2.017 PREDICTED: G protein-coupled receptor 125, transcript variant 5 (GPR125), mRNA.                                                                                         |
| cdca2     | 0.496 | -2.017 cell division cycle associated 2 (CDCA2), mRNA.                                                                                                                         |
| thrap3    | 0.496 | -2.017 thyroid hormone receptor associated protein 3 (THRAP3), mRNA.                                                                                                           |
| ipo4      | 0.496 | -2.017 importin 4 (IPO4), mRNA.                                                                                                                                                |
| loc653726 | 0.496 | -2.018 PREDICTED: similar to family with sequence similarity 86, member B1 (LOC653726), mRNA.                                                                                  |
| loc388532 | 0.496 | -2.018 PREDICTED: similar to ribosomal protein L21 isoform 1 (LOC388532), mRNA.                                                                                                |
| ttf1      | 0.496 | -2.018 transcription termination factor, RNA polymerase I (TTF1), mRNA.                                                                                                        |
| scrib     | 0.496 | -2.018 scribbled homolog (Drosophila) (SCRIB), transcript variant 1, mRNA.                                                                                                     |
| mgc2654   | 0.496 | -2.018 LP8272 (MGC2654), mRNA.                                                                                                                                                 |
| zswim1    | 0.496 | -2.018 zinc finger, SWIM-type containing 1 (ZSWIM1), mRNA.                                                                                                                     |
| cpne3     | 0.496 | -2.018 copine III (CPNE3), mRNA.                                                                                                                                               |
| orc1l     | 0.495 | -2.018 origin recognition complex, subunit 1-like (yeast) (ORC1L), mRNA.                                                                                                       |
| 7-Mar     | 0.495 | -2.018 membrane-associated ring finger (C3HC4) 7 (MARCH7), mRNA.                                                                                                               |
| flj12529  | 0.495 | -2.019 pre-mRNA cleavage factor I, 59 kDa subunit (FLJ12529), mRNA.                                                                                                            |
| mrpl21    | 0.495 | -2.019 mitochondrial ribosomal protein L21(MRPL21),nuclear gene encoding mitochondrial protein, trans.variant 3,mRNA                                                           |
| mad2l2    | 0.495 | -2.019 MAD2 mitotic arrest deficient-like 2 (yeast) (MAD2L2), mRNA.                                                                                                            |
| pttg1ip   | 0.495 | -2.019 pituitary tumor-transforming 1 interacting protein (PTTG1IP), mRNA.                                                                                                     |
| c9orf125  | 0.495 | -2.019 chromosome 9 open reading frame 125 (C9orf125), mRNA.                                                                                                                   |
| gpr64     | 0.495 | -2.019 G protein-coupled receptor 64 (GPR64), mRNA.                                                                                                                            |
| smpdl3a   | 0.495 | -2.019 sphingomyelin phosphodiesterase, acid-like 3A (SMPDL3A), mRNA.                                                                                                          |

|           |       |        |                                                                                                                                  |
|-----------|-------|--------|----------------------------------------------------------------------------------------------------------------------------------|
| c8orf53   | 0.495 | -2.019 | chromosome 8 open reading frame 53 (C8orf53), mRNA.                                                                              |
| tmem32    | 0.495 | -2.019 | transmembrane protein 32 (TMEM32), mRNA.                                                                                         |
| pafah1b3  | 0.495 | -2.019 | platelet-activating factor acetylhydrolase, isoform Ib, gamma subunit 29kDa (PAFAH1B3), mRNA.                                    |
| znf146    | 0.495 | -2.02  | zinc finger protein 146 (ZNF146), mRNA.                                                                                          |
| tapbp     | 0.495 | -2.02  | TAP binding protein (tapasin) (TAPBP), transcript variant 3, mRNA.                                                               |
| cgi-115   | 0.495 | -2.02  | CGI-115 protein (CGI-115), mRNA.                                                                                                 |
| loc647099 | 0.495 | -2.02  | PREDICTED: similar to 60S ribosomal protein L23a (LOC647099), mRNA.                                                              |
| ankrd25   | 0.495 | -2.02  | ankyrin repeat domain 25 (ANKRD25), mRNA.                                                                                        |
| dkc1      | 0.495 | -2.02  | dyskeratosis congenita 1, dyskerin (DKC1), mRNA.                                                                                 |
| cope      | 0.495 | -2.02  | coatamer protein complex, subunit epsilon (COPE), transcript variant 3, mRNA.                                                    |
| snrpb2    | 0.495 | -2.02  | small nuclear ribonucleoprotein polypeptide B'' (SNRPB2), transcript variant 1, mRNA.                                            |
| chchd4    | 0.495 | -2.02  | coiled-coil-helix-coiled-coil-helix domain containing 4 (CHCHD4), mRNA.                                                          |
| hyou1     | 0.495 | -2.021 | hypoxia up-regulated 1 (HYOU1), mRNA.                                                                                            |
| abcb7     | 0.495 | -2.021 | ATP-binding cassette, sub-family B(MDR/TAP),member7(ABCB7),nuclr. gene encoding mitochon. protein,mRNA                           |
| mrpl49    | 0.495 | -2.021 | mitochondrial ribosomal protein L49 (MRPL49), nuclear gene encoding mitochondrial protein, mRNA.                                 |
| hs.370359 | 0.495 | -2.021 | mRNA; cDNA DKFZp686F09166 (from clone DKFZp686F09166)                                                                            |
| arnt2     | 0.495 | -2.021 | aryl-hydrocarbon receptor nuclear translocator 2 (ARNT2), mRNA.                                                                  |
| hs.126768 | 0.495 | -2.022 | full-length cDNA clone CSODI004YB08 of Placenta Cot 25-normalized of (human)                                                     |
| c16orf24  | 0.495 | -2.022 | chromosome 16 open reading frame 24 (C16orf24), mRNA.                                                                            |
| extl3     | 0.495 | -2.022 | exostoses (multiple)-like 3 (EXTL3), mRNA.                                                                                       |
| c18orf8   | 0.495 | -2.022 | chromosome 18 open reading frame 8 (C18orf8), mRNA.                                                                              |
| phf5a     | 0.494 | -2.023 | PHD finger protein 5A (PHF5A), mRNA.                                                                                             |
| papss1    | 0.494 | -2.023 | 3'-phosphoadenosine 5'-phosphosulfate synthase 1 (PAPSS1), mRNA.                                                                 |
| ptpn13    | 0.494 | -2.023 | protein tyrosine phosphatase,non-receptor type 13 (APO-1/CD95(Fas)-associated phosphatase) (PTPN13), transcript variant 3, mRNA. |
| pcmt1     | 0.494 | -2.023 | protein-L-isoaspartate (D-aspartate) O-methyltransferase (PCMT1), mRNA.                                                          |
| dirc2     | 0.494 | -2.023 | disrupted in renal carcinoma 2 (DIRC2), mRNA.                                                                                    |
| tagln2    | 0.494 | -2.023 | transgelin 2 (TAGLN2), mRNA.                                                                                                     |
| myh9      | 0.494 | -2.023 | myosin, heavy polypeptide 9, non-muscle (MYH9), mRNA.                                                                            |
| hexb      | 0.494 | -2.023 | hexosaminidase B (beta polypeptide) (HEXB), mRNA.                                                                                |
| ppat      | 0.494 | -2.024 | phosphoribosyl pyrophosphate amidotransferase (PPAT), mRNA.                                                                      |
| cryz      | 0.494 | -2.024 | crystallin, zeta (quinone reductase) (CRYZ), mRNA.                                                                               |
| mgc13170  | 0.494 | -2.024 | chromosome 19 open reading frame 48 (C19orf48), mRNA.                                                                            |
| nov       | 0.494 | -2.024 | nephroblastoma overexpressed gene (NOV), mRNA.                                                                                   |
| exosc5    | 0.494 | -2.024 | exosome component 5 (EXOSC5), mRNA.                                                                                              |
| raly      | 0.494 | -2.024 | RNA binding protein, autoantigenic (hnRNP-associated with lethal yellow homolog (mouse)) (RALY), transcript variant 1, mRNA.     |
| rab4a     | 0.494 | -2.024 | RAB4A, member RAS oncogene family (RAB4A), mRNA.                                                                                 |
| pif1      | 0.494 | -2.025 | PIF1 5'-to-3' DNA helicase homolog (S. cerevisiae) (PIF1), mRNA.                                                                 |
| loc285989 | 0.494 | -2.025 | zinc finger protein 789 (ZNF789), transcript variant 2, mRNA.                                                                    |
| znf446    | 0.494 | -2.025 | zinc finger protein 446 (ZNF446), mRNA.                                                                                          |
| myo1b     | 0.494 | -2.025 | myosin IB (MYO1B), mRNA.                                                                                                         |

|           |       |        |                                                                                                               |
|-----------|-------|--------|---------------------------------------------------------------------------------------------------------------|
| mrpl36    | 0.494 | -2.025 | mitochondrial ribosomal protein L36 (MRPL36), nuclear gene encoding mitochondrial protein, mRNA.              |
| cnot2     | 0.494 | -2.025 | CCR4-NOT transcription complex, subunit 2 (CNOT2), mRNA.                                                      |
| lepre1    | 0.494 | -2.026 | leucine proline-enriched proteoglycan (leprecan) 1 (LEPRE1), mRNA.                                            |
| hs.568777 | 0.494 | -2.026 | AGENCOURT_8210259 NIH_MGC_112 cDNA clone IMAGE:6258046 5, mRNA sequence                                       |
| timeless  | 0.494 | -2.026 | timeless homolog (Drosophila) (TIMELESS), mRNA.                                                               |
| sumo1p3   | 0.494 | -2.026 | SUMO1 pseudogene 3 (SUMO1P3) on chromosome 1.                                                                 |
| skiv2l    | 0.493 | -2.027 | superkiller viralicidic activity 2-like ( <i>S. cerevisiae</i> ) (SKIV2L), mRNA.                              |
| loc285193 | 0.493 | -2.027 | dual specificity phosphatase 28 (DUSP28), mRNA.                                                               |
| c9orf111  | 0.493 | -2.027 | patatin-like phospholipase domain containing 7 (PNPLA7), mRNA.                                                |
| tfip11    | 0.493 | -2.027 | tuftelin interacting protein 11 (TFIP11), transcript variant 1, mRNA.                                         |
| flj12681  | 0.493 | -2.027 | hypothetical protein FLJ12681 (FLJ12681), mRNA.                                                               |
| loc643367 | 0.493 | -2.028 | PREDICTED: region containing SMA4; hypothetical protein LOC153561, transcript variant 2 (LOC643367), mRNA.    |
| dbnnd1    | 0.493 | -2.028 | dysbindin (dystrobrevin binding protein 1) domain containing 1 (DBNDD1), transcript variant 1, mRNA.          |
| ccm2      | 0.493 | -2.028 | cerebral cavernous malformation 2 (CCM2), transcript variant 2, mRNA.                                         |
| psmb4     | 0.493 | -2.028 | proteasome (prosome, macropain) subunit, beta type, 4 (PSMB4), mRNA.                                          |
| c20orf24  | 0.493 | -2.028 | chromosome 20 open reading frame 24 (C20orf24), transcript variant 1, mRNA.                                   |
| c5orf37   | 0.493 | -2.029 | chromosome 5 open reading frame 37 (C5orf37), mRNA.                                                           |
| fam113b   | 0.493 | -2.029 | family with sequence similarity 113, member B (FAM113B), mRNA.                                                |
| cbx4      | 0.493 | -2.029 | chromobox homolog 4 (Pc class homolog, <i>Drosophila</i> ) (CBX4), mRNA.                                      |
| plrg1     | 0.493 | -2.029 | pleiotropic regulator 1 (PRL1 homolog, <i>Arabidopsis</i> ) (PLRG1), mRNA.                                    |
| bcs1l     | 0.493 | -2.029 | BCS1-like (yeast) (BCS1L), mRNA.                                                                              |
| zc3hc1    | 0.493 | -2.029 | zinc finger, C3HC-type containing 1 (ZC3HC1), mRNA.                                                           |
| dph5      | 0.493 | -2.03  | DPH5 homolog ( <i>S. cerevisiae</i> ) (DPH5), transcript variant 3, mRNA.                                     |
| kifc1     | 0.493 | -2.03  | kinesin family member C1 (KIFC1), mRNA.                                                                       |
| wdr71     | 0.493 | -2.03  | WD repeat domain 71 (WDR71), mRNA.                                                                            |
| zak       | 0.492 | -2.031 | sterile alpha motif and leucine zipper containing kinase AZK (ZAK), transcript variant 1, mRNA.               |
| ptpn12    | 0.492 | -2.031 | protein tyrosine phosphatase, non-receptor type 12 (PTPN12), mRNA.                                            |
| oraov1    | 0.492 | -2.031 | oral cancer overexpressed 1 (ORAOV1), mRNA.                                                                   |
| mgc21830  | 0.492 | -2.031 | chromosome 16 open reading frame 79 (C16orf79), mRNA.                                                         |
| tmem101   | 0.492 | -2.032 | transmembrane protein 101 (TMEM101), mRNA.                                                                    |
| clcn7     | 0.492 | -2.032 | chloride channel 7 (CLCN7), mRNA.                                                                             |
| mrps24    | 0.492 | -2.032 | mitochondrial ribosomal protein S24 (MRPS24), nuclear gene encoding mitochondrial protein, mRNA.              |
| pphiln1   | 0.492 | -2.032 | periphilin 1 (PPHLN1), transcript variant 4, mRNA.                                                            |
| cutc      | 0.492 | -2.033 | cutC copper transporter homolog ( <i>E. coli</i> ) (CUTC), mRNA.                                              |
| hspa1a    | 0.492 | -2.033 | heat shock 70kDa protein 1A (HSPA1A), mRNA.                                                                   |
| btbd7     | 0.492 | -2.033 | BTB (POZ) domain containing 7 (BTBD7), transcript variant 2, mRNA.                                            |
| myo10     | 0.492 | -2.033 | myosin X (MYO10), mRNA.                                                                                       |
| commd1    | 0.492 | -2.034 | copper metabolism (Murr1) domain containing 1 (COMMD1), mRNA.                                                 |
| mthfs     | 0.492 | -2.034 | 5,10-methenyltetrahydrofolate synthetase (5-formyltetrahydrofolate cyclo-ligase) (MTHFS), mRNA.               |
| xrcc1     | 0.492 | -2.034 | X-ray repair complementing defective repair in Chinese hamster cells 1 (XRCC1), mRNA.                         |
| pfkp      | 0.492 | -2.034 | phosphofructokinase, platelet (PFKP), mRNA.                                                                   |
| opa3      | 0.492 | -2.034 | optic atrophy 3 (autosomal recessive, with chorea and spastic paraplegia) (OPA3), transcript variant 2, mRNA. |

|           |       |        |                                                                                                             |
|-----------|-------|--------|-------------------------------------------------------------------------------------------------------------|
| 2'-pde    | 0.492 | -2.035 | 2'-phosphodiesterase (2'-PDE), mRNA.                                                                        |
| ctps      | 0.491 | -2.035 | CTP synthase (CTPS), mRNA.                                                                                  |
| dhx29     | 0.491 | -2.035 | DEAH (Asp-Glu-Ala-His) box polypeptide 29 (DHX29), mRNA.                                                    |
| kdelc1    | 0.491 | -2.035 | KDEL (Lys-Asp-Glu-Leu) containing 1 (KDEL1), mRNA.                                                          |
| sergef    | 0.491 | -2.035 | secretion regulating guanine nucleotide exchange factor (SERGEF), mRNA.                                     |
| xpo1      | 0.491 | -2.036 | exportin 1 (CRM1 homolog, yeast) (XPO1), mRNA.                                                              |
| plekha6   | 0.491 | -2.036 | pleckstrin homology domain containing, family A member 6 (PLEKHA6), mRNA.                                   |
| gpr108    | 0.491 | -2.036 | G protein-coupled receptor 108 (GPR108), transcript variant 1, mRNA.                                        |
| loc653188 | 0.491 | -2.036 | PREDICTED: similar to Beta-glucuronidase precursor, transcript variant 10 (LOC653188), mRNA.                |
| banf1     | 0.491 | -2.036 | barrier to autointegration factor 1 (BANF1), mRNA.                                                          |
| oip5      | 0.491 | -2.036 | Opa interacting protein 5 (OIP5), mRNA.                                                                     |
| sgpl1     | 0.491 | -2.036 | sphingosine-1-phosphate lyase 1 (SGPL1), mRNA.                                                              |
| c8orf33   | 0.491 | -2.036 | chromosome 8 open reading frame 33 (C8orf33), mRNA.                                                         |
| bbs4      | 0.491 | -2.036 | Bardet-Biedl syndrome 4 (BBS4), mRNA.                                                                       |
| pbk       | 0.491 | -2.036 | PDZ binding kinase (PBK), mRNA.                                                                             |
| scml1     | 0.491 | -2.037 | sex comb on midleg-like 1 (Drosophila) (SCML1), transcript variant 1, mRNA.                                 |
| snrpd1    | 0.491 | -2.037 | small nuclear ribonucleoprotein D1 polypeptide 16kDa (SNRPD1), mRNA.                                        |
| tbc1d2    | 0.491 | -2.037 | TBC1 domain family, member 2 (TBC1D2), mRNA.                                                                |
| ikbkb     | 0.491 | -2.037 | inhibitor of kappa light polypeptide gene enhancer in B-cells, kinase beta (IKBKB), mRNA.                   |
| c8orf41   | 0.491 | -2.037 | chromosome 8 open reading frame 41 (C8orf41), mRNA.                                                         |
| mta1      | 0.491 | -2.037 | metastasis associated 1 (MTA1), mRNA.                                                                       |
| cnn3      | 0.491 | -2.037 | calponin 3, acidic (CNN3), mRNA.                                                                            |
| ror1      | 0.491 | -2.038 | receptor tyrosine kinase-like orphan receptor 1 (ROR1), mRNA.                                               |
| c9orf9    | 0.491 | -2.038 | chromosome 9 open reading frame 9 (C9orf9), mRNA.                                                           |
| myo9b     | 0.491 | -2.038 | myosin IXB (MYO9B), mRNA.                                                                                   |
| znf11b    | 0.491 | -2.038 | zinc finger protein 33B (ZNF33B), mRNA.                                                                     |
| smad4     | 0.491 | -2.038 | SMAD family member 4 (SMAD4), mRNA.                                                                         |
| acs13     | 0.491 | -2.038 | acyl-CoA synthetase long-chain family member 3 (ACSL3), transcript variant 1, mRNA.                         |
| qil1      | 0.491 | -2.039 | hypothetical protein P117 (P117), mRNA.                                                                     |
| c13orf1   | 0.491 | -2.039 | chromosome 13 open reading frame 1 (C13orf1), mRNA.                                                         |
| csnk2a1   | 0.49  | -2.039 | casein kinase 2, alpha 1 polypeptide (CSNK2A1), transcript variant 1, mRNA.                                 |
| agpat7    | 0.49  | -2.039 | 1-acylglycerol-3-phosphate O-acyltransferase 7 (lysophosphatidic acid acyltransferase, eta) (AGPAT7), mRNA. |
| gpr115    | 0.49  | -2.039 | G protein-coupled receptor 115 (GPR115), mRNA.                                                              |
| polr2f    | 0.49  | -2.039 | polymerase (RNA) II (DNA directed) polypeptide F (POLR2F), mRNA.                                            |
| tra2a     | 0.49  | -2.039 | transformer-2 alpha (TRA2A), mRNA.                                                                          |
| hs.473191 | 0.49  | -2.039 | cDNA FLJ34428 fis, clone HLUNG2000761                                                                       |
| cxorf40a  | 0.49  | -2.039 | chromosome X open reading frame 40A (CXorf40A), mRNA.                                                       |
| usp5      | 0.49  | -2.039 | ubiquitin specific peptidase 5 (isopeptidase T) (USP5), mRNA.                                               |
| znf410    | 0.49  | -2.04  | zinc finger protein 410 (ZNF410), mRNA.                                                                     |
| prkdc     | 0.49  | -2.04  | protein kinase, DNA-activated, catalytic polypeptide (PRKDC), transcript variant 1, mRNA.                   |
| stk19     | 0.49  | -2.04  | serine/threonine kinase 19 (STK19), transcript variant 2, mRNA.                                             |
| akt1s1    | 0.49  | -2.04  | AKT1 substrate 1 (proline-rich) (AKT1S1), mRNA.                                                             |

|            |       |                                                                                                                                           |
|------------|-------|-------------------------------------------------------------------------------------------------------------------------------------------|
| rps19bp1   | 0.49  | -2.041 ribosomal protein S19 binding protein 1 (RPS19BP1), mRNA.                                                                          |
| wdr50      | 0.49  | -2.041 WD repeat domain 50 (WDR50), mRNA.                                                                                                 |
| lyar       | 0.49  | -2.041 Ly1 antibody reactive homolog (mouse) (LYAR), mRNA.                                                                                |
| mgc2574    | 0.49  | -2.041 coiled-coil domain containing 86 (CCDC86), mRNA.                                                                                   |
| fam98c     | 0.49  | -2.041 family with sequence similarity 98, member C (FAM98C), mRNA.                                                                       |
| sdccag3    | 0.49  | -2.041 serologically defined colon cancer antigen 3 (SDCCAG3), mRNA.                                                                      |
| c11orf24   | 0.49  | -2.041 chromosome 11 open reading frame 24 (C11orf24), mRNA.                                                                              |
| c7orf26    | 0.49  | -2.041 chromosome 7 open reading frame 26 (C7orf26), mRNA.                                                                                |
| hddc3      | 0.49  | -2.042 HD domain containing 3 (HDDC3), mRNA.                                                                                              |
| loc649169  | 0.49  | -2.042 PREDICTED: similar to WD-repeat protein 74 (NOP seven-associated protein 1), transcript variant 1 (LOC649169), mRNA.               |
| bcl9       | 0.49  | -2.043 B-cell CLL/lymphoma 9 (BCL9), mRNA.                                                                                                |
| pex19      | 0.49  | -2.043 peroxisomal biogenesis factor 19 (PEX19), mRNA.                                                                                    |
| wnt3       | 0.489 | -2.043 wingless-type MMTV integration site family, member 3 (WNT3), mRNA.                                                                 |
| loc51035   | 0.489 | -2.043 SAPK substrate protein 1 (LOC51035), mRNA.                                                                                         |
| nt5m       | 0.489 | -2.043 5',3'-nucleotidase, mitochondrial (NT5M), nuclear gene encoding mitochondrial protein, mRNA.                                       |
| actr2      | 0.489 | -2.043 ARP2 actin-related protein 2 homolog (yeast) (ACTR2), transcript variant 1, mRNA.                                                  |
| nek11      | 0.489 | -2.043 NIMA (never in mitosis gene a)- related kinase 11 (NEK11), transcript variant 2, mRNA.                                             |
| tns4       | 0.489 | -2.043 tensin 4 (TNS4), mRNA.                                                                                                             |
| cdt1       | 0.489 | -2.044 chromatin licensing and DNA replication factor 1 (CDT1), mRNA.                                                                     |
| ta-pp2c    | 0.489 | -2.044 PTC7 protein phosphatase homolog ( <i>S. cerevisiae</i> ) (PPTC7), mRNA.                                                           |
| c14orf32   | 0.489 | -2.044 chromosome 14 open reading frame 32 (C14orf32), mRNA.                                                                              |
| sphk1      | 0.489 | -2.044 sphingosine kinase 1 (SPHK1), transcript variant 2, mRNA.                                                                          |
| c20orf98   | 0.489 | -2.044 neurensin 2 (NRSN2), mRNA.                                                                                                         |
| rnut1      | 0.489 | -2.044 RNA, U transporter 1 (RNUT1), mRNA.                                                                                                |
| cinp       | 0.489 | -2.044 cyclin-dependent kinase 2-interacting protein (CINP), mRNA.                                                                        |
| angel1     | 0.489 | -2.045 angel homolog 1 ( <i>Drosophila</i> ) (ANGEL1), mRNA.                                                                              |
| znf444     | 0.489 | -2.045 zinc finger protein 444 (ZNF444), mRNA.                                                                                            |
| rabep1     | 0.489 | -2.045 rabaptin, RAB GTPase binding effector protein 1 (RABEP1), mRNA.                                                                    |
| hs.20255   | 0.489 | -2.045 AV652851 GLC cDNA clone GLCDEG06 3, mRNA sequence                                                                                  |
| col1a1     | 0.489 | -2.045 collagen, type I, alpha 1 (COL1A1), mRNA.                                                                                          |
| seh1l      | 0.489 | -2.045 SEH1-like ( <i>S. cerevisiae</i> ) (SEH1L), transcript variant 1, mRNA.                                                            |
| blm        | 0.489 | -2.046 Bloom syndrome (BLM), mRNA.                                                                                                        |
| gspt1      | 0.489 | -2.046 G1 to S phase transition 1 (GSPT1), mRNA.                                                                                          |
| jam3       | 0.489 | -2.046 junctional adhesion molecule 3 (JAM3), mRNA.                                                                                       |
| znf694     | 0.489 | -2.046 zinc finger with KRAB and SCAN domains 2 (ZKSCAN2), mRNA.                                                                          |
| st6galnac6 | 0.489 | -2.046 ST6 (alpha-N-acetyl-neuraminyl-2,3-beta-galactosyl-1, 3)-N-acetylgalactosaminide alpha-2,6-sialyltransferase 6 (ST6GALNAC6), mRNA. |
| c1orf121   | 0.489 | -2.047 chromosome 1 open reading frame 121 (C1orf121), mRNA.                                                                              |
| nr3c1      | 0.489 | -2.047 nuclear receptor subfamily 3, group C, member 1 (glucocorticoid receptor) (NR3C1), transcript variant 4, mRNA.                     |
| hs.91389   | 0.489 | -2.047 cDNA clone IMAGE:3079901                                                                                                           |
| eme1       | 0.489 | -2.047 essential meiotic endonuclease 1 homolog 1 ( <i>S. pombe</i> ) (EME1), mRNA.                                                       |

|           |       |                                                                                                                               |
|-----------|-------|-------------------------------------------------------------------------------------------------------------------------------|
| zyg11bl   | 0.488 | -2.047 zer-1 homolog ( <i>C. elegans</i> ) (ZER1), mRNA.                                                                      |
| tbc1d14   | 0.488 | -2.048 TBC1 domain family, member 14 (TBC1D14), mRNA.                                                                         |
| asphd1    | 0.488 | -2.048 aspartate beta-hydroxylase domain containing 1 (ASPHD1), mRNA.                                                         |
| rhobtb2   | 0.488 | -2.049 Rho-related BTB domain containing 2 (RHOBTB2), mRNA.                                                                   |
| bag5      | 0.488 | -2.049 BCL2-associated athanogene 5 (BAG5), transcript variant 3, mRNA.                                                       |
| sez6l2    | 0.488 | -2.049 seizure related 6 homolog (mouse)-like 2 (SEZ6L2), transcript variant 2, mRNA.                                         |
| sbds      | 0.488 | -2.049 Shwachman-Bodian-Diamond syndrome (SBDS), mRNA.                                                                        |
| pde6d     | 0.488 | -2.049 phosphodiesterase 6D, cGMP-specific, rod, delta (PDE6D), mRNA.                                                         |
| ibtk      | 0.488 | -2.049 inhibitor of Bruton agammaglobulinemia tyrosine kinase (IBTK), mRNA.                                                   |
| abcb10    | 0.488 | -2.05 ATP-binding cassette, sub-family B (MDR/TAP), member 10 (ABCB10), nuclear gene encoding mitochondrial protein, mRNA.    |
| loc646900 | 0.488 | -2.05 PREDICTED: similar to zinc finger and BTB domain containing 8 opposite strand (LOC646900), mRNA.                        |
| loc652162 | 0.488 | -2.05 PREDICTED: similar to 60S ribosomal protein L32 (LOC652162), mRNA.                                                      |
| slc4a1ap  | 0.488 | -2.05 solute carrier family 4 (anion exchanger), member 1, adaptor protein (SLC4A1AP), mRNA.                                  |
| rkh3      | 0.488 | -2.05 mex-3 homolog B ( <i>C. elegans</i> ) (MEX3B), mRNA.                                                                    |
| cnap1     | 0.488 | -2.05 non-SMC condensin I complex, subunit D2 (NCAPD2), mRNA.                                                                 |
| kpna6     | 0.488 | -2.05 karyopherin alpha 6 (importin alpha 7) (KPNA6), mRNA.                                                                   |
| lrdd      | 0.488 | -2.05 leucine-rich repeats and death domain containing (LRDD), transcript variant 2, mRNA.                                    |
| tinp1     | 0.488 | -2.051 TGF beta-inducible nuclear protein 1 (TINP1), mRNA.                                                                    |
| trim56    | 0.488 | -2.051 tripartite motif-containing 56 (TRIM56), mRNA.                                                                         |
| gpaa1     | 0.488 | -2.051 GPAA1P anchor attachment protein 1 homolog (yeast) (GPAA1), mRNA.                                                      |
| prep      | 0.488 | -2.051 prolyl endopeptidase (PREP), mRNA.                                                                                     |
| atg12     | 0.488 | -2.051 ATG12 autophagy related 12 homolog ( <i>S. cerevisiae</i> ) (ATG12), mRNA.                                             |
| znf195    | 0.487 | -2.051 zinc finger protein 195 (ZNF195), mRNA.                                                                                |
| uhmk1     | 0.487 | -2.052 U2AF homology motif (UHM) kinase 1 (UHMK1), mRNA.                                                                      |
| loc126208 | 0.487 | -2.052 zinc finger protein 787 (ZNF787), mRNA.                                                                                |
| met       | 0.487 | -2.052 met proto-oncogene (hepatocyte growth factor receptor) (MET), mRNA.                                                    |
| hadhsc    | 0.487 | -2.052 L-3-hydroxyacyl-Coenzyme A dehydrogenase, short chain (HADHSC), mRNA.                                                  |
| os9       | 0.487 | -2.052 amplified in osteosarcoma (OS9), transcript variant 1, mRNA.                                                           |
| ifp38     | 0.487 | -2.052 IFP38 (IFP38), mRNA.                                                                                                   |
| pycr2     | 0.487 | -2.052 pyrroline-5-carboxylate reductase family, member 2 (PYCR2), mRNA.                                                      |
| acy1      | 0.487 | -2.053 aminoacylase 1 (ACY1), mRNA.                                                                                           |
| nubp1     | 0.487 | -2.053 nucleotide binding protein 1 (MinD homolog, <i>E. coli</i> ) (NUBP1), mRNA.                                            |
| tp53ap1   | 0.487 | -2.054 TP53 activated protein 1 (TP53AP1), mRNA.                                                                              |
| mrpl33    | 0.487 | -2.054 mitochondrial ribosomal protein L33 (MRPL33), nuclear gene encoding mitochondrial protein, transcript variant 1, mRNA. |
| flj21827  | 0.487 | -2.054 hypothetical protein FLJ21827 (FLJ21827), mRNA.                                                                        |
| loc139886 | 0.487 | -2.054 hypothetical protein LOC139886 (LOC139886), mRNA.                                                                      |
| ddefl1    | 0.487 | -2.054 development and differentiation enhancing factor-like 1 (DDEFL1), mRNA.                                                |
| fksg24    | 0.487 | -2.054 hypothetical protein MGC12972 (FKSG24), mRNA.                                                                          |
| arhgef17  | 0.487 | -2.054 Rho guanine nucleotide exchange factor (GEF) 17 (ARHGEF17), mRNA.                                                      |
| znf42     | 0.487 | -2.054 myeloid zinc finger 1 (MZF1), transcript variant 2, mRNA.                                                              |



|           |       |                                                                                                                     |
|-----------|-------|---------------------------------------------------------------------------------------------------------------------|
| saal1     | 0.487 | -2.055 serum amyloid A-like 1 (SAAL1), mRNA.                                                                        |
| flj41423  | 0.487 | -2.055 FLJ41423 protein (FLJ41423), mRNA.                                                                           |
| hs.576106 | 0.487 | -2.055 cDNA FLJ40058 fis, clone TCOLN1000180                                                                        |
| alg3      | 0.487 | -2.055 asparagine-linked glycosylation 3homolog(yeast, alpha-1,3-mannosyltransferase)(ALG3),trans. variant 3, mRNA. |
| rxfank    | 0.487 | -2.055 regulatory factor X-associated ankyrin-containing protein (RFXANK), transcript variant 1, mRNA.              |
| osgep     | 0.487 | -2.055 O-sialoglycoprotein endopeptidase (OSGEP), mRNA.                                                             |
| tmem55b   | 0.487 | -2.056 transmembrane protein 55B (TMEM55B), mRNA.                                                                   |
| hs.98330  | 0.487 | -2.056 PREDICTED: hypothetical LOC388227 (LOC388227), mRNA                                                          |
| fkbp3     | 0.487 | -2.056 FK506 binding protein 3, 25kDa (FKBP3), mRNA.                                                                |
| polr3f    | 0.486 | -2.056 polymerase (RNA) III (DNA directed) polypeptide F, 39 kDa (POLR3F), mRNA.                                    |
| zhx3      | 0.486 | -2.056 zinc fingers and homeoboxes 3 (ZHX3), mRNA.                                                                  |
| c9orf21   | 0.486 | -2.056 chromosome 9 open reading frame 21 (C9orf21), mRNA.                                                          |
| snd1      | 0.486 | -2.056 staphylococcal nuclease and tudor domain containing 1 (SND1), mRNA.                                          |
| rnu3ip2   | 0.486 | -2.057 RNA, U3 small nucleolar interacting protein 2 (RNU3IP2), mRNA.                                               |
| aurka     | 0.486 | -2.057 aurora kinase A (AURKA), transcript variant 3, mRNA.                                                         |
| ankrd16   | 0.486 | -2.057 ankyrin repeat domain 16 (ANKRD16), transcript variant 2, mRNA.                                              |
| c1orf164  | 0.486 | -2.057 chromosome 1 open reading frame 164 (C1orf164), mRNA.                                                        |
| lgals3bp  | 0.486 | -2.057 lectin, galactoside-binding, soluble, 3 binding protein (LGALS3BP), mRNA.                                    |
| aste1     | 0.486 | -2.057 asteroid homolog 1 (Drosophila) (ASTE1), mRNA.                                                               |
| stx12     | 0.486 | -2.057 syntaxin 12 (STX12), mRNA.                                                                                   |
| dusp23    | 0.486 | -2.058 dual specificity phosphatase 23 (DUSP23), mRNA.                                                              |
| slc45a4   | 0.486 | -2.058 solute carrier family 45, member 4 (SLC45A4), mRNA.                                                          |
| pigo      | 0.486 | -2.058 phosphatidylinositol glycan anchor biosynthesis, class O (PIGO), transcript variant 1, mRNA.                 |
| gmeb1     | 0.486 | -2.058 glucocorticoid modulatory element binding protein 1 (GMEB1), transcript variant 2, mRNA.                     |
| hoxd13    | 0.486 | -2.058 homeobox D13 (HOXD13), mRNA.                                                                                 |
| map3k6    | 0.486 | -2.058 mitogen-activated protein kinase kinase kinase 6 (MAP3K6), mRNA.                                             |
| cmtm6     | 0.486 | -2.058 CKLF-like MARVEL transmembrane domain containing 6 (CMTM6), mRNA.                                            |
| rabl2b    | 0.486 | -2.059 RAB, member of RAS oncogene family-like 2B (RABL2B), transcript variant 2, mRNA.                             |
| swap70    | 0.486 | -2.06 SWAP-70 protein (SWAP70), mRNA.                                                                               |
| tbk1      | 0.486 | -2.06 TANK-binding kinase 1 (TBK1), mRNA.                                                                           |
| ccdc47    | 0.486 | -2.06 coiled-coil domain containing 47 (CCDC47), mRNA.                                                              |
| plxna1    | 0.485 | -2.06 plexin A1 (PLXNA1), mRNA.                                                                                     |
| cpsf3l    | 0.485 | -2.06 cleavage and polyadenylation specific factor 3-like (CPSF3L), transcript variant 1, mRNA.                     |
| ube2t     | 0.485 | -2.06 ubiquitin-conjugating enzyme E2T (putative) (UBE2T), mRNA.                                                    |
| dcblld1   | 0.485 | -2.06 discoidin, CUB and LCCL domain containing 1 (DCBLD1), mRNA.                                                   |
| katnal2   | 0.485 | -2.06 katanin p60 subunit A-like 2 (KATNAL2), mRNA.                                                                 |
| csad      | 0.485 | -2.06 cysteine sulfinic acid decarboxylase (CSAD), mRNA.                                                            |
| c19orf24  | 0.485 | -2.061 chromosome 19 open reading frame 24 (C19orf24), mRNA.                                                        |
| flj21901  | 0.485 | -2.061 FAST kinase domains 1 (FASTKD1), mRNA.                                                                       |
| vcpip1    | 0.485 | -2.061 valosin containing protein (p97)/p47 complex interacting protein 1 (VCP1P1), mRNA.                           |
| znf655    | 0.485 | -2.061 zinc finger protein 655 (ZNF655), transcript variant 6, mRNA.                                                |
| loc645345 | 0.485 | -2.061 PREDICTED: similar to Coiled-coil-helix-coiled-coil-helix domain containing protein 2                        |

|           |       |                                                                                                                      |
|-----------|-------|----------------------------------------------------------------------------------------------------------------------|
|           |       | (HCV NS2 trans-regulated protein) (NS2TP) (LOC645345), mRNA.                                                         |
| flj13236  | 0.485 | -2.062 hypothetical protein FLJ13236 (FLJ13236), mRNA.                                                               |
| phf20     | 0.485 | -2.062 PHD finger protein 20 (PHF20), mRNA.                                                                          |
| dync2h1   | 0.485 | -2.062 dynein, cytoplasmic 2, heavy chain 1 (DYNC2H1), mRNA.                                                         |
| loc650832 | 0.485 | -2.062 PREDICTED: similar to mitogen-activated protein kinase kinase 3 isoform A (LOC650832), mRNA.                  |
| yrdc      | 0.485 | -2.062 yrdC domain containing (E. coli) (YRDC), mRNA.                                                                |
| txndc14   | 0.485 | -2.062 thioredoxin domain containing 14 (TXNDC14), mRNA.                                                             |
| lamc1     | 0.485 | -2.063 laminin, gamma 1 (formerly LAMB2) (LAMC1), mRNA.                                                              |
| cice      | 0.485 | -2.063 cell death-inducing DFFA-like effector c pseudogene (CIDECP) on chromosome 3.                                 |
| kctd9     | 0.485 | -2.063 potassium channel tetramerisation domain containing 9 (KCTD9), mRNA.                                          |
| psarl     | 0.485 | -2.063 presenilin associated, rhomboid-like (PSARL), mRNA.                                                           |
| ifit5     | 0.485 | -2.063 interferon-induced protein with tetratricopeptide repeats 5 (IFIT5), mRNA.                                    |
| ndufb11   | 0.485 | -2.063 NADH dehydrogenase (ubiquinone) 1 beta subcomplex, 11, 17.3kDa (NDUFB11), mRNA.                               |
| sacm1l    | 0.485 | -2.063 SAC1 suppressor of actin mutations 1-like (yeast) (SACM1L), mRNA.                                             |
| xrcc6     | 0.485 | -2.063 X-ray repair complementing defective repair in Chinese hamster cells 6 (Ku autoantigen, 70kDa) (XRCC6), mRNA. |
| unc50     | 0.485 | -2.063 unc-50 homolog (C. elegans) (UNC50), mRNA.                                                                    |
| flj20272  | 0.485 | -2.064 tetratricopeptide repeat domain 27 (TTC27), mRNA.                                                             |
| flj10661  | 0.485 | -2.064 family with sequence similarity 86, member C (FAM86C), transcript variant 2, mRNA.                            |
| mon2      | 0.485 | -2.064 MON2 homolog (yeast) (MON2), mRNA.                                                                            |
| coq10a    | 0.485 | -2.064 coenzyme Q10 homolog A (S. cerevisiae) (COQ10A), mRNA.                                                        |
| wdr46     | 0.485 | -2.064 WD repeat domain 46 (WDR46), mRNA.                                                                            |
| rpl27a    | 0.485 | -2.064 ribosomal protein L27a (RPL27A), mRNA.                                                                        |
| ssr1      | 0.484 | -2.064 signal sequence receptor, alpha (translocon-associated protein alpha) (SSR1), mRNA.                           |
| mn1       | 0.484 | -2.065 meningioma (disrupted in balanced translocation) 1 (MN1), mRNA.                                               |
| tmbim1    | 0.484 | -2.065 transmembrane BAX inhibitor motif containing 1 (TMBIM1), mRNA.                                                |
| impa2     | 0.484 | -2.065 inositol(myo)-1(or 4)-monophosphatase 2 (IMPA2), mRNA.                                                        |
| loc643997 | 0.484 | -2.065 PREDICTED: similar to peptidylprolyl isomerase A isoform 1 (LOC643997), mRNA.                                 |
| cda08     | 0.484 | -2.065 T-cell immunomodulatory protein (CDA08), mRNA.                                                                |
| genx-3414 | 0.484 | -2.066 genethonin 1 (GENX-3414), mRNA.                                                                               |
| ptges3    | 0.484 | -2.066 prostaglandin E synthase 3 (cytosolic) (PTGES3), mRNA.                                                        |
| snx19     | 0.484 | -2.066 sorting nexin 19 (SNX19), mRNA.                                                                               |
| dcc1      | 0.484 | -2.066 defective in sister chromatid cohesion homolog 1 (S. cerevisiae) (DCC1), mRNA.                                |
| apoa1bp   | 0.484 | -2.066 apolipoprotein A-I binding protein (APOA1BP), mRNA.                                                           |
| prp3      | 0.484 | -2.066 proline rich 3 (PRR3), mRNA.                                                                                  |
| them2     | 0.484 | -2.066 thioesterase superfamily member 2 (THEM2), mRNA.                                                              |
| twistnb   | 0.484 | -2.067 TWIST neighbor (TWISTNB), mRNA.                                                                               |
| hs.10862  | 0.484 | -2.067 cDNA: FLJ23313 fis, clone HEP11919                                                                            |
| kiaa0274  | 0.484 | -2.067 FIG4 homolog (S. cerevisiae) (FIG4), mRNA.                                                                    |
| fchsd2    | 0.484 | -2.067 FCH and double SH3 domains 2 (FCHSD2), mRNA.                                                                  |
| mapk11    | 0.484 | -2.067 mitogen-activated protein kinase 11 (MAPK11), transcript variant 2, mRNA.                                     |
| gtf3a     | 0.484 | -2.067 general transcription factor IIIA (GTF3A), mRNA.                                                              |
| fdps      | 0.484 | -2.067 farnesyl diphosphate synthase (farnesyl pyrophosphate synthetase,                                             |

dimethylallyltranstransferase, geranyltranstransferase) (FDPS), mRNA.

|           |       |        |                                                                                                                     |
|-----------|-------|--------|---------------------------------------------------------------------------------------------------------------------|
| hs.556082 | 0.484 | -2.067 | cDNA clone MGC:13035 IMAGE:3613409, complete cds                                                                    |
| tpd5211   | 0.484 | -2.067 | tumor protein D52-like 1 (TPD52L1), transcript variant 4, mRNA.                                                     |
| kctd13    | 0.484 | -2.067 | potassium channel tetramerisation domain containing 13 (KCTD13), mRNA.                                              |
| loc541469 | 0.484 | -2.067 | hypothetical protein LOC541469 (LOC541469), mRNA.                                                                   |
| serpinb6  | 0.484 | -2.067 | serpin peptidase inhibitor, clade B (ovalbumin), member 6 (SERPINB6), mRNA.                                         |
| c20orf52  | 0.484 | -2.067 | chromosome 20 open reading frame 52 (C20orf52), mRNA.                                                               |
| znhit3    | 0.484 | -2.068 | zinc finger, HIT type 3 (ZNHIT3), transcript variant 1, mRNA.                                                       |
| kif14     | 0.484 | -2.068 | kinesin family member 14 (KIF14), mRNA.                                                                             |
| hs.553301 | 0.484 | -2.068 | AV737317 CB cDNA clone CBCAQH03 5, mRNA sequence                                                                    |
| mrpl20    | 0.484 | -2.068 | mitochondrial ribosomal protein L20 (MRPL20), nuclear gene encoding mitochondrial protein, mRNA.                    |
| kiaa0240  | 0.484 | -2.068 | KIAA0240 (KIAA0240), mRNA.                                                                                          |
| bri3      | 0.484 | -2.068 | brain protein I3 (BRI3), mRNA.                                                                                      |
| tfap2a    | 0.483 | -2.068 | transcription factor AP-2 alpha (activating enhancer binding protein 2 alpha) (TFAP2A), transcript variant 1, mRNA. |
| atxn3     | 0.483 | -2.068 | ataxin 3 (ATXN3), transcript variant 2, mRNA.                                                                       |
| myo9a     | 0.483 | -2.069 | myosin IXA (MYO9A), mRNA.                                                                                           |
| nipsnap1  | 0.483 | -2.069 | nipsnap homolog 1 (C. elegans) (NIPSNAP1), mRNA.                                                                    |
| oprs1     | 0.483 | -2.069 | opioid receptor, sigma 1 (OPRS1), transcript variant 5, mRNA.                                                       |
| tmem80    | 0.483 | -2.069 | transmembrane protein 80 (TMEM80), mRNA.                                                                            |
| amd1      | 0.483 | -2.069 | adenosylmethionine decarboxylase 1 (AMD1), transcript variant 1, mRNA.                                              |
| fcho1     | 0.483 | -2.069 | FCH domain only 1 (FCHO1), mRNA.                                                                                    |
| psmd13    | 0.483 | -2.069 | proteasome (prosome, macropain) 26S subunit, non-ATPase, 13 (PSMD13), transcript variant 1, mRNA.                   |
| vps39     | 0.483 | -2.07  | vacuolar protein sorting 39 (yeast) (VPS39), mRNA.                                                                  |
| phf19     | 0.483 | -2.07  | PHD finger protein 19 (PHF19), transcript variant 2, mRNA.                                                          |
| lsm5      | 0.483 | -2.07  | LSM5 homolog, U6 small nuclear RNA associated (S. cerevisiae) (LSM5), mRNA.                                         |
| tmco1     | 0.483 | -2.07  | transmembrane and coiled-coil domains 1 (TMCO1), mRNA.                                                              |
| mnab      | 0.483 | -2.07  | ring finger and CCCH-type zinc finger domains 2 (RC3H2), mRNA.                                                      |
| cntnap1   | 0.483 | -2.07  | contactin associated protein 1 (CNTNAP1), mRNA.                                                                     |
| hnrph1    | 0.483 | -2.07  | heterogeneous nuclear ribonucleoprotein H1 (H) (HNRPH1), mRNA.                                                      |
| bsg       | 0.483 | -2.071 | basigin (Ok blood group) (BSG), transcript variant 1, mRNA.                                                         |
| sema3a    | 0.483 | -2.071 | sema domain, immunoglobulin domain (Ig), short basic domain, secreted, (semaphorin) 3A (SEMA3A), mRNA.              |
| tm4sf18   | 0.483 | -2.071 | transmembrane 4 L six family member 18 (TM4SF18), mRNA.                                                             |
| flj20551  | 0.483 | -2.071 | solute carrier family 25, member 38 (SLC25A38), mRNA.                                                               |
| c11orf1   | 0.483 | -2.071 | chromosome 11 open reading frame 1 (C11orf1), mRNA.                                                                 |
| coq3      | 0.483 | -2.071 | coenzyme Q3 homolog, methyltransferase (yeast) (COQ3), mRNA.                                                        |
| loc90355  | 0.483 | -2.071 | chromosome 5 open reading frame 30 (C5orf30), mRNA.                                                                 |
| vps45a    | 0.483 | -2.071 | vacuolar protein sorting 45A (yeast) (VPS45A), mRNA.                                                                |
| c9orf64   | 0.483 | -2.071 | chromosome 9 open reading frame 64 (C9orf64), mRNA.                                                                 |
| ccnd1     | 0.483 | -2.071 | cyclin D1 (PRAD1: parathyroid adenomatosis 1) (CCND1), mRNA.                                                        |
| ubxd6     | 0.483 | -2.071 | UBX domain containing 6 (UBXD6), mRNA.                                                                              |
| rnmtl1    | 0.483 | -2.071 | RNA methyltransferase like 1 (RNMTL1), mRNA.                                                                        |
| tbc1d9    | 0.483 | -2.072 | TBC1 domain family, member 9 (with GRAM domain) (TBC1D9), mRNA.                                                     |

|          |       |                                                                                                               |
|----------|-------|---------------------------------------------------------------------------------------------------------------|
| flj31951 | 0.483 | -2.072 ring finger protein 145 (RNF145), mRNA.                                                                |
| wdr37    | 0.483 | -2.072 WD repeat domain 37 (WDR37), mRNA.                                                                     |
| flj10099 | 0.483 | -2.072 hypothetical protein FLJ10099 (FLJ10099), mRNA.                                                        |
| dctn1    | 0.483 | -2.072 dynactin 1 (p150, glued homolog, Drosophila) (DCTN1), transcript variant 2, mRNA.                      |
| kiaa0194 | 0.483 | -2.072 PREDICTED: KIAA0194 protein (KIAA0194), mRNA.                                                          |
| myh4     | 0.483 | -2.072 myosin, heavy polypeptide 4, skeletal muscle (MYH4), mRNA.                                             |
| pak1     | 0.483 | -2.073 p21/Cdc42/Rac1-activated kinase 1 (STE20 homolog, yeast) (PAK1), mRNA.                                 |
| c1orf198 | 0.483 | -2.073 chromosome 1 open reading frame 198 (C1orf198), mRNA.                                                  |
| hla-e    | 0.482 | -2.073 major histocompatibility complex, class I, E (HLA-E), mRNA.                                            |
| atp6v0e1 | 0.482 | -2.073 ATPase, H <sup>+</sup> transporting, lysosomal 9kDa, V0 subunit e1 (ATP6V0E1), mRNA.                   |
| pms2     | 0.482 | -2.073 PMS2 postmeiotic segregation increased 2 ( <i>S. cerevisiae</i> ) (PMS2), transcript variant 1, mRNA.  |
| clndnd2  | 0.482 | -2.073 claudin domain containing 2 (CLDND2), mRNA.                                                            |
| ppox     | 0.482 | -2.073 protoporphyrinogen oxidase (PPOX), nuclear gene encoding mitochondrial protein, mRNA.                  |
| gnb1     | 0.482 | -2.073 guanine nucleotide binding protein (G protein), beta polypeptide 1 (GNB1), mRNA.                       |
| ddx1     | 0.482 | -2.073 DEAD (Asp-Glu-Ala-Asp) box polypeptide 1 (DDX1), mRNA.                                                 |
| tusc4    | 0.482 | -2.073 tumor suppressor candidate 4 (TUSC4), mRNA.                                                            |
| nte      | 0.482 | -2.073 neuropathy target esterase (NTE), mRNA.                                                                |
| cldn2    | 0.482 | -2.074 claudin 2 (CLDN2), mRNA.                                                                               |
| ccdc16   | 0.482 | -2.074 coiled-coil domain containing 16 (CCDC16), mRNA.                                                       |
| plxnb2   | 0.482 | -2.074 PREDICTED: plexin B2 (PLXNB2), mRNA.                                                                   |
| pex6     | 0.482 | -2.074 peroxisomal biogenesis factor 6 (PEX6), mRNA.                                                          |
| pigv     | 0.482 | -2.074 phosphatidylinositol glycan anchor biosynthesis, class V (PIGV), mRNA.                                 |
| cast     | 0.482 | -2.074 calpastatin (CAST), transcript variant 8, mRNA.                                                        |
| tp53inp2 | 0.482 | -2.074 tumor protein p53 inducible nuclear protein 2 (TP53INP2), mRNA.                                        |
| erich1   | 0.482 | -2.074 glutamate-rich 1 (ERICH1), mRNA.                                                                       |
| dcun1d5  | 0.482 | -2.074 DCN1, defective in cullin neddylation 1, domain containing 5 ( <i>S. cerevisiae</i> ) (DCUN1D5), mRNA. |
| ash2l    | 0.482 | -2.074 ash2 (absent, small, or homeotic)-like ( <i>Drosophila</i> ) (ASH2L), mRNA.                            |
| pmpcb    | 0.482 | -2.075 peptidase (mitochondrial processing) beta (PMPCB), mRNA.                                               |
| ostm1    | 0.482 | -2.075 osteopetrosis associated transmembrane protein 1 (OSTM1), mRNA.                                        |
| etv4     | 0.482 | -2.075 ets variant gene 4 (E1A enhancer binding protein, E1AF) (ETV4), mRNA.                                  |
| zfx      | 0.482 | -2.075 zinc finger protein, X-linked (ZFX), mRNA.                                                             |
| hspc023  | 0.482 | -2.076 HSPC023 protein (HSPC023), mRNA.                                                                       |
| paqr7    | 0.482 | -2.076 progesterin and adipoQ receptor family member VII (PAQR7), mRNA.                                       |
| flj23322 | 0.482 | -2.076 hypothetical protein FLJ23322 (FLJ23322), mRNA.                                                        |
| nip7     | 0.482 | -2.077 nuclear import 7 homolog ( <i>S. cerevisiae</i> ) (NIP7), mRNA.                                        |
| myo1c    | 0.482 | -2.077 myosin IC (MYO1C), mRNA.                                                                               |
| dlst     | 0.481 | -2.077 dihydrolipoamide S-succinyltransferase (E2 component of 2-oxo-glutarate complex) (DLST), mRNA.         |
| slc25a28 | 0.481 | -2.077 solute carrier family 25, member 28 (SLC25A28), mRNA.                                                  |
| cdc42bpa | 0.481 | -2.077 CDC42 binding protein kinase alpha (DMPK-like) (CDC42BPA), transcript variant B, mRNA.                 |
| dgcr8    | 0.481 | -2.078 DiGeorge syndrome critical region gene 8 (DGCR8), mRNA.                                                |
| arcn1    | 0.481 | -2.078 archain 1 (ARCN1), mRNA.                                                                               |
| rw1      | 0.481 | -2.078 PREDICTED: RW1 protein, transcript variant 1 (RW1), mRNA.                                              |

|           |       |                                                                                                                                                           |
|-----------|-------|-----------------------------------------------------------------------------------------------------------------------------------------------------------|
| nthl1     | 0.481 | -2.078 nth endonuclease III-like 1 ( <i>E. coli</i> ) (NTHL1), mRNA.                                                                                      |
| golga1    | 0.481 | -2.078 golgi autoantigen, golgin subfamily a, 1 (GOLGA1), mRNA.                                                                                           |
| c6orf148  | 0.481 | -2.078 chromosome 6 open reading frame 148 (C6orf148), mRNA.                                                                                              |
| usp24     | 0.481 | -2.078 PREDICTED: ubiquitin specific peptidase 24, transcript variant 6 (USP24), mRNA.                                                                    |
| cep63     | 0.481 | -2.079 centrosomal protein 63kDa (CEP63), transcript variant 2, mRNA.                                                                                     |
| rpl11     | 0.481 | -2.079 ribosomal protein L11 (RPL11), mRNA.                                                                                                               |
| rbm17     | 0.481 | -2.079 RNA binding motif protein 17 (RBM17), mRNA.                                                                                                        |
| smyd3     | 0.481 | -2.079 SET and MYND domain containing 3 (SMYD3), mRNA.                                                                                                    |
| rad51c    | 0.481 | -2.08 RAD51 homolog C ( <i>S. cerevisiae</i> ) (RAD51C), transcript variant 1, mRNA.                                                                      |
| mrpl51    | 0.481 | -2.08 mitochondrial ribosomal protein L51 (MRPL51), nuclear gene encoding mitochondrial protein, mRNA.                                                    |
| trpm4     | 0.481 | -2.08 transient receptor potential cation channel, subfamily M, member 4 (TRPM4), mRNA.                                                                   |
| nenf      | 0.481 | -2.08 neuron derived neurotrophic factor (NENF), mRNA.                                                                                                    |
| mgc11257  | 0.481 | -2.08 hypothetical protein MGC11257 (MGC11257), mRNA.                                                                                                     |
| ids       | 0.481 | -2.08 iduronate 2-sulfatase (Hunter syndrome) (IDS), transcript variant 2, mRNA.                                                                          |
| mrpl55    | 0.481 | -2.08 mitochondrial ribosomal protein L55 (MRPL55), nuclear gene encoding mitochondrial protein, transcript variant 5, mRNA.                              |
| cntrob    | 0.481 | -2.08 centrobilin, centrosomal BRCA2 interacting protein (CNTROB), transcript variant 1, mRNA.                                                            |
| smarca4   | 0.481 | -2.08 SWI/SNF related, matrix associated, actin dependent regulator of chromatin, subfamily a, member 4 (SMARCA4), mRNA.                                  |
| loc284393 | 0.481 | -2.081 PREDICTED: similar to ribosomal protein L10, transcript variant 1 (LOC284393), mRNA.                                                               |
| acp6      | 0.481 | -2.081 acid phosphatase 6, lysophosphatidic (ACP6), mRNA.                                                                                                 |
| lgmn      | 0.481 | -2.081 legumain (LGMN), transcript variant 1, mRNA.                                                                                                       |
| c1orf50   | 0.481 | -2.081 chromosome 1 open reading frame 50 (C1orf50), mRNA.                                                                                                |
| tmed5     | 0.48  | -2.081 transmembrane emp24 protein transport domain containing 5 (TMED5), mRNA.                                                                           |
| gemin4    | 0.48  | -2.081 gem (nuclear organelle) associated protein 4 (GEMIN4), mRNA.                                                                                       |
| ercc3     | 0.48  | -2.082 excision repair cross-complementing rodent repair deficiency, complementation group 3 (xeroderma pigmentosum group B complementing) (ERCC3), mRNA. |
| srpk2     | 0.48  | -2.082 SFRS protein kinase 2 (SRPK2), transcript variant 2, mRNA.                                                                                         |
| pcid1     | 0.48  | -2.082 eukaryotic translation initiation factor 3, subunit M (EIF3M), mRNA.                                                                               |
| cdc23     | 0.48  | -2.082 CDC23 (cell division cycle 23, yeast, homolog) (CDC23), mRNA.                                                                                      |
| hccs      | 0.48  | -2.082 holocytochrome c synthase (cytochrome c heme-lyase) (HCCS), mRNA.                                                                                  |
| dnaptf6   | 0.48  | -2.082 DNA polymerase-transactivated protein 6 (DNAPT6), mRNA.                                                                                            |
| mask      | 0.48  | -2.082 Mst3 and SOK1-related kinase (MASK), mRNA.                                                                                                         |
| nmb       | 0.48  | -2.082 neuromedin B (NMB), transcript variant 1, mRNA.                                                                                                    |
| itm2c     | 0.48  | -2.082 integral membrane protein 2C (ITM2C), transcript variant 2, mRNA.                                                                                  |
| cep164    | 0.48  | -2.082 centrosomal protein 164kDa (CEP164), mRNA.                                                                                                         |
| arv1      | 0.48  | -2.082 ARV1 homolog ( <i>S. cerevisiae</i> ) (ARV1), mRNA.                                                                                                |
| pdc61p    | 0.48  | -2.083 programmed cell death 6 interacting protein (PDC61P), mRNA.                                                                                        |
| rnaseh2a  | 0.48  | -2.083 ribonuclease H2, subunit A (RNASEH2A), mRNA.                                                                                                       |
| loc653974 | 0.48  | -2.083 PREDICTED: similar to ribosomal protein L15, transcript variant 3 (LOC653974), mRNA.                                                               |
| h2afz     | 0.48  | -2.084 H2A histone family, member Z (H2AFZ), mRNA.                                                                                                        |
| dhrsx     | 0.48  | -2.084 dehydrogenase/reductase (SDR family) X-linked (DHRSX), mRNA.                                                                                       |

|           |       |                                                                                                                                                                                                                         |
|-----------|-------|-------------------------------------------------------------------------------------------------------------------------------------------------------------------------------------------------------------------------|
| wwp1      | 0.48  | -2.084 WW domain containing E3 ubiquitin protein ligase 1 (WWP1), mRNA.                                                                                                                                                 |
| pros1     | 0.48  | -2.084 protein S (alpha) (PROS1), mRNA.                                                                                                                                                                                 |
| sec611    | 0.48  | -2.084 SEC6-like 1 ( <i>S. cerevisiae</i> ) (SEC6L1), mRNA.                                                                                                                                                             |
| nsun5b    | 0.48  | -2.085 NOL1/NOP2/Sun domain family, member 5B (NSUN5B), transcript variant 2, mRNA.                                                                                                                                     |
| crk       | 0.48  | -2.085 v-crk sarcoma virus CT10 oncogene homolog (avian) (CRK), transcript variant II, mRNA.                                                                                                                            |
| diaph1    | 0.48  | -2.085 diaphanous homolog 1 ( <i>Drosophila</i> ) (DIAPH1), transcript variant 1, mRNA.                                                                                                                                 |
| hsa14     | 0.48  | -2.085 heat shock 70kDa protein 14 (HSPA14), mRNA.                                                                                                                                                                      |
| rpap1     | 0.48  | -2.085 RNA polymerase II associated protein 1 (RPAP1), mRNA.                                                                                                                                                            |
| timm22    | 0.48  | -2.086 translocase of inner mitochondrial membrane 22 homolog (yeast) (TIMM22), mRNA.                                                                                                                                   |
| pcnt2     | 0.479 | -2.086 pericentrin 2 (kendrin) (PCNT2), mRNA.                                                                                                                                                                           |
| ranbp6    | 0.479 | -2.086 RAN binding protein 6 (RANBP6), mRNA.                                                                                                                                                                            |
| flj25476  | 0.479 | -2.086 FLJ25476 protein (FLJ25476), mRNA.                                                                                                                                                                               |
| flj90652  | 0.479 | -2.086 coiled-coil domain containing 95 (CCDC95), mRNA.                                                                                                                                                                 |
| sepx1     | 0.479 | -2.087 selenoprotein X, 1 (SEPX1), mRNA.                                                                                                                                                                                |
| loc643657 | 0.479 | -2.087 PREDICTED: similar to Nonhistone chromosomal protein HMG-17 (High-mobility group nucleosome binding domain 2) (LOC643657), mRNA.                                                                                 |
| tchp      | 0.479 | -2.087 trichoplein, keratin filament binding (TCHP), mRNA.                                                                                                                                                              |
| iscu      | 0.479 | -2.087 iron-sulfur cluster scaffold homolog ( <i>E. coli</i> ) (ISCU), nuclear gene encoding mitochondrial protein, transcript variant 2, mRNA                                                                          |
| c14orf124 | 0.479 | -2.087 chromosome 14 open reading frame 124 (C14orf124), mRNA.                                                                                                                                                          |
| galm      | 0.479 | -2.087 galactose mutarotase (aldose 1-epimerase) (GALM), mRNA.                                                                                                                                                          |
| fhl2      | 0.479 | -2.087 four and a half LIM domains 2 (FHL2), transcript variant 4, mRNA.                                                                                                                                                |
| pole4     | 0.479 | -2.087 polymerase (DNA-directed), epsilon 4 (p12 subunit) (POLE4), mRNA.                                                                                                                                                |
| mrpl43    | 0.479 | -2.087 mitochondrial ribosomal protein L43 (MRPL43), nuclear gene encoding mitochondrial protein, transcript variant 4, mRNA.                                                                                           |
| c16orf80  | 0.479 | -2.088 chromosome 16 open reading frame 80 (C16orf80), mRNA.                                                                                                                                                            |
| lancl2    | 0.479 | -2.088 LanC lantibiotic synthetase component C-like 2 (bacterial) (LANCL2), mRNA.                                                                                                                                       |
| nt5c3     | 0.479 | -2.088 5'-nucleotidase, cytosolic III (NT5C3), transcript variant 3, mRNA.                                                                                                                                              |
| ubqln4    | 0.479 | -2.088 ubiquilin 4 (UBQLN4), mRNA.                                                                                                                                                                                      |
| zdhhc12   | 0.479 | -2.088 zinc finger, DHHC-type containing 12 (ZDHHC12), mRNA.                                                                                                                                                            |
| wdr26     | 0.479 | -2.088 WD repeat domain 26 (WDR26), mRNA.                                                                                                                                                                               |
| rragd     | 0.479 | -2.088 Ras-related GTP binding D (RRAGD), mRNA.                                                                                                                                                                         |
| tmem115   | 0.479 | -2.088 transmembrane protein 115 (TMEM115), mRNA.                                                                                                                                                                       |
| rnf44     | 0.479 | -2.088 ring finger protein 44 (RNF44), mRNA.                                                                                                                                                                            |
| loc647727 | 0.479 | -2.088 PREDICTED: similar to Heterogeneous nuclear ribonucleoprotein A1 (Helix-destabilizing protein) (Single-strand binding protein)(hnRNP core protein A1)(HDP-1)(Topoisomerase-inhibitor suppressed)(LOC647727),mRNA |
| cdk9      | 0.479 | -2.088 cyclin-dependent kinase 9 (CDC2-related kinase) (CDK9), mRNA.                                                                                                                                                    |
| c21orf45  | 0.479 | -2.089 chromosome 21 open reading frame 45 (C21orf45), mRNA.                                                                                                                                                            |
| ptprm     | 0.479 | -2.09 protein tyrosine phosphatase, receptor type, M (PTPRM), mRNA.                                                                                                                                                     |
| dhx38     | 0.479 | -2.09 DEAH (Asp-Glu-Ala-His) box polypeptide 38 (DHX38), mRNA.                                                                                                                                                          |
| ruvbl2    | 0.478 | -2.09 RuvB-like 2 ( <i>E. coli</i> ) (RUVBL2), mRNA.                                                                                                                                                                    |
| loc198437 | 0.478 | -2.09 bA299N6.3 (LOC198437), mRNA.                                                                                                                                                                                      |

|           |       |        |                                                                                                                                                                              |
|-----------|-------|--------|------------------------------------------------------------------------------------------------------------------------------------------------------------------------------|
| loc647389 | 0.478 | -2.09  | PREDICTED: hypothetical protein LOC647389 (LOC647389), mRNA.                                                                                                                 |
| ap4e1     | 0.478 | -2.09  | adaptor-related protein complex 4, epsilon 1 subunit (AP4E1), mRNA.                                                                                                          |
| tegt      | 0.478 | -2.09  | testis enhanced gene transcript (BAX inhibitor 1) (TEGT), mRNA.                                                                                                              |
| loc643284 | 0.478 | -2.09  | PREDICTED: similar to 40S ribosomal protein S29 (LOC643284), mRNA.                                                                                                           |
| fkbp11    | 0.478 | -2.091 | FK506 binding protein 11, 19 kDa (FKBP11), mRNA.                                                                                                                             |
| sfn       | 0.478 | -2.091 | stratifin (SFN), mRNA.                                                                                                                                                       |
| galgt     | 0.478 | -2.091 | UDP-N-acetyl-alpha-D-galactosamine:(N-acetylneuraminy)- galactosylglucosylceramide N-acetylgalactosaminyltransferase (GalNAc-T) (GALGT), mRNA.                               |
| nup188    | 0.478 | -2.091 | nucleoporin 188kDa (NUP188), mRNA.                                                                                                                                           |
| pctp      | 0.478 | -2.091 | phosphatidylcholine transfer protein (PCTP), mRNA.                                                                                                                           |
| kiaa0179  | 0.478 | -2.092 | KIAA0179 (KIAA0179), mRNA.                                                                                                                                                   |
| rwdd4a    | 0.478 | -2.092 | RWD domain containing 4A (RWDD4A), mRNA.                                                                                                                                     |
| loc221955 | 0.478 | -2.092 | diacylglycerol lipase, beta (DAGLB), mRNA.                                                                                                                                   |
| mtmr9     | 0.478 | -2.092 | myotubularin related protein 9 (MTMR9), mRNA.                                                                                                                                |
| ttk       | 0.478 | -2.092 | TTK protein kinase (TTK), mRNA.                                                                                                                                              |
| dus2l     | 0.478 | -2.092 | dihydrouridine synthase 2-like, SMM1 homolog ( <i>S. cerevisiae</i> ) (DUS2L), mRNA.                                                                                         |
| pdss1     | 0.478 | -2.092 | prenyl (decaprenyl) diphosphate synthase, subunit 1 (PDSS1), mRNA.                                                                                                           |
| gfod1     | 0.478 | -2.092 | glucose-fructose oxidoreductase domain containing 1 (GFOD1), mRNA.                                                                                                           |
| aadac     | 0.478 | -2.092 | arylacetamide deacetylase (esterase) (AADAC), mRNA.                                                                                                                          |
| loc651894 | 0.478 | -2.092 | PREDICTED: similar to ribosomal protein S12 (LOC651894), mRNA.                                                                                                               |
| tmed10p   | 0.478 | -2.093 | transmembrane emp24-like trafficking protein 10 (yeast) pseudogene (TMED10P) on chromosome 8.                                                                                |
| nptn      | 0.478 | -2.093 | neuroplastin (NPTN), transcript variant alpha, mRNA.                                                                                                                         |
| eif3s2    | 0.478 | -2.093 | eukaryotic translation initiation factor 3, subunit 2 beta, 36kDa (EIF3S2), mRNA.                                                                                            |
| twsg1     | 0.478 | -2.093 | twisted gastrulation homolog 1 ( <i>Drosophila</i> ) (TWSG1), mRNA.                                                                                                          |
| ppp1r3e   | 0.478 | -2.093 | PREDICTED: protein phosphatase 1, regulatory (inhibitor) subunit 3E (PPP1R3E), mRNA.                                                                                         |
| wdr39     | 0.478 | -2.093 | WD repeat domain 39 (WDR39), mRNA.                                                                                                                                           |
| ptprk     | 0.478 | -2.093 | protein tyrosine phosphatase, receptor type, K (PTPRK), mRNA.                                                                                                                |
| loc646786 | 0.478 | -2.093 | PREDICTED: similar to Afadin (AF-6 protein) (LOC646786), mRNA.                                                                                                               |
| oxa1l     | 0.478 | -2.094 | oxidase (cytochrome c) assembly 1-like (OXA1L), mRNA.                                                                                                                        |
| ppp2r2a   | 0.478 | -2.094 | protein phosphatase 2 (formerly 2A), regulatory subunit B, alpha isoform (PPP2R2A), mRNA.                                                                                    |
| dab2      | 0.478 | -2.094 | disabled homolog 2, mitogen-responsive phosphoprotein ( <i>Drosophila</i> ) (DAB2), mRNA.                                                                                    |
| atp5f1    | 0.477 | -2.094 | ATP synthase, H <sup>+</sup> transporting, mitochondrial F0 complex, subunit b, isoform 1 (ATP5F1), nuclear gene encoding mitochondrial protein, transcript variant 1, mRNA. |
| tnfaip6   | 0.477 | -2.095 | tumor necrosis factor, alpha-induced protein 6 (TNFAIP6), mRNA.                                                                                                              |
| fam44b    | 0.477 | -2.095 | family with sequence similarity 44, member B (FAM44B), mRNA.                                                                                                                 |
| znf621    | 0.477 | -2.095 | zinc finger protein 621 (ZNF621), mRNA.                                                                                                                                      |
| ndufb2    | 0.477 | -2.096 | NADH dehydrogenase (ubiquinone) 1 beta subcomplex, 2, 8kDa (NDUFB2), nuclear gene encoding mitochondrial protein, mRNA.                                                      |
| ptdss1    | 0.477 | -2.096 | phosphatidylserine synthase 1 (PTDSS1), mRNA.                                                                                                                                |
| c12orf52  | 0.477 | -2.096 | chromosome 12 open reading frame 52 (C12orf52), mRNA.                                                                                                                        |
| atg10     | 0.477 | -2.096 | ATG10 autophagy related 10 homolog ( <i>S. cerevisiae</i> ) (ATG10), mRNA.                                                                                                   |
| ilkap     | 0.477 | -2.096 | integrin-linked kinase-associated serine/threonine phosphatase 2C (ILKAP), transcript variant 2, mRNA.                                                                       |

|           |       |        |                                                                                                  |
|-----------|-------|--------|--------------------------------------------------------------------------------------------------|
| c20orf155 | 0.477 | -2.097 | cardiolipin synthase 1 (CRLS1), mRNA.                                                            |
| c14orf2   | 0.477 | -2.097 | chromosome 14 open reading frame 2 (C14orf2), mRNA.                                              |
| dhrs4     | 0.477 | -2.097 | dehydrogenase/reductase (SDR family) member 4 (DHRS4), mRNA.                                     |
| dlg4      | 0.477 | -2.097 | discs, large homolog 4 (Drosophila) (DLG4), mRNA.                                                |
| rpl23ap7  | 0.477 | -2.098 | ribosomal protein L23a pseudogene 7 (RPL23AP7) on chromosome 2.                                  |
| mtpn      | 0.477 | -2.098 | myotrophin (MTPN), mRNA.                                                                         |
| yaf2      | 0.477 | -2.098 | YY1 associated factor 2 (YAF2), transcript variant 2, mRNA.                                      |
| lass5     | 0.477 | -2.098 | LAG1 homolog, ceramide synthase 5 ( <i>S. cerevisiae</i> ) (LASS5), mRNA.                        |
| slc33a1   | 0.477 | -2.098 | solute carrier family 33 (acetyl-CoA transporter), member 1 (SLC33A1), mRNA.                     |
| cstf3     | 0.477 | -2.099 | cleavage stimulation factor, 3' pre-RNA, subunit 3, 77kDa (CSTF3), transcript variant 2, mRNA.   |
| raver1    | 0.477 | -2.099 | RAVER1 (RAVER1), mRNA.                                                                           |
| utp15     | 0.476 | -2.099 | UTP15, U3 small nucleolar ribonucleoprotein, homolog ( <i>S. cerevisiae</i> ) (UTP15), mRNA.     |
| pafah2    | 0.476 | -2.099 | platelet-activating factor acetylhydrolase 2, 40kDa (PAFAH2), mRNA.                              |
| c18orf24  | 0.476 | -2.099 | chromosome 18 open reading frame 24 (C18orf24), mRNA.                                            |
| c4orf14   | 0.476 | -2.099 | chromosome 4 open reading frame 14 (C4orf14), mRNA.                                              |
| ggh       | 0.476 | -2.1   | gamma-glutamyl hydrolase (conjugase, folylpolygammaglutamyl hydrolase) (GGH), mRNA.              |
| dedd      | 0.476 | -2.1   | death effector domain containing (DEDD), transcript variant 2, mRNA.                             |
| mgc3196   | 0.476 | -2.1   | PREDICTED: hypothetical protein MGC3196 (MGC3196), mRNA.                                         |
| c12orf43  | 0.476 | -2.1   | chromosome 12 open reading frame 43 (C12orf43), mRNA.                                            |
| s100a16   | 0.476 | -2.1   | S100 calcium binding protein A16 (S100A16), mRNA.                                                |
| ergic2    | 0.476 | -2.101 | ERGIC and golgi 2 (ERGIC2), mRNA.                                                                |
| lars      | 0.476 | -2.101 | leucyl-tRNA synthetase (LARS), mRNA.                                                             |
| emd       | 0.476 | -2.101 | emerin (Emery-Dreifuss muscular dystrophy) (EMD), mRNA.                                          |
| plau      | 0.476 | -2.101 | plasminogen activator, urokinase (PLAU), mRNA.                                                   |
| man2a1    | 0.476 | -2.102 | mannosidase, alpha, class 2A, member 1 (MAN2A1), mRNA.                                           |
| afap1l2   | 0.476 | -2.102 | actin filament associated protein 1-like 2 (AFAP1L2), transcript variant 2, mRNA.                |
| map2k4    | 0.476 | -2.102 | mitogen-activated protein kinase kinase 4 (MAP2K4), mRNA.                                        |
| atp9b     | 0.476 | -2.102 | ATPase, Class II, type 9B (ATP9B), mRNA.                                                         |
| ncl       | 0.476 | -2.102 | nucleolin (NCL), mRNA.                                                                           |
| nr1h2     | 0.476 | -2.103 | nuclear receptor subfamily 1, group H, member 2 (NR1H2), mRNA.                                   |
| mrps22    | 0.475 | -2.103 | mitochondrial ribosomal protein S22 (MRPS22), nuclear gene encoding mitochondrial protein, mRNA. |
| paqr5     | 0.475 | -2.104 | progesterin and adipoQ receptor family member V (PAQR5), mRNA.                                   |
| c14orf131 | 0.475 | -2.104 | chromosome 14 open reading frame 131 (C14orf131), mRNA.                                          |
| znf297b   | 0.475 | -2.104 | zinc finger and BTB domain containing 43 (ZBTB43), mRNA.                                         |
| slc9a8    | 0.475 | -2.104 | solute carrier family 9 (sodium/hydrogen exchanger), member 8 (SLC9A8), mRNA.                    |
| ap3b1     | 0.475 | -2.104 | adaptor-related protein complex 3, beta 1 subunit (AP3B1), mRNA.                                 |
| habp4     | 0.475 | -2.104 | hyaluronan binding protein 4 (HABP4), mRNA.                                                      |
| accn3     | 0.475 | -2.104 | amiloride-sensitive cation channel 3 (ACCN3), transcript variant 2, mRNA.                        |
| vps4b     | 0.475 | -2.105 | vacuolar protein sorting 4B (yeast) (VPS4B), mRNA.                                               |
| rps6      | 0.475 | -2.105 | ribosomal protein S6 (RPS6), mRNA.                                                               |
| lamp1     | 0.475 | -2.105 | lysosomal-associated membrane protein 1 (LAMP1), mRNA.                                           |
| rpl21     | 0.475 | -2.105 | ribosomal protein L21 (RPL21), mRNA.                                                             |



|           |       |                                                                                                                                                                           |
|-----------|-------|---------------------------------------------------------------------------------------------------------------------------------------------------------------------------|
| prkaa1    | 0.475 | -2.106 protein kinase, AMP-activated, alpha 1 catalytic subunit (PRKAA1), transcript variant 2, mRNA.                                                                     |
| ahi1      | 0.475 | -2.106 Abelson helper integration site 1 (AHI1), mRNA.                                                                                                                    |
| lama5     | 0.475 | -2.106 laminin, alpha 5 (LAMA5), mRNA.                                                                                                                                    |
| loc648314 | 0.475 | -2.106 PREDICTED: similar to ribosomal protein L4, transcript variant 2 (LOC648314), mRNA.                                                                                |
| gstm2     | 0.475 | -2.106 glutathione S-transferase M2 (muscle) (GSTM2), mRNA.                                                                                                               |
| zdhhc16   | 0.475 | -2.106 zinc finger, DHHC-type containing 16 (ZDHHC16), transcript variant 3, mRNA.                                                                                        |
| loc129285 | 0.475 | -2.106 coiled-coil domain containing 128 (CCDC128), mRNA.                                                                                                                 |
| thyn1     | 0.475 | -2.107 thymocyte nuclear protein 1 (THYN1), transcript variant 2, mRNA.                                                                                                   |
| arl2bp    | 0.475 | -2.107 ADP-ribosylation factor-like 2 binding protein (ARL2BP), mRNA.                                                                                                     |
| atp5j2    | 0.475 | -2.107 ATP synthase, H <sup>+</sup> transporting, mitochondrial F0 complex, subunit F2 (ATP5J2), nuclear gene encoding mitochondrial protein, transcript variant 1, mRNA. |
| actn1     | 0.475 | -2.107 actinin, alpha 1 (ACTN1), mRNA.                                                                                                                                    |
| hdac3     | 0.475 | -2.107 histone deacetylase 3 (HDAC3), mRNA.                                                                                                                               |
| btd       | 0.475 | -2.107 biotinidase (BTD), mRNA.                                                                                                                                           |
| chmp6     | 0.475 | -2.107 chromatin modifying protein 6 (CHMP6), mRNA.                                                                                                                       |
| smarca1   | 0.475 | -2.107 SWI/SNF related, matrix associated, actin dependent regulator of chromatin, subfamily a, member 1 (SMARCA1), transcript variant 1, mRNA.                           |
| loc650495 | 0.475 | -2.107 PREDICTED: hypothetical LOC650495 (LOC650495), mRNA.                                                                                                               |
| vps25     | 0.475 | -2.107 vacuolar protein sorting 25 homolog (S. cerevisiae) (VPS25), mRNA.                                                                                                 |
| ube2l3    | 0.474 | -2.108 ubiquitin-conjugating enzyme E2L 3 (UBE2L3), transcript variant 2, mRNA.                                                                                           |
| cbx6      | 0.474 | -2.108 chromobox homolog 6 (CBX6), mRNA.                                                                                                                                  |
| kiaa0286  | 0.474 | -2.108 KIAA0286 protein (KIAA0286), mRNA.                                                                                                                                 |
| svep1     | 0.474 | -2.108 sushi, von Willebrand factor type A, EGF and pentraxin domain containing 1 (SVEP1), mRNA.                                                                          |
| arfip1    | 0.474 | -2.108 ADP-ribosylation factor interacting protein 1 (arfapin 1) (ARFIP1), transcript variant 1, mRNA.                                                                    |
| pim1      | 0.474 | -2.108 pim-1 oncogene (PIM1), mRNA.                                                                                                                                       |
| ndufa9    | 0.474 | -2.108 NADH dehydrogenase (ubiquinone) 1 alpha subcomplex, 9, 39kDa (NDUFA9), mRNA.                                                                                       |
| klk3      | 0.474 | -2.109 kallikrein-related peptidase 3 (KLK3), transcript variant 6, mRNA.                                                                                                 |
| hist1h2ac | 0.474 | -2.109 histone cluster 1, H2ac (HIST1H2AC), mRNA.                                                                                                                         |
| loc127295 | 0.474 | -2.109 PREDICTED: similar to ribosomal protein L36 (LOC127295), mRNA.                                                                                                     |
| bcas4     | 0.474 | -2.11 breast carcinoma amplified sequence 4 (BCAS4), transcript variant 1, mRNA.                                                                                          |
| raph1     | 0.474 | -2.11 Ras association (RalGDS/AF-6) and pleckstrin homology domains 1 (RAPH1), transcript variant 1, mRNA.                                                                |
| tfrc      | 0.474 | -2.11 transferrin receptor (p90, CD71) (TFRC), mRNA.                                                                                                                      |
| znf669    | 0.474 | -2.11 zinc finger protein 669 (ZNF669), mRNA.                                                                                                                             |
| pnpo      | 0.474 | -2.11 pyridoxine 5'-phosphate oxidase (PNPO), mRNA.                                                                                                                       |
| sco1      | 0.474 | -2.11 SCO cytochrome oxidase deficient homolog 1 (yeast) (SCO1), nuclear gene encoding mitochondrial protein, mRNA                                                        |
| upf2      | 0.474 | -2.111 UPF2 regulator of nonsense transcripts homolog (yeast) (UPF2), transcript variant 1, mRNA.                                                                         |
| adrb2     | 0.474 | -2.111 adrenergic, beta-2-, receptor, surface (ADRB2), mRNA.                                                                                                              |
| ugp2      | 0.474 | -2.111 UDP-glucose pyrophosphorylase 2 (UGP2), transcript variant 2, mRNA.                                                                                                |
| ubl4a     | 0.474 | -2.111 ubiquitin-like 4A (UBL4A), mRNA.                                                                                                                                   |
| m6pr      | 0.474 | -2.111 mannose-6-phosphate receptor (cation dependent) (M6PR), mRNA.                                                                                                      |
| dhx15     | 0.474 | -2.111 DEAH (Asp-Glu-Ala-His) box polypeptide 15 (DHX15), mRNA.                                                                                                           |
| cfb       | 0.473 | -2.112 complement factor D (adipsin) (CFD), mRNA.                                                                                                                         |

|           |       |        |                                                                                                                                              |
|-----------|-------|--------|----------------------------------------------------------------------------------------------------------------------------------------------|
| leo1      | 0.473 | -2.112 | Leo1, Paf1/RNA polymerase II complex component, homolog ( <i>S. cerevisiae</i> ) (LEO1), mRNA.                                               |
| mgc33648  | 0.473 | -2.112 | chromosome 5 open reading frame 35 (C5orf35), mRNA.                                                                                          |
| mgc16385  | 0.473 | -2.112 | hypothetical protein MGC16385 (MGC16385), mRNA.                                                                                              |
| clptm1    | 0.473 | -2.113 | cleft lip and palate associated transmembrane protein 1 (CLPTM1), mRNA.                                                                      |
| wee1      | 0.473 | -2.113 | WEE1 homolog ( <i>S. pombe</i> ) (WEE1), mRNA.                                                                                               |
| slc19a1   | 0.473 | -2.113 | solute carrier family 19 (folate transporter), member 1 (SLC19A1), transcript variant 1, mRNA.                                               |
| rplp2     | 0.473 | -2.113 | ribosomal protein, large, P2 (RPLP2), mRNA.                                                                                                  |
| rbm14     | 0.473 | -2.113 | RNA binding motif protein 14 (RBM14), mRNA.                                                                                                  |
| hsd3b7    | 0.473 | -2.114 | hydroxy-delta-5-steroid dehydrogenase, 3 beta- and steroid delta-isomerase 7 (HSD3B7), mRNA.                                                 |
| cyb5r3    | 0.473 | -2.114 | cytochrome b5 reductase 3 (CYB5R3), transcript variant S, mRNA.                                                                              |
| hs.535360 | 0.473 | -2.114 | cDNA clone IMAGE:6250506                                                                                                                     |
| slt1      | 0.473 | -2.114 | SAFB-like, transcription modulator (SLTM), transcript variant 1, mRNA.                                                                       |
| echs1     | 0.473 | -2.115 | enoyl Coenzyme A hydratase, short chain, 1, mitochondrial (ECHS1), nuclear gene encoding mitochondrial protein, mRNA.                        |
| tspan6    | 0.473 | -2.115 | tetraspanin 6 (TSPAN6), mRNA.                                                                                                                |
| c2orf18   | 0.473 | -2.115 | chromosome 2 open reading frame 18 (C2orf18), mRNA.                                                                                          |
| odz3      | 0.473 | -2.115 | odz, odd Oz/ten-m homolog 3 ( <i>Drosophila</i> ) (ODZ3), mRNA.                                                                              |
| tmem42    | 0.473 | -2.115 | transmembrane protein 42 (TMEM42), mRNA.                                                                                                     |
| hs.40289  | 0.473 | -2.115 | mRNA; cDNA DKFZp686I23208 (from clone DKFZp686I23208)                                                                                        |
| csnk2a2   | 0.473 | -2.115 | casein kinase 2, alpha prime polypeptide (CSNK2A2), mRNA.                                                                                    |
| mycbp2    | 0.473 | -2.115 | MYC binding protein 2 (MYCBP2), mRNA.                                                                                                        |
| samm50    | 0.473 | -2.115 | sorting and assembly machinery component 50 homolog ( <i>S. cerevisiae</i> ) (SAMM50), mRNA.                                                 |
| ube2d4    | 0.473 | -2.116 | ubiquitin-conjugating enzyme E2D 4 (putative) (UBE2D4), mRNA.                                                                                |
| rb1cc1    | 0.473 | -2.116 | RB1-inducible coiled-coil 1 (RB1CC1), mRNA.                                                                                                  |
| rbm5      | 0.473 | -2.116 | RNA binding motif protein 5 (RBM5), mRNA.                                                                                                    |
| dync1li2  | 0.472 | -2.116 | dynein, cytoplasmic 1, light intermediate chain 2 (DYNC1L12), mRNA.                                                                          |
| herc6     | 0.472 | -2.117 | hect domain and RLD 6 (HERC6), transcript variant 4, mRNA.                                                                                   |
| xrcc5     | 0.472 | -2.117 | X-ray repair complementing defective repair in Chinese hamster cells 5 (double-strand-break rejoining; Ku autoantigen, 80kDa) (XRCC5), mRNA. |
| sfxn4     | 0.472 | -2.117 | sideroflexin 4 (SFXN4), transcript variant 2, mRNA.                                                                                          |
| sh3bgrl3  | 0.472 | -2.117 | SH3 domain binding glutamic acid-rich protein like 3 (SH3BGRL3), mRNA.                                                                       |
| aftph     | 0.472 | -2.117 | aftiphilin (AFTPH), transcript variant 2, mRNA.                                                                                              |
| styxl1    | 0.472 | -2.117 | serine/threonine/tyrosine interacting-like 1 (STYXL1), mRNA.                                                                                 |
| loc221710 | 0.472 | -2.117 | PREDICTED: hypothetical protein LOC221710 (LOC221710), mRNA.                                                                                 |
| dhtkd1    | 0.472 | -2.117 | dehydrogenase E1 and transketolase domain containing 1 (DHTKD1), mRNA.                                                                       |
| raxl1     | 0.472 | -2.118 | retina and anterior neural fold homeobox like 1 (RAXL1), mRNA.                                                                               |
| dus3l     | 0.472 | -2.118 | dihydrouridine synthase 3-like ( <i>S. cerevisiae</i> ) (DUS3L), mRNA.                                                                       |
| mcm8      | 0.472 | -2.118 | minichromosome maintenance complex component 8 (MCM8), transcript variant 1, mRNA.                                                           |
| eftud2    | 0.472 | -2.118 | elongation factor Tu GTP binding domain containing 2 (EFTUD2), mRNA.                                                                         |
| hdhd1a    | 0.472 | -2.118 | haloacid dehalogenase-like hydrolase domain containing 1A (HDHD1A), mRNA.                                                                    |
| abc1      | 0.472 | -2.119 | amplified in breast cancer 1 (ABC1), mRNA.                                                                                                   |
| gmpr      | 0.472 | -2.119 | guanine monphosphate synthetase (GMPS), mRNA.                                                                                                |

|           |       |                                                                                                                                                                                                            |
|-----------|-------|------------------------------------------------------------------------------------------------------------------------------------------------------------------------------------------------------------|
| dchs1     | 0.472 | -2.119 dachsous 1 ( <i>Drosophila</i> ) (DCHS1), mRNA.                                                                                                                                                     |
| loc150223 | 0.472 | -2.119 hypothetical protein LOC150223 (LOC150223), transcript variant 2, mRNA.                                                                                                                             |
| hs.535044 | 0.472 | -2.119 PREDICTED: similar to FLJ00290 protein (LOC441310), mRNA                                                                                                                                            |
| mkln1     | 0.472 | -2.119 muskelin 1, intracellular mediator containing kelch motifs (MKLN1), mRNA.                                                                                                                           |
| zmym1     | 0.472 | -2.119 zinc finger, MYM-type 1 (ZMYM1), mRNA.                                                                                                                                                              |
| glyctk    | 0.472 | -2.119 glycerate kinase (GLYCTK), mRNA.                                                                                                                                                                    |
| dock1     | 0.472 | -2.12 dedicator of cytokinesis 1 (DOCK1), mRNA.                                                                                                                                                            |
| atf6      | 0.472 | -2.12 activating transcription factor 6 (ATF6), mRNA.                                                                                                                                                      |
| ankrd38   | 0.472 | -2.12 ankyrin repeat domain 38 (ANKRD38), mRNA.                                                                                                                                                            |
| metrn     | 0.472 | -2.12 meteorin, glial cell differentiation regulator (METRN), mRNA.                                                                                                                                        |
| spats2    | 0.472 | -2.12 spermatogenesis associated, serine-rich 2 (SPATS2), mRNA.                                                                                                                                            |
| bok       | 0.472 | -2.12 BCL2-related ovarian killer (BOK), mRNA.                                                                                                                                                             |
| c1orf48   | 0.472 | -2.121 chromosome 1 open reading frame 48 (C1orf48), mRNA.                                                                                                                                                 |
| pkm2      | 0.471 | -2.121 pyruvate kinase, muscle (PKM2), transcript variant 1, mRNA.                                                                                                                                         |
| srp46     | 0.471 | -2.122 Splicing factor, arginine/serine-rich, 46kD (SRP46), mRNA.                                                                                                                                          |
| mgc12981  | 0.471 | -2.122 coiled-coil domain containing 115 (CCDC115), mRNA.                                                                                                                                                  |
| arhgef19  | 0.471 | -2.122 Rho guanine nucleotide exchange factor (GEF) 19 (ARHGEF19), mRNA.                                                                                                                                   |
| abcc4     | 0.471 | -2.122 ATP-binding cassette, sub-family C (CFTR/MRP), member 4 (ABCC4), mRNA.                                                                                                                              |
| loc644979 | 0.471 | -2.122 PREDICTED: hypothetical LOC644979 (LOC644979), mRNA.                                                                                                                                                |
| chchd1    | 0.471 | -2.122 coiled-coil-helix-coiled-coil-helix domain containing 1 (CHCHD1), mRNA.                                                                                                                             |
| cdc2l6    | 0.471 | -2.122 cell division cycle 2-like 6 (CDK8-like) (CDC2L6), mRNA.                                                                                                                                            |
| loc646630 | 0.471 | -2.123 PREDICTED: similar to Coiled-coil-helix-coiled-coil-helix domain containing protein 2 (HCV NS2 trans-regulated protein) (NS2TP) (LOC646630), mRNA.                                                  |
| hs.485155 | 0.471 | -2.123 cDNA: FLJ22515 fis, clone HRC12122, highly similar to AF052101 Homo sapiens clone 23872 mRNA sequence                                                                                               |
| flj45557  | 0.471 | -2.123 hypothetical protein LOC642938 (FLJ45557), mRNA.                                                                                                                                                    |
| psmc3     | 0.471 | -2.123 proteasome (prosome, macropain) 26S subunit, ATPase, 3 (PSMC3), mRNA.                                                                                                                               |
| chst10    | 0.471 | -2.123 carbohydrate sulfotransferase 10 (CHST10), mRNA.                                                                                                                                                    |
| agr2      | 0.471 | -2.123 anterior gradient homolog 2 ( <i>Xenopus laevis</i> ) (AGR2), mRNA.                                                                                                                                 |
| pro0149   | 0.471 | -2.123 chromosome 16 open reading frame 72 (C16orf72), mRNA.                                                                                                                                               |
| otub2     | 0.471 | -2.123 OTU domain, ubiquitin aldehyde binding 2 (OTUB2), mRNA.                                                                                                                                             |
| cyp20a1   | 0.471 | -2.123 cytochrome P450, family 20, subfamily A, polypeptide 1 (CYP20A1), transcript variant 1, mRNA.                                                                                                       |
| loc652846 | 0.471 | -2.124 PREDICTED: similar to Annexin A8 (Annexin VIII) (Vascular anticoagulant-beta) (VAC-beta) (LOC652846), mRNA.                                                                                         |
| entpd6    | 0.471 | -2.124 ectonucleoside triphosphate diphosphohydrolase 6 (putative function) (ENTPD6), mRNA.                                                                                                                |
| prdx4     | 0.471 | -2.124 peroxiredoxin 4 (PRDX4), mRNA.                                                                                                                                                                      |
| stip1     | 0.471 | -2.124 stress-induced-phosphoprotein 1 (Hsp70/Hsp90-organizing protein) (STIP1), mRNA.                                                                                                                     |
| fam38a    | 0.471 | -2.124 family with sequence similarity 38, member A (FAM38A), mRNA.                                                                                                                                        |
| npip      | 0.471 | -2.124 nuclear pore complex interacting protein (NPIP), mRNA.                                                                                                                                              |
| tmem29    | 0.471 | -2.124 transmembrane protein 29 (TMEM29), mRNA.                                                                                                                                                            |
| rnaseh1   | 0.471 | -2.125 ribonuclease H1 (RNASEH1), mRNA.                                                                                                                                                                    |
| fcrlm2    | 0.471 | -2.125 Fc receptor-like B (FCRLB), mRNA.                                                                                                                                                                   |
| loc648210 | 0.471 | -2.125 PREDICTED: similar to Heterogeneous nuclear ribonucleoprotein A1 (Helix-destabilizing protein) (Single-strand binding protein) (hnRNP core protein A1) (HDP-1) (Topoisomerase-inhibitor suppressed) |

, transcript variant 1 (LOC648210), mRNA.

|           |       |        |                                                                                                                                   |
|-----------|-------|--------|-----------------------------------------------------------------------------------------------------------------------------------|
| hs.22907  | 0.471 | -2.125 | mRNA; cDNA DKFZp686P0492 (from clone DKFZp686P0492)                                                                               |
| saps3     | 0.471 | -2.125 | SAPS domain family, member 3 (SAPS3), mRNA.                                                                                       |
| evc       | 0.471 | -2.125 | Ellis van Creveld syndrome (EVC), transcript variant 2, mRNA.                                                                     |
| brms1l    | 0.471 | -2.125 | breast cancer metastasis-suppressor 1-like (BRMS1L), mRNA.                                                                        |
| tmsb10    | 0.471 | -2.125 | thymosin, beta 10 (TMSB10), mRNA.                                                                                                 |
| tspan9    | 0.471 | -2.125 | tetraspanin 9 (TSPAN9), mRNA.                                                                                                     |
| slc2a4rg  | 0.471 | -2.125 | SLC2A4 regulator (SLC2A4RG), mRNA.                                                                                                |
| pin1      | 0.47  | -2.126 | protein (peptidylprolyl cis/trans isomerase) NIMA-interacting 1 (PIN1), mRNA.                                                     |
| rtcd1     | 0.47  | -2.126 | RNA terminal phosphate cyclase domain 1 (RTCD1), mRNA.                                                                            |
| znf419    | 0.47  | -2.126 | zinc finger protein 419 (ZNF419), mRNA.                                                                                           |
| kif18a    | 0.47  | -2.126 | kinesin family member 18A (KIF18A), mRNA.                                                                                         |
| rps13     | 0.47  | -2.127 | ribosomal protein S13 (RPS13), mRNA.                                                                                              |
| exosc7    | 0.47  | -2.127 | exosome component 7 (EXOSC7), mRNA.                                                                                               |
| pepd      | 0.47  | -2.127 | peptidase D (PEPD), mRNA.                                                                                                         |
| gnb1l     | 0.47  | -2.127 | guanine nucleotide binding protein (G protein), beta polypeptide 1-like (GNB1L), mRNA.                                            |
| sec24c    | 0.47  | -2.128 | SEC24 related gene family, member C ( <i>S. cerevisiae</i> ) (SEC24C), transcript variant 1, mRNA.                                |
| et        | 0.47  | -2.128 | major facilitator superfamily domain containing 11 (MFSD11), mRNA.                                                                |
| c1orf123  | 0.47  | -2.128 | chromosome 1 open reading frame 123 (C1orf123), mRNA.                                                                             |
| loc338758 | 0.47  | -2.128 | PREDICTED: hypothetical protein LOC338758 (LOC338758), mRNA.                                                                      |
| rpl3      | 0.47  | -2.128 | ribosomal protein L3 (RPL3), transcript variant 2, mRNA.                                                                          |
| tuba1     | 0.47  | -2.129 | tubulin, alpha 4a (TUBA4A), mRNA.                                                                                                 |
| mimitin   | 0.47  | -2.129 | NDUFA12-like (NDUFA12L), mRNA.                                                                                                    |
| gcat      | 0.47  | -2.129 | glycine C-acetyltransferase (2-amino-3-ketobutyrate coenzyme A ligase) (GCAT), nuclear gene encoding mitochondrial protein, mRNA. |
| cd2ap     | 0.47  | -2.129 | CD2-associated protein (CD2AP), mRNA.                                                                                             |
| gamt      | 0.47  | -2.13  | guanidinoacetate N-methyltransferase (GAMT), transcript variant 1, mRNA.                                                          |
| lysmd2    | 0.469 | -2.13  | LysM, putative peptidoglycan-binding, domain containing 2 (LYSMD2), mRNA.                                                         |
| polr2l    | 0.469 | -2.13  | polymerase (RNA) II (DNA directed) polypeptide L, 7.6kDa (POLR2L), mRNA.                                                          |
| tmem183b  | 0.469 | -2.13  | transmembrane protein 183B (TMEM183B), mRNA.                                                                                      |
| loc643319 | 0.469 | -2.13  | PREDICTED: similar to Transgelin-2 (LOC643319), mRNA.                                                                             |
| hs.134650 | 0.469 | -2.131 | AGENCOURT_13567612 NIH_MGC_184 cDNA clone IMAGE:30326575 5, mRNA sequence                                                         |
| dlnb14    | 0.469 | -2.131 | coiled-coil domain containing 84 (CCDC84), mRNA.                                                                                  |
| fam96b    | 0.469 | -2.131 | family with sequence similarity 96, member B (FAM96B), mRNA.                                                                      |
| kpnb1     | 0.469 | -2.131 | karyopherin (importin) beta 1 (KPNB1), mRNA.                                                                                      |
| atp6v1e2  | 0.469 | -2.132 | ATPase, H <sup>+</sup> transporting, lysosomal 31kDa, V1 subunit E2 (ATP6V1E2), mRNA.                                             |
| rab1b     | 0.469 | -2.132 | RAB1B, member RAS oncogene family (RAB1B), mRNA.                                                                                  |
| stard7    | 0.469 | -2.132 | START domain containing 7 (STARD7), transcript variant 1, mRNA.                                                                   |
| plcx1     | 0.469 | -2.132 | phosphatidylinositol-specific phospholipase C, X domain containing 1 (PLCX1), mRNA.                                               |
| praf2     | 0.469 | -2.132 | PRA1 domain family, member 2 (PRAF2), mRNA.                                                                                       |
| polr1e    | 0.469 | -2.132 | polymerase (RNA) I polypeptide E, 53kDa (POLR1E), mRNA.                                                                           |
| ccs       | 0.469 | -2.132 | PREDICTED: copper chaperone for superoxide dismutase (CCS), mRNA.                                                                 |

|           |       |        |                                                                                                                                                                                                                                                  |
|-----------|-------|--------|--------------------------------------------------------------------------------------------------------------------------------------------------------------------------------------------------------------------------------------------------|
| loc148915 | 0.469 | -2.133 | PREDICTED: similar to Nonhistone chromosomal protein HMG-17 (High-mobility group nucleosome binding domain 2) (LOC148915), mRNA.                                                                                                                 |
| loc440567 | 0.469 | -2.133 | PREDICTED: similar to Ubiquinol-cytochrome c reductase complex 11 kDa protein, mitochondrial precursor (Mitochondrial hinge protein) (Cytochrome C1, nonheme 11 kDa protein) (Complex III subunit VIII), transcript variant 3 (LOC440567), mRNA. |
| slc39a3   | 0.469 | -2.133 | solute carrier family 39 (zinc transporter), member 3 (SLC39A3), transcript variant 2, mRNA.                                                                                                                                                     |
| fkrp      | 0.469 | -2.133 | fukutin related protein (FKRP), mRNA.                                                                                                                                                                                                            |
| mta2      | 0.469 | -2.133 | metastasis associated 1 family, member 2 (MTA2), mRNA.                                                                                                                                                                                           |
| gpd1l     | 0.469 | -2.133 | glycerol-3-phosphate dehydrogenase 1-like (GPD1L), mRNA.                                                                                                                                                                                         |
| lactb     | 0.469 | -2.133 | lactamase, beta (LACTB), nuclear gene encoding mitochondrial protein, transcript variant 2, mRNA.                                                                                                                                                |
| camk2n1   | 0.469 | -2.134 | calcium/calmodulin-dependent protein kinase II inhibitor 1 (CAMK2N1), mRNA.                                                                                                                                                                      |
| itgb4bp   | 0.469 | -2.134 | integrin beta 4 binding protein (ITGB4BP), transcript variant 3, mRNA.                                                                                                                                                                           |
| usp8      | 0.469 | -2.134 | ubiquitin specific peptidase 8 (USP8), mRNA.                                                                                                                                                                                                     |
| 11-Sep    | 0.469 | -2.134 | septin 11 (SEPT11), mRNA.                                                                                                                                                                                                                        |
| stambp    | 0.469 | -2.134 | STAM binding protein (STAMPB), transcript variant 1, mRNA.                                                                                                                                                                                       |
| mocos     | 0.469 | -2.134 | molybdenum cofactor sulfurase (MOCOS), mRNA.                                                                                                                                                                                                     |
| dynlt1    | 0.469 | -2.134 | dynein, light chain, Tctex-type 1 (DYNLT1), mRNA.                                                                                                                                                                                                |
| slc44a1   | 0.468 | -2.135 | solute carrier family 44, member 1 (SLC44A1), transcript variant 1, mRNA.                                                                                                                                                                        |
| gnpda1    | 0.468 | -2.135 | glucosamine-6-phosphate deaminase 1 (GNPDA1), mRNA.                                                                                                                                                                                              |
| loc654194 | 0.468 | -2.135 | PREDICTED: similar to ribosomal protein S27 (LOC654194), mRNA.                                                                                                                                                                                   |
| osbpl1a   | 0.468 | -2.135 | oxysterol binding protein-like 1A (OSBPL1A), transcript variant OSBPL1B, mRNA.                                                                                                                                                                   |
| vps37a    | 0.468 | -2.135 | vacuolar protein sorting 37 homolog A ( <i>S. cerevisiae</i> ) (VPS37A), mRNA.                                                                                                                                                                   |
| adh5      | 0.468 | -2.135 | alcohol dehydrogenase 5 (class III), chi polypeptide (ADH5), mRNA.                                                                                                                                                                               |
| hist2h4a  | 0.468 | -2.135 | histone cluster 2, H4a (HIST2H4A), mRNA.                                                                                                                                                                                                         |
| hoxc9     | 0.468 | -2.135 | homeobox C9 (HOXC9), mRNA.                                                                                                                                                                                                                       |
| mta3      | 0.468 | -2.135 | metastasis associated 1 family, member 3 (MTA3), mRNA.                                                                                                                                                                                           |
| kiaa1212  | 0.468 | -2.135 | coiled-coil domain containing 88A (CCDC88A), mRNA.                                                                                                                                                                                               |
| b3gat3    | 0.468 | -2.136 | beta-1,3-glucuronyltransferase 3 (glucuronosyltransferase I) (B3GAT3), mRNA.                                                                                                                                                                     |
| armcx5    | 0.468 | -2.136 | armadillo repeat containing, X-linked 5 (ARMCX5), mRNA.                                                                                                                                                                                          |
| flj39827  | 0.468 | -2.136 | hypothetical protein FLJ39827 (FLJ39827), mRNA.                                                                                                                                                                                                  |
| loc653506 | 0.468 | -2.136 | PREDICTED: similar to meteorin, glial cell differentiation regulator-like (LOC653506), mRNA.                                                                                                                                                     |
| polr3a    | 0.468 | -2.136 | polymerase (RNA) III (DNA directed) polypeptide A, 155kDa (POLR3A), mRNA.                                                                                                                                                                        |
| btf3l4    | 0.468 | -2.136 | basic transcription factor 3-like 4 (BTF3L4), mRNA.                                                                                                                                                                                              |
| gng5      | 0.468 | -2.136 | guanine nucleotide binding protein (G protein), gamma 5 (GNG5), mRNA.                                                                                                                                                                            |
| c3orf10   | 0.468 | -2.136 | chromosome 3 open reading frame 10 (C3orf10), mRNA.                                                                                                                                                                                              |
| loc642395 | 0.468 | -2.136 | PREDICTED: similar to paraspeckle protein 1, transcript variant 2 (LOC642395), mRNA.                                                                                                                                                             |
| mosc2     | 0.468 | -2.137 | MOCO sulphurase C-terminal domain containing 2 (MOSC2), mRNA.                                                                                                                                                                                    |
| prdm4     | 0.468 | -2.137 | PR domain containing 4 (PRDM4), mRNA.                                                                                                                                                                                                            |
| tex264    | 0.468 | -2.137 | testis expressed 264 (TEX264), mRNA.                                                                                                                                                                                                             |
| pgea1     | 0.468 | -2.137 | chibby homolog 1 ( <i>Drosophila</i> ) (CBY1), transcript variant 2, mRNA.                                                                                                                                                                       |
| loc441408 | 0.468 | -2.137 | PREDICTED: hypothetical LOC441408, transcript variant 2 (LOC441408), mRNA.                                                                                                                                                                       |
| tef       | 0.468 | -2.137 | thyrotrophic embryonic factor (TEF), mRNA.                                                                                                                                                                                                       |

|             |       |                                                                                                                                                     |
|-------------|-------|-----------------------------------------------------------------------------------------------------------------------------------------------------|
| mgc34830    | 0.468 | -2.137 chromosome 11 open reading frame 69 (C11orf69), mRNA.                                                                                        |
| znf403      | 0.468 | -2.138 zinc finger protein 403 (ZNF403), mRNA.                                                                                                      |
| zfp91       | 0.468 | -2.138 zinc finger protein 91 homolog (mouse) (ZFP91), transcript variant 2, mRNA.                                                                  |
| dkfzp434b03 | 0.468 | -2.138 DKFZP434B0335 protein (DKFZP434B0335), mRNA.                                                                                                 |
| inpp5e      | 0.468 | -2.138 inositol polyphosphate-5-phosphatase, 72 kDa (INPP5E), mRNA.                                                                                 |
| c14orf58    | 0.468 | -2.138 feline leukemia virus subgroup C cellular receptor family, member 2 (FLVCR2), mRNA.                                                          |
| pdlim7      | 0.468 | -2.138 PDZ and LIM domain 7 (enigma) (PDLIM7), transcript variant 4, mRNA.                                                                          |
| lima1       | 0.468 | -2.139 LIM domain and actin binding 1 (LIMA1), mRNA.                                                                                                |
| map2k1ip1   | 0.468 | -2.139 mitogen-activated protein kinase kinase 1 interacting protein 1 (MAP2K1IP1), mRNA.                                                           |
| phkb        | 0.467 | -2.139 phosphorylase kinase, beta (PHKB), transcript variant 2, mRNA.                                                                               |
| trg20       | 0.467 | -2.14 mediator complex subunit 10 (MED10), mRNA.                                                                                                    |
| egl1        | 0.467 | -2.14 egl nine homolog 1 (C. elegans) (EGLN1), mRNA.                                                                                                |
| dock11      | 0.467 | -2.14 dedicator of cytokinesis 11 (DOCK11), mRNA.                                                                                                   |
| polq        | 0.467 | -2.14 polymerase (DNA directed), theta (POLQ), mRNA.                                                                                                |
| skp2        | 0.467 | -2.14 S-phase kinase-associated protein 2 (p45) (SKP2), transcript variant 1, mRNA.                                                                 |
| pde4b       | 0.467 | -2.14 phosphodiesterase 4B, cAMP-specific (phosphodiesterase E4 dunce homolog, Drosophila) (PDE4B), transcript variant d, mRNA.                     |
| klhl24      | 0.467 | -2.14 kelch-like 24 (Drosophila) (KLHL24), mRNA.                                                                                                    |
| hs.294603   | 0.467 | -2.14 cDNA FLJ12874 fis, clone NT2RP2003769                                                                                                         |
| xpc         | 0.467 | -2.14 xeroderma pigmentosum, complementation group C (XPC), mRNA.                                                                                   |
| loc647673   | 0.467 | -2.141 PREDICTED: similar to Translationally-controlled tumor protein (TCTP) (p23) (Histamine-releasing factor) (HRF) (Fortilin) (LOC647673), mRNA. |
| il6         | 0.467 | -2.141 interleukin 6 (interferon, beta 2) (IL6), mRNA.                                                                                              |
| egfr        | 0.467 | -2.141 epidermal growth factor receptor (erythroblastic leukemia viral (v-erb-b) oncogene homolog, avian) (EGFR), transcript variant 3, mRNA.       |
| psmd3       | 0.467 | -2.141 proteasome (prosome, macropain) 26S subunit, non-ATPase, 3 (PSMD3), mRNA.                                                                    |
| uckl1       | 0.467 | -2.141 uridine-cytidine kinase 1-like 1 (UCKL1), mRNA.                                                                                              |
| ndufs8      | 0.467 | -2.141 NADH dehydrogenase (ubiquinone) Fe-S protein 8, 23kDa (NADH-coenzyme Q reductase) (NDUFS8), mRNA.                                            |
| rab15       | 0.467 | -2.142 RAB15, member RAS oncogene family (RAB15), mRNA.                                                                                             |
| sidt2       | 0.467 | -2.142 SID1 transmembrane family, member 2 (SIDT2), mRNA.                                                                                           |
| elmod2      | 0.467 | -2.142 ELMO/CED-12 domain containing 2 (ELMOD2), mRNA.                                                                                              |
| hs.107418   | 0.467 | -2.142 cDNA FLJ41853 fis, clone NT2RI3004161                                                                                                        |
| mr1         | 0.467 | -2.142 major histocompatibility complex, class I-related (MR1), mRNA.                                                                               |
| znf562      | 0.467 | -2.143 zinc finger protein 562 (ZNF562), mRNA.                                                                                                      |
| loc402116   | 0.467 | -2.143 PREDICTED: similar to plakophilin 4 (LOC402116), mRNA.                                                                                       |
| sh3kbp1     | 0.467 | -2.143 SH3-domain kinase binding protein 1 (SH3KBP1), transcript variant 2, mRNA.                                                                   |
| c13orf3     | 0.467 | -2.143 chromosome 13 open reading frame 3 (C13orf3), mRNA.                                                                                          |
| bc002942    | 0.467 | -2.143 transmembrane protein 112B (TMEM112B), mRNA.                                                                                                 |
| ranbp5      | 0.467 | -2.143 RAN binding protein 5 (RANBP5), mRNA.                                                                                                        |
| cdca8       | 0.467 | -2.143 cell division cycle associated 8 (CDCA8), mRNA.                                                                                              |
| tnks1bp1    | 0.467 | -2.144 tankyrase 1 binding protein 1, 182kDa (TNKS1BP1), mRNA.                                                                                      |
| ddx41       | 0.466 | -2.144 DEAD (Asp-Glu-Ala-Asp) box polypeptide 41 (DDX41), mRNA.                                                                                     |

|           |       |                                                                                                                                                                                                                                          |
|-----------|-------|------------------------------------------------------------------------------------------------------------------------------------------------------------------------------------------------------------------------------------------|
| hs.13262  | 0.466 | -2.144 PREDICTED: hypothetical gene supported by AY007155 (LOC439949), mRNA                                                                                                                                                              |
| c1orf77   | 0.466 | -2.144 chromosome 1 open reading frame 77 (C1orf77), mRNA.                                                                                                                                                                               |
| cart1     | 0.466 | -2.144 cartilage paired-class homeoprotein 1 (CART1), mRNA.                                                                                                                                                                              |
| hs.444290 | 0.466 | -2.144 cDNA FLJ42786 fis, clone BRAWH3006761                                                                                                                                                                                             |
| c1orf53   | 0.466 | -2.144 chromosome 1 open reading frame 53 (C1orf53), mRNA.                                                                                                                                                                               |
| capn2     | 0.466 | -2.144 calpain 2, (m/II) large subunit (CAPN2), mRNA.                                                                                                                                                                                    |
| dnaja2    | 0.466 | -2.145 DnaJ (Hsp40) homolog, subfamily A, member 2 (DNAJA2), mRNA.                                                                                                                                                                       |
| susd2     | 0.466 | -2.145 sushi domain containing 2 (SUSD2), mRNA.                                                                                                                                                                                          |
| kiaa1815  | 0.466 | -2.145 KIAA1815 (KIAA1815), mRNA.                                                                                                                                                                                                        |
| sppl2a    | 0.466 | -2.145 signal peptide peptidase-like 2A (SPPL2A), mRNA.                                                                                                                                                                                  |
| rnf126    | 0.466 | -2.145 ring finger protein 126 (RNF126), mRNA.                                                                                                                                                                                           |
| nars2     | 0.466 | -2.146 asparaginyl-tRNA synthetase 2, mitochondrial (putative) (NARS2), mRNA.                                                                                                                                                            |
| flj20699  | 0.466 | -2.146 hypothetical protein FLJ20699 (FLJ20699), mRNA.                                                                                                                                                                                   |
| gspt2     | 0.466 | -2.146 G1 to S phase transition 2 (GSPT2), mRNA.                                                                                                                                                                                         |
| fam62b    | 0.466 | -2.146 family with sequence similarity 62 (C2 domain containing) member B (FAM62B), mRNA.                                                                                                                                                |
| ap1m2     | 0.466 | -2.147 adaptor-related protein complex 1, mu 2 subunit (AP1M2), mRNA.                                                                                                                                                                    |
| loc440055 | 0.466 | -2.147 PREDICTED: similar to ribosomal protein S12 (LOC440055), mRNA.                                                                                                                                                                    |
| med9      | 0.466 | -2.147 mediator of RNA polymerase II transcription, subunit 9 homolog ( <i>S. cerevisiae</i> ) (MED9), mRNA.                                                                                                                             |
| fam50b    | 0.466 | -2.147 family with sequence similarity 50, member B (FAM50B), mRNA.                                                                                                                                                                      |
| kif3b     | 0.466 | -2.147 kinesin family member 3B (KIF3B), mRNA.                                                                                                                                                                                           |
| scand1    | 0.466 | -2.148 SCAN domain containing 1 (SCAND1), transcript variant 2, mRNA.                                                                                                                                                                    |
| ccdc23    | 0.466 | -2.148 coiled-coil domain containing 23 (CCDC23), mRNA.                                                                                                                                                                                  |
| tpr       | 0.466 | -2.148 translocated promoter region (to activated MET oncogene) (TPR), mRNA.                                                                                                                                                             |
| clasp1    | 0.466 | -2.148 cytoplasmic linker associated protein 1 (CLASP1), mRNA.                                                                                                                                                                           |
| hs.127310 | 0.465 | -2.149 mRNA; cDNA DKFZp434C1613 (from clone DKFZp434C1613)                                                                                                                                                                               |
| asahl     | 0.465 | -2.149 N-acylsphingosine amidohydrolase (acid ceramidase)-like (ASAHL), mRNA.                                                                                                                                                            |
| dpysl3    | 0.465 | -2.149 dihydropyrimidinase-like 3 (DPYSL3), mRNA.                                                                                                                                                                                        |
| psmc3ip   | 0.465 | -2.149 PSMC3 interacting protein (PSMC3IP), transcript variant 2, mRNA.                                                                                                                                                                  |
| mbnl1     | 0.465 | -2.149 muscleblind-like ( <i>Drosophila</i> ) (MBNL1), transcript variant 3, mRNA.                                                                                                                                                       |
| map4      | 0.465 | -2.149 microtubule-associated protein 4 (MAP4), transcript variant 2, mRNA.                                                                                                                                                              |
| kiaa1797  | 0.465 | -2.149 KIAA1797 (KIAA1797), mRNA.                                                                                                                                                                                                        |
| uap1      | 0.465 | -2.149 UDP-N-acteylglucosamine pyrophosphorylase 1 (UAP1), mRNA.                                                                                                                                                                         |
| ptk9l     | 0.465 | -2.149 twinfilin, actin-binding protein, homolog 2 ( <i>Drosophila</i> ) (TWF2), mRNA.                                                                                                                                                   |
| lypla2    | 0.465 | -2.15 lysophospholipase II (LYPLA2), mRNA.                                                                                                                                                                                               |
| f12       | 0.465 | -2.15 coagulation factor XII (Hageman factor) (F12), mRNA.                                                                                                                                                                               |
| loc389672 | 0.465 | -2.15 PREDICTED: similar to 40S ribosomal protein SA (p40) (34/67 kDa laminin receptor) (Colon carcinoma laminin-binding protein) (NEM/1CHD4) (Multidrug resistance-associated protein MGr1-Ag), transcript variant 3 (LOC389672), mRNA. |
| setdb1    | 0.465 | -2.15 SET domain, bifurcated 1 (SETDB1), mRNA.                                                                                                                                                                                           |
| golp3     | 0.465 | -2.15 golgi phosphoprotein 3 (coat-protein) (GOLPH3), mRNA.                                                                                                                                                                              |
| c12orf32  | 0.465 | -2.151 chromosome 12 open reading frame 32 (C12orf32), mRNA.                                                                                                                                                                             |
| ncoa4     | 0.465 | -2.151 nuclear receptor coactivator 4 (NCOA4), mRNA.                                                                                                                                                                                     |

|           |       |                                                                                                                                                                                   |
|-----------|-------|-----------------------------------------------------------------------------------------------------------------------------------------------------------------------------------|
| ebp       | 0.465 | -2.151 emopamil binding protein (sterol isomerase) (EBP), mRNA.                                                                                                                   |
| hs.475334 | 0.465 | -2.151 Human mRNA for KIAA0280 gene, partial cds                                                                                                                                  |
| prickle2  | 0.465 | -2.152 prickle-like 2 (Drosophila) (PRICKLE2), mRNA.                                                                                                                              |
| cxorf53   | 0.465 | -2.152 BRCA1/BRCA2-containing complex, subunit 3 (BRCC3), transcript variant 1, mRNA.                                                                                             |
| prkar2a   | 0.465 | -2.152 protein kinase, cAMP-dependent, regulatory, type II, alpha (PRKAR2A), mRNA.                                                                                                |
| pex14     | 0.465 | -2.152 peroxisomal biogenesis factor 14 (PEX14), mRNA.                                                                                                                            |
| mrpl54    | 0.465 | -2.152 mitochondrial ribosomal protein L54 (MRPL54), nuclear gene encoding mitochondrial protein, mRNA.                                                                           |
| flnb      | 0.464 | -2.153 filamin B, beta (actin binding protein 278) (FLNB), mRNA.                                                                                                                  |
| lrfn4     | 0.464 | -2.153 leucine rich repeat and fibronectin type III domain containing 4 (LRFN4), mRNA.                                                                                            |
| hsd17b8   | 0.464 | -2.153 hydroxysteroid (17-beta) dehydrogenase 8 (HSD17B8), mRNA.                                                                                                                  |
| cherp     | 0.464 | -2.153 calcium homeostasis endoplasmic reticulum protein (CHERP), mRNA.                                                                                                           |
| c16orf33  | 0.464 | -2.154 chromosome 16 open reading frame 33 (C16orf33), mRNA.                                                                                                                      |
| eid3      | 0.464 | -2.154 EP300 interacting inhibitor of differentiation 3 (EID3), mRNA.                                                                                                             |
| gtf2f1    | 0.464 | -2.154 general transcription factor IIF, polypeptide 1, 74kDa (GTF2F1), mRNA.                                                                                                     |
| emp1      | 0.464 | -2.154 epithelial membrane protein 1 (EMP1), mRNA.                                                                                                                                |
| c14orf104 | 0.464 | -2.155 chromosome 14 open reading frame 104 (C14orf104), mRNA.                                                                                                                    |
| znfx1     | 0.464 | -2.155 zinc finger, NFX1-type containing 1 (ZNFX1), mRNA.                                                                                                                         |
| hs.551538 | 0.464 | -2.155 mRNA; cDNA DKFZp761E1721 (from clone DKFZp761E1721)                                                                                                                        |
| kiaa0460  | 0.464 | -2.155 KIAA0460 (KIAA0460), mRNA.                                                                                                                                                 |
| mgc24665  | 0.464 | -2.156 chromosome 16 open reading frame 75 (C16orf75), mRNA.                                                                                                                      |
| hs.430851 | 0.464 | -2.156 ns68e03.y5 NCI_CGAP_Pr2 cDNA clone IMAGE:1188796, mRNA sequence                                                                                                            |
| kiaa0133  | 0.464 | -2.157 KIAA0133 (KIAA0133), mRNA.                                                                                                                                                 |
| gng4      | 0.464 | -2.157 guanine nucleotide binding protein (G protein), gamma 4 (GNG4), mRNA.                                                                                                      |
| mrps5     | 0.464 | -2.157 mitochondrial ribosomal protein S5 (MRPS5), nuclear gene encoding mitochondrial protein, mRNA.                                                                             |
| loc651436 | 0.464 | -2.157 PREDICTED: similar to ribosomal protein L9 (LOC651436), mRNA.                                                                                                              |
| bst1      | 0.464 | -2.157 bone marrow stromal cell antigen 1 (BST1), mRNA.                                                                                                                           |
| icam3     | 0.464 | -2.158 intercellular adhesion molecule 3 (ICAM3), mRNA.                                                                                                                           |
| slc35b4   | 0.463 | -2.158 solute carrier family 35, member B4 (SLC35B4), mRNA.                                                                                                                       |
| gramd3    | 0.463 | -2.158 GRAM domain containing 3 (GRAMD3), mRNA.                                                                                                                                   |
| scap      | 0.463 | -2.158 SREBP cleavage-activating protein (SCAP), mRNA.                                                                                                                            |
| nup153    | 0.463 | -2.158 nucleoporin 153kDa (NUP153), mRNA.                                                                                                                                         |
| hspa12a   | 0.463 | -2.158 PREDICTED: heat shock 70kDa protein 12A, transcript variant 2 (HSPA12A), mRNA.                                                                                             |
| lsm2      | 0.463 | -2.158 LSM2 homolog, U6 small nuclear RNA associated (S. cerevisiae) (LSM2), mRNA.                                                                                                |
| c13orf8   | 0.463 | -2.158 chromosome 13 open reading frame 8 (C13orf8), mRNA.                                                                                                                        |
| c14orf149 | 0.463 | -2.158 chromosome 14 open reading frame 149 (C14orf149), mRNA.                                                                                                                    |
| c14orf159 | 0.463 | -2.158 chromosome 14 open reading frame 159 (C14orf159), mRNA.                                                                                                                    |
| c12orf44  | 0.463 | -2.158 chromosome 12 open reading frame 44 (C12orf44), mRNA.                                                                                                                      |
| csnk1g1   | 0.463 | -2.159 casein kinase 1, gamma 1 (CSNK1G1), transcript variant 2, mRNA.                                                                                                            |
| sdccag1   | 0.463 | -2.159 serologically defined colon cancer antigen 1 (SDCCAG1), mRNA.                                                                                                              |
| c8orf40   | 0.463 | -2.159 chromosome 8 open reading frame 40 (C8orf40), mRNA.                                                                                                                        |
| loc647037 | 0.463 | -2.16 PREDICTED: similar to Peptidyl-prolyl cis-trans isomerase NIMA-interacting 4 (Rotamase Pin4) (PPIase Pin4) (Parvulin 14) (Par14) (Peptidyl-prolyl cis/trans isomerase EPVH) |



(hPar14) (LOC647037), mRNA.

|             |       |        |                                                                                                                                             |
|-------------|-------|--------|---------------------------------------------------------------------------------------------------------------------------------------------|
| gluld1      | 0.463 | -2.16  | glutamate-ammonia ligase (glutamine synthetase) domain containing 1 (GLULD1), mRNA.                                                         |
| itgb2       | 0.463 | -2.16  | integrin, beta 2 (antigen CD18 (p95), lymphocyte function-associated antigen 1; macrophage antigen 1 (mac-1) beta subunit) (ITGB2), mRNA.   |
| ang         | 0.463 | -2.161 | angiogenin, ribonuclease, RNase A family, 5 (ANG), mRNA.                                                                                    |
| loc645385   | 0.463 | -2.161 | PREDICTED: similar to heterogeneous nuclear ribonucleoprotein A1 (LOC645385), mRNA.                                                         |
| hs.175465   | 0.463 | -2.161 | cDNA FLJ36847 fis, clone ASTRO2013671                                                                                                       |
| txn15       | 0.463 | -2.161 | thioredoxin-like 5 (TXNL5), mRNA.                                                                                                           |
| mov10       | 0.463 | -2.161 | Mov10, Moloney leukemia virus 10, homolog (mouse) (MOV10), mRNA.                                                                            |
| rabl4       | 0.463 | -2.161 | RAB, member of RAS oncogene family-like 4 (RABL4), mRNA.                                                                                    |
| c17orf49    | 0.463 | -2.161 | chromosome 17 open reading frame 49 (C17orf49), mRNA.                                                                                       |
| pex16       | 0.463 | -2.161 | peroxisomal biogenesis factor 16 (PEX16), transcript variant 1, mRNA.                                                                       |
| loc400464   | 0.463 | -2.161 | similar to FLJ43276 protein (LOC400464), mRNA.                                                                                              |
| pmpca       | 0.463 | -2.161 | peptidase (mitochondrial processing) alpha (PMPCA), nuclear gene encoding mitochondrial protein, mRNA.                                      |
| ywhaq       | 0.463 | -2.161 | tyrosine 3-monooxygenase/tryptophan 5-monooxygenase activation protein, theta polypeptide (YWHAQ), mRNA.                                    |
| rfc5        | 0.463 | -2.161 | replication factor C (activator 1) 5, 36.5kDa (RFC5), transcript variant 2, mRNA.                                                           |
| loc642934   | 0.463 | -2.161 | PREDICTED: hypothetical protein LOC642934 (LOC642934), mRNA.                                                                                |
| zfp11       | 0.463 | -2.162 | zinc finger protein-like 1 (ZFPL1), mRNA.                                                                                                   |
| asnsd1      | 0.463 | -2.162 | asparagine synthetase domain containing 1 (ASNSD1), mRNA.                                                                                   |
| pcm1        | 0.462 | -2.162 | pericentriolar material 1 (PCM1), mRNA.                                                                                                     |
| prmt7       | 0.462 | -2.162 | protein arginine methyltransferase 7 (PRMT7), mRNA.                                                                                         |
| gfm1        | 0.462 | -2.162 | G elongation factor, mitochondrial 1 (GFM1), nuclear gene encoding mitochondrial protein, mRNA.                                             |
| cdc5l       | 0.462 | -2.162 | CDC5 cell division cycle 5-like ( <i>S. pombe</i> ) (CDC5L), mRNA.                                                                          |
| anapc5      | 0.462 | -2.163 | anaphase promoting complex subunit 5 (ANAPC5), mRNA.                                                                                        |
| acaa1       | 0.462 | -2.163 | acetyl-Coenzyme A acyltransferase 1 (peroxisomal 3-oxoacyl-Coenzyme A thiolase) (ACAA1), nuclear gene encoding mitochondrial protein, mRNA. |
| prpf4       | 0.462 | -2.163 | PRP4 pre-mRNA processing factor 4 homolog (yeast) (PRPF4), mRNA.                                                                            |
| mtx1        | 0.462 | -2.163 | metaxin 1 (MTX1), transcript variant 1, mRNA.                                                                                               |
| ifnar1      | 0.462 | -2.163 | interferon (alpha, beta and omega) receptor 1 (IFNAR1), mRNA.                                                                               |
| prpsap2     | 0.462 | -2.163 | phosphoribosyl pyrophosphate synthetase-associated protein 2 (PRPSAP2), mRNA.                                                               |
| tnrc6b      | 0.462 | -2.164 | trinucleotide repeat containing 6B (TNRC6B), transcript variant 1, mRNA.                                                                    |
| srf         | 0.462 | -2.164 | serum response factor (c-fos serum response element-binding transcription factor) (SRF), mRNA.                                              |
| cabin1      | 0.462 | -2.164 | calcineurin binding protein 1 (CABIN1), mRNA.                                                                                               |
| phldb1      | 0.462 | -2.164 | pleckstrin homology-like domain, family B, member 1 (PHLDB1), mRNA.                                                                         |
| reep5       | 0.462 | -2.164 | receptor accessory protein 5 (REEP5), mRNA.                                                                                                 |
| c10orf22    | 0.462 | -2.165 | chromosome 10 open reading frame 22 (C10orf22), mRNA.                                                                                       |
| kiaa1287    | 0.462 | -2.165 | integrator complex subunit 2 (INTS2), mRNA.                                                                                                 |
| nktr        | 0.462 | -2.165 | natural killer-tumor recognition sequence (NKTR), mRNA.                                                                                     |
| gcs1        | 0.462 | -2.165 | glucosidase I (GCS1), mRNA.                                                                                                                 |
| comt        | 0.462 | -2.165 | catechol-O-methyltransferase (COMT), transcript variant MB-COMT, mRNA.                                                                      |
| dkfzp686o24 | 0.462 | -2.165 | hypothetical protein DKFZp686O24166 (DKFZp686O24166), mRNA.                                                                                 |
| znf598      | 0.462 | -2.165 | zinc finger protein 598 (ZNF598), mRNA.                                                                                                     |

|           |       |        |                                                                                                                          |
|-----------|-------|--------|--------------------------------------------------------------------------------------------------------------------------|
| loc400879 | 0.462 | -2.166 | PREDICTED: hypothetical LOC400879, transcript variant 1 (LOC400879), mRNA.                                               |
| raver2    | 0.462 | -2.166 | ribonucleoprotein, PTB-binding 2 (RAVER2), mRNA.                                                                         |
| bat1      | 0.462 | -2.166 | HLA-B associated transcript 1 (BAT1), transcript variant 2, mRNA.                                                        |
| loc144363 | 0.462 | -2.166 | hypothetical protein LOC144363 (LOC144363), mRNA.                                                                        |
| b3gntl1   | 0.462 | -2.166 | UDP-GlcNAc:betaGal beta-1,3-N-acetylglucosaminyltransferase-like 1 (B3GNTL1), mRNA.                                      |
| fbxo21    | 0.462 | -2.166 | F-box protein 21 (FBXO21), transcript variant 2, mRNA.                                                                   |
| rere      | 0.462 | -2.166 | arginine-glutamic acid dipeptide (RE) repeats (RERE), transcript variant 1, mRNA.                                        |
| b3gtl     | 0.462 | -2.167 | beta 3-glycosyltransferase-like (B3GTL), mRNA.                                                                           |
| ndfip1    | 0.461 | -2.167 | Nedd4 family interacting protein 1 (NDFIP1), mRNA.                                                                       |
| pthlh     | 0.461 | -2.167 | parathyroid hormone-like hormone (PTH LH), transcript variant 1, mRNA.                                                   |
| pmm2      | 0.461 | -2.167 | phosphomannomutase 2 (PMM2), mRNA.                                                                                       |
| rgs11     | 0.461 | -2.167 | regulator of G-protein signalling 11 (RGS11), transcript variant 1, mRNA.                                                |
| cep70     | 0.461 | -2.167 | centrosomal protein 70kDa (CEP70), mRNA.                                                                                 |
| nmt1      | 0.461 | -2.168 | N-myristoyltransferase 1 (NMT1), mRNA.                                                                                   |
| dad1      | 0.461 | -2.168 | defender against cell death 1 (DAD1), mRNA.                                                                              |
| znf689    | 0.461 | -2.168 | zinc finger protein 689 (ZNF689), mRNA.                                                                                  |
| rapsn     | 0.461 | -2.168 | receptor-associated protein of the synapse (RAPSN), transcript variant 1, mRNA.                                          |
| hs.4892   | 0.461 | -2.168 | clone 24841 mRNA sequence                                                                                                |
| triap1    | 0.461 | -2.168 | TP53 regulated inhibitor of apoptosis 1 (TRIAP1), mRNA.                                                                  |
| maf1      | 0.461 | -2.169 | MAF1 homolog (S. cerevisiae) (MAF1), mRNA.                                                                               |
| samd4b    | 0.461 | -2.169 | sterile alpha motif domain containing 4B (SAMD4B), mRNA.                                                                 |
| mef2d     | 0.461 | -2.169 | myocyte enhancer factor 2D (MEF2D), mRNA.                                                                                |
| idh3b     | 0.461 | -2.17  | isocitrate dehydrogenase 3 (NAD+) beta (IDH3B), nuclear gene encoding mitochondrial protein, transcript variant 1, mRNA. |
| loc642829 | 0.461 | -2.17  | PREDICTED: prostate-specific P704P (P704P), mRNA.                                                                        |
| itga11    | 0.461 | -2.17  | integrin, alpha 11 (ITGA11), transcript variant 2, mRNA.                                                                 |
| loc653890 | 0.461 | -2.17  | PREDICTED: similar to serine/threonine/tyrosine interacting protein (LOC653890), mRNA.                                   |
| foxd4     | 0.461 | -2.17  | forkhead box D4 (FOXD4), mRNA.                                                                                           |
| supt16h   | 0.461 | -2.17  | suppressor of Ty 16 homolog (S. cerevisiae) (SUPT16H), mRNA.                                                             |
| plxna3    | 0.461 | -2.17  | plexin A3 (PLXNA3), mRNA.                                                                                                |
| tgfb1i1   | 0.461 | -2.17  | transforming growth factor beta 1 induced transcript 1 (TGFB1I1), transcript variant 2, mRNA.                            |
| gk2       | 0.461 | -2.17  | glycerol kinase 2 (GK2), mRNA.                                                                                           |
| cldn12    | 0.461 | -2.171 | claudin 12 (CLDN12), mRNA.                                                                                               |
| ndufs5    | 0.461 | -2.171 | NADH dehydrogenase (ubiquinone) Fe-S protein 5, 15kDa (NADH-coenzyme Q reductase) (NDUFS5), mRNA.                        |
| cd99      | 0.461 | -2.171 | CD99 molecule (CD99), mRNA.                                                                                              |
| mrpl12    | 0.46  | -2.172 | mitochondrial ribosomal protein L12 (MRPL12), nuclear gene encoding mitochondrial protein, mRNA.                         |
| hs1bp3    | 0.46  | -2.172 | HCLS1 binding protein 3 (HS1BP3), mRNA.                                                                                  |
| c16orf7   | 0.46  | -2.172 | chromosome 16 open reading frame 7 (C16orf7), mRNA.                                                                      |
| rab5b     | 0.46  | -2.172 | RAB5B, member RAS oncogene family (RAB5B), mRNA.                                                                         |
| flj39378  | 0.46  | -2.172 | hypothetical protein FLJ39378 (FLJ39378), mRNA.                                                                          |
| hs.355933 | 0.46  | -2.172 | cDNA FLJ41921 fis, clone PERIC2002766                                                                                    |
| kiaa1698  | 0.46  | -2.173 | integrator complex subunit 5 (INTS5), mRNA.                                                                              |

|           |       |        |                                                                                                                                                                                |
|-----------|-------|--------|--------------------------------------------------------------------------------------------------------------------------------------------------------------------------------|
| sfrs8     | 0.46  | -2.173 | splicing factor, arginine/serine-rich 8 (suppressor-of-white-apricot homolog, Drosophila) (SFRS8), mRNA.                                                                       |
| nme6      | 0.46  | -2.174 | non-metastatic cells 6, protein expressed in (nucleoside-diphosphate kinase) (NME6), mRNA.                                                                                     |
| dcamkl2   | 0.46  | -2.174 | doublecortin and CaM kinase-like 2 (DCAMKL2), mRNA.                                                                                                                            |
| ell2      | 0.46  | -2.175 | elongation factor, RNA polymerase II, 2 (ELL2), mRNA.                                                                                                                          |
| slc39a11  | 0.46  | -2.175 | solute carrier family 39 (metal ion transporter), member 11 (SLC39A11), mRNA.                                                                                                  |
| sec22l1   | 0.46  | -2.175 | SEC22 vesicle trafficking protein-like 1 ( <i>S. cerevisiae</i> ) (SEC22L1), mRNA.                                                                                             |
| ormdl3    | 0.46  | -2.175 | ORM1-like 3 ( <i>S. cerevisiae</i> ) (ORMDL3), mRNA.                                                                                                                           |
| aes       | 0.46  | -2.175 | amino-terminal enhancer of split (AES), transcript variant 1, mRNA.                                                                                                            |
| suclg1    | 0.459 | -2.177 | succinate-CoA ligase, GDP-forming, alpha subunit (SUCLG1), mRNA.                                                                                                               |
| brd9      | 0.459 | -2.177 | bromodomain containing 9 (BRD9), transcript variant 1, mRNA.                                                                                                                   |
| magee1    | 0.459 | -2.177 | melanoma antigen family E, 1 (MAGEE1), mRNA.                                                                                                                                   |
| loc650472 | 0.459 | -2.177 | PREDICTED: similar to 60S ribosomal protein L23a (LOC650472), mRNA.                                                                                                            |
| znf524    | 0.459 | -2.177 | zinc finger protein 524 (ZNF524), mRNA.                                                                                                                                        |
| ctdp1     | 0.459 | -2.177 | CTD (carboxy-terminal domain, RNA polymerase II, polypeptide A) phosphatase, subunit 1 (CTDP1), transcript variant FCP1a, mRNA.                                                |
| rnpep     | 0.459 | -2.178 | arginyl aminopeptidase (aminopeptidase B) (RNPEP), mRNA.                                                                                                                       |
| hs.547712 | 0.459 | -2.178 | mRNA full length insert cDNA clone EUROIMAGE 1090207                                                                                                                           |
| cpt2      | 0.459 | -2.178 | carnitine palmitoyltransferase II (CPT2), nuclear gene encoding mitochondrial protein, mRNA.                                                                                   |
| mif       | 0.459 | -2.178 | macrophage migration inhibitory factor (glycosylation-inhibiting factor) (MIF), mRNA.                                                                                          |
| snap29    | 0.459 | -2.178 | synaptosomal-associated protein, 29kDa (SNAP29), mRNA.                                                                                                                         |
| malt1     | 0.459 | -2.178 | mucosa associated lymphoid tissue lymphoma translocation gene 1 (MALT1), transcript variant 1, mRNA.                                                                           |
| eif3s1    | 0.459 | -2.178 | eukaryotic translation initiation factor 3, subunit 1 alpha, 35kDa (EIF3S1), mRNA.                                                                                             |
| snx6      | 0.459 | -2.178 | sorting nexin 6 (SNX6), transcript variant 1, mRNA.                                                                                                                            |
| ppp1r12c  | 0.459 | -2.179 | protein phosphatase 1, regulatory (inhibitor) subunit 12C (PPP1R12C), mRNA.                                                                                                    |
| josd1     | 0.459 | -2.179 | Josephin domain containing 1 (JOSD1), mRNA.                                                                                                                                    |
| pinx1     | 0.459 | -2.179 | PIN2-interacting protein 1 (PINX1), mRNA.                                                                                                                                      |
| atp5g1    | 0.459 | -2.179 | ATP synthase, H <sup>+</sup> transporting, mitochondrial F0 complex, subunit C1 (subunit 9) (ATP5G1), nuclear gene encoding mitochondrial protein, transcript variant 2, mRNA. |
| shb       | 0.459 | -2.179 | Src homology 2 domain containing adaptor protein B (SHB), mRNA.                                                                                                                |
| eya4      | 0.459 | -2.179 | eyes absent homolog 4 ( <i>Drosophila</i> ) (EYA4), transcript variant 4, mRNA.                                                                                                |
| edn1      | 0.459 | -2.179 | endothelin 1 (EDN1), mRNA.                                                                                                                                                     |
| hivep1    | 0.459 | -2.179 | human immunodeficiency virus type I enhancer binding protein 1 (HIVEP1), mRNA.                                                                                                 |
| vrk2      | 0.459 | -2.18  | vaccinia related kinase 2 (VRK2), mRNA.                                                                                                                                        |
| churc1    | 0.459 | -2.18  | churchill domain containing 1 (CHURC1), mRNA.                                                                                                                                  |
| fam57a    | 0.459 | -2.18  | family with sequence similarity 57, member A (FAM57A), mRNA.                                                                                                                   |
| tmem99    | 0.459 | -2.18  | transmembrane protein 99 (TMEM99), mRNA.                                                                                                                                       |
| zfp106    | 0.459 | -2.18  | zinc finger protein 106 homolog (mouse) (ZFP106), mRNA.                                                                                                                        |
| erf       | 0.459 | -2.18  | Ets2 repressor factor (ERF), mRNA.                                                                                                                                             |
| rhobtb3   | 0.459 | -2.181 | Rho-related BTB domain containing 3 (RHOBTB3), mRNA.                                                                                                                           |
| gars      | 0.459 | -2.181 | glycyl-tRNA synthetase (GARS), mRNA.                                                                                                                                           |
| hkdc1     | 0.458 | -2.181 | hexokinase domain containing 1 (HKDC1), mRNA.                                                                                                                                  |
| elovl5    | 0.458 | -2.181 | ELOVL family member 5, elongation of long chain fatty acids (FEN1/Elo2, SUR4/Elo3-like, yeast) (ELOVL5), mRNA.                                                                 |

|           |       |                                                                                                                           |
|-----------|-------|---------------------------------------------------------------------------------------------------------------------------|
| ik        | 0.458 | -2.181 IK cytokine, down-regulator of HLA II (IK), mRNA.                                                                  |
| flj46072  | 0.458 | -2.182 FLJ46072 protein (FLJ46072), mRNA.                                                                                 |
| pfdn1     | 0.458 | -2.183 prefoldin 1 (PFDN1), mRNA.                                                                                         |
| pacsin3   | 0.458 | -2.183 protein kinase C and casein kinase substrate in neurons 3 (PACSIN3), mRNA.                                         |
| loc654260 | 0.458 | -2.183 PREDICTED: similar to beta-tubulin cofactor D isoform 1 (LOC654260), mRNA.                                         |
| flj20628  | 0.458 | -2.183 hypothetical protein FLJ20628 (FLJ20628), mRNA.                                                                    |
| dpy19l4   | 0.458 | -2.183 dpy-19-like 4 (C. elegans) (DPY19L4), mRNA.                                                                        |
| musk      | 0.458 | -2.183 muscle, skeletal, receptor tyrosine kinase (MUSK), mRNA.                                                           |
| rab3il1   | 0.458 | -2.183 RAB3A interacting protein (rabin3)-like 1 (RAB3IL1), mRNA.                                                         |
| gli2      | 0.458 | -2.183 GLI-Kruppel family member GLI2 (GLI2), transcript variant 4, mRNA.                                                 |
| cspp1     | 0.458 | -2.183 centrosome and spindle pole associated protein 1 (CSPP1), mRNA.                                                    |
| hs.556018 | 0.458 | -2.183 mRNA; cDNA DKFZp779F0411 (from clone DKFZp779F0411)                                                                |
| orc5l     | 0.458 | -2.184 origin recognition complex, subunit 5-like (yeast) (ORC5L), transcript variant 2, mRNA.                            |
| lmtk3     | 0.458 | -2.184 PREDICTED: lemur tyrosine kinase 3 (LMTK3), mRNA.                                                                  |
| fam122b   | 0.458 | -2.184 family with sequence similarity 122B (FAM122B), mRNA.                                                              |
| lctl      | 0.458 | -2.184 lactase-like (LCTL), mRNA.                                                                                         |
| wdr55     | 0.458 | -2.184 WD repeat domain 55 (WDR55), mRNA.                                                                                 |
| rabggtb   | 0.458 | -2.184 Rab geranylgeranyltransferase, beta subunit (RABGGTB), mRNA.                                                       |
| ccdc50    | 0.458 | -2.184 coiled-coil domain containing 50 (CCDC50), transcript variant 2, mRNA.                                             |
| ttyh3     | 0.458 | -2.184 tweety homolog 3 (Drosophila) (TTYH3), mRNA.                                                                       |
| dusp12    | 0.458 | -2.184 dual specificity phosphatase 12 (DUSP12), mRNA.                                                                    |
| tmem14b   | 0.458 | -2.184 transmembrane protein 14B (TMEM14B), mRNA.                                                                         |
| srprb     | 0.458 | -2.184 signal recognition particle receptor, B subunit (SRPRB), mRNA.                                                     |
| rai14     | 0.458 | -2.184 retinoic acid induced 14 (RAI14), mRNA.                                                                            |
| kpna1     | 0.458 | -2.185 karyopherin alpha 1 (importin alpha 5) (KPNA1), mRNA.                                                              |
| htr2a     | 0.458 | -2.185 5-hydroxytryptamine (serotonin) receptor 2A (HTR2A), mRNA.                                                         |
| c14orf135 | 0.458 | -2.185 chromosome 14 open reading frame 135 (C14orf135), mRNA.                                                            |
| fam86a    | 0.458 | -2.185 family with sequence similarity 86, member A (FAM86A), transcript variant 2, mRNA.                                 |
| hs.579631 | 0.458 | -2.185 AGENCOURT_10229596 NIH_MGC_141 cDNA clone IMAGE:6563923 5, mRNA sequence                                           |
| cpt1c     | 0.458 | -2.185 carnitine palmitoyltransferase 1C (CPT1C), mRNA.                                                                   |
| zgpap     | 0.458 | -2.185 zinc finger, CCCH-type with G patch domain (ZGPAT), transcript variant 2, mRNA.                                    |
| ppic      | 0.458 | -2.185 peptidylprolyl isomerase C (cyclophilin C) (PPIC), mRNA.                                                           |
| pdia6     | 0.458 | -2.185 protein disulfide isomerase family A, member 6 (PDIA6), mRNA.                                                      |
| rdx       | 0.458 | -2.186 radixin (RDX), mRNA.                                                                                               |
| slc38a2   | 0.458 | -2.186 solute carrier family 38, member 2 (SLC38A2), mRNA.                                                                |
| shkbp1    | 0.457 | -2.186 SH3KBP1 binding protein 1 (SHKBP1), mRNA.                                                                          |
| flj14640  | 0.457 | -2.186 coiled-coil domain containing 123 (CCDC123), mRNA.                                                                 |
| pold3     | 0.457 | -2.186 polymerase (DNA-directed), delta 3, accessory subunit (POLD3), mRNA.                                               |
| smarca5   | 0.457 | -2.186 SWI/SNF related, matrix associated, actin dependent regulator of chromatin, subfamily a, member 5 (SMARCA5), mRNA. |
| ctsl      | 0.457 | -2.187 cathepsin L (CTSL), transcript variant 1, mRNA.                                                                    |
| loc283951 | 0.457 | -2.187 hypothetical protein LOC283951 (LOC283951), mRNA.                                                                  |

|           |       |                                                                                                                               |
|-----------|-------|-------------------------------------------------------------------------------------------------------------------------------|
| acad11    | 0.457 | -2.187 acyl-Coenzyme A dehydrogenase family, member 11 (ACAD11), mRNA.                                                        |
| serinc3   | 0.457 | -2.187 serine incorporator 3 (SERINC3), transcript variant 2, mRNA.                                                           |
| coq9      | 0.457 | -2.187 coenzyme Q9 homolog ( <i>S. cerevisiae</i> ) (COQ9), mRNA.                                                             |
| tomm34    | 0.457 | -2.187 translocase of outer mitochondrial membrane 34 (TOMM34), nuclear gene encoding mitochondrial protein, mRNA             |
| nipa1     | 0.457 | -2.188 non imprinted in Prader-Willi/Angelman syndrome 1 (NIPA1), mRNA.                                                       |
| ifi35     | 0.457 | -2.188 interferon-induced protein 35 (IFI35), mRNA.                                                                           |
| dnajc12   | 0.457 | -2.188 DnaJ (Hsp40) homolog, subfamily C, member 12 (DNAJC12), transcript variant 2, mRNA.                                    |
| c9orf142  | 0.457 | -2.188 chromosome 9 open reading frame 142 (C9orf142), mRNA.                                                                  |
| mrpl9     | 0.457 | -2.189 mitochondrial ribosomal protein L9 (MRPL9), nuclear gene encoding mitochondrial protein, mRNA.                         |
| txnrd2    | 0.457 | -2.189 thioredoxin reductase 2 (TXNRD2), nuclear gene encoding mitochondrial protein, transcript variant 1, mRNA.             |
| psmd9     | 0.457 | -2.189 proteasome (prosome, macropain) 26S subunit, non-ATPase, 9 (PSMD9), mRNA.                                              |
| c16orf9   | 0.457 | -2.19 integrin alpha FG-GAP repeat containing 3 (ITFG3), mRNA.                                                                |
| coasy     | 0.457 | -2.19 Coenzyme A synthase (COASY), mRNA.                                                                                      |
| c3orf64   | 0.457 | -2.19 chromosome 3 open reading frame 64 (C3orf64), mRNA.                                                                     |
| plekhc1   | 0.456 | -2.191 pleckstrin homology domain containing, family C (with FERM domain) member 1 (PLEKHC1), mRNA.                           |
| ocrl      | 0.456 | -2.191 oculocerebrorenal syndrome of Lowe (OCRL), transcript variant b, mRNA.                                                 |
| centd3    | 0.456 | -2.191 centaurin, delta 3 (CENTD3), mRNA.                                                                                     |
| tmem39b   | 0.456 | -2.191 transmembrane protein 39B (TMEM39B), mRNA.                                                                             |
| uba2      | 0.456 | -2.192 SUMO1 activating enzyme subunit 2 (SAE2), mRNA.                                                                        |
| dyrk4     | 0.456 | -2.192 dual-specificity tyrosine-(Y)-phosphorylation regulated kinase 4 (DYRK4), mRNA.                                        |
| otud5     | 0.456 | -2.192 OTU domain containing 5 (OTUD5), mRNA.                                                                                 |
| xab2      | 0.456 | -2.192 XPA binding protein 2 (XAB2), mRNA.                                                                                    |
| mrps6     | 0.456 | -2.192 mitochondrial ribosomal protein S6 (MRPS6), nuclear gene encoding mitochondrial protein, mRNA.                         |
| scg5      | 0.456 | -2.193 secretogranin V (7B2 protein) (SCG5), mRNA.                                                                            |
| cybrd1    | 0.456 | -2.193 cytochrome b reductase 1 (CYBRD1), mRNA.                                                                               |
| mrps33    | 0.456 | -2.193 mitochondrial ribosomal protein S33 (MRPS33), nuclear gene encoding mitochondrial protein, transcript variant 1, mRNA. |
| mrps18a   | 0.456 | -2.193 mitochondrial ribosomal protein S18A (MRPS18A), nuclear gene encoding mitochondrial protein, mRNA.                     |
| kiaa0913  | 0.456 | -2.193 KIAA0913 (KIAA0913), mRNA.                                                                                             |
| loc644743 | 0.456 | -2.193 PREDICTED: hypothetical protein LOC644743 (LOC644743), mRNA.                                                           |
| loc642019 | 0.456 | -2.193 PREDICTED: similar to nucleolar protein 5A (LOC642019), mRNA.                                                          |
| tmem103   | 0.456 | -2.193 transmembrane protein 103 (TMEM103), transcript variant 1, mRNA.                                                       |
| suz12     | 0.456 | -2.194 suppressor of zeste 12 homolog ( <i>Drosophila</i> ) (SUZ12), mRNA.                                                    |
| pgcp      | 0.456 | -2.194 plasma glutamate carboxypeptidase (PGCP), mRNA.                                                                        |
| homer3    | 0.456 | -2.194 homer homolog 3 ( <i>Drosophila</i> ) (HOMER3), mRNA.                                                                  |
| ninj1     | 0.456 | -2.194 ninjurin 1 (NINJ1), mRNA.                                                                                              |
| wdr45     | 0.456 | -2.195 WD repeat domain 45 (WDR45), transcript variant 2, mRNA.                                                               |
| mat2a     | 0.456 | -2.195 methionine adenosyltransferase II, alpha (MAT2A), mRNA.                                                                |
| cpvl      | 0.456 | -2.195 carboxypeptidase, vitellogenic-like (CPVL), transcript variant 1, mRNA.                                                |
| ufc1      | 0.456 | -2.195 ubiquitin-fold modifier conjugating enzyme 1 (UFC1), mRNA.                                                             |
| stx6      | 0.456 | -2.195 syntaxin 6 (STX6), mRNA.                                                                                               |
| zbp1      | 0.456 | -2.195 Z-DNA binding protein 1 (ZBP1), mRNA.                                                                                  |

|           |       |                                                                                                          |
|-----------|-------|----------------------------------------------------------------------------------------------------------|
| prcc      | 0.456 | -2.195 papillary renal cell carcinoma (translocation-associated) (PRCC), transcript variant 2, mRNA.     |
| zcs12     | 0.455 | -2.195 DPH3, KTI11 homolog ( <i>S. cerevisiae</i> ) (DPH3), transcript variant 1, mRNA.                  |
| ldoc1l    | 0.455 | -2.196 leucine zipper, down-regulated in cancer 1-like (LDOC1L), mRNA.                                   |
| zdhhc17   | 0.455 | -2.196 zinc finger, DHHC-type containing 17 (ZDHHC17), mRNA.                                             |
| cxx1      | 0.455 | -2.196 CAAX box 1 (CXX1), mRNA.                                                                          |
| ripk1     | 0.455 | -2.197 receptor (TNFRSF)-interacting serine-threonine kinase 1 (RIPK1), mRNA.                            |
| loc90639  | 0.455 | -2.197 hypothetical protein LOC90639 (LOC90639), mRNA.                                                   |
| cep55     | 0.455 | -2.197 centrosomal protein 55kDa (CEP55), mRNA.                                                          |
| tob1      | 0.455 | -2.198 transducer of ERBB2, 1 (TOB1), mRNA.                                                              |
| cbx1      | 0.455 | -2.198 chromobox homolog 1 (HP1 beta homolog <i>Drosophila</i> ) (CBX1), mRNA.                           |
| adrm1     | 0.455 | -2.198 adhesion regulating molecule 1 (ADRM1), transcript variant 1, mRNA.                               |
| sfrs16    | 0.455 | -2.198 splicing factor, arginine/serine-rich 16 (SFRS16), mRNA.                                          |
| tubb      | 0.455 | -2.198 tubulin, beta (TUBB), mRNA.                                                                       |
| abhd5     | 0.455 | -2.199 abhydrolase domain containing 5 (ABHD5), mRNA.                                                    |
| sertad2   | 0.455 | -2.199 SERTA domain containing 2 (SERTAD2), mRNA.                                                        |
| gnpat     | 0.455 | -2.199 glyceronephosphate O-acyltransferase (GNPAT), mRNA.                                               |
| loc347292 | 0.455 | -2.199 PREDICTED: similar to ribosomal protein L36 (LOC347292), mRNA.                                    |
| mrps16    | 0.455 | -2.199 mitochondrial ribosomal protein S16 (MRPS16), nuclear gene encoding mitochondrial protein, mRNA.  |
| mgc4562   | 0.455 | -2.199 DIS3 mitotic control homolog ( <i>S. cerevisiae</i> )-like (DIS3L), mRNA.                         |
| sipa1l2   | 0.455 | -2.199 signal-induced proliferation-associated 1 like 2 (SIPA1L2), mRNA.                                 |
| bysl      | 0.455 | -2.199 bystin-like (BYSL), mRNA.                                                                         |
| cdkn3     | 0.455 | -2.199 cyclin-dependent kinase inhibitor 3 (CDK2-associated dual specificity phosphatase) (CDKN3), mRNA. |
| josd2     | 0.455 | -2.2 Josephin domain containing 2 (JOSD2), mRNA.                                                         |
| tnpo2     | 0.455 | -2.2 transportin 2 (importin 3, karyopherin beta 2b) (TNPO2), mRNA.                                      |
| cbara1    | 0.455 | -2.2 calcium binding atopy-related autoantigen 1 (CBARA1), mRNA.                                         |
| bcl7b     | 0.455 | -2.2 B-cell CLL/lymphoma 7B (BCL7B), transcript variant 2, mRNA.                                         |
| loc128439 | 0.455 | -2.2 hypothetical gene LOC128439 (LOC128439), mRNA.                                                      |
| bscl2     | 0.454 | -2.2 Bernardinelli-Seip congenital lipodystrophy 2 (seipin) (BSCL2), mRNA.                               |
| flj20534  | 0.454 | -2.201 chromosome 4 open reading frame 27 (C4orf27), mRNA.                                               |
| c6orf141  | 0.454 | -2.201 chromosome 6 open reading frame 141 (C6orf141), mRNA.                                             |
| usp13     | 0.454 | -2.201 ubiquitin specific peptidase 13 (isopeptidase T-3) (USP13), mRNA.                                 |
| grb2      | 0.454 | -2.201 growth factor receptor-bound protein 2 (GRB2), transcript variant 1, mRNA.                        |
| flj10006  | 0.454 | -2.201 IWS1 homolog ( <i>S. cerevisiae</i> ) (IWS1), mRNA.                                               |
| serf1b    | 0.454 | -2.201 small EDRK-rich factor 1B (centromeric) (SERF1B), mRNA.                                           |
| insl4     | 0.454 | -2.201 insulin-like 4 (placenta) (INSL4), mRNA.                                                          |
| gtf2ip1   | 0.454 | -2.201 general transcription factor II, i, pseudogene 1 (GTF2IP1) on chromosome 7.                       |
| c8orf32   | 0.454 | -2.202 chromosome 8 open reading frame 32 (C8orf32), mRNA.                                               |
| ift172    | 0.454 | -2.202 intraflagellar transport 172 homolog ( <i>Chlamydomonas</i> ) (IFT172), mRNA.                     |
| rbm39     | 0.454 | -2.202 RNA binding motif protein 39 (RBM39), transcript variant 1, mRNA.                                 |
| rab21     | 0.454 | -2.202 RAB21, member RAS oncogene family (RAB21), mRNA.                                                  |
| cox7a2    | 0.454 | -2.202 cytochrome c oxidase subunit VIIa polypeptide 2 (liver) (COX7A2), mRNA.                           |
| fbxo5     | 0.454 | -2.203 F-box protein 5 (FBXO5), mRNA.                                                                    |

|           |       |                                                                                                                                                                                      |
|-----------|-------|--------------------------------------------------------------------------------------------------------------------------------------------------------------------------------------|
| eif5a2    | 0.454 | -2.203 eukaryotic translation initiation factor 5A2 (EIF5A2), mRNA.                                                                                                                  |
| impa1     | 0.454 | -2.203 inositol(myo)-1(or 4)-monophosphatase 1 (IMPA1), mRNA.                                                                                                                        |
| scamp5    | 0.454 | -2.203 secretory carrier membrane protein 5 (SCAMP5), mRNA.                                                                                                                          |
| tacc2     | 0.454 | -2.204 transforming, acidic coiled-coil containing protein 2 (TACC2), transcript variant 2, mRNA.                                                                                    |
| hs.279842 | 0.454 | -2.204 HSPC157 protein, mRNA (cDNA clone IMAGE:6672800), partial cds                                                                                                                 |
| sh3bp5l   | 0.454 | -2.204 SH3-binding domain protein 5-like (SH3BP5L), mRNA.                                                                                                                            |
| c9orf23   | 0.454 | -2.204 chromosome 9 open reading frame 23 (C9orf23), transcript variant 1, mRNA.                                                                                                     |
| nars      | 0.454 | -2.204 asparaginyl-tRNA synthetase (NARS), mRNA.                                                                                                                                     |
| magmas    | 0.454 | -2.204 mitochondria-associated protein involved in granulocyte-macrophage colony-stimulating factor signal transduction (Magmas), nuclear gene encoding mitochondrial protein, mRNA. |
| sult2b1   | 0.454 | -2.204 sulfotransferase family, cytosolic, 2B, member 1 (SULT2B1), transcript variant 1, mRNA.                                                                                       |
| gja1      | 0.453 | -2.205 gap junction protein, alpha 1, 43kDa (connexin 43) (GJA1), mRNA.                                                                                                              |
| galnt4    | 0.453 | -2.206 UDP-N-acetyl-alpha-D-galactosamine:polypeptide N-acetylgalactosaminyltransferase 4 (GalNAc-T4) (GALNT4), mRNA.                                                                |
| wdr70     | 0.453 | -2.206 WD repeat domain 70 (WDR70), mRNA.                                                                                                                                            |
| efha1     | 0.453 | -2.206 EF-hand domain family, member A1 (EFHA1), mRNA.                                                                                                                               |
| loc389137 | 0.453 | -2.206 PREDICTED: similar to SVH protein (LOC389137), mRNA.                                                                                                                          |
| loc654121 | 0.453 | -2.206 PREDICTED: similar to C49H3.3 (LOC654121), mRNA.                                                                                                                              |
| drg1      | 0.453 | -2.207 developmentally regulated GTP binding protein 1 (DRG1), mRNA.                                                                                                                 |
| cops3     | 0.453 | -2.207 COP9 constitutive photomorphogenic homolog subunit 3 (Arabidopsis) (COPS3), mRNA.                                                                                             |
| ddx24     | 0.453 | -2.208 DEAD (Asp-Glu-Ala-Asp) box polypeptide 24 (DDX24), mRNA.                                                                                                                      |
| yif1a     | 0.453 | -2.208 Yip1 interacting factor homolog A (S. cerevisiae) (YIF1A), mRNA.                                                                                                              |
| tyms      | 0.453 | -2.208 thymidylate synthetase (TYMS), mRNA.                                                                                                                                          |
| hdhd2     | 0.453 | -2.208 haloacid dehalogenase-like hydrolase domain containing 2 (HDHD2), mRNA.                                                                                                       |
| ndufa10   | 0.453 | -2.208 NADH dehydrogenase (ubiquinone) 1 alpha subcomplex, 10, 42kDa (NDUFA10), nuclear gene encoding mitochondrial protein, mRNA.                                                   |
| calm1     | 0.453 | -2.208 calmodulin 1 (phosphorylase kinase, delta) (CALM1), mRNA.                                                                                                                     |
| med28     | 0.453 | -2.208 mediator complex subunit 28 (MED28), mRNA.                                                                                                                                    |
| c10orf33  | 0.452 | -2.21 chromosome 10 open reading frame 33 (C10orf33), mRNA.                                                                                                                          |
| cat       | 0.452 | -2.21 catalase (CAT), mRNA.                                                                                                                                                          |
| anxa5     | 0.452 | -2.21 annexin A5 (ANXA5), mRNA.                                                                                                                                                      |
| aip       | 0.452 | -2.21 aryl hydrocarbon receptor interacting protein (AIP), mRNA.                                                                                                                     |
| psme3     | 0.452 | -2.211 proteasome (prosome, macropain) activator subunit 3 (PA28 gamma; Ki) (PSME3), transcript variant 1, mRNA.                                                                     |
| tns3      | 0.452 | -2.212 tensin 3 (TNS3), mRNA.                                                                                                                                                        |
| mgc10911  | 0.452 | -2.213 chromosome 7 open reading frame 48 (C7orf48), mRNA.                                                                                                                           |
| polrmt    | 0.452 | -2.213 polymerase (RNA) mitochondrial (DNA directed) (POLRMT), nuclear gene encoding mitochondrial protein, mRNA.                                                                    |
| slc6a15   | 0.452 | -2.213 solute carrier family 6, member 15 (SLC6A15), transcript variant 2, mRNA.                                                                                                     |
| kctd3     | 0.452 | -2.213 potassium channel tetramerisation domain containing 3 (KCTD3), mRNA.                                                                                                          |
| sec23ip   | 0.452 | -2.214 SEC23 interacting protein (SEC23IP), mRNA.                                                                                                                                    |
| cbr1      | 0.452 | -2.214 carbonyl reductase 1 (CBR1), mRNA.                                                                                                                                            |
| ankrd12   | 0.452 | -2.214 ankyrin repeat domain 12 (ANKRD12), mRNA.                                                                                                                                     |
| clec11a   | 0.452 | -2.214 C-type lectin domain family 11, member A (CLEC11A), mRNA.                                                                                                                     |

|           |       |                                                                                                                                                    |
|-----------|-------|----------------------------------------------------------------------------------------------------------------------------------------------------|
| cap2      | 0.452 | -2.214 CAP, adenylate cyclase-associated protein, 2 (yeast) (CAP2), mRNA.                                                                          |
| ttl       | 0.452 | -2.215 tubulin tyrosine ligase (TTL), mRNA.                                                                                                        |
| thada     | 0.452 | -2.215 thyroid adenoma associated (THADA), transcript variant 1, mRNA.                                                                             |
| loc284988 | 0.452 | -2.215 PREDICTED: hypothetical LOC284988 (LOC284988), mRNA.                                                                                        |
| armc1     | 0.452 | -2.215 armadillo repeat containing 1 (ARMC1), mRNA.                                                                                                |
| b4galt5   | 0.451 | -2.215 UDP-Gal:betaGlcNAc beta 1,4- galactosyltransferase, polypeptide 5 (B4GALT5), mRNA.                                                          |
| hs.522924 | 0.451 | -2.215 cDNA FLJ43160 fis, clone FCBBF2000199                                                                                                       |
| mrps34    | 0.451 | -2.215 mitochondrial ribosomal protein S34 (MRPS34), nuclear gene encoding mitochondrial protein, mRNA.                                            |
| flj38717  | 0.451 | -2.215 FLJ38717 protein (FLJ38717), mRNA.                                                                                                          |
| brpf3     | 0.451 | -2.215 bromodomain and PHD finger containing, 3 (BRPF3), mRNA.                                                                                     |
| c16orf45  | 0.451 | -2.216 chromosome 16 open reading frame 45 (C16orf45), mRNA.                                                                                       |
| loc653226 | 0.451 | -2.216 PREDICTED: similar to Signal recognition particle 9 kDa protein (SRP9) (LOC653226), mRNA.                                                   |
| rbm13     | 0.451 | -2.217 RNA binding motif protein 13 (RBM13), mRNA.                                                                                                 |
| narfl     | 0.451 | -2.217 nuclear prelamin A recognition factor-like (NARFL), mRNA.                                                                                   |
| lpxn      | 0.451 | -2.217 leupaxin (LPXN), mRNA.                                                                                                                      |
| cpe       | 0.451 | -2.217 carboxypeptidase E (CPE), mRNA.                                                                                                             |
| stxbp2    | 0.451 | -2.217 syntaxin binding protein 2 (STXBP2), mRNA.                                                                                                  |
| galnt14   | 0.451 | -2.217 UDP-N-acetyl-alpha-D-galactosamine:polypeptide N-acetylgalactosaminyltransferase 14 (GalNAc-T14) (GALNT14), mRNA.                           |
| taf1b     | 0.451 | -2.218 TATA box binding protein (TBP)-associated factor, RNA polymerase I, B, 63kDa (TAF1B), mRNA.                                                 |
| emp3      | 0.451 | -2.218 epithelial membrane protein 3 (EMP3), mRNA.                                                                                                 |
| aldh2     | 0.451 | -2.219 aldehyde dehydrogenase 2 family (mitochondrial) (ALDH2), nuclear gene encoding mitochondrial protein, mRNA.                                 |
| wbp5      | 0.451 | -2.219 WW domain binding protein 5 (WBP5), transcript variant 4, mRNA.                                                                             |
| srp9      | 0.451 | -2.219 signal recognition particle 9kDa (SRP9), mRNA.                                                                                              |
| klf11     | 0.451 | -2.219 PREDICTED: Kruppel-like factor 11 (KLF11), mRNA.                                                                                            |
| klf13     | 0.451 | -2.219 Kruppel-like factor 13 (KLF13), mRNA.                                                                                                       |
| clpp      | 0.451 | -2.22 ClpP caseinolytic peptidase, ATP-dependent, proteolytic subunit homolog (E. coli) (CLPP), nuclear gene encoding mitochondrial protein, mRNA. |
| vps36     | 0.45  | -2.22 vacuolar protein sorting 36 homolog (S. cerevisiae) (VPS36), mRNA.                                                                           |
| flj12886  | 0.45  | -2.221 hypothetical protein FLJ12886 (FLJ12886), mRNA.                                                                                             |
| pet112l   | 0.45  | -2.221 PET112-like (yeast) (PET112L), mRNA.                                                                                                        |
| bcat1     | 0.45  | -2.221 branched chain aminotransferase 1, cytosolic (BCAT1), mRNA.                                                                                 |
| gys1      | 0.45  | -2.221 glycogen synthase 1 (muscle) (GYS1), mRNA.                                                                                                  |
| c20orf111 | 0.45  | -2.221 chromosome 20 open reading frame 111 (C20orf111), mRNA.                                                                                     |
| c1orf86   | 0.45  | -2.221 chromosome 1 open reading frame 86 (C1orf86), mRNA.                                                                                         |
| pomzp3    | 0.45  | -2.221 POM (POM121 homolog, rat) and ZP3 fusion (POMZP3), transcript variant 1, mRNA.                                                              |
| fam100a   | 0.45  | -2.221 family with sequence similarity 100, member A (FAM100A), mRNA.                                                                              |
| akr7a3    | 0.45  | -2.222 aldo-keto reductase family 7, member A3 (aflatoxin aldehyde reductase) (AKR7A3), mRNA.                                                      |
| loc51255  | 0.45  | -2.222 ring finger protein 181 (RNF181), mRNA.                                                                                                     |
| cited4    | 0.45  | -2.222 Cbp/p300-interacting transactivator, with Glu/Asp-rich carboxy-terminal domain, 4 (CITED4), mRNA.                                           |
| c6orf26   | 0.45  | -2.222 chromosome 6 open reading frame 26 (C6orf26), mRNA.                                                                                         |
| tmem50b   | 0.45  | -2.222 transmembrane protein 50B (TMEM50B), mRNA.                                                                                                  |



|           |       |                                                                                                                                                                                  |
|-----------|-------|----------------------------------------------------------------------------------------------------------------------------------------------------------------------------------|
| kiaa0674  | 0.45  | -2.222 PREDICTED: KIAA0674 (KIAA0674), mRNA.                                                                                                                                     |
| rps27a    | 0.45  | -2.222 ribosomal protein S27a (RPS27A), mRNA.                                                                                                                                    |
| me1       | 0.45  | -2.222 malic enzyme 1, NADP(+)-dependent, cytosolic (ME1), mRNA.                                                                                                                 |
| slc39a6   | 0.45  | -2.222 solute carrier family 39 (zinc transporter), member 6 (SLC39A6), mRNA.                                                                                                    |
| rpl5      | 0.45  | -2.223 ribosomal protein L5 (RPL5), mRNA.                                                                                                                                        |
| brd2      | 0.45  | -2.223 bromodomain containing 2 (BRD2), mRNA.                                                                                                                                    |
| sulf2     | 0.45  | -2.223 sulfatase 2 (SULF2), transcript variant 1, mRNA.                                                                                                                          |
| mgat2     | 0.45  | -2.223 mannosyl (alpha-1,6-)-glycoprotein beta-1,2-N-acetylglucosaminyltransferase (MGAT2), transcript variant 1, mRNA.                                                          |
| loc650518 | 0.45  | -2.223 PREDICTED: similar to Proteasome subunit alpha type 6 (Proteasome iota chain) (Macropain iota chain) (Multicatalytic endopeptidase complex iota chain) (LOC650518), mRNA. |
| smg1      | 0.45  | -2.224 PI-3-kinase-related kinase SMG-1 (SMG1), mRNA.                                                                                                                            |
| mkks      | 0.45  | -2.224 McKusick-Kaufman syndrome (MKKS), transcript variant 1, mRNA.                                                                                                             |
| tm9sf2    | 0.45  | -2.224 transmembrane 9 superfamily member 2 (TM9SF2), mRNA.                                                                                                                      |
| hyls1     | 0.45  | -2.224 hydrolethalus syndrome 1 (HYLS1), mRNA.                                                                                                                                   |
| hmgn4     | 0.45  | -2.224 high mobility group nucleosomal binding domain 4 (HMGN4), mRNA.                                                                                                           |
| il13ra1   | 0.45  | -2.224 interleukin 13 receptor, alpha 1 (IL13RA1), mRNA.                                                                                                                         |
| idua      | 0.45  | -2.225 iduronidase, alpha-L- (IDUA), mRNA.                                                                                                                                       |
| cox7b     | 0.449 | -2.225 cytochrome c oxidase subunit VIIb (COX7B), nuclear gene encoding mitochondrial protein, mRNA.                                                                             |
| guk1      | 0.449 | -2.225 guanylate kinase 1 (GUK1), mRNA.                                                                                                                                          |
| kiaa0922  | 0.449 | -2.226 KIAA0922 (KIAA0922), mRNA.                                                                                                                                                |
| aph1a     | 0.449 | -2.226 anterior pharynx defective 1 homolog A (C. elegans) (APH1A), transcript variant 1, mRNA.                                                                                  |
| acd       | 0.449 | -2.226 adrenocortical dysplasia homolog (mouse) (ACD), mRNA.                                                                                                                     |
| c9orf86   | 0.449 | -2.226 chromosome 9 open reading frame 86 (C9orf86), mRNA.                                                                                                                       |
| mus81     | 0.449 | -2.227 MUS81 endonuclease homolog (S. cerevisiae) (MUS81), mRNA.                                                                                                                 |
| rpud1     | 0.449 | -2.227 RNA pseudouridylate synthase domain containing 1 (RPUSD1), mRNA.                                                                                                          |
| phf23     | 0.449 | -2.227 PHD finger protein 23 (PHF23), mRNA.                                                                                                                                      |
| atp6v1d   | 0.449 | -2.228 ATPase, H+ transporting, lysosomal 34kDa, V1 subunit D (ATP6V1D), mRNA.                                                                                                   |
| tufm      | 0.449 | -2.228 Tu translation elongation factor, mitochondrial (TUFM), mRNA.                                                                                                             |
| farslb    | 0.449 | -2.228 phenylalanine-tRNA synthetase-like, beta subunit (FARSLB), mRNA.                                                                                                          |
| hs.535392 | 0.449 | -2.228 BX090843 Soares_testis_NHT cDNA clone IMAGp998C074110 ; IMAGE:1620414, mRNA sequence                                                                                      |
| tmem16k   | 0.449 | -2.228 transmembrane protein 16K (TMEM16K), mRNA.                                                                                                                                |
| sdf2l1    | 0.449 | -2.228 stromal cell-derived factor 2-like 1 (SDF2L1), mRNA.                                                                                                                      |
| polr1c    | 0.449 | -2.229 polymerase (RNA) I polypeptide C, 30kDa (POLR1C), transcript variant 2, mRNA.                                                                                             |
| ifitm2    | 0.449 | -2.229 interferon induced transmembrane protein 2 (1-8D) (IFITM2), mRNA.                                                                                                         |
| gadd45a   | 0.449 | -2.229 growth arrest and DNA-damage-inducible, alpha (GADD45A), mRNA.                                                                                                            |
| hs.296031 | 0.449 | -2.229 cDNA clone IMAGE:5262734                                                                                                                                                  |
| ppp1r2    | 0.449 | -2.23 protein phosphatase 1, regulatory (inhibitor) subunit 2 (PPP1R2), mRNA.                                                                                                    |
| wdr6      | 0.449 | -2.23 WD repeat domain 6 (WDR6), mRNA.                                                                                                                                           |
| slc40a1   | 0.448 | -2.23 solute carrier family 40 (iron-regulated transporter), member 1 (SLC40A1), mRNA.                                                                                           |
| timm17b   | 0.448 | -2.23 translocase of inner mitochondrial membrane 17 homolog B (yeast) (TIMM17B), mRNA.                                                                                          |
| gla       | 0.448 | -2.23 galactosidase, alpha (GLA), mRNA.                                                                                                                                          |
| mettl5    | 0.448 | -2.231 methyltransferase like 5 (METTL5), mRNA.                                                                                                                                  |

|           |       |                                                                                                                    |
|-----------|-------|--------------------------------------------------------------------------------------------------------------------|
| prim1     | 0.448 | -2.231 primase, DNA, polypeptide 1 (49kDa) (PRIM1), mRNA.                                                          |
| leprot1   | 0.448 | -2.231 leptin receptor overlapping transcript-like 1 (LEPROTL1), mRNA.                                             |
| faim3     | 0.448 | -2.231 Fas apoptotic inhibitory molecule 3 (FAIM3), mRNA.                                                          |
| ndufs2    | 0.448 | -2.231 NADH dehydrogenase (ubiquinone) Fe-S protein 2, 49kDa (NADH-coenzyme Q reductase) (NDUFS2), mRNA.           |
| psmb10    | 0.448 | -2.232 proteasome (prosome, macropain) subunit, beta type, 10 (PSMB10), mRNA.                                      |
| sntb2     | 0.448 | -2.232 syntrophin, b2 (dystrophin-associated protein A1, 59kDa, basic component 2) (SNTB2), trans.variant 1, mRNA. |
| kiaa1893  | 0.448 | -2.232 G protein-regulated inducer of neurite outgrowth 1 (KIAA1893), mRNA.                                        |
| tomm40l   | 0.448 | -2.232 translocase of outer mitochondrial membrane 40 homolog-like (yeast) (TOMM40L), mRNA.                        |
| tbc1d4    | 0.448 | -2.232 TBC1 domain family, member 4 (TBC1D4), mRNA.                                                                |
| ppme1     | 0.448 | -2.233 protein phosphatase methylesterase 1 (PPME1), mRNA.                                                         |
| mrpl53    | 0.448 | -2.233 mitochondrial ribosomal protein L53 (MRPL53), nuclear gene encoding mitochondrial protein, mRNA.            |
| fam82c    | 0.448 | -2.233 family with sequence similarity 82, member C (FAM82C), mRNA.                                                |
| lsm12     | 0.448 | -2.233 LSM12 homolog ( <i>S. cerevisiae</i> ) (LSM12), mRNA.                                                       |
| trappc5   | 0.448 | -2.233 trafficking protein particle complex 5 (TRAPPC5), transcript variant 3, mRNA.                               |
| bat2d1    | 0.448 | -2.233 BAT2 domain containing 1 (BAT2D1), mRNA.                                                                    |
| c10orf86  | 0.448 | -2.233 non-SMC element 4 homolog A ( <i>S. cerevisiae</i> ) (NSMCE4A), mRNA.                                       |
| clstn1    | 0.448 | -2.233 calyntenin 1 (CLSTN1), transcript variant 1, mRNA.                                                          |
| scap2     | 0.448 | -2.234 src family associated phosphoprotein 2 (SCAP2), mRNA.                                                       |
| loc653158 | 0.448 | -2.234 PREDICTED: similar to hypothetical protein MGC40405, transcript variant 1 (LOC653158), mRNA.                |
| tmem41b   | 0.448 | -2.234 transmembrane protein 41B (TMEM41B), mRNA.                                                                  |
| mapre1    | 0.448 | -2.234 microtubule-associated protein, RP/EB family, member 1 (MAPRE1), mRNA.                                      |
| foxm1     | 0.448 | -2.235 forkhead box M1 (FOXM1), transcript variant 1, mRNA.                                                        |
| stat5a    | 0.448 | -2.235 signal transducer and activator of transcription 5A (STAT5A), mRNA.                                         |
| rag1ap1   | 0.447 | -2.235 recombination activating gene 1 activating protein 1 (RAG1AP1), mRNA.                                       |
| mgc16824  | 0.447 | -2.235 esophageal cancer associated protein (MGC16824), mRNA.                                                      |
| mgc13125  | 0.447 | -2.235 BUD13 homolog ( <i>S. cerevisiae</i> ) (BUD13), mRNA.                                                       |
| pacs1     | 0.447 | -2.235 phosphofurin acidic cluster sorting protein 1 (PACS1), mRNA.                                                |
| aig1      | 0.447 | -2.236 androgen-induced 1 (AIG1), mRNA.                                                                            |
| dhx32     | 0.447 | -2.236 DEAH (Asp-Glu-Ala-His) box polypeptide 32 (DHX32), mRNA.                                                    |
| havcr1    | 0.447 | -2.236 hepatitis A virus cellular receptor 1 (HAVCR1), mRNA.                                                       |
| qtrt1     | 0.447 | -2.236 queuine tRNA-ribosyltransferase 1 (tRNA-guanine transglycosylase) (QTRT1), mRNA.                            |
| flj13909  | 0.447 | -2.237 hypothetical protein FLJ13909 (FLJ13909), mRNA.                                                             |
| tjp1      | 0.447 | -2.237 tight junction protein 1 (zona occludens 1) (TJP1), transcript variant 1, mRNA.                             |
| lsm12     | 0.447 | -2.237 LSM domain containing 1 (LSMD1), mRNA.                                                                      |
| syde1     | 0.447 | -2.238 synapse defective 1, Rho GTPase, homolog 1 ( <i>C. elegans</i> ) (SYDE1), mRNA.                             |
| ppp1r7    | 0.447 | -2.238 protein phosphatase 1, regulatory (inhibitor) subunit 7 (PPP1R7), mRNA.                                     |
| sf3b2     | 0.447 | -2.238 splicing factor 3b, subunit 2, 145kDa (SF3B2), mRNA.                                                        |
| frat2     | 0.447 | -2.238 frequently rearranged in advanced T-cell lymphomas 2 (FRAT2), mRNA.                                         |
| ddx5      | 0.447 | -2.239 DEAD (Asp-Glu-Ala-Asp) box polypeptide 5 (DDX5), mRNA.                                                      |
| orc3l     | 0.447 | -2.239 origin recognition complex, subunit 3-like (yeast) (ORC3L), transcript variant 1, mRNA.                     |
| hs.4988   | 0.447 | -2.239 mRNA; cDNA DKFZp686B24166 (from clone DKFZp686B24166)                                                       |
| znf358    | 0.447 | -2.239 zinc finger protein 358 (ZNF358), mRNA.                                                                     |

|           |       |        |                                                                                                                                              |
|-----------|-------|--------|----------------------------------------------------------------------------------------------------------------------------------------------|
| ube2j1    | 0.447 | -2.239 | ubiquitin-conjugating enzyme E2, J1 (UBC6 homolog, yeast) (UBE2J1), mRNA.                                                                    |
| ahctf1    | 0.447 | -2.239 | PREDICTED: AT hook containing transcription factor 1 (AHCTF1), mRNA.                                                                         |
| scfd1     | 0.447 | -2.239 | sec1 family domain containing 1 (SCFD1), transcript variant 1, mRNA.                                                                         |
| tnfrsf1a  | 0.447 | -2.24  | tumor necrosis factor receptor superfamily, member 1A (TNFRSF1A), mRNA.                                                                      |
| gnl2      | 0.447 | -2.24  | guanine nucleotide binding protein-like 2 (nucleolar) (GNL2), mRNA.                                                                          |
| loc645058 | 0.446 | -2.24  | PREDICTED: similar to hepatitis B virus x-interacting protein (LOC645058), mRNA.                                                             |
| phf11     | 0.446 | -2.24  | PHD finger protein 11 (PHF11), transcript variant 1, mRNA.                                                                                   |
| smu1      | 0.446 | -2.241 | smu-1 suppressor of mec-8 and unc-52 homolog (C. elegans) (SMU1), mRNA.                                                                      |
| esd       | 0.446 | -2.241 | esterase D/formylglutathione hydrolase (ESD), mRNA.                                                                                          |
| ayp1p1    | 0.446 | -2.241 | PREDICTED: AYP1 pseudogene 1 (AYP1p1), misc RNA.                                                                                             |
| chsy1     | 0.446 | -2.241 | carbohydrate (chondroitin) synthase 1 (CHSY1), mRNA.                                                                                         |
| cd109     | 0.446 | -2.241 | CD109 antigen (Gov platelet alloantigens) (CD109), mRNA.                                                                                     |
| lmo1      | 0.446 | -2.241 | LIM domain only 1 (rhombotin 1) (LMO1), mRNA.                                                                                                |
| rce1      | 0.446 | -2.241 | RCE1 homolog, prenyl protein peptidase ( <i>S. cerevisiae</i> ) (RCE1), transcript variant 2, mRNA.                                          |
| loc389787 | 0.446 | -2.241 | PREDICTED: similar to Translationally-controlled tumor protein (TCTP) (p23) (Histamine-releasing factor) (HRF) (Fortilin) (LOC389787), mRNA. |
| hs.483906 | 0.446 | -2.242 | mRNA; cDNA DKFZp667L2214 (from clone DKFZp667L2214)                                                                                          |
| u2af1l3   | 0.446 | -2.242 | U2(RNU2) small nuclear RNA auxiliary factor 1-like 3 (U2AF1L3), mRNA.                                                                        |
| eml1      | 0.446 | -2.242 | echinoderm microtubule associated protein like 1 (EML1), transcript variant 2, mRNA.                                                         |
| rpl36     | 0.446 | -2.242 | ribosomal protein L36 (RPL36), transcript variant 2, mRNA.                                                                                   |
| sma4      | 0.446 | -2.243 | SMA4 (SMA4), mRNA.                                                                                                                           |
| hs.163752 | 0.446 | -2.244 | zr87e09.r1 NCI_CGAP_GCB1 cDNA clone IMAGE:682696 5, mRNA sequence                                                                            |
| hmgb2     | 0.445 | -2.245 | high-mobility group box 2 (HMGB2), mRNA.                                                                                                     |
| vbp1      | 0.445 | -2.245 | von Hippel-Lindau binding protein 1 (VBP1), mRNA.                                                                                            |
| fgfrl1    | 0.445 | -2.245 | fibroblast growth factor receptor-like 1 (FGFRL1), transcript variant 2, mRNA.                                                               |
| isgf3g    | 0.445 | -2.245 | interferon-stimulated transcription factor 3, gamma 48kDa (ISGF3G), mRNA.                                                                    |
| mlph      | 0.445 | -2.245 | melanophilin (MLPH), mRNA.                                                                                                                   |
| znf499    | 0.445 | -2.245 | zinc finger and BTB domain containing 45 (ZBTB45), mRNA.                                                                                     |
| loc440157 | 0.445 | -2.245 | hypothetical gene supported by AK096951; BC066547 (LOC440157), mRNA.                                                                         |
| gabarap   | 0.445 | -2.246 | GABA(A) receptor-associated protein (GABARAP), mRNA.                                                                                         |
| esrra     | 0.445 | -2.246 | estrogen-related receptor alpha (ESRRA), mRNA.                                                                                               |
| c11orf10  | 0.445 | -2.246 | chromosome 11 open reading frame 10 (C11orf10), mRNA.                                                                                        |
| toe1      | 0.445 | -2.246 | target of EGR1, member 1 (nuclear) (TOE1), mRNA.                                                                                             |
| rhbdl2    | 0.445 | -2.247 | rhomboid, veinlet-like 2 ( <i>Drosophila</i> ) (RHBDL2), mRNA.                                                                               |
| psme4     | 0.445 | -2.247 | proteasome (prosome, macropain) activator subunit 4 (PSME4), mRNA.                                                                           |
| cno       | 0.445 | -2.247 | cappuccino homolog (mouse) (CNO), mRNA.                                                                                                      |
| mt1a      | 0.445 | -2.247 | metallothionein 1A (MT1A), mRNA.                                                                                                             |
| kiaa0406  | 0.445 | -2.248 | KIAA0406 (KIAA0406), mRNA.                                                                                                                   |
| hnrpa2b1  | 0.445 | -2.248 | heterogeneous nuclear ribonucleoprotein A2/B1 (HNRPA2B1), transcript variant B1, mRNA.                                                       |
| pcbp2     | 0.445 | -2.248 | poly(rC) binding protein 2 (PCBP2), transcript variant 2, mRNA.                                                                              |
| spc24     | 0.445 | -2.248 | SPC24, NDC80 kinetochore complex component, homolog ( <i>S. cerevisiae</i> ) (SPC24), mRNA.                                                  |
| hsa9761   | 0.445 | -2.248 | DIM1 dimethyladenosine transferase 1-like ( <i>S. cerevisiae</i> ) (DIMT1L), mRNA.                                                           |

|           |       |        |                                                                                                                                      |
|-----------|-------|--------|--------------------------------------------------------------------------------------------------------------------------------------|
| c18orf55  | 0.445 | -2.249 | chromosome 18 open reading frame 55 (C18orf55), mRNA.                                                                                |
| pcmt1     | 0.445 | -2.249 | protein-L-isoaspartate (D-aspartate) O-methyltransferase domain containing 1 (PCMTD1), mRNA.                                         |
| sars      | 0.445 | -2.249 | seryl-tRNA synthetase (SARS), mRNA.                                                                                                  |
| flj20625  | 0.445 | -2.249 | chromosome 11 open reading frame 59 (C11orf59), mRNA.                                                                                |
| marcksl1  | 0.444 | -2.25  | MARCKS-like 1 (MARCKSL1), mRNA.                                                                                                      |
| c7orf21   | 0.444 | -2.25  | transmembrane and ubiquitin-like domain containing 1 (TMUB1), mRNA.                                                                  |
| il27ra    | 0.444 | -2.25  | interleukin 27 receptor, alpha (IL27RA), mRNA.                                                                                       |
| c1orf31   | 0.444 | -2.25  | chromosome 1 open reading frame 31 (C1orf31), mRNA.                                                                                  |
| vps26a    | 0.444 | -2.251 | vacuolar protein sorting 26 homolog A (S. pombe) (VPS26A), transcript variant 2, mRNA.                                               |
| scarb2    | 0.444 | -2.251 | scavenger receptor class B, member 2 (SCARB2), mRNA.                                                                                 |
| psma5     | 0.444 | -2.251 | proteasome (prosome, macropain) subunit, alpha type, 5 (PSMA5), mRNA.                                                                |
| hsp1      | 0.444 | -2.251 | heat shock 105kDa/110kDa protein 1 (HSPH1), mRNA.                                                                                    |
| tbc1d8    | 0.444 | -2.251 | TBC1 domain family, member 8 (with GRAM domain) (TBC1D8), mRNA.                                                                      |
| kiaa0090  | 0.444 | -2.251 | KIAA0090 (KIAA0090), mRNA.                                                                                                           |
| wdr59     | 0.444 | -2.253 | WD repeat domain 59 (WDR59), mRNA.                                                                                                   |
| scyl1     | 0.444 | -2.253 | SCY1-like 1 (S. cerevisiae) (SCYL1), mRNA.                                                                                           |
| ift52     | 0.444 | -2.253 | intraflagellar transport 52 homolog (Chlamydomonas) (IFT52), mRNA.                                                                   |
| snx12     | 0.444 | -2.253 | sorting nexin 12 (SNX12), mRNA.                                                                                                      |
| poldip3   | 0.444 | -2.253 | polymerase (DNA-directed), delta interacting protein 3 (POLDIP3), transcript variant 1, mRNA.                                        |
| cops4     | 0.444 | -2.253 | COP9 constitutive photomorphogenic homolog subunit 4 (Arabidopsis) (COPS4), mRNA.                                                    |
| znf174    | 0.444 | -2.254 | zinc finger protein 174 (ZNF174), transcript variant 2, mRNA.                                                                        |
| foxk1     | 0.444 | -2.254 | forkhead box K1 (FOXK1), mRNA.                                                                                                       |
| aspscr1   | 0.444 | -2.254 | alveolar soft part sarcoma chromosome region, candidate 1 (ASPSCR1), mRNA.                                                           |
| pip5k1c   | 0.444 | -2.254 | phosphatidylinositol-4-phosphate 5-kinase, type I, gamma (PIP5K1C), mRNA.                                                            |
| pir       | 0.444 | -2.254 | pirin (iron-binding nuclear protein) (PIR), transcript variant 2, mRNA.                                                              |
| slc35a2   | 0.444 | -2.254 | solute carrier family 35 (UDP-galactose transporter), member A2 (SLC35A2), transcript variant 1, mRNA.                               |
| hibch     | 0.444 | -2.254 | 3-hydroxyisobutyryl-Coenzyme A hydrolase (HIBCH), transcript variant 1, mRNA.                                                        |
| sephs1    | 0.444 | -2.255 | selenophosphate synthetase 1 (SEPHS1), mRNA.                                                                                         |
| hs.145049 | 0.444 | -2.255 | full-length cDNA clone CS0DF005YI08 of Fetal brain of (human)                                                                        |
| exoc2     | 0.443 | -2.255 | exocyst complex component 2 (EXOC2), mRNA.                                                                                           |
| gnptab    | 0.443 | -2.256 | N-acetylglucosamine-1-phosphate transferase, alpha and beta subunits (GNPTAB), mRNA.                                                 |
| tmem126b  | 0.443 | -2.256 | transmembrane protein 126B (TMEM126B), mRNA.                                                                                         |
| p4ha2     | 0.443 | -2.256 | procollagen-proline, 2-oxoglutarate 4-dioxygenase (proline 4-hydroxylase), alpha polypeptide II (P4HA2), transcript variant 3, mRNA. |
| ccnk      | 0.443 | -2.256 | cyclin K (CCNK), mRNA.                                                                                                               |
| c1orf171  | 0.443 | -2.256 | tRNA-yW synthesizing protein 3 homolog (S. cerevisiae) (TYW3), mRNA.                                                                 |
| larp5     | 0.443 | -2.256 | La ribonucleoprotein domain family, member 5 (LARP5), mRNA.                                                                          |
| slc27a5   | 0.443 | -2.257 | solute carrier family 27 (fatty acid transporter), member 5 (SLC27A5), mRNA.                                                         |
| parva     | 0.443 | -2.257 | parvin, alpha (PARVA), mRNA.                                                                                                         |
| hs.374278 | 0.443 | -2.257 | cDNA FLJ38388 fis, clone FEBRA2004485                                                                                                |
| lat1-3tm  | 0.443 | -2.257 | PREDICTED: SLC7A5 pseudogene, transcript variant 2 (LAT1-3TM), misc RNA.                                                             |
| cd2bp2    | 0.443 | -2.257 | CD2 (cytoplasmic tail) binding protein 2 (CD2BP2), mRNA.                                                                             |

|           |       |                                                                                                                |
|-----------|-------|----------------------------------------------------------------------------------------------------------------|
| psenen    | 0.443 | -2.258 presenilin enhancer 2 homolog ( <i>C. elegans</i> ) (PSENE2), mRNA.                                     |
| loc114984 | 0.443 | -2.258 FLYWCH family member 2 (FLYWCH2), mRNA.                                                                 |
| ptpre     | 0.443 | -2.258 protein tyrosine phosphatase, receptor type, E (PTPRE), transcript variant 2, mRNA.                     |
| loc642989 | 0.443 | -2.258 PREDICTED: similar to 40S ribosomal protein S25 (LOC642989), mRNA.                                      |
| baz2b     | 0.443 | -2.258 bromodomain adjacent to zinc finger domain, 2B (BAZ2B), mRNA.                                           |
| hook2     | 0.443 | -2.258 hook homolog 2 ( <i>Drosophila</i> ) (HOOK2), mRNA.                                                     |
| ifrd1     | 0.443 | -2.259 interferon-related developmental regulator 1 (IFRD1), transcript variant 2, mRNA.                       |
| prmt2     | 0.443 | -2.259 protein arginine methyltransferase 2 (PRMT2), transcript variant 1, mRNA.                               |
| mrpl32    | 0.443 | -2.259 mitochondrial ribosomal protein L32 (MRPL32), nuclear gene encoding mitochondrial protein, mRNA.        |
| ath1      | 0.443 | -2.259 ATH1, acid trehalase-like 1 (yeast) (ATHL1), mRNA.                                                      |
| cse1l     | 0.443 | -2.259 CSE1 chromosome segregation 1-like (yeast) (CSE1L), transcript variant 2, mRNA.                         |
| e2f3      | 0.443 | -2.259 E2F transcription factor 3 (E2F3), mRNA.                                                                |
| mylip     | 0.443 | -2.26 myosin regulatory light chain interacting protein (MYLIP), mRNA.                                         |
| arl6ip4   | 0.442 | -2.26 ADP-ribosylation-like factor 6 interacting protein 4 (ARL6IP4), transcript variant 3, mRNA.              |
| rnd3      | 0.442 | -2.26 Rho family GTPase 3 (RND3), mRNA.                                                                        |
| ddx19a    | 0.442 | -2.26 DEAD (Asp-Glu-Ala-As) box polypeptide 19A (DDX19A), mRNA.                                                |
| rnaset2   | 0.442 | -2.26 ribonuclease T2 (RNASET2), mRNA.                                                                         |
| lypla3    | 0.442 | -2.261 lysophospholipase 3 (lysosomal phospholipase A2) (LYPLA3), mRNA.                                        |
| fras1     | 0.442 | -2.261 Fraser syndrome 1 (FRAS1), transcript variant 2, mRNA.                                                  |
| trim11    | 0.442 | -2.261 tripartite motif-containing 11 (TRIM11), mRNA.                                                          |
| pin4      | 0.442 | -2.262 protein (peptidylprolyl cis/trans isomerase) NIMA-interacting, 4 (parvulin) (PIN4), mRNA.               |
| loc347376 | 0.442 | -2.262 PREDICTED: similar to H3 histone, family 3B (LOC347376), mRNA.                                          |
| c20orf44  | 0.442 | -2.262 chromosome 20 open reading frame 44 (C20orf44), transcript variant 3, mRNA.                             |
| rbm38     | 0.442 | -2.262 RNA binding motif protein 38 (RBM38), transcript variant 2, mRNA.                                       |
| nfyc      | 0.442 | -2.262 nuclear transcription factor Y, gamma (NFYC), mRNA.                                                     |
| dtl       | 0.442 | -2.262 denticleless homolog ( <i>Drosophila</i> ) (DTL), mRNA.                                                 |
| loc651831 | 0.442 | -2.263 PREDICTED: similar to CG31232-PA, isoform A (LOC651831), mRNA.                                          |
| map1lc3b  | 0.442 | -2.263 microtubule-associated protein 1 light chain 3 beta (MAP1LC3B), mRNA.                                   |
| obfc2b    | 0.442 | -2.264 oligonucleotide/oligosaccharide-binding fold containing 2B (OBFC2B), mRNA.                              |
| cbr3      | 0.442 | -2.264 carbonyl reductase 3 (CBR3), mRNA.                                                                      |
| rarres1   | 0.442 | -2.264 retinoic acid receptor responder (tazarotene induced) 1 (RARRES1), transcript variant 2, mRNA.          |
| kiaa1598  | 0.442 | -2.264 KIAA1598 (KIAA1598), mRNA.                                                                              |
| pnrc2     | 0.442 | -2.264 proline-rich nuclear receptor coactivator 2 (PNRC2), mRNA.                                              |
| syncrip   | 0.442 | -2.264 synaptotagmin binding, cytoplasmic RNA interacting protein (SYNCRIP), mRNA.                             |
| eif1      | 0.442 | -2.265 eukaryotic translation initiation factor 1 (EIF1), mRNA.                                                |
| mcm3ap    | 0.442 | -2.265 MCM3 minichromosome maintenance deficient 3 ( <i>S. cerevisiae</i> ) associated protein (MCM3AP), mRNA. |
| pargc1    | 0.442 | -2.265 peroxisome proliferator-activated receptor gamma, coactivator-related 1 (PPRC1), mRNA.                  |
| c12orf24  | 0.441 | -2.265 chromosome 12 open reading frame 24 (C12orf24), mRNA.                                                   |
| adpgk     | 0.441 | -2.265 ADP-dependent glucokinase (ADPGK), mRNA.                                                                |
| mgc2752   | 0.441 | -2.265 hypothetical protein MGC2752 (MGC2752), mRNA.                                                           |
| cic       | 0.441 | -2.266 capicua homolog ( <i>Drosophila</i> ) (CIC), mRNA.                                                      |
| znf622    | 0.441 | -2.266 zinc finger protein 622 (ZNF622), mRNA.                                                                 |

|           |       |                                                                                                                                                  |
|-----------|-------|--------------------------------------------------------------------------------------------------------------------------------------------------|
| nono      | 0.441 | -2.266 non-POU domain containing, octamer-binding (NONO), mRNA.                                                                                  |
| ephb2     | 0.441 | -2.266 EPH receptor B2 (EPHB2), transcript variant 1, mRNA.                                                                                      |
| tada1l    | 0.441 | -2.267 transcriptional adaptor 1 (HFI1 homolog, yeast)-like (TADA1L), mRNA.                                                                      |
| fadd      | 0.441 | -2.267 Fas (TNFRSF6)-associated via death domain (FADD), mRNA.                                                                                   |
| trrap     | 0.441 | -2.267 transformation/transcription domain-associated protein (TRRAP), mRNA.                                                                     |
| c14orf172 | 0.441 | -2.267 chromosome 14 open reading frame 172 (C14orf172), mRNA.                                                                                   |
| loc129138 | 0.441 | -2.267 ankyrin repeat domain 54 (ANKRD54), mRNA.                                                                                                 |
| hif1a     | 0.441 | -2.267 hypoxia-inducible factor 1, alpha subunit (basic helix-loop-helix transcription factor) (HIF1A), transcript variant 1, mRNA.              |
| arhgap19  | 0.441 | -2.268 Rho GTPase activating protein 19 (ARHGAP19), mRNA.                                                                                        |
| hs.505676 | 0.441 | -2.268 cDNA FLJ33772 fis, clone BRSSN2000175                                                                                                     |
| rcor3     | 0.441 | -2.268 REST corepressor 3 (RCOR3), mRNA.                                                                                                         |
| ddt       | 0.441 | -2.268 D-dopachrome tautomerase (DDT), mRNA.                                                                                                     |
| sreb1     | 0.441 | -2.268 sterol regulatory element binding transcription factor 1 (SREBF1), transcript variant 2, mRNA.                                            |
| ells1     | 0.441 | -2.268 hypothetical protein Ells1 (Ells1), mRNA.                                                                                                 |
| kctd10    | 0.441 | -2.269 potassium channel tetramerisation domain containing 10 (KCTD10), mRNA.                                                                    |
| c14orf80  | 0.441 | -2.269 chromosome 14 open reading frame 80 (C14orf80), mRNA.                                                                                     |
| crot      | 0.441 | -2.269 carnitine O-octanoyltransferase (CROT), mRNA.                                                                                             |
| ccdc53    | 0.441 | -2.269 coiled-coil domain containing 53 (CCDC53), mRNA.                                                                                          |
| srm       | 0.441 | -2.269 spermidine synthase (SRM), mRNA.                                                                                                          |
| isoc1     | 0.441 | -2.269 isochorismatase domain containing 1 (ISOC1), mRNA.                                                                                        |
| mgc27345  | 0.441 | -2.269 PREDICTED: hypothetical protein MGC27345 (MGC27345), misc RNA.                                                                            |
| c19orf7   | 0.441 | -2.269 chromosome 19 open reading frame 7 (C19orf7), mRNA.                                                                                       |
| h2afx     | 0.441 | -2.269 H2A histone family, member X (H2AFX), mRNA.                                                                                               |
| c12orf47  | 0.441 | -2.27 chromosome 12 open reading frame 47 (C12orf47), mRNA.                                                                                      |
| mpp5      | 0.441 | -2.27 membrane protein, palmitoylated 5 (MAGUK p55 subfamily member 5) (MPP5), mRNA.                                                             |
| cav1      | 0.44  | -2.27 caveolin 1, caveolae protein, 22kDa (CAV1), mRNA.                                                                                          |
| wibg      | 0.44  | -2.271 within bgcn homolog (Drosophila) (WIBG), mRNA.                                                                                            |
| slc35e3   | 0.44  | -2.271 solute carrier family 35, member E3 (SLC35E3), mRNA.                                                                                      |
| fh        | 0.44  | -2.271 fumarate hydratase (FH), nuclear gene encoding mitochondrial protein, mRNA.                                                               |
| eif4ebp2  | 0.44  | -2.271 eukaryotic translation initiation factor 4E binding protein 2 (EIF4EBP2), mRNA.                                                           |
| hebp2     | 0.44  | -2.272 heme binding protein 2 (HEBP2), mRNA.                                                                                                     |
| igf2bp3   | 0.44  | -2.272 insulin-like growth factor 2 mRNA binding protein 3 (IGF2BP3), mRNA.                                                                      |
| cstb      | 0.44  | -2.273 cystatin B (stefin B) (CSTB), mRNA.                                                                                                       |
| rpa1      | 0.44  | -2.273 replication protein A1, 70kDa (RPA1), mRNA.                                                                                               |
| irs1      | 0.44  | -2.274 insulin receptor substrate 1 (IRS1), mRNA.                                                                                                |
| atox1     | 0.44  | -2.274 ATX1 antioxidant protein 1 homolog (yeast) (ATOX1), mRNA.                                                                                 |
| sema4f    | 0.44  | -2.274 sema domain, immunoglobulin domain (Ig), transmembrane domain <sup>TM</sup> and short cytoplasmic domain, (semaphorin) 4F (SEMA4F), mRNA. |
| spin1     | 0.44  | -2.274 spinster homolog 1 (Drosophila) (SPNS1), mRNA.                                                                                            |
| tsc2      | 0.44  | -2.275 tuberous sclerosis 2 (TSC2), transcript variant 1, mRNA.                                                                                  |
| idh2      | 0.44  | -2.275 isocitrate dehydrogenase 2 (NADP+), mitochondrial (IDH2), mRNA.                                                                           |

|           |       |                                                                                                                   |
|-----------|-------|-------------------------------------------------------------------------------------------------------------------|
| tm2d2     | 0.44  | -2.275 TM2 domain containing 2 (TM2D2), transcript variant 1, mRNA.                                               |
| uxt       | 0.44  | -2.275 ubiquitously-expressed transcript (UXT), transcript variant 1, mRNA.                                       |
| arl1      | 0.44  | -2.275 ADP-ribosylation factor-like 1 (ARL1), mRNA.                                                               |
| c6orf61   | 0.44  | -2.275 PREDICTED: chromosome 6 open reading frame 61 (C6orf61), mRNA.                                             |
| fvt1      | 0.439 | -2.276 follicular lymphoma variant translocation 1 (FVT1), mRNA.                                                  |
| c1orf69   | 0.439 | -2.276 chromosome 1 open reading frame 69 (C1orf69), mRNA.                                                        |
| lmo4      | 0.439 | -2.276 LIM domain only 4 (LMO4), mRNA.                                                                            |
| derl1     | 0.439 | -2.276 Der1-like domain family, member 1 (DERL1), mRNA.                                                           |
| slc24a6   | 0.439 | -2.276 solute carrier family 24 (sodium/potassium/calcium exchanger), member 6 (SLC24A6), mRNA.                   |
| alkbh8    | 0.439 | -2.276 alkB, alkylation repair homolog 8 (E. coli) (ALKBH8), mRNA.                                                |
| mt1g      | 0.439 | -2.276 metallothionein 1G (MT1G), mRNA.                                                                           |
| ablim3    | 0.439 | -2.277 actin binding LIM protein family, member 3 (ABLIM3), mRNA.                                                 |
| prkcq     | 0.439 | -2.277 protein kinase C, theta (PRKCQ), mRNA.                                                                     |
| loc402251 | 0.439 | -2.277 PREDICTED: similar to eukaryotic translation elongation factor 1 alpha 2 (LOC402251), mRNA.                |
| med19     | 0.439 | -2.277 mediator complex subunit 19 (MED19), mRNA.                                                                 |
| bivm      | 0.439 | -2.277 basic, immunoglobulin-like variable motif containing (BIVM), mRNA.                                         |
| kiaa0753  | 0.439 | -2.278 KIAA0753 (KIAA0753), mRNA.                                                                                 |
| wsb2      | 0.439 | -2.278 WD repeat and SOCS box-containing 2 (WSB2), mRNA.                                                          |
| p4hb      | 0.439 | -2.278 procollagen-proline, 2-oxoglutarate 4-dioxygenase (proline 4-hydroxylase), beta polypeptide (P4HB), mRNA.  |
| gnai2     | 0.439 | -2.278 guanine nucleotide binding protein (G protein), alpha inhibiting activity polypeptide 2 (GNAI2), mRNA.     |
| gtf3c2    | 0.439 | -2.278 general transcription factor IIIC, polypeptide 2, beta 110kDa (GTF3C2), transcript variant 2, mRNA.        |
| foxred1   | 0.439 | -2.278 FAD-dependent oxidoreductase domain containing 1 (FOXRED1), mRNA.                                          |
| smug1     | 0.439 | -2.278 single-strand-selective monofunctional uracil-DNA glycosylase 1 (SMUG1), mRNA.                             |
| prkab2    | 0.439 | -2.279 protein kinase, AMP-activated, beta 2 non-catalytic subunit (PRKAB2), mRNA.                                |
| syvn1     | 0.439 | -2.279 synovial apoptosis inhibitor 1, synoviolin (SYVN1), transcript variant 2, mRNA.                            |
| flj10986  | 0.439 | -2.279 hypothetical protein FLJ10986 (FLJ10986), mRNA.                                                            |
| exosc10   | 0.439 | -2.279 exosome component 10 (EXOSC10), transcript variant 1, mRNA.                                                |
| dbi       | 0.439 | -2.279 diazepam binding inhibitor (GABA receptor modulator, acyl-Coenzyme A binding protein) (DBI), mRNA.         |
| kdelr1    | 0.439 | -2.28 KDEL (Lys-Asp-Glu-Leu) endoplasmic reticulum protein retention receptor 1 (KDELR1), mRNA.                   |
| htatip2   | 0.439 | -2.28 HIV-1 Tat interactive protein 2, 30kDa (HTATIP2), mRNA.                                                     |
| flj20558  | 0.439 | -2.28 chromosome 2 open reading frame 42 (C2orf42), mRNA.                                                         |
| slc10a3   | 0.439 | -2.28 solute carrier family 10 (sodium/bile acid cotransporter family), member 3 (SLC10A3), mRNA.                 |
| spred1    | 0.439 | -2.28 sprouty-related, EVH1 domain containing 1 (SPRED1), mRNA.                                                   |
| lhfp      | 0.439 | -2.28 lipoma HMGIC fusion partner (LHFP), mRNA.                                                                   |
| sdf2      | 0.439 | -2.28 stromal cell-derived factor 2 (SDF2), mRNA.                                                                 |
| tp53rk    | 0.439 | -2.28 TP53 regulating kinase (TP53RK), mRNA.                                                                      |
| enosf1    | 0.439 | -2.28 enolase superfamily member 1 (ENOSF1), mRNA.                                                                |
| sult1a4   | 0.439 | -2.281 sulfotransferase family, cytosolic, 1A, phenol-preferring, member 4 (SULT1A4), transcript variant 3, mRNA. |
| gpr172a   | 0.439 | -2.281 G protein-coupled receptor 172A (GPR172A), mRNA.                                                           |
| fen1      | 0.439 | -2.281 flap structure-specific endonuclease 1 (FEN1), mRNA.                                                       |
| rxra      | 0.438 | -2.281 retinoid X receptor, alpha (RXRA), mRNA.                                                                   |
| kiaa0494  | 0.438 | -2.281 KIAA0494 (KIAA0494), mRNA.                                                                                 |

|           |       |                                                                                                                               |
|-----------|-------|-------------------------------------------------------------------------------------------------------------------------------|
| mettl2a   | 0.438 | -2.281 methyltransferase like 2A (METTL2A), mRNA.                                                                             |
| ccdc71    | 0.438 | -2.281 coiled-coil domain containing 71 (CCDC71), mRNA.                                                                       |
| ttc32     | 0.438 | -2.281 tetratricopeptide repeat domain 32 (TTC32), mRNA.                                                                      |
| c16orf63  | 0.438 | -2.281 chromosome 16 open reading frame 63 (C16orf63), mRNA.                                                                  |
| zmpste24  | 0.438 | -2.282 zinc metallopeptidase (STE24 homolog, yeast) (ZMPSTE24), mRNA.                                                         |
| rbm15b    | 0.438 | -2.282 RNA binding motif protein 15B (RBM15B), mRNA.                                                                          |
| tmem185a  | 0.438 | -2.282 transmembrane protein 185A (TMEM185A), mRNA.                                                                           |
| tceal3    | 0.438 | -2.282 transcription elongation factor A (SII)-like 3 (TCEAL3), transcript variant 1, mRNA.                                   |
| slc30a7   | 0.438 | -2.283 solute carrier family 30 (zinc transporter), member 7 (SLC30A7), mRNA.                                                 |
| gtf2ird1  | 0.438 | -2.283 GTF2I repeat domain containing 1 (GTF2IRD1), transcript variant 1, mRNA.                                               |
| mapkapk5  | 0.438 | -2.283 mitogen-activated protein kinase-activated protein kinase 5 (MAPKAPK5), transcript variant 2, mRNA.                    |
| mrpl35    | 0.438 | -2.284 mitochondrial ribosomal protein L35 (MRPL35), nuclear gene encoding mitochondrial protein, transcript variant 1, mRNA. |
| loc168850 | 0.438 | -2.284 hypothetical protein LOC168850 (LOC168850), mRNA.                                                                      |
| nupr1     | 0.438 | -2.284 nuclear protein 1 (NUPR1), transcript variant 1, mRNA.                                                                 |
| loc400657 | 0.438 | -2.284 hypothetical gene supported by BC036588 (LOC400657), mRNA.                                                             |
| gng11     | 0.438 | -2.284 guanine nucleotide binding protein (G protein), gamma 11 (GNG11), mRNA.                                                |
| phacs     | 0.438 | -2.284 1-aminocyclopropane-1-carboxylate synthase (PHACS), mRNA.                                                              |
| c14orf143 | 0.438 | -2.285 chromosome 14 open reading frame 143 (C14orf143), mRNA.                                                                |
| nrbp2     | 0.438 | -2.285 nuclear receptor binding protein 2 (NRBP2), mRNA.                                                                      |
| cpsf3     | 0.438 | -2.285 cleavage and polyadenylation specific factor 3, 73kDa (CPSF3), mRNA.                                                   |
| tubb2c    | 0.438 | -2.285 tubulin, beta 2C (TUBB2C), mRNA.                                                                                       |
| efhc1     | 0.437 | -2.286 EF-hand domain (C-terminal) containing 1 (EFHC1), mRNA.                                                                |
| tmem15    | 0.437 | -2.286 transmembrane protein 15 (TMEM15), mRNA.                                                                               |
| pomp      | 0.437 | -2.287 proteasome maturation protein (POMP), mRNA.                                                                            |
| perld1    | 0.437 | -2.287 per1-like domain containing 1 (PERLD1), mRNA.                                                                          |
| nup205    | 0.437 | -2.287 nucleoporin 205kDa (NUP205), mRNA.                                                                                     |
| wbscr27   | 0.437 | -2.287 Williams Beuren syndrome chromosome region 27 (WBSCR27), mRNA.                                                         |
| dhx30     | 0.437 | -2.287 DEAH (Asp-Glu-Ala-His) box polypeptide 30 (DHX30), transcript variant 2, mRNA.                                         |
| loc650276 | 0.437 | -2.287 PREDICTED: similar to 60S ribosomal protein L7 (LOC650276), mRNA.                                                      |
| scamp4    | 0.437 | -2.288 secretory carrier membrane protein 4 (SCAMP4), mRNA.                                                                   |
| iars2     | 0.437 | -2.288 isoleucyl-tRNA synthetase 2, mitochondrial (IARS2), mRNA.                                                              |
| c10orf6   | 0.437 | -2.289 chromosome 10 open reading frame 6 (C10orf6), mRNA.                                                                    |
| oact5     | 0.437 | -2.289 membrane bound O-acyltransferase domain containing 5 (MBOAT5), mRNA.                                                   |
| tmem43    | 0.437 | -2.289 transmembrane protein 43 (TMEM43), mRNA.                                                                               |
| prkra     | 0.437 | -2.289 protein kinase, interferon-inducible double stranded RNA dependent activator (PRKRA), mRNA.                            |
| zcchc11   | 0.437 | -2.289 zinc finger, CCHC domain containing 11 (ZCCHC11), transcript variant 2, mRNA.                                          |
| maged1    | 0.437 | -2.289 melanoma antigen family D, 1 (MAGED1), transcript variant 1, mRNA.                                                     |
| nfe2l2    | 0.437 | -2.29 nuclear factor (erythroid-derived 2)-like 2 (NFE2L2), mRNA.                                                             |
| cnih      | 0.437 | -2.29 cornichon homolog (Drosophila) (CNIH), transcript variant 2, mRNA.                                                      |
| mgc71993  | 0.437 | -2.29 similar to DNA segment, Chr 11, Brigham & Womens Genetics 0434 expressed (MGC71993), mRNA.                              |
| loc440341 | 0.437 | -2.29 PREDICTED: similar to nuclear pore complex interacting protein, transcript variant 4 (LOC440341), mRNA.                 |
| eny2      | 0.437 | -2.29 enhancer of yellow 2 homolog (Drosophila) (ENY2), mRNA.                                                                 |



|           |       |        |                                                                                                                                                       |
|-----------|-------|--------|-------------------------------------------------------------------------------------------------------------------------------------------------------|
| loc284230 | 0.436 | -2.291 | PREDICTED: similar to large subunit ribosomal protein L36a (LOC284230), mRNA.                                                                         |
| pgls      | 0.436 | -2.291 | 6-phosphogluconolactonase (PGLS), mRNA.                                                                                                               |
| hyal3     | 0.436 | -2.291 | hyaluronoglucosaminidase 3 (HYAL3), mRNA.                                                                                                             |
| rnu70     | 0.436 | -2.291 | small nucleolar RNA, H/ACA box 70 (SNORA70) on chromosome X.                                                                                          |
| diaph2    | 0.436 | -2.292 | diaphanous homolog 2 (Drosophila) (DIAPH2), transcript variant 12C, mRNA.                                                                             |
| tspan14   | 0.436 | -2.292 | tetraspanin 14 (TSPAN14), mRNA.                                                                                                                       |
| utp11l    | 0.436 | -2.292 | UTP11-like, U3 small nucleolar ribonucleoprotein, (yeast) (UTP11L), mRNA.                                                                             |
| zfpm1     | 0.436 | -2.292 | zinc finger protein, multitype 1 (ZFPM1), mRNA.                                                                                                       |
| ifi6      | 0.436 | -2.293 | interferon, alpha-inducible protein 6 (IFI6), transcript variant 2, mRNA.                                                                             |
| mras      | 0.436 | -2.293 | muscle RAS oncogene homolog (MRAS), mRNA.                                                                                                             |
| epc1      | 0.436 | -2.293 | enhancer of polycomb homolog 1 (Drosophila) (EPC1), mRNA.                                                                                             |
| c1orf60   | 0.436 | -2.293 | integrator complex subunit 3 (INTS3), mRNA.                                                                                                           |
| hes4      | 0.436 | -2.294 | hairy and enhancer of split 4 (Drosophila) (HES4), mRNA.                                                                                              |
| smarcd2   | 0.436 | -2.294 | SWI/SNF related, matrix associated, actin dependent regulator of chromatin, subfamily d, member 2 (SMARCD2), mRNA.                                    |
| taok1     | 0.436 | -2.294 | TAO kinase 1 (TAOK1), mRNA.                                                                                                                           |
| plaur     | 0.436 | -2.294 | plasminogen activator, urokinase receptor (PLAUR), transcript variant 2, mRNA.                                                                        |
| loc645367 | 0.436 | -2.295 | PREDICTED: similar to Gamma-glutamyltranspeptidase 1 precursor (Gamma-glutamyltransferase 1) (CD224 antigen), transcript variant 2 (LOC645367), mRNA. |
| mtif2     | 0.436 | -2.295 | mitochondrial translational initiation factor 2 (MTIF2), nuclear gene encoding mitochondrial protein, transcript variant 1, mRNA.                     |
| nicn1     | 0.436 | -2.295 | nicolin 1 (NICN1), mRNA.                                                                                                                              |
| glg1      | 0.436 | -2.295 | golgi apparatus protein 1 (GLG1), mRNA.                                                                                                               |
| atp6v0d1  | 0.436 | -2.295 | ATPase, H+ transporting, lysosomal 38kDa, V0 subunit d isoform 1 (ATP6VOD1), mRNA.                                                                    |
| c22orf5   | 0.436 | -2.295 | transmembrane protein 184B (TMEM184B), mRNA.                                                                                                          |
| rpl35     | 0.435 | -2.296 | ribosomal protein L35 (RPL35), mRNA.                                                                                                                  |
| opr1      | 0.435 | -2.297 | opiate receptor-like 1 (OPRL1), transcript variant 1, mRNA.                                                                                           |
| c14orf120 | 0.435 | -2.297 | PREDICTED: chromosome 14 open reading frame 120, transcript variant 11 (C14orf120), mRNA.                                                             |
| hectd1    | 0.435 | -2.297 | HECT domain containing 1 (HECTD1), mRNA.                                                                                                              |
| rabgap1   | 0.435 | -2.297 | RAB GTPase activating protein 1 (RABGAP1), mRNA.                                                                                                      |
| c1orf128  | 0.435 | -2.297 | chromosome 1 open reading frame 128 (C1orf128), mRNA.                                                                                                 |
| vps28     | 0.435 | -2.297 | vacuolar protein sorting 28 homolog (S. cerevisiae) (VPS28), transcript variant 1, mRNA.                                                              |
| rbms2     | 0.435 | -2.297 | RNA binding motif, single stranded interacting protein 2 (RBMS2), mRNA.                                                                               |
| stc1      | 0.435 | -2.298 | stanniocalcin 1 (STC1), mRNA.                                                                                                                         |
| c11orf70  | 0.435 | -2.298 | chromosome 11 open reading frame 70 (C11orf70), mRNA.                                                                                                 |
| loc642033 | 0.435 | -2.298 | PREDICTED: similar to ATP-binding cassette, sub-family F, member 1 isoform b (LOC642033), mRNA.                                                       |
| znf148    | 0.435 | -2.298 | zinc finger protein 148 (ZNF148), mRNA.                                                                                                               |
| gbl       | 0.435 | -2.298 | G protein beta subunit-like (GBL), mRNA.                                                                                                              |
| dap3      | 0.435 | -2.299 | death associated protein 3 (DAP3), nuclear gene encoding mitochondrial protein, transcript variant 1, mRNA.                                           |
| ngly1     | 0.435 | -2.299 | N-glycanase 1 (NGLY1), mRNA.                                                                                                                          |
| cep68     | 0.435 | -2.299 | centrosomal protein 68kDa (CEP68), mRNA.                                                                                                              |
| nol6      | 0.435 | -2.299 | nucleolar protein family 6 (RNA-associated) (NOL6), transcript variant alpha, mRNA.                                                                   |

|           |       |                                                                                                                           |
|-----------|-------|---------------------------------------------------------------------------------------------------------------------------|
| snw1      | 0.435 | -2.299 SNW domain containing 1 (SNW1), mRNA.                                                                              |
| cul5      | 0.435 | -2.299 cullin 5 (CUL5), mRNA.                                                                                             |
| ifnar2    | 0.435 | -2.3 interferon (alpha, beta and omega) receptor 2 (IFNAR2), transcript variant 3, mRNA.                                  |
| gnb2      | 0.435 | -2.3 guanine nucleotide binding protein (G protein), beta polypeptide 2 (GNB2), mRNA.                                     |
| ndufs4    | 0.435 | -2.3 NADH dehydrogenase (ubiquinone) Fe-S protein 4, 18kDa (NADH-coenzyme Q reductase) (NDUFS4), mRNA.                    |
| c1qdc1    | 0.435 | -2.3 caprin family member 2 (CAPRIN2), transcript variant 2, mRNA.                                                        |
| ttc15     | 0.435 | -2.3 tetratricopeptide repeat domain 15 (TTC15), mRNA.                                                                    |
| tpst1     | 0.435 | -2.3 tyrosylprotein sulfotransferase 1 (TPST1), mRNA.                                                                     |
| map3k2    | 0.435 | -2.3 PREDICTED: mitogen-activated protein kinase kinase kinase 2, transcript variant 3 (MAP3K2), mRNA.                    |
| pdc6      | 0.435 | -2.3 programmed cell death 6 (PDC6), mRNA.                                                                                |
| terf1     | 0.435 | -2.301 telomeric repeat binding factor (NIMA-interacting) 1 (TERF1), transcript variant 2, mRNA.                          |
| osbpl7    | 0.435 | -2.301 oxysterol binding protein-like 7 (OSBPL7), transcript variant 1, mRNA.                                             |
| mtp18     | 0.435 | -2.301 mitochondrial protein 18 kDa (MTP18), nuclear gene encoding mitochondrial protein, transcript variant 1, mRNA.     |
| bcar1     | 0.435 | -2.301 breast cancer anti-estrogen resistance 1 (BCAR1), mRNA.                                                            |
| iqsec1    | 0.434 | -2.302 IQ motif and Sec7 domain 1 (IQSEC1), mRNA.                                                                         |
| f8a1      | 0.434 | -2.302 coagulation factor VIII-associated (intronic transcript) 1 (F8A1), mRNA.                                           |
| c12orf23  | 0.434 | -2.302 chromosome 12 open reading frame 23 (C12orf23), mRNA.                                                              |
| abcb6     | 0.434 | -2.302 ATP-binding cassette, sub-family B (MDR/TAP), member 6 (ABCB6), nuclear gene encoding mitochondrial protein, mRNA. |
| gng10     | 0.434 | -2.303 guanine nucleotide binding protein (G protein), gamma 10 (GNG10), mRNA.                                            |
| kdelr3    | 0.434 | -2.303 KDEL (Lys-Asp-Glu-Leu) endoplasmic reticulum protein retention receptor 3 (KDEL3), transcript variant 2, mRNA.     |
| loc441019 | 0.434 | -2.303 PREDICTED: hypothetical LOC441019 (LOC441019), mRNA.                                                               |
| ddx23     | 0.434 | -2.304 DEAD (Asp-Glu-Ala-Asp) box polypeptide 23 (DDX23), mRNA.                                                           |
| eef1e1    | 0.434 | -2.304 eukaryotic translation elongation factor 1 epsilon 1 (EEF1E1), mRNA.                                               |
| hs.348514 | 0.434 | -2.304 Homo sapiens, clone IMAGE:4052238, mRNA, partial cds                                                               |
| sfrs5     | 0.434 | -2.304 splicing factor, arginine/serine-rich 5 (SFRS5), transcript variant 2, mRNA.                                       |
| znf217    | 0.434 | -2.305 zinc finger protein 217 (ZNF217), mRNA.                                                                            |
| il11      | 0.434 | -2.305 interleukin 11 (IL11), mRNA.                                                                                       |
| jtv1      | 0.434 | -2.305 JTV1 gene (JTV1), mRNA.                                                                                            |
| rnase4    | 0.434 | -2.306 ribonuclease, RNase A family, 4 (RNASE4), transcript variant 1, mRNA.                                              |
| pdhx      | 0.434 | -2.306 pyruvate dehydrogenase complex, component X (PDHX), mRNA.                                                          |
| abhd14a   | 0.434 | -2.306 abhydrolase domain containing 14A (ABHD14A), mRNA.                                                                 |
| flna      | 0.434 | -2.306 filamin A, alpha (actin binding protein 280) (FLNA), mRNA.                                                         |
| wdr40a    | 0.433 | -2.307 WD repeat domain 40A (WDR40A), mRNA.                                                                               |
| loc644033 | 0.433 | -2.307 PREDICTED: similar to similar to RPL23AP7 protein (LOC644033), mRNA.                                               |
| cdc42bpb  | 0.433 | -2.308 CDC42 binding protein kinase beta (DMPK-like) (CDC42BPB), mRNA.                                                    |
| rad23a    | 0.433 | -2.308 RAD23 homolog A (S. cerevisiae) (RAD23A), mRNA.                                                                    |
| acin1     | 0.433 | -2.308 apoptotic chromatin condensation inducer 1 (ACIN1), mRNA.                                                          |
| ptd008    | 0.433 | -2.309 chromosome 19 open reading frame 56 (C19orf56), mRNA.                                                              |
| ap2b1     | 0.433 | -2.309 adaptor-related protein complex 2, beta 1 subunit (AP2B1), transcript variant 2, mRNA.                             |
| hnrpc     | 0.433 | -2.309 heterogeneous nuclear ribonucleoprotein C (C1/C2) (HNRPC), transcript variant 3, mRNA.                             |
| g3bp1     | 0.433 | -2.309 GTPase activating protein (SH3 domain) binding protein 1 (G3BP1), transcript variant 2, mRNA.                      |

|           |       |                                                                                                               |
|-----------|-------|---------------------------------------------------------------------------------------------------------------|
| loc652864 | 0.433 | -2.309 PREDICTED: similar to Mitochondrial import inner membrane translocase subunit Tim23 (LOC652864), mRNA. |
| mccc1     | 0.433 | -2.31 methylcrotonoyl-Coenzyme A carboxylase 1 (alpha) (MCCC1), mRNA.                                         |
| dmap1     | 0.433 | -2.31 DNA methyltransferase 1 associated protein 1 (DMAP1), transcript variant 3, mRNA.                       |
| mrps7     | 0.433 | -2.31 mitochondrial ribosomal protein S7 (MRPS7), nuclear gene encoding mitochondrial protein, mRNA.          |
| ier3ip1   | 0.433 | -2.31 immediate early response 3 interacting protein 1 (IER3IP1), mRNA.                                       |
| gfpt1     | 0.433 | -2.31 glutamine-fructose-6-phosphate transaminase 1 (GFPT1), mRNA.                                            |
| usp10     | 0.433 | -2.31 ubiquitin specific peptidase 10 (USP10), mRNA.                                                          |
| thnsl1    | 0.433 | -2.311 threonine synthase-like 1 (bacterial) (THNSL1), mRNA.                                                  |
| slc25a37  | 0.433 | -2.311 solute carrier family 25, member 37 (SLC25A37), transcript variant 1, mRNA.                            |
| pdia5     | 0.433 | -2.312 protein disulfide isomerase family A, member 5 (PDIA5), mRNA.                                          |
| wnk1      | 0.432 | -2.313 WNK lysine deficient protein kinase 1 (WNK1), mRNA.                                                    |
| hspc171   | 0.432 | -2.313 HSPC171 protein (HSPC171), mRNA.                                                                       |
| vps33b    | 0.432 | -2.313 vacuolar protein sorting 33B (yeast) (VPS33B), mRNA.                                                   |
| flj22709  | 0.432 | -2.314 occludin/ELL domain containing 1 (OCEL1), mRNA.                                                        |
| upf3a     | 0.432 | -2.314 UPF3 regulator of nonsense transcripts homolog A (yeast) (UPF3A), transcript variant 2, mRNA.          |
| pkmyt1    | 0.432 | -2.315 protein kinase, membrane associated tyrosine/threonine 1 (PKMYT1), transcript variant 2, mRNA.         |
| msh6      | 0.432 | -2.315 mutS homolog 6 (E. coli) (MSH6), mRNA.                                                                 |
| git1      | 0.432 | -2.315 G protein-coupled receptor kinase interactor 1 (GIT1), mRNA.                                           |
| hs.334831 | 0.432 | -2.315 mRNA; cDNA DKFZp686I05206 (from clone DKFZp686I05206)                                                  |
| slc41a1   | 0.432 | -2.316 solute carrier family 41, member 1 (SLC41A1), mRNA.                                                    |
| naca      | 0.432 | -2.316 nascent-polypeptide-associated complex alpha polypeptide (NACA), mRNA.                                 |
| rexo4     | 0.432 | -2.316 REX4, RNA exonuclease 4 homolog (S. cerevisiae) (REXO4), mRNA.                                         |
| rnf26     | 0.432 | -2.316 ring finger protein 26 (RNF26), mRNA.                                                                  |
| ccdc25    | 0.432 | -2.316 coiled-coil domain containing 25 (CCDC25), transcript variant 2, mRNA.                                 |
| nupl2     | 0.432 | -2.317 nucleoporin like 2 (NUPL2), mRNA.                                                                      |
| loc133619 | 0.432 | -2.317 proline-rich coiled-coil 1 (PRRC1), mRNA.                                                              |
| commd6    | 0.432 | -2.317 COMM domain containing 6 (COMM6), transcript variant 1, mRNA.                                          |
| afg3l1    | 0.432 | -2.317 AFG3 ATPase family gene 3-like 1 (S. cerevisiae) (AFG3L1) on chromosome 16.                            |
| mea1      | 0.432 | -2.317 male-enhanced antigen 1 (MEA1), mRNA.                                                                  |
| xylt2     | 0.432 | -2.317 xylosyltransferase II (XYLT2), mRNA.                                                                   |
| loc400566 | 0.432 | -2.317 hypothetical gene supported by AK128660 (LOC400566), mRNA.                                             |
| sfrs14    | 0.432 | -2.317 splicing factor, arginine/serine-rich 14 (SFRS14), transcript variant 1, mRNA.                         |
| ppt1      | 0.432 | -2.318 palmitoyl-protein thioesterase 1 (ceroid-lipofuscinosis, neuronal 1, infantile) (PPT1), mRNA.          |
| tnfsf12   | 0.431 | -2.318 tumor necrosis factor (ligand) superfamily, member 12 (TNFSF12), transcript variant 2, mRNA.           |
| dctn5     | 0.431 | -2.318 dynactin 5 (p25) (DCTN5), mRNA.                                                                        |
| cyb561d2  | 0.431 | -2.318 cytochrome b-561 domain containing 2 (CYB561D2), mRNA.                                                 |
| znf329    | 0.431 | -2.318 zinc finger protein 329 (ZNF329), mRNA.                                                                |
| bxdc5     | 0.431 | -2.318 brix domain containing 5 (BXDC5), mRNA.                                                                |
| kiaa0195  | 0.431 | -2.318 KIAA0195 (KIAA0195), mRNA.                                                                             |
| traip     | 0.431 | -2.318 TRAF interacting protein (TRAIIP), mRNA.                                                               |
| tnfsf9    | 0.431 | -2.318 tumor necrosis factor (ligand) superfamily, member 9 (TNFSF9), mRNA.                                   |
| kua       | 0.431 | -2.319 ubiquitin-conjugating enzyme variant Kua (Kua), mRNA.                                                  |

|          |       |        |                                                                                                                                                                                        |
|----------|-------|--------|----------------------------------------------------------------------------------------------------------------------------------------------------------------------------------------|
| lig1     | 0.431 | -2.319 | ligase I, DNA, ATP-dependent (LIG1), mRNA.                                                                                                                                             |
| ccnh     | 0.431 | -2.319 | cyclin H (CCNH), mRNA.                                                                                                                                                                 |
| rbm4     | 0.431 | -2.319 | PREDICTED: RNA binding motif protein 4, transcript variant 3 (RBM4), mRNA.                                                                                                             |
| cdca3    | 0.431 | -2.319 | cell division cycle associated 3 (CDCA3), mRNA.                                                                                                                                        |
| mgc21881 | 0.431 | -2.319 | hypothetical protein MGC21881 (MGC21881), mRNA.                                                                                                                                        |
| nbpf11   | 0.431 | -2.32  | neuroblastoma breakpoint family, member 11 (NBPF11), mRNA.                                                                                                                             |
| cthrc1   | 0.431 | -2.32  | collagen triple helix repeat containing 1 (CTHRC1), mRNA.                                                                                                                              |
| ccdc45   | 0.431 | -2.32  | coiled-coil domain containing 45 (CCDC45), mRNA.                                                                                                                                       |
| c1orf163 | 0.431 | -2.321 | chromosome 1 open reading frame 163 (C1orf163), mRNA.                                                                                                                                  |
| fbxo2    | 0.431 | -2.321 | F-box protein 2 (FBXO2), mRNA.                                                                                                                                                         |
| cabc1    | 0.431 | -2.322 | chaperone, ABC1 activity of bc1 complex like ( <i>S. pombe</i> ) (CABC1), mRNA.                                                                                                        |
| hspc196  | 0.431 | -2.323 | transmembrane protein 138 (TMEM138), mRNA.                                                                                                                                             |
| hypb     | 0.431 | -2.323 | huntingtin interacting protein B (HYPB), transcript variant 2, mRNA.                                                                                                                   |
| c17orf65 | 0.43  | -2.323 | chromosome 17 open reading frame 65 (C17orf65), mRNA.                                                                                                                                  |
| chchd8   | 0.43  | -2.323 | coiled-coil-helix-coiled-coil-helix domain containing 8 (CHCHD8), mRNA.                                                                                                                |
| foxq1    | 0.43  | -2.323 | forkhead box Q1 (FOXQ1), mRNA.                                                                                                                                                         |
| atp5o    | 0.43  | -2.323 | ATP synthase, H <sup>+</sup> transporting, mitochondrial F1 complex, O subunit (oligomycin sensitivity conferring protein) (ATP5O), nuclear gene encoding mitochondrial protein, mRNA. |
| elovl6   | 0.43  | -2.323 | ELOVL family member 6, elongation of long chain fatty acids (FEN1/Elo2, SUR4/Elo3-like, yeast) (ELOVL6), mRNA.                                                                         |
| clip2    | 0.43  | -2.324 | CAP-GLY domain containing linker protein 2 (CLIP2), transcript variant 2, mRNA.                                                                                                        |
| syf2     | 0.43  | -2.324 | SYF2 homolog, RNA splicing factor ( <i>S. cerevisiae</i> ) (SYF2), transcript variant 1, mRNA.                                                                                         |
| pank2    | 0.43  | -2.324 | pantothenate kinase 2 (Hallervorden-Spatz syndrome) (PANK2), transcript variant 5, mRNA.                                                                                               |
| stk36    | 0.43  | -2.324 | serine/threonine kinase 36, fused homolog ( <i>Drosophila</i> ) (STK36), mRNA.                                                                                                         |
| sh3bgrl  | 0.43  | -2.325 | SH3 domain binding glutamic acid-rich protein like (SH3BGRL), mRNA.                                                                                                                    |
| commd7   | 0.43  | -2.325 | COMM domain containing 7 (COMMD7), mRNA.                                                                                                                                               |
| drev1    | 0.43  | -2.325 | DORA reverse strand protein 1 (DREV1), mRNA.                                                                                                                                           |
| neu1     | 0.43  | -2.326 | sialidase 1 (lysosomal sialidase) (NEU1), mRNA.                                                                                                                                        |
| erp29    | 0.43  | -2.326 | endoplasmic reticulum protein 29 (ERP29), transcript variant 2, mRNA.                                                                                                                  |
| afg3l2   | 0.43  | -2.326 | AFG3 ATPase family gene 3-like 2 (yeast) (AFG3L2), nuclear gene encoding mitochondrial protein, mRNA.                                                                                  |
| giyd1    | 0.43  | -2.327 | GIY-YIG domain containing 1 (GIYD1), transcript variant 1, mRNA.                                                                                                                       |
| irf2bp2  | 0.43  | -2.327 | interferon regulatory factor 2 binding protein 2 (IRF2BP2), mRNA.                                                                                                                      |
| rnu14    | 0.43  | -2.327 | small nucleolar RNA, C/D box 14A (SNORD14A) on chromosome 11.                                                                                                                          |
| sod2     | 0.43  | -2.327 | superoxide dismutase 2, mitochondrial (SOD2), nuclear gene encoding mitochondrial protein, transcript variant 1, mRNA.                                                                 |
| slc4a5   | 0.43  | -2.327 | solute carrier family 4, sodium bicarbonate cotransporter, member 5 (SLC4A5), transcript variant d, mRNA.                                                                              |
| c5orf5   | 0.43  | -2.328 | chromosome 5 open reading frame 5 (C5orf5), mRNA.                                                                                                                                      |
| kiaa1267 | 0.43  | -2.328 | KIAA1267 (KIAA1267), mRNA.                                                                                                                                                             |
| mrps35   | 0.43  | -2.328 | mitochondrial ribosomal protein S35 (MRPS35), nuclear gene encoding mitochondrial protein, mRNA.                                                                                       |
| coro1b   | 0.43  | -2.328 | coronin, actin binding protein, 1B (CORO1B), transcript variant 1, mRNA.                                                                                                               |
| gmppa    | 0.429 | -2.328 | GDP-mannose pyrophosphorylase A (GMPPA), transcript variant 2, mRNA.                                                                                                                   |
| fnbp1    | 0.429 | -2.329 | formin binding protein 1 (FNBP1), mRNA.                                                                                                                                                |
| znf18    | 0.429 | -2.329 | zinc finger protein 18 (ZNF18), mRNA.                                                                                                                                                  |

|             |       |        |                                                                                                                                            |
|-------------|-------|--------|--------------------------------------------------------------------------------------------------------------------------------------------|
| dkfzp762e13 | 0.429 | -2.329 | hypothetical protein DKFZp762E1312 (DKFZp762E1312), mRNA.                                                                                  |
| s100a11     | 0.429 | -2.329 | S100 calcium binding protein A11 (S100A11), mRNA.                                                                                          |
| nfil3       | 0.429 | -2.33  | nuclear factor, interleukin 3 regulated (NFIL3), mRNA.                                                                                     |
| nfkfb2      | 0.429 | -2.33  | nuclear factor of kappa light polypeptide gene enhancer in B-cells 2 (p49/p100) (NFKB2), transcript variant 1, mRNA.                       |
| mfn2        | 0.429 | -2.33  | mitofusin 2 (MFN2), nuclear gene encoding mitochondrial protein, mRNA.                                                                     |
| tcta        | 0.429 | -2.33  | T-cell leukemia translocation altered gene (TCTA), mRNA.                                                                                   |
| arf1        | 0.429 | -2.331 | ADP-ribosylation factor 1 (ARF1), transcript variant 3, mRNA.                                                                              |
| tlcd1       | 0.429 | -2.331 | TLC domain containing 1 (TLCD1), mRNA.                                                                                                     |
| c20orf116   | 0.429 | -2.331 | chromosome 20 open reading frame 116 (C20orf116), mRNA.                                                                                    |
| hsd17b4     | 0.429 | -2.331 | hydroxysteroid (17-beta) dehydrogenase 4 (HSD17B4), mRNA.                                                                                  |
| atpaf1      | 0.429 | -2.331 | ATP synthase mitochondrial F1 complex assembly factor 1 (ATPAF1), nuclear gene encoding mitochondrial protein, transcript variant 2, mRNA. |
| flj21127    | 0.429 | -2.331 | tectonic (FLJ21127), mRNA.                                                                                                                 |
| ei24        | 0.429 | -2.332 | etoposide induced 2.4 mRNA (EI24), transcript variant 1, mRNA.                                                                             |
| comtd1      | 0.429 | -2.332 | catechol-O-methyltransferase domain containing 1 (COMTD1), mRNA.                                                                           |
| mcm2        | 0.429 | -2.332 | MCM2 minichromosome maintenance deficient 2, mitotin ( <i>S. cerevisiae</i> ) (MCM2), mRNA.                                                |
| pop7        | 0.429 | -2.333 | processing of precursor 7, ribonuclease P subunit ( <i>S. cerevisiae</i> ) (POP7), mRNA.                                                   |
| c14orf78    | 0.429 | -2.333 | PREDICTED: chromosome 14 open reading frame 78, transcript variant 1 (C14orf78), mRNA.                                                     |
| mmp24       | 0.429 | -2.333 | matrix metalloproteinase 24 (membrane-inserted) (MMP24), mRNA.                                                                             |
| tspan33     | 0.429 | -2.333 | tetraspanin 33 (TSPAN33), mRNA.                                                                                                            |
| mgc72104    | 0.429 | -2.333 | similar to FRG1 protein (FSHD region gene 1 protein) (MGC72104), mRNA.                                                                     |
| mrfap1l1    | 0.429 | -2.334 | Morf4 family associated protein 1-like 1 (MRFAP1L1), transcript variant 1, mRNA.                                                           |
| rab22a      | 0.428 | -2.334 | RAB22A, member RAS oncogene family (RAB22A), mRNA.                                                                                         |
| loc653879   | 0.428 | -2.334 | PREDICTED: similar to Complement C3 precursor (LOC653879), mRNA.                                                                           |
| bet1        | 0.428 | -2.334 | BET1 homolog ( <i>S. cerevisiae</i> ) (BET1), mRNA.                                                                                        |
| osbpl10     | 0.428 | -2.335 | oxysterol binding protein-like 10 (OSBPL10), mRNA.                                                                                         |
| tiprl       | 0.428 | -2.335 | TIP41, TOR signalling pathway regulator-like ( <i>S. cerevisiae</i> ) (TIPRL), transcript variant 1, mRNA.                                 |
| hs.143018   | 0.428 | -2.335 | BX105338 Soares_pregnant_uterus_NbHPU cDNA clone IMAGp998C114347, mRNA sequence                                                            |
| pes1        | 0.428 | -2.335 | pescadillo homolog 1, containing BRCT domain (zebrafish) (PES1), mRNA.                                                                     |
| apex2       | 0.428 | -2.335 | APEX nuclease (apurinic/aprimidinic endonuclease) 2 (APEX2), nuclear gene encoding mitochondrial protein, mRNA.                            |
| dennd4c     | 0.428 | -2.335 | DENN/MADD domain containing 4C (DENND4C), mRNA.                                                                                            |
| polr3k      | 0.428 | -2.336 | polymerase (RNA) III (DNA directed) polypeptide K, 12.3 kDa (POLR3K), mRNA.                                                                |
| gmfb        | 0.428 | -2.336 | glia maturation factor, beta (GMFB), mRNA.                                                                                                 |
| ftsj3       | 0.428 | -2.336 | FtsJ homolog 3 ( <i>E. coli</i> ) (FTSJ3), mRNA.                                                                                           |
| fars2       | 0.428 | -2.336 | phenylalanine-tRNA synthetase 2 (mitochondrial) (FARS2), nuclear gene encoding mitochondrial protein, mRNA.                                |
| ass         | 0.428 | -2.336 | argininosuccinate synthetase (ASS), transcript variant 2, mRNA.                                                                            |
| wdr62       | 0.428 | -2.337 | WD repeat domain 62 (WDR62), mRNA.                                                                                                         |
| oxsm        | 0.428 | -2.337 | 3-oxoacyl-ACP synthase, mitochondrial (OXSM), mRNA.                                                                                        |
| kcnn4       | 0.428 | -2.337 | potassium intermediate/small conductance calcium-activated channel, subfamily N, member 4 (KCNN4), mRNA.                                   |
| kidins220   | 0.428 | -2.337 | kinase D-interacting substrate of 220 kDa (KIDINS220), mRNA.                                                                               |

|           |       |                                                                                                                           |
|-----------|-------|---------------------------------------------------------------------------------------------------------------------------|
| mtx3      | 0.428 | -2.338 metaxin 3 (MTX3), mRNA.                                                                                            |
| mrps31    | 0.428 | -2.338 mitochondrial ribosomal protein S31 (MRPS31), nuclear gene encoding mitochondrial protein, mRNA.                   |
| mgc3121   | 0.428 | -2.338 proline rich 14 (PRR14), mRNA.                                                                                     |
| spata18   | 0.428 | -2.338 spermatogenesis associated 18 homolog (rat) (SPATA18), mRNA.                                                       |
| pcsk1n    | 0.428 | -2.338 proprotein convertase subtilisin/kexin type 1 inhibitor (PCSK1N), mRNA.                                            |
| tim8b     | 0.428 | -2.338 translocase of inner mitochondrial membrane 8 homolog B (yeast) (TIMM8B), mRNA.                                    |
| ugcg12    | 0.428 | -2.338 UDP-glucose ceramide glucosyltransferase-like 2 (UGCGL2), mRNA.                                                    |
| serpinb1  | 0.428 | -2.338 serpin peptidase inhibitor, clade B (ovalbumin), member 1 (SERPINB1), mRNA.                                        |
| kiaa0391  | 0.428 | -2.338 KIAA0391 (KIAA0391), mRNA.                                                                                         |
| h1fx      | 0.428 | -2.339 H1 histone family, member X (H1FX), mRNA.                                                                          |
| neto2     | 0.428 | -2.339 neuropilin (NRP) and tolloid (TLL)-like 2 (NETO2), mRNA.                                                           |
| plp2      | 0.427 | -2.339 proteolipid protein 2 (colonic epithelium-enriched) (PLP2), mRNA.                                                  |
| kiaa1468  | 0.427 | -2.34 KIAA1468 (KIAA1468), mRNA.                                                                                          |
| rnf31     | 0.427 | -2.34 ring finger protein 31 (RNF31), mRNA.                                                                               |
| mpv17     | 0.427 | -2.34 MpV17 transgene, murine homolog, glomerulosclerosis (MPV17), mRNA.                                                  |
| ric8a     | 0.427 | -2.34 resistance to inhibitors of cholinesterase 8 homolog A (C. elegans) (RIC8A), mRNA.                                  |
| rrbp1     | 0.427 | -2.341 ribosome binding protein 1 homolog 180kDa (dog) (RRBP1), transcript variant 1, mRNA.                               |
| polr2b    | 0.427 | -2.342 polymerase (RNA) II (DNA directed) polypeptide B, 140kDa (POLR2B), mRNA.                                           |
| hint2     | 0.427 | -2.342 histidine triad nucleotide binding protein 2 (HINT2), mRNA.                                                        |
| mapk12    | 0.427 | -2.342 mitogen-activated protein kinase 12 (MAPK12), mRNA.                                                                |
| pold4     | 0.427 | -2.342 polymerase (DNA-directed), delta 4 (POLD4), mRNA.                                                                  |
| spag7     | 0.427 | -2.343 sperm associated antigen 7 (SPAG7), mRNA.                                                                          |
| cand1     | 0.427 | -2.343 cullin-associated and neddylation-dissociated 1 (CAND1), mRNA.                                                     |
| ganab     | 0.427 | -2.343 glucosidase, alpha; neutral AB (GANAB), transcript variant 2, mRNA.                                                |
| angel2    | 0.427 | -2.343 angel homolog 2 (Drosophila) (ANGEL2), mRNA.                                                                       |
| tfpi      | 0.427 | -2.344 tissue factor pathway inhibitor (lipoprotein-associated coagulation inhibitor) (TFPI), transcript variant 1, mRNA. |
| rpl31     | 0.427 | -2.344 ribosomal protein L31 (RPL31), mRNA.                                                                               |
| mki67     | 0.426 | -2.345 antigen identified by monoclonal antibody Ki-67 (MKI67), mRNA.                                                     |
| rbx1      | 0.426 | -2.345 ring-box 1 (RBX1), mRNA.                                                                                           |
| rragc     | 0.426 | -2.345 Ras-related GTP binding C (RRAGC), mRNA.                                                                           |
| trmt1     | 0.426 | -2.345 TRM1 tRNA methyltransferase 1 homolog (S. cerevisiae) (TRMT1), mRNA.                                               |
| exosc8    | 0.426 | -2.346 exosome component 8 (EXOSC8), mRNA.                                                                                |
| 5-Mar     | 0.426 | -2.346 membrane-associated ring finger (C3HC4) 5 (MARCH5), mRNA.                                                          |
| akap13    | 0.426 | -2.346 A kinase (PRKA) anchor protein 13 (AKAP13), transcript variant 2, mRNA.                                            |
| tm9sf1    | 0.426 | -2.347 transmembrane 9 superfamily member 1 (TM9SF1), transcript variant 2, mRNA.                                         |
| nudt16l1  | 0.426 | -2.347 nudix (nucleoside diphosphate linked moiety X)-type motif 16-like 1 (NUDT16L1), mRNA.                              |
| loc113386 | 0.426 | -2.347 similar to envelope protein (LOC113386), mRNA.                                                                     |
| rps20     | 0.426 | -2.347 ribosomal protein S20 (RPS20), mRNA.                                                                               |
| myo1e     | 0.426 | -2.347 myosin IE (MYO1E), mRNA.                                                                                           |
| jmjd1c    | 0.426 | -2.348 jumonji domain containing 1C (JMJD1C), transcript variant 1, mRNA.                                                 |
| scc-112   | 0.426 | -2.349 PDS5, regulator of cohesion maintenance, homolog A (S. cerevisiae) (PDS5A), mRNA.                                  |
| rps18     | 0.426 | -2.349 ribosomal protein S18 (RPS18), mRNA.                                                                               |

|           |       |                                                                                                                                                |
|-----------|-------|------------------------------------------------------------------------------------------------------------------------------------------------|
| plod3     | 0.426 | -2.349 procollagen-lysine, 2-oxoglutarate 5-dioxygenase 3 (PLOD3), mRNA.                                                                       |
| avpi1     | 0.426 | -2.349 arginine vasopressin-induced 1 (AVPI1), mRNA.                                                                                           |
| usp14     | 0.426 | -2.349 ubiquitin specific peptidase 14 (tRNA-guanine transglycosylase) (USP14), transcript variant 2, mRNA.                                    |
| u2af1     | 0.426 | -2.349 U2 small nuclear RNA auxiliary factor 1 (U2AF1), transcript variant b, mRNA.                                                            |
| cdk5rap2  | 0.426 | -2.35 CDK5 regulatory subunit associated protein 2 (CDK5RAP2), transcript variant 1, mRNA.                                                     |
| ift20     | 0.426 | -2.35 intraflagellar transport 20 homolog (Chlamydomonas) (IFT20), mRNA.                                                                       |
| glb1      | 0.426 | -2.35 galactosidase, beta 1 (GLB1), transcript variant 179423, mRNA.                                                                           |
| pea15     | 0.426 | -2.35 phosphoprotein enriched in astrocytes 15 (PEA15), mRNA.                                                                                  |
| smarcd3   | 0.426 | -2.35 SWI/SNF related, matrix associated, actin dependent regulator of chromatin, subfamily d, member 3 (SMARCD3), transcript variant 2, mRNA. |
| mnd1      | 0.425 | -2.35 meiotic nuclear divisions 1 homolog ( <i>S. cerevisiae</i> ) (MND1), mRNA.                                                               |
| id3       | 0.425 | -2.351 inhibitor of DNA binding 3, dominant negative helix-loop-helix protein (ID3), mRNA.                                                     |
| cdc25b    | 0.425 | -2.351 cell division cycle 25B (CDC25B), transcript variant 4, mRNA.                                                                           |
| smo       | 0.425 | -2.351 smoothed homolog ( <i>Drosophila</i> ) (SMO), mRNA.                                                                                     |
| tmem150   | 0.425 | -2.351 transmembrane protein 150 (TMEM150), transcript variant 1, mRNA.                                                                        |
| cuta      | 0.425 | -2.352 cutA divalent cation tolerance homolog ( <i>E. coli</i> ) (CUTA), transcript variant 2, mRNA.                                           |
| iqwd1     | 0.425 | -2.353 IQ motif and WD repeats 1 (IQWD1), transcript variant 2, mRNA.                                                                          |
| kiaa1840  | 0.425 | -2.353 KIAA1840 (KIAA1840), mRNA.                                                                                                              |
| faf1      | 0.425 | -2.353 Fas (TNFRSF6) associated factor 1 (FAF1), mRNA.                                                                                         |
| copg2     | 0.425 | -2.354 coatomer protein complex, subunit gamma 2 (COPG2), mRNA.                                                                                |
| pla2g4c   | 0.425 | -2.354 phospholipase A2, group IVC (cytosolic, calcium-independent) (PLA2G4C), mRNA.                                                           |
| lap3      | 0.425 | -2.354 leucine aminopeptidase 3 (LAP3), mRNA.                                                                                                  |
| hat1      | 0.425 | -2.354 histone acetyltransferase 1 (HAT1), transcript variant 1, mRNA.                                                                         |
| b3gnt6    | 0.425 | -2.355 UDP-GlcNAc:betaGal beta-1,3-N-acetylglucosaminyltransferase 6 (B3GNT6), mRNA.                                                           |
| loc653219 | 0.425 | -2.355 PREDICTED: similar to G antigen, family D, 2 isoform 1a, transcript variant 2 (LOC653219), mRNA.                                        |
| acat1     | 0.425 | -2.355 acetyl-Coenzyme A acetyltransferase 1 (acetoacetyl Coenzyme A thiolase) (ACAT1), nuclear gene encoding mitochondrial protein, mRNA.     |
| m-rip     | 0.424 | -2.356 myosin phosphatase-Rho interacting protein (M-RIP), transcript variant 2, mRNA.                                                         |
| nhs       | 0.424 | -2.356 PREDICTED: Nance-Horan syndrome (congenital cataracts and dental anomalies), transcript variant 3 (NHS), mRNA.                          |
| cdc2l5    | 0.424 | -2.357 cell division cycle 2-like 5 (cholinesterase-related cell division controller) (CDC2L5), transcript variant 1, mRNA.                    |
| sdf1      | 0.424 | -2.357 stromal cell derived factor receptor 1 (SDFR1), transcript variant beta, mRNA.                                                          |
| pigs      | 0.424 | -2.359 phosphatidylinositol glycan anchor biosynthesis, class S (PIGS), mRNA.                                                                  |
| efna1     | 0.424 | -2.359 ephrin-A1 (EFNA1), transcript variant 1, mRNA.                                                                                          |
| igf2bp2   | 0.424 | -2.36 insulin-like growth factor 2 mRNA binding protein 2 (IGF2BP2), transcript variant 1, mRNA.                                               |
| lipa      | 0.424 | -2.36 lipase A, lysosomal acid, cholesterol esterase (Wolman disease) (LIPA), mRNA.                                                            |
| hoxb7     | 0.424 | -2.361 homeo box B7 (HOXB7), mRNA.                                                                                                             |
| loc644850 | 0.424 | -2.361 PREDICTED: similar to phosducin-like 3 (LOC644850), mRNA.                                                                               |
| cyb5d2    | 0.423 | -2.362 cytochrome b5 domain containing 2 (CYB5D2), mRNA.                                                                                       |
| phkg2     | 0.423 | -2.362 phosphorylase kinase, gamma 2 (testis) (PHKG2), mRNA.                                                                                   |
| timm8a    | 0.423 | -2.362 translocase of inner mitochondrial membrane 8 homolog A (yeast) (TIMM8A), nuclear gene encoding mitochondrial protein, mRNA.            |
| c12orf5   | 0.423 | -2.363 chromosome 12 open reading frame 5 (C12orf5), mRNA.                                                                                     |

|             |       |                                                                                                                     |
|-------------|-------|---------------------------------------------------------------------------------------------------------------------|
| cox6c       | 0.423 | -2.363 cytochrome c oxidase subunit VIc (COX6C), mRNA.                                                              |
| pmm1        | 0.423 | -2.363 phosphomannomutase 1 (PMM1), mRNA.                                                                           |
| dkfzp564b14 | 0.423 | -2.364 PREDICTED: DKFZP564B147 protein, transcript variant 10 (DKFZP564B147), misc RNA.                             |
| c6orf173    | 0.423 | -2.364 chromosome 6 open reading frame 173 (C6orf173), mRNA.                                                        |
| loc643516   | 0.423 | -2.364 PREDICTED: similar to 40S ribosomal protein S26 (LOC643516), mRNA.                                           |
| isg20l2     | 0.423 | -2.364 interferon stimulated exonuclease gene 20kDa-like 2 (ISG20L2), mRNA.                                         |
| sco2        | 0.423 | -2.364 SCO cytochrome oxidase deficient homolog 2 (yeast) (SCO2), nuclear gene encoding mitochondrial protein, mRNA |
| nap1l1      | 0.423 | -2.364 nucleosome assembly protein 1-like 1 (NAP1L1), transcript variant 1, mRNA.                                   |
| ythdf1      | 0.423 | -2.364 YTH domain family, member 1 (YTHDF1), mRNA.                                                                  |
| cdca5       | 0.423 | -2.364 cell division cycle associated 5 (CDCA5), mRNA.                                                              |
| rnf167      | 0.423 | -2.365 ring finger protein 167 (RNF167), mRNA.                                                                      |
| surf1       | 0.423 | -2.365 surf1 (SURF1), nuclear gene encoding mitochondrial protein, mRNA.                                            |
| casp6       | 0.423 | -2.366 caspase 6, apoptosis-related cysteine peptidase (CASP6), transcript variant beta, mRNA.                      |
| hla-dma     | 0.423 | -2.366 major histocompatibility complex, class II, DM alpha (HLA-DMA), mRNA.                                        |
| n-pac       | 0.423 | -2.366 cytokine-like nuclear factor n-pac (N-PAC), mRNA.                                                            |
| txlna       | 0.423 | -2.366 taxilin alpha (TXLNA), mRNA.                                                                                 |
| scpep1      | 0.423 | -2.366 serine carboxypeptidase 1 (SCPEP1), mRNA.                                                                    |
| ptov1       | 0.423 | -2.366 prostate tumor overexpressed gene 1 (PTOV1), mRNA.                                                           |
| tmem91      | 0.423 | -2.367 transmembrane protein 91 (TMEM91), mRNA.                                                                     |
| ascc3l1     | 0.422 | -2.367 activating signal cointegrator 1 complex subunit 3-like 1 (ASCC3L1), mRNA.                                   |
| msto1       | 0.422 | -2.368 misato homolog 1 (Drosophila) (MSTO1), mRNA.                                                                 |
| c12orf29    | 0.422 | -2.369 chromosome 12 open reading frame 29 (C12orf29), mRNA.                                                        |
| bzw2        | 0.422 | -2.369 basic leucine zipper and W2 domains 2 (BZW2), mRNA.                                                          |
| crip2       | 0.422 | -2.369 cysteine-rich protein 2 (CRIP2), mRNA.                                                                       |
| fbxo30      | 0.422 | -2.369 F-box protein 30 (FBXO30), mRNA.                                                                             |
| bcap31      | 0.422 | -2.37 B-cell receptor-associated protein 31 (BCAP31), mRNA.                                                         |
| p8          | 0.422 | -2.37 p8 protein (candidate of metastasis 1) (P8), mRNA.                                                            |
| gatad2b     | 0.422 | -2.37 GATA zinc finger domain containing 2B (GATAD2B), mRNA.                                                        |
| nalp2       | 0.422 | -2.37 NLR family, pyrin domain containing 2 (NLRP2), mRNA.                                                          |
| znf480      | 0.422 | -2.371 zinc finger protein 480 (ZNF480), mRNA.                                                                      |
| xylb        | 0.422 | -2.371 xylulokinase homolog (H. influenzae) (XYLB), mRNA.                                                           |
| sub1        | 0.422 | -2.371 SUB1 homolog (S. cerevisiae) (SUB1), mRNA.                                                                   |
| trak2       | 0.422 | -2.372 trafficking protein, kinesin binding 2 (TRAK2), mRNA.                                                        |
| mgc16597    | 0.422 | -2.372 PREDICTED: similar to RIKEN cDNA 3110023B02, transcript variant 4 (MGC16597), mRNA.                          |
| abtb2       | 0.422 | -2.372 ankyrin repeat and BTB (POZ) domain containing 2 (ABTB2), mRNA.                                              |
| tgoln2      | 0.422 | -2.372 trans-golgi network protein 2 (TGOLN2), mRNA.                                                                |
| pygb        | 0.422 | -2.372 phosphorylase, glycogen; brain (PYGB), mRNA.                                                                 |
| rad50       | 0.421 | -2.373 RAD50 homolog (S. cerevisiae) (RAD50), transcript variant 1, mRNA.                                           |
| ddx55       | 0.421 | -2.373 DEAD (Asp-Glu-Ala-Asp) box polypeptide 55 (DDX55), mRNA.                                                     |
| c14orf94    | 0.421 | -2.373 chromosome 14 open reading frame 94 (C14orf94), mRNA.                                                        |
| loc653778   | 0.421 | -2.374 PREDICTED: similar to solute carrier family 25, member 37 (LOC653778), mRNA.                                 |
| gne         | 0.421 | -2.375 glucosamine (UDP-N-acetyl)-2-epimerase/N-acetylmannosamine kinase (GNE), mRNA.                               |



|           |       |        |                                                                                                                                                                         |
|-----------|-------|--------|-------------------------------------------------------------------------------------------------------------------------------------------------------------------------|
| arfgap1   | 0.421 | -2.375 | ADP-ribosylation factor GTPase activating protein 1 (ARFGAP1), transcript variant 2, mRNA.                                                                              |
| gbe1      | 0.421 | -2.375 | glucan (1,4-alpha-), branching enzyme 1 (glycogen branching enzyme, Andersen disease, glycogen storage disease type IV) (GBE1), mRNA.                                   |
| eif2ak2   | 0.421 | -2.375 | eukaryotic translation initiation factor 2-alpha kinase 2 (EIF2AK2), mRNA.                                                                                              |
| yeats4    | 0.421 | -2.375 | YEATS domain containing 4 (YEATS4), mRNA.                                                                                                                               |
| fam89b    | 0.421 | -2.375 | family with sequence similarity 89, member B (FAM89B), mRNA.                                                                                                            |
| chd1      | 0.421 | -2.375 | chromodomain helicase DNA binding protein 1 (CHD1), mRNA.                                                                                                               |
| edem1     | 0.421 | -2.375 | ER degradation enhancer, mannosidase alpha-like 1 (EDEM1), mRNA.                                                                                                        |
| etf1      | 0.421 | -2.375 | eukaryotic translation termination factor 1 (ETF1), mRNA.                                                                                                               |
| gna11     | 0.421 | -2.376 | guanine nucleotide binding protein (G protein), alpha 11 (Gq class) (GNA11), mRNA.                                                                                      |
| tial1     | 0.421 | -2.377 | TIA1 cytotoxic granule-associated RNA binding protein-like 1 (TIAL1), transcript variant 1, mRNA. XM_945560 XM_945564 XM_945566 XM_945569 XM_945570 XM_945572 XM_945573 |
| fto       | 0.421 | -2.377 | fat mass and obesity associated (FTO), mRNA.                                                                                                                            |
| ctsb      | 0.421 | -2.377 | cathepsin B (CTSB), transcript variant 1, mRNA.                                                                                                                         |
| pigh      | 0.421 | -2.377 | phosphatidylinositol glycan, class H (PIGH), mRNA.                                                                                                                      |
| park7     | 0.421 | -2.377 | Parkinson disease (autosomal recessive, early onset) 7 (PARK7), mRNA.                                                                                                   |
| mett10d   | 0.421 | -2.377 | methyltransferase 10 domain containing (METT10D), mRNA.                                                                                                                 |
| nrbp1     | 0.421 | -2.378 | nuclear receptor binding protein 1 (NRBP1), mRNA.                                                                                                                       |
| znf462    | 0.421 | -2.378 | zinc finger protein 462 (ZNF462), mRNA.                                                                                                                                 |
| ndufa7    | 0.421 | -2.378 | NADH dehydrogenase (ubiquinone) 1 alpha subcomplex, 7, 14.5kDa (NDUFA7), mRNA.                                                                                          |
| etnk1     | 0.421 | -2.378 | ethanolamine kinase 1 (ETNK1), mRNA.                                                                                                                                    |
| aldh7a1   | 0.42  | -2.378 | PREDICTED: aldehyde dehydrogenase 7 family, member A1 (ALDH7A1), mRNA.                                                                                                  |
| mlf2      | 0.42  | -2.379 | myeloid leukemia factor 2 (MLF2), mRNA.                                                                                                                                 |
| polr3gl   | 0.42  | -2.379 | polymerase (RNA) III (DNA directed) polypeptide G (32kD)-like (POLR3GL), mRNA.                                                                                          |
| herc2     | 0.42  | -2.38  | hect domain and RLD 2 (HERC2), mRNA.                                                                                                                                    |
| manbal    | 0.42  | -2.38  | mannosidase, beta A, lysosomal-like (MANBAL), transcript variant 2, mRNA.                                                                                               |
| yipf3     | 0.42  | -2.381 | Yip1 domain family, member 3 (YIPF3), mRNA.                                                                                                                             |
| ngfrap1   | 0.42  | -2.381 | nerve growth factor receptor (TNFRSF16) associated protein 1 (NGFRAP1), transcript variant 1, mRNA.                                                                     |
| birc5     | 0.42  | -2.382 | baculoviral IAP repeat-containing 5 (survivin) (BIRC5), transcript variant 3, mRNA.                                                                                     |
| ift74     | 0.42  | -2.382 | intraflagellar transport 74 homolog (Chlamydomonas) (IFT74), mRNA.                                                                                                      |
| yes1      | 0.42  | -2.383 | v-yes-1 Yamaguchi sarcoma viral oncogene homolog 1 (YES1), mRNA.                                                                                                        |
| znf271    | 0.42  | -2.383 | zinc finger protein 271 (ZNF271), mRNA.                                                                                                                                 |
| zdhhc6    | 0.42  | -2.383 | zinc finger, DHHC-type containing 6 (ZDHHC6), mRNA.                                                                                                                     |
| foxd1     | 0.419 | -2.384 | forkhead box D1 (FOXD1), mRNA.                                                                                                                                          |
| th1l      | 0.419 | -2.384 | TH1-like (Drosophila) (TH1L), transcript variant 2, mRNA.                                                                                                               |
| c13orf7   | 0.419 | -2.384 | chromosome 13 open reading frame 7 (C13orf7), mRNA.                                                                                                                     |
| gpx1      | 0.419 | -2.384 | glutathione peroxidase 1 (GPX1), transcript variant 2, mRNA.                                                                                                            |
| slc35b2   | 0.419 | -2.385 | solute carrier family 35, member B2 (SLC35B2), mRNA.                                                                                                                    |
| bat2      | 0.419 | -2.385 | HLA-B associated transcript 2 (BAT2), transcript variant 1, mRNA.                                                                                                       |
| c20orf191 | 0.419 | -2.386 | chromosome 20 open reading frame 191 (C20orf191), mRNA.                                                                                                                 |
| cuedc2    | 0.419 | -2.386 | CUE domain containing 2 (CUEDC2), mRNA.                                                                                                                                 |
| mlr2      | 0.419 | -2.386 | ligand-dependent corepressor (MLR2), mRNA.                                                                                                                              |

|             |       |        |                                                                                                                                                                                                         |
|-------------|-------|--------|---------------------------------------------------------------------------------------------------------------------------------------------------------------------------------------------------------|
| ptms        | 0.419 | -2.387 | parathymosin (PTMS), mRNA.                                                                                                                                                                              |
| chst12      | 0.419 | -2.387 | carbohydrate (chondroitin 4) sulfotransferase 12 (CHST12), mRNA.                                                                                                                                        |
| gcsH        | 0.419 | -2.387 | glycine cleavage system protein H (aminomethyl carrier) (GCSH), mRNA.                                                                                                                                   |
| loc648638   | 0.419 | -2.388 | PREDICTED: similar to Peptidyl-prolyl cis-trans isomerase NIMA-interacting 4 (Rotamase Pin4) (PPlase Pin4) (Parvulin 14) (Par14) (Peptidyl-prolyl cis/trans isomerase EPVH) (hPar14) (LOC648638), mRNA. |
| snhg5       | 0.419 | -2.389 | small nucleolar RNA host gene (non-protein coding) 5 (SNHG5) on chromosome 6.                                                                                                                           |
| loc285636   | 0.419 | -2.389 | hypothetical protein LOC285636 (LOC285636), mRNA.                                                                                                                                                       |
| cybasc3     | 0.418 | -2.391 | cytochrome b, ascorbate dependent 3 (CYBASC3), mRNA.                                                                                                                                                    |
| dkfzp686k16 | 0.418 | -2.391 | similar to BMP2 inducible kinase (DKFZp686K16132), mRNA.                                                                                                                                                |
| znf22       | 0.418 | -2.392 | zinc finger protein 22 (KOX 15) (ZNF22), mRNA.                                                                                                                                                          |
| gstk1       | 0.418 | -2.392 | glutathione S-transferase kappa 1 (GSTK1), mRNA.                                                                                                                                                        |
| lamc2       | 0.418 | -2.392 | laminin, gamma 2 (LAMC2), transcript variant 1, mRNA.                                                                                                                                                   |
| hs.440088   | 0.418 | -2.393 | BX393727 NEUROBLASTOMA COT 25-NORMALIZED Homo sapiens cDNA clone CS0DC001YP02 5-PRIME, mRNA sequence                                                                                                    |
| znf511      | 0.418 | -2.393 | zinc finger protein 511 (ZNF511), mRNA.                                                                                                                                                                 |
| c1rl        | 0.418 | -2.393 | complement component 1, r subcomponent-like (C1RL), mRNA.                                                                                                                                               |
| hs.193767   | 0.418 | -2.393 | cDNA FLJ26188 fis, clone ADG04821                                                                                                                                                                       |
| eif2s1      | 0.418 | -2.394 | eukaryotic translation initiation factor 2, subunit 1 alpha, 35kDa (EIF2S1), mRNA.                                                                                                                      |
| leprel1     | 0.418 | -2.394 | leprecan-like 1 (LEPREL1), mRNA.                                                                                                                                                                        |
| hcap-h2     | 0.418 | -2.394 | non-SMC condensin II complex, subunit H2 (NCAPH2), transcript variant 1, mRNA.                                                                                                                          |
| flj14466    | 0.418 | -2.394 | transmembrane protein 142A (TMEM142A), mRNA.                                                                                                                                                            |
| apeh        | 0.418 | -2.395 | N-acylaminoacyl-peptide hydrolase (APEH), mRNA.                                                                                                                                                         |
| hs.583806   | 0.418 | -2.395 | AGENCOURT_7908292 NIH_MGC_82 cDNA clone IMAGE:6102595 5, mRNA sequence                                                                                                                                  |
| ubp1        | 0.418 | -2.395 | upstream binding protein 1 (LBP-1a) (UBP1), mRNA.                                                                                                                                                       |
| plcd3       | 0.417 | -2.396 | phospholipase C, delta 3 (PLCD3), mRNA.                                                                                                                                                                 |
| nudcd3      | 0.417 | -2.396 | NudC domain containing 3 (NUDCD3), mRNA.                                                                                                                                                                |
| loc402694   | 0.417 | -2.396 | PREDICTED: similar to ribosomal protein L15 (LOC402694), mRNA.                                                                                                                                          |
| vhl         | 0.417 | -2.397 | von Hippel-Lindau tumor suppressor (VHL), transcript variant 1, mRNA.                                                                                                                                   |
| isca1       | 0.417 | -2.397 | iron-sulfur cluster assembly 1 homolog ( <i>S. cerevisiae</i> ) (ISCA1), mRNA.                                                                                                                          |
| loc388621   | 0.417 | -2.397 | PREDICTED: similar to ribosomal protein L21 isoform 1 (LOC388621), mRNA.                                                                                                                                |
| lzic        | 0.417 | -2.397 | leucine zipper and CTNNBIP1 domain containing (LZIC), mRNA.                                                                                                                                             |
| ap2s1       | 0.417 | -2.398 | adaptor-related protein complex 2, sigma 1 subunit (AP2S1), transcript variant AP17, mRNA.                                                                                                              |
| prkce       | 0.417 | -2.399 | protein kinase C, epsilon (PRKCE), mRNA.                                                                                                                                                                |
| rai17       | 0.417 | -2.4   | zinc finger, MIZ-type containing 1 (ZMIZ1), mRNA.                                                                                                                                                       |
| c5orf15     | 0.417 | -2.4   | chromosome 5 open reading frame 15 (C5orf15), mRNA.                                                                                                                                                     |
| ddx50       | 0.417 | -2.4   | DEAD (Asp-Glu-Ala-Asp) box polypeptide 50 (DDX50), mRNA.                                                                                                                                                |
| c6orf160    | 0.417 | -2.401 | PREDICTED: chromosome 6 open reading frame 160, transcript variant 4 (C6orf160), mRNA.                                                                                                                  |
| c8orf52     | 0.417 | -2.401 | integrator complex subunit 8 (INTS8), mRNA.                                                                                                                                                             |
| mrps27      | 0.416 | -2.401 | mitochondrial ribosomal protein S27 (MRPS27), nuclear gene encoding mitochondrial protein, mRNA.                                                                                                        |
| cnot8       | 0.416 | -2.401 | CCR4-NOT transcription complex, subunit 8 (CNOT8), mRNA.                                                                                                                                                |
| flj21749    | 0.416 | -2.402 | hypothetical protein FLJ21749 (FLJ21749), mRNA.                                                                                                                                                         |
| tbl1x       | 0.416 | -2.403 | transducin (beta)-like 1X-linked (TBL1X), mRNA.                                                                                                                                                         |

|           |       |                                                                                                                                         |
|-----------|-------|-----------------------------------------------------------------------------------------------------------------------------------------|
| c9orf74   | 0.416 | -2.403 ubiquitin related modifier 1 homolog ( <i>S. cerevisiae</i> ) (URM1), mRNA.                                                      |
| ubph      | 0.416 | -2.403 similar to ubiquitin binding protein (UBPH), mRNA.                                                                               |
| fahd2b    | 0.416 | -2.403 fumarylacetoacetate hydrolase domain containing 2B (FAHD2B), mRNA.                                                               |
| zcd1      | 0.416 | -2.403 zinc finger, CDGSH-type domain 1 (ZCD1), mRNA.                                                                                   |
| pgm2l1    | 0.416 | -2.403 phosphoglucomutase 2-like 1 (PGM2L1), mRNA.                                                                                      |
| trappc1   | 0.416 | -2.404 trafficking protein particle complex 1 (TRAPPC1), mRNA.                                                                          |
| top3a     | 0.416 | -2.404 topoisomerase (DNA) III alpha (TOP3A), mRNA.                                                                                     |
| fem1c     | 0.416 | -2.404 fem-1 homolog c ( <i>C.elegans</i> ) (FEM1C), mRNA.                                                                              |
| loc644969 | 0.416 | -2.405 PREDICTED: similar to Ubiquinol-cytochrome c reductase complex 14 kDa protein (Complex III subunit VI) (QP-C) (LOC644969), mRNA. |
| ktn1      | 0.416 | -2.405 kinectin 1 (kinesin receptor) (KTN1), mRNA.                                                                                      |
| thrap4    | 0.416 | -2.405 thyroid hormone receptor associated protein 4 (THRAP4), mRNA.                                                                    |
| plk2      | 0.416 | -2.405 polo-like kinase 2 ( <i>Drosophila</i> ) (PLK2), mRNA.                                                                           |
| csda      | 0.416 | -2.405 cold shock domain protein A (CSDA), mRNA.                                                                                        |
| atp6v1g1  | 0.416 | -2.405 ATPase, H <sup>+</sup> transporting, lysosomal 13kDa, V1 subunit G isoform 1 (ATP6V1G1), mRNA.                                   |
| smc4      | 0.416 | -2.406 structural maintenance of chromosomes 4 (SMC4), transcript variant 2, mRNA.                                                      |
| susd1     | 0.416 | -2.406 sushi domain containing 1 (SUSD1), mRNA.                                                                                         |
| dhrs4l2   | 0.416 | -2.406 dehydrogenase/reductase (SDR family) member 4 like 2 (DHRS4L2), mRNA.                                                            |
| tor3a     | 0.416 | -2.407 torsin family 3, member A (TOR3A), mRNA.                                                                                         |
| e2f2      | 0.415 | -2.407 E2F transcription factor 2 (E2F2), mRNA.                                                                                         |
| hs.513971 | 0.415 | -2.407 cDNA FLJ34018 fis, clone FCBBF2002801                                                                                            |
| abcf1     | 0.415 | -2.407 ATP-binding cassette, sub-family F (GCN20), member 1 (ABCF1), transcript variant 2, mRNA.                                        |
| slc39a14  | 0.415 | -2.407 solute carrier family 39 (zinc transporter), member 14 (SLC39A14), mRNA.                                                         |
| gss       | 0.415 | -2.408 glutathione synthetase (GSS), mRNA.                                                                                              |
| taf6l     | 0.415 | -2.408 TAF6-like RNA polymerase II, p300/CBP-associated factor (PCAF)-associated factor, 65kDa (TAF6L), mRNA.                           |
| loc286334 | 0.415 | -2.409 PREDICTED: hypothetical protein LOC286334 (LOC286334), mRNA.                                                                     |
| rnf20     | 0.415 | -2.409 ring finger protein 20 (RNF20), mRNA.                                                                                            |
| als2      | 0.415 | -2.409 amyotrophic lateral sclerosis 2 (juvenile) (ALS2), mRNA.                                                                         |
| loc653171 | 0.415 | -2.409 PREDICTED: similar to MAPK-interacting and spindle-stabilizing protein (LOC653171), mRNA.                                        |
| gtf3c5    | 0.415 | -2.41 general transcription factor IIIC, polypeptide 5, 63kDa (GTF3C5), mRNA.                                                           |
| c9orf156  | 0.415 | -2.41 chromosome 9 open reading frame 156 (C9orf156), mRNA.                                                                             |
| nsmce1    | 0.415 | -2.41 non-SMC element 1 homolog ( <i>S. cerevisiae</i> ) (NSMCE1), mRNA.                                                                |
| pcnxl3    | 0.415 | -2.41 PREDICTED: pecanex-like 3 ( <i>Drosophila</i> ), transcript variant 4 (PCNXL3), mRNA.                                             |
| htra2     | 0.415 | -2.411 HtrA serine peptidase 2 (HTRA2), nuclear gene encoding mitochondrial protein, transcript variant 2, mRNA.                        |
| pdk4      | 0.415 | -2.411 pyruvate dehydrogenase kinase, isozyme 4 (PDK4), mRNA.                                                                           |
| ncbp1     | 0.415 | -2.411 nuclear cap binding protein subunit 1, 80kDa (NCBP1), mRNA.                                                                      |
| nosip     | 0.415 | -2.411 nitric oxide synthase interacting protein (NOSIP), mRNA.                                                                         |
| unc45a    | 0.415 | -2.412 unc-45 homolog A ( <i>C. elegans</i> ) (UNC45A), transcript variant 3, mRNA.                                                     |
| srgap1    | 0.415 | -2.412 SLIT-ROBO Rho GTPase activating protein 1 (SRGAP1), mRNA.                                                                        |
| rragb     | 0.415 | -2.412 Ras-related GTP binding B (RRAGB), transcript variant RAGBs, mRNA.                                                               |
| wbp4      | 0.415 | -2.412 WW domain binding protein 4 (formin binding protein 21) (WBP4), mRNA.                                                            |
| api5      | 0.415 | -2.412 apoptosis inhibitor 5 (API5), mRNA.                                                                                              |

|           |       |        |                                                                                                          |
|-----------|-------|--------|----------------------------------------------------------------------------------------------------------|
| rbaf600   | 0.414 | -2.413 | retinoblastoma-associated factor 600 (RBAF600), mRNA.                                                    |
| phyh      | 0.414 | -2.413 | phytanoyl-CoA hydroxylase (Refsum disease) (PHYH), mRNA.                                                 |
| kiaa2013  | 0.414 | -2.414 | KIAA2013 (KIAA2013), mRNA.                                                                               |
| acot9     | 0.414 | -2.414 | acyl-CoA thioesterase 9 (ACOT9), mRNA.                                                                   |
| flj34969  | 0.414 | -2.415 | PREDICTED: hypothetical protein FLJ34969 (FLJ34969), mRNA.                                               |
| spen      | 0.414 | -2.415 | spen homolog, transcriptional regulator (Drosophila) (SPEN), mRNA.                                       |
| mrpl17    | 0.414 | -2.415 | mitochondrial ribosomal protein L17 (MRPL17), nuclear gene encoding mitochondrial protein, mRNA.         |
| cdk5rap1  | 0.414 | -2.416 | CDK5 regulatory subunit associated protein 1 (CDK5RAP1), transcript variant 1, mRNA.                     |
| baat      | 0.414 | -2.416 | bile acid Coenzyme A: amino acid N-acyltransferase (glycine N-choloyltransferase) (BAAT), mRNA.          |
| c20orf14  | 0.414 | -2.417 | chromosome 20 open reading frame 14 (C20orf14), mRNA.                                                    |
| bfsp1     | 0.414 | -2.418 | beaded filament structural protein 1, filensin (BFSP1), mRNA.                                            |
| atp6ap1   | 0.414 | -2.418 | ATPase, H <sup>+</sup> transporting, lysosomal accessory protein 1 (ATP6AP1), mRNA.                      |
| vcl       | 0.414 | -2.418 | vinculin (VCL), transcript variant 1, mRNA.                                                              |
| abcc2     | 0.414 | -2.418 | ATP-binding cassette, sub-family C (CFTR/MRP), member 2 (ABCC2), mRNA.                                   |
| loc652500 | 0.413 | -2.419 | PREDICTED: similar to butyrate-induced transcript 1 (LOC652500), mRNA.                                   |
| znf266    | 0.413 | -2.419 | zinc finger protein 266 (ZNF266), mRNA.                                                                  |
| dyrk1a    | 0.413 | -2.419 | dual-specificity tyrosine-(Y)-phosphorylation regulated kinase 1A (DYRK1A), transcript variant 2, mRNA.  |
| rab11fip2 | 0.413 | -2.419 | RAB11 family interacting protein 2 (class I) (RAB11FIP2), mRNA.                                          |
| mt2a      | 0.413 | -2.419 | metallothionein 2A (MT2A), mRNA.                                                                         |
| mrpl41    | 0.413 | -2.419 | mitochondrial ribosomal protein L41 (MRPL41), nuclear gene encoding mitochondrial protein, mRNA.         |
| pigg      | 0.413 | -2.42  | phosphatidylinositol glycan anchor biosynthesis, class G (PIGG), mRNA.                                   |
| eif4b     | 0.413 | -2.42  | eukaryotic translation initiation factor 4B (EIF4B), mRNA.                                               |
| c18orf37  | 0.413 | -2.42  | chromosome 18 open reading frame 37 (C18orf37), mRNA.                                                    |
| galntl4   | 0.413 | -2.42  | UDP-N-acetyl-alpha-D-galactosamine:polypeptide N-acetylgalactosaminyltransferase-like 4 (GALNTL4), mRNA. |
| cri2      | 0.413 | -2.42  | EP300 interacting inhibitor of differentiation 2 (EID2), mRNA.                                           |
| flj10213  | 0.413 | -2.421 | hypothetical protein FLJ10213 (FLJ10213), mRNA.                                                          |
| thbd      | 0.413 | -2.421 | thrombomodulin (THBD), mRNA.                                                                             |
| c11orf48  | 0.413 | -2.422 | chromosome 11 open reading frame 48 (C11orf48), mRNA.                                                    |
| hexa      | 0.413 | -2.422 | hexosaminidase A (alpha polypeptide) (HEXA), mRNA.                                                       |
| tmem16f   | 0.413 | -2.423 | transmembrane protein 16F (TMEM16F), mRNA.                                                               |
| loc221143 | 0.413 | -2.423 | N-6 adenine-specific DNA methyltransferase 2 (putative) (N6AMT2), mRNA.                                  |
| nagpa     | 0.413 | -2.423 | N-acetylglucosamine-1-phosphodiester alpha-N-acetylglucosaminidase (NAGPA), mRNA.                        |
| hnrpa1l-2 | 0.413 | -2.424 | heterogeneous nuclear ribonucleoprotein A1 pseudogene (HNRPA1L-2) on chromosome 19.                      |
| igbp1     | 0.413 | -2.424 | immunoglobulin (CD79A) binding protein 1 (IGBP1), mRNA.                                                  |
| fcgrt     | 0.413 | -2.424 | Fc fragment of IgG, receptor, transporter, alpha (FCGRT), mRNA.                                          |
| cib2      | 0.413 | -2.424 | calcium and integrin binding family member 2 (CIB2), mRNA.                                               |
| mrps23    | 0.412 | -2.425 | mitochondrial ribosomal protein S23 (MRPS23), nuclear gene encoding mitochondrial protein, mRNA.         |
| fhod1     | 0.412 | -2.425 | formin homology 2 domain containing 1 (FHOD1), mRNA.                                                     |
| serpina3  | 0.412 | -2.426 | serpin peptidase inhibitor, clade A (alpha-1 antiprotease, antitrypsin), member 3 (SERPINA3), mRNA.      |
| dpp7      | 0.412 | -2.426 | dipeptidyl-peptidase 7 (DPP7), mRNA.                                                                     |
| sp1       | 0.412 | -2.426 | Sp1 transcription factor (SP1), mRNA.                                                                    |
| acox1     | 0.412 | -2.426 | acyl-Coenzyme A oxidase 1, palmitoyl (ACOX1), transcript variant 1, mRNA.                                |

|           |       |                                                                                                                                                   |
|-----------|-------|---------------------------------------------------------------------------------------------------------------------------------------------------|
| c20orf121 | 0.412 | -2.427 chromosome 20 open reading frame 121 (C20orf121), mRNA.                                                                                    |
| rhbdd2    | 0.412 | -2.427 rhomboid domain containing 2 (RHBDD2), mRNA.                                                                                               |
| nol11     | 0.412 | -2.428 nucleolar protein 11 (NOL11), mRNA.                                                                                                        |
| c5        | 0.412 | -2.428 complement component 5 (C5), mRNA.                                                                                                         |
| mrps2     | 0.412 | -2.429 mitochondrial ribosomal protein S2 (MRPS2), nuclear gene encoding mitochondrial protein, mRNA.                                             |
| plce1     | 0.412 | -2.429 phospholipase C, epsilon 1 (PLCE1), mRNA.                                                                                                  |
| c15orf39  | 0.412 | -2.429 chromosome 15 open reading frame 39 (C15orf39), mRNA.                                                                                      |
| scn1b     | 0.412 | -2.43 sodium channel, voltage-gated, type I, beta (SCN1B), transcript variant b, mRNA.                                                            |
| rpl13     | 0.411 | -2.43 ribosomal protein L13 (RPL13), transcript variant 2, mRNA.                                                                                  |
| c8orf35   | 0.411 | -2.431 chromosome 8 open reading frame 35 (C8orf35), mRNA.                                                                                        |
| loc643031 | 0.411 | -2.432 PREDICTED: similar to NADH dehydrogenase subunit 5 (LOC643031), mRNA.                                                                      |
| ergic3    | 0.411 | -2.433 ERGIC and golgi 3 (ERGIC3), transcript variant 1, mRNA.                                                                                    |
| ny-sar-48 | 0.411 | -2.433 sarcoma antigen NY-SAR-48 (NY-SAR-48), transcript variant 2, mRNA.                                                                         |
| mrpl48    | 0.411 | -2.433 mitochondrial ribosomal protein L48 (MRPL48), nuclear gene encoding mitochondrial protein, mRNA.                                           |
| ccdc14    | 0.411 | -2.434 coiled-coil domain containing 14 (CCDC14), mRNA.                                                                                           |
| stat2     | 0.411 | -2.434 signal transducer and activator of transcription 2, 113kDa (STAT2), mRNA.                                                                  |
| mrpl40    | 0.411 | -2.434 mitochondrial ribosomal protein L40 (MRPL40), nuclear gene encoding mitochondrial protein, mRNA.                                           |
| mtrf1l    | 0.411 | -2.434 mitochondrial translational release factor 1-like (MTRF1L), mRNA.                                                                          |
| znf529    | 0.411 | -2.434 zinc finger protein 529 (ZNF529), mRNA.                                                                                                    |
| wrb       | 0.411 | -2.434 tryptophan rich basic protein (WRB), mRNA.                                                                                                 |
| atp5l     | 0.411 | -2.435 ATP synthase, H <sup>+</sup> transporting, mitochondrial F0 complex, subunit G (ATP5L), nuclear gene encoding mitochondrial protein, mRNA. |
| flot1     | 0.411 | -2.436 flotillin 1 (FLOT1), mRNA.                                                                                                                 |
| gpc1      | 0.41  | -2.437 glypican 1 (GPC1), mRNA.                                                                                                                   |
| peg10     | 0.41  | -2.437 paternally expressed 10 (PEG10), transcript variant 1, mRNA. XM_940378                                                                     |
| hs.508682 | 0.41  | -2.437 AV762101 MDS cDNA clone MDSEOA03 5, mRNA sequence                                                                                          |
| psmd6     | 0.41  | -2.438 proteasome (prosome, macropain) 26S subunit, non-ATPase, 6 (PSMD6), mRNA.                                                                  |
| ppm1h     | 0.41  | -2.438 PREDICTED: protein phosphatase 1H (PP2C domain containing) (PPM1H), mRNA.                                                                  |
| hs.57079  | 0.41  | -2.438 cDNA FLJ13267 fis, clone OVARC1000964                                                                                                      |
| btbd10    | 0.41  | -2.438 BTB (POZ) domain containing 10 (BTBD10), mRNA.                                                                                             |
| vim       | 0.41  | -2.439 vimentin (VIM), mRNA.                                                                                                                      |
| rassf2    | 0.41  | -2.439 Ras association (RalGDS/AF-6) domain family 2 (RASSF2), transcript variant 2, mRNA.                                                        |
| abhd4     | 0.41  | -2.439 abhydrolase domain containing 4 (ABHD4), mRNA.                                                                                             |
| nxfl      | 0.41  | -2.44 nuclear RNA export factor 1 (NXF1), mRNA.                                                                                                   |
| loc644191 | 0.41  | -2.44 PREDICTED: similar to 40S ribosomal protein S26, transcript variant 2 (LOC644191), mRNA.                                                    |
| p2ry11    | 0.41  | -2.44 purinergic receptor P2Y, G-protein coupled, 11 (P2RY11), mRNA.                                                                              |
| purb      | 0.41  | -2.441 purine-rich element binding protein B (PURB), mRNA.                                                                                        |
| hspc152   | 0.41  | -2.441 hypothetical protein HSPC152 (HSPC152), mRNA.                                                                                              |
| tmem4     | 0.41  | -2.441 transmembrane protein 4 (TMEM4), mRNA.                                                                                                     |
| c1orf166  | 0.41  | -2.441 chromosome 1 open reading frame 166 (C1orf166), mRNA.                                                                                      |
| ring1     | 0.41  | -2.441 ring finger protein 1 (RING1), mRNA.                                                                                                       |
| akap8l    | 0.409 | -2.442 A kinase (PRKA) anchor protein 8-like (AKAP8L), mRNA.                                                                                      |

|           |       |                                                                                                        |
|-----------|-------|--------------------------------------------------------------------------------------------------------|
| fancg     | 0.409 | -2.442 Fanconi anemia, complementation group G (FANCG), mRNA.                                          |
| cdk5rap3  | 0.409 | -2.442 CDK5 regulatory subunit associated protein 3 (CDK5RAP3), mRNA.                                  |
| pttg3     | 0.409 | -2.443 pituitary tumor-transforming 3 (PTTG3) on chromosome 8.                                         |
| taf10     | 0.409 | -2.443 TAF10 RNA polymerase II, TATA box binding protein (TBP)-associated factor, 30kDa (TAF10), mRNA. |
| ube3c     | 0.409 | -2.444 ubiquitin protein ligase E3C (UBE3C), mRNA.                                                     |
| ddx10     | 0.409 | -2.444 DEAD (Asp-Glu-Ala-Asp) box polypeptide 10 (DDX10), mRNA.                                        |
| pbef1     | 0.409 | -2.444 pre-B-cell colony enhancing factor 1 (PBEF1), transcript variant 2, mRNA.                       |
| stk38     | 0.409 | -2.444 serine/threonine kinase 38 (STK38), mRNA.                                                       |
| hnrpdl    | 0.409 | -2.445 heterogeneous nuclear ribonucleoprotein D-like (HNRPDL), transcript variant 1, mRNA.            |
| mical2    | 0.409 | -2.445 microtubule associated monooxygenase, calponin and LIM domain containing 2 (MICAL2), mRNA.      |
| cyb5a     | 0.409 | -2.445 cytochrome b5 type A (microsomal) (CYB5A), transcript variant 2, mRNA.                          |
| wdr79     | 0.409 | -2.445 WD repeat domain 79 (WDR79), mRNA.                                                              |
| loc652672 | 0.409 | -2.445 PREDICTED: similar to damage-specific DNA binding protein 1 (LOC652672), mRNA.                  |
| tspan17   | 0.409 | -2.446 tetraspanin 17 (TSPAN17), transcript variant 1, mRNA.                                           |
| fgfr4     | 0.409 | -2.446 fibroblast growth factor receptor 4 (FGFR4), transcript variant 2, mRNA.                        |
| sld5      | 0.409 | -2.446 GINS complex subunit 4 (Sld5 homolog) (GINS4), mRNA.                                            |
| c1orf122  | 0.409 | -2.446 chromosome 1 open reading frame 122 (C1orf122), mRNA.                                           |
| actr10    | 0.409 | -2.446 actin-related protein 10 homolog (S. cerevisiae) (ACTR10), mRNA.                                |
| tspan5    | 0.409 | -2.446 tetraspanin 5 (TSPAN5), mRNA.                                                                   |
| ptplad2   | 0.409 | -2.447 protein tyrosine phosphatase-like A domain containing 2 (PTPLAD2), mRNA.                        |
| manba     | 0.409 | -2.447 mannosidase, beta A, lysosomal (MANBA), mRNA.                                                   |
| nfe2l1    | 0.408 | -2.448 nuclear factor (erythroid-derived 2)-like 1 (NFE2L1), mRNA.                                     |
| col16a1   | 0.408 | -2.448 collagen, type XVI, alpha 1 (COL16A1), mRNA.                                                    |
| irf3      | 0.408 | -2.448 interferon regulatory factor 3 (IRF3), mRNA.                                                    |
| kiaa1423  | 0.408 | -2.449 PREDICTED: KIAA1423 (KIAA1423), mRNA.                                                           |
| mgc16169  | 0.408 | -2.449 hypothetical protein MGC16169 (MGC16169), mRNA.                                                 |
| pabpc1    | 0.408 | -2.449 poly(A) binding protein, cytoplasmic 1 (PABPC1), mRNA.                                          |
| c21orf57  | 0.408 | -2.45 chromosome 21 open reading frame 57 (C21orf57), transcript variant 2, mRNA.                      |
| nme3      | 0.408 | -2.45 non-metastatic cells 3, protein expressed in (NME3), mRNA.                                       |
| vdp       | 0.408 | -2.45 vesicle docking protein p115 (VDP), mRNA.                                                        |
| eif3s4    | 0.408 | -2.451 eukaryotic translation initiation factor 3, subunit 4 delta, 44kDa (EIF3S4), mRNA.              |
| snft      | 0.408 | -2.451 Jun dimerization protein p21SNFT (SNFT), mRNA.                                                  |
| c3orf9    | 0.408 | -2.451 KTEL (Lys-Tyr-Glu-Leu) containing 1 (KTELC1), mRNA.                                             |
| nme1-nme2 | 0.408 | -2.451 NM23-LV (NME1-NME2), mRNA.                                                                      |
| sh2d4a    | 0.408 | -2.452 SH2 domain containing 4A (SH2D4A), mRNA.                                                        |
| gle1l     | 0.408 | -2.452 GLE1 RNA export mediator-like (yeast) (GLE1L), transcript variant 2, mRNA.                      |
| loc440348 | 0.408 | -2.453 similar to nuclear pore complex interacting protein (LOC440348), mRNA.                          |
| flj25222  | 0.408 | -2.453 CXYorf1-related protein (FLJ25222), mRNA.                                                       |
| tgfbra1   | 0.408 | -2.454 transforming growth factor, beta receptor associated protein 1 (TGFBRA1), mRNA.                 |
| nufip2    | 0.407 | -2.454 nuclear fragile X mental retardation protein interacting protein 2 (NUFIP2), mRNA.              |
| tarbp2    | 0.407 | -2.454 TAR (HIV-1) RNA binding protein 2 (TARBP2), transcript variant 1, mRNA.                         |
| tnnt1     | 0.407 | -2.455 troponin T type 1 (skeletal, slow) (TNNT1), mRNA.                                               |

|           |       |                                                                                                                   |
|-----------|-------|-------------------------------------------------------------------------------------------------------------------|
| tspyl5    | 0.407 | -2.455 TSPY-like 5 (TSPYL5), mRNA.                                                                                |
| bcl2l1    | 0.407 | -2.455 BCL2-like 1 (BCL2L1), nuclear gene encoding mitochondrial protein, transcript variant 1, mRNA.             |
| cda       | 0.407 | -2.456 cytidine deaminase (CDA), mRNA.                                                                            |
| cant1     | 0.407 | -2.456 calcium activated nucleotidase 1 (CANT1), mRNA.                                                            |
| flj20186  | 0.407 | -2.456 hypothetical protein FLJ20186 (FLJ20186), transcript variant 1, mRNA.                                      |
| c7orf24   | 0.407 | -2.456 chromosome 7 open reading frame 24 (C7orf24), mRNA.                                                        |
| tm2d1     | 0.407 | -2.456 TM2 domain containing 1 (TM2D1), mRNA.                                                                     |
| plekhh2   | 0.407 | -2.456 pleckstrin homology domain containing, family B (evectins) member 2 (PLEKHB2), transcript variant 2, mRNA. |
| akap8     | 0.407 | -2.457 A kinase (PRKA) anchor protein 8 (AKAP8), mRNA.                                                            |
| pus7      | 0.407 | -2.457 pseudouridylylase synthase 7 homolog (S. cerevisiae) (PUS7), mRNA.                                         |
| prps2     | 0.407 | -2.457 phosphoribosyl pyrophosphate synthetase 2 (PRPS2), transcript variant 1, mRNA.                             |
| surf4     | 0.407 | -2.458 surf4 (SURF4), mRNA.                                                                                       |
| ehd2      | 0.407 | -2.459 EH-domain containing 2 (EHD2), mRNA.                                                                       |
| clip1     | 0.407 | -2.459 CAP-GLY domain containing linker protein 1 (CLIP1), transcript variant 1, mRNA.                            |
| pdc5      | 0.407 | -2.46 programmed cell death 5 (PDCD5), mRNA.                                                                      |
| atp6v0a1  | 0.406 | -2.461 ATPase, H <sup>+</sup> transporting, lysosomal V0 subunit a isoform 1 (ATP6VOA1), mRNA.                    |
| hdcma18p  | 0.406 | -2.462 HDCMA18P protein (HDCMA18P), mRNA.                                                                         |
| cxcl5     | 0.406 | -2.462 chemokine (C-X-C motif) ligand 5 (CXCL5), mRNA.                                                            |
| gemin6    | 0.406 | -2.462 gem (nuclear organelle) associated protein 6 (GEMIN6), mRNA.                                               |
| rnd1      | 0.406 | -2.463 Rho family GTPase 1 (RND1), mRNA.                                                                          |
| ndufab1   | 0.406 | -2.464 NADH dehydrogenase (ubiquinone) 1, alpha/beta subcomplex, 1, 8kDa (NDUFAB1), mRNA.                         |
| p2rx4     | 0.406 | -2.464 purinergic receptor P2X, ligand-gated ion channel, 4 (P2RX4), transcript variant 3, mRNA.                  |
| znhit1    | 0.406 | -2.465 zinc finger, HIT type 1 (ZNHIT1), mRNA.                                                                    |
| ssr4      | 0.406 | -2.465 signal sequence receptor, delta (translocon-associated protein delta) (SSR4), mRNA.                        |
| samd1     | 0.406 | -2.465 sterile alpha motif domain containing 1 (SAMD1), mRNA.                                                     |
| setx      | 0.406 | -2.465 senataxin (SETX), mRNA.                                                                                    |
| smox      | 0.406 | -2.466 spermine oxidase (SMOX), transcript variant 4, mRNA.                                                       |
| ptpla     | 0.405 | -2.466 protein tyrosine phosphatase-like (proline instead of catalytic arginine), member a (PTPLA), mRNA.         |
| lppr2     | 0.405 | -2.467 lipid phosphate phosphatase-related protein type 2 (LPPR2), mRNA.                                          |
| anapc13   | 0.405 | -2.467 anaphase promoting complex subunit 13 (ANAPC13), mRNA.                                                     |
| fam45a    | 0.405 | -2.467 family with sequence similarity 45, member A (FAM45A), mRNA.                                               |
| ccdc43    | 0.405 | -2.467 coiled-coil domain containing 43 (CCDC43), mRNA.                                                           |
| copg      | 0.405 | -2.467 coatomer protein complex, subunit gamma (COPG), mRNA.                                                      |
| ssna1     | 0.405 | -2.467 Sjogren's syndrome nuclear autoantigen 1 (SSNA1), mRNA.                                                    |
| hs.184721 | 0.405 | -2.467 EST366269 MAGE resequences, MAGC cDNA, mRNA sequence                                                       |
| acp2      | 0.405 | -2.468 acid phosphatase 2, lysosomal (ACP2), mRNA.                                                                |
| ddx56     | 0.405 | -2.468 DEAD (Asp-Glu-Ala-Asp) box polypeptide 56 (DDX56), mRNA.                                                   |
| loc147808 | 0.405 | -2.468 zinc finger protein 784 (ZNF784), mRNA.                                                                    |
| c14orf28  | 0.405 | -2.469 chromosome 14 open reading frame 28 (C14orf28), mRNA.                                                      |
| suclg2    | 0.405 | -2.469 succinate-CoA ligase, GDP-forming, beta subunit (SUCLG2), mRNA.                                            |
| aamp      | 0.405 | -2.469 angio-associated, migratory cell protein (AAMP), mRNA.                                                     |
| sh3pxd2b  | 0.405 | -2.469 SH3 and PX domains 2B (SH3PXD2B), mRNA.                                                                    |

|           |       |                                                                                                                                                                                  |
|-----------|-------|----------------------------------------------------------------------------------------------------------------------------------------------------------------------------------|
| zbed1     | 0.405 | -2.469 zinc finger, BED-type containing 1 (ZBED1), mRNA.                                                                                                                         |
| ewsr1     | 0.405 | -2.47 Ewing sarcoma breakpoint region 1 (EWSR1), transcript variant EWS, mRNA.                                                                                                   |
| cdk7      | 0.405 | -2.47 cyclin-dependent kinase 7 (MO15 homolog, <i>Xenopus laevis</i> , cdk-activating kinase) (CDK7), mRNA.                                                                      |
| sf4       | 0.405 | -2.47 splicing factor 4 (SF4), transcript variant c, mRNA.                                                                                                                       |
| atpif1    | 0.405 | -2.471 ATPase inhibitory factor 1 (ATPIF1), nuclear gene encoding mitochondrial protein, transcript variant 3, mRNA.                                                             |
| ap1s1     | 0.405 | -2.471 adaptor-related protein complex 1, sigma 1 subunit (AP1S1), transcript variant 1, mRNA.                                                                                   |
| scarb1    | 0.405 | -2.472 scavenger receptor class B, member 1 (SCARB1), mRNA.                                                                                                                      |
| zdhhc24   | 0.404 | -2.472 zinc finger, DHHC-type containing 24 (ZDHHC24), mRNA.                                                                                                                     |
| klp1      | 0.404 | -2.472 N-acetyltransferase 14 (NAT14), mRNA.                                                                                                                                     |
| cst3      | 0.404 | -2.473 cystatin C (amyloid angiopathy and cerebral hemorrhage) (CST3), mRNA.                                                                                                     |
| wdr13     | 0.404 | -2.473 WD repeat domain 13 (WDR13), mRNA.                                                                                                                                        |
| slc29a3   | 0.404 | -2.474 solute carrier family 29 (nucleoside transporters), member 3 (SLC29A3), mRNA.                                                                                             |
| tmem54    | 0.404 | -2.474 transmembrane protein 54 (TMEM54), mRNA.                                                                                                                                  |
| loc643949 | 0.404 | -2.474 PREDICTED: similar to 60S acidic ribosomal protein P2 (LOC643949), mRNA.                                                                                                  |
| loc134147 | 0.404 | -2.474 similar to mouse 2310016A09Rik gene (LOC134147), mRNA.                                                                                                                    |
| tmed9     | 0.404 | -2.474 transmembrane emp24 protein transport domain containing 9 (TMED9), mRNA.                                                                                                  |
| psap      | 0.404 | -2.474 prosaposin (variant Gaucher disease and variant metachromatic leukodystrophy) (PSAP), mRNA.                                                                               |
| flj10081  | 0.404 | -2.476 hypothetical protein FLJ10081 (FLJ10081), mRNA.                                                                                                                           |
| rbm6      | 0.404 | -2.476 RNA binding motif protein 6 (RBM6), mRNA.                                                                                                                                 |
| ipo9      | 0.404 | -2.476 importin 9 (IPO9), mRNA.                                                                                                                                                  |
| znf532    | 0.404 | -2.477 zinc finger protein 532 (ZNF532), mRNA.                                                                                                                                   |
| ica1      | 0.404 | -2.477 islet cell autoantigen 1, 69kDa (ICA1), transcript variant 2, mRNA.                                                                                                       |
| zbtb4     | 0.404 | -2.478 zinc finger and BTB domain containing 4 (ZBTB4), mRNA.                                                                                                                    |
| hs.121525 | 0.403 | -2.479 BX101252 NCI_CGAP_Lu24 cDNA clone IMAGp998I115625, mRNA sequence                                                                                                          |
| nxn       | 0.403 | -2.479 nucleoredoxin (NXN), mRNA.                                                                                                                                                |
| odc1      | 0.403 | -2.479 ornithine decarboxylase 1 (ODC1), mRNA.                                                                                                                                   |
| mfap1     | 0.403 | -2.479 microfibrillar-associated protein 1 (MFAP1), mRNA.                                                                                                                        |
| znf223    | 0.403 | -2.48 zinc finger protein 223 (ZNF223), mRNA.                                                                                                                                    |
| mcm5      | 0.403 | -2.48 MCM5 minichromosome maintenance deficient 5, cell division cycle 46 ( <i>S. cerevisiae</i> ) (MCM5), mRNA.                                                                 |
| ntan1     | 0.403 | -2.481 PREDICTED: N-terminal asparagine amidase, transcript variant 3 (NTAN1), mRNA.                                                                                             |
| pcoln3    | 0.403 | -2.481 procollagen (type III) N-endopeptidase (PCOLN3), mRNA.                                                                                                                    |
| map3k11   | 0.403 | -2.481 mitogen-activated protein kinase kinase kinase 11 (MAP3K11), mRNA.                                                                                                        |
| mc1r      | 0.403 | -2.481 melanocortin 1 receptor (alpha melanocyte stimulating hormone receptor) (MC1R), mRNA.                                                                                     |
| hs.461819 | 0.403 | -2.482 cDNA FLJ41112 fis, clone BRACE1000239                                                                                                                                     |
| herc5     | 0.403 | -2.482 hect domain and RLD 5 (HERC5), mRNA.                                                                                                                                      |
| adck1     | 0.403 | -2.483 aarF domain containing kinase 1 (ADCK1), mRNA.                                                                                                                            |
| rbm10     | 0.403 | -2.483 RNA binding motif protein 10 (RBM10), transcript variant 1, mRNA.                                                                                                         |
| mrpl1     | 0.403 | -2.483 mitochondrial ribosomal protein L1 (MRPL1), nuclear gene encoding mitochondrial protein, mRNA.                                                                            |
| ercc5     | 0.403 | -2.484 excision repair cross-complementing rodent repair deficiency, complementation group 5 (xeroderma pigmentosum, complementation group G (Cockayne syndrome)) (ERCC5), mRNA. |
| sumo2     | 0.403 | -2.484 SMT3 suppressor of mif two 3 homolog 2 ( <i>S. cerevisiae</i> ) (SUMO2), transcript variant 2, mRNA.                                                                      |
| 15-Sep    | 0.403 | -2.484 15 kDa selenoprotein (SEP15), transcript variant 1, mRNA.                                                                                                                 |



|           |       |        |                                                                                                                                    |
|-----------|-------|--------|------------------------------------------------------------------------------------------------------------------------------------|
| za20d2    | 0.402 | -2.485 | zinc finger, AN1-type domain 5 (ZFAND5), mRNA.                                                                                     |
| pigk      | 0.402 | -2.485 | phosphatidylinositol glycan, class K (PIGK), mRNA.                                                                                 |
| parp12    | 0.402 | -2.486 | poly (ADP-ribose) polymerase family, member 12 (PARP12), mRNA.                                                                     |
| loc440731 | 0.402 | -2.486 | PREDICTED: hypothetical LOC440731, transcript variant 2 (LOC440731), mRNA.                                                         |
| kiaa0427  | 0.402 | -2.486 | KIAA0427 (KIAA0427), mRNA.                                                                                                         |
| drg2      | 0.402 | -2.486 | developmentally regulated GTP binding protein 2 (DRG2), mRNA.                                                                      |
| cuedc1    | 0.402 | -2.487 | CUE domain containing 1 (CUEDC1), mRNA.                                                                                            |
| ephx2     | 0.402 | -2.488 | epoxide hydrolase 2, cytoplasmic (EPHX2), mRNA.                                                                                    |
| c12orf31  | 0.402 | -2.488 | chromosome 12 open reading frame 31 (C12orf31), mRNA.                                                                              |
| fbn2      | 0.402 | -2.489 | fibrillin 2 (congenital contractural arachnodactyly) (FBN2), mRNA.                                                                 |
| fkbp9l    | 0.402 | -2.489 | FK506 binding protein 9-like (FKBP9L), mRNA.                                                                                       |
| ctdsp1    | 0.402 | -2.489 | CTD (carboxy-terminal domain, RNA polymerase II, polypeptide A) small phosphatase 1 (CTDSP1), transcript variant 2, mRNA.          |
| ly6e      | 0.402 | -2.489 | lymphocyte antigen 6 complex, locus E (LY6E), mRNA.                                                                                |
| ndufv2    | 0.402 | -2.49  | NADH dehydrogenase (ubiquinone) flavoprotein 2, 24kDa (NDUFV2), mRNA.                                                              |
| hmf0839   | 0.402 | -2.49  | lung cancer metastasis-associated protein (MAG1), mRNA.                                                                            |
| cdc26     | 0.401 | -2.491 | cell division cycle 26 homolog ( <i>S. cerevisiae</i> ) (CDC26), mRNA.                                                             |
| tcf3      | 0.401 | -2.493 | transcription factor 3 (E2A immunoglobulin enhancer binding factors E12/E47) (TCF3), mRNA.                                         |
| ublcp1    | 0.401 | -2.493 | ubiquitin-like domain containing CTD phosphatase 1 (UBLCP1), mRNA.                                                                 |
| aarsl     | 0.401 | -2.493 | alanyl-tRNA synthetase like (AARSL), mRNA.                                                                                         |
| exo1      | 0.401 | -2.493 | exonuclease 1 (EXO1), transcript variant 2, mRNA.                                                                                  |
| ctnnbl1   | 0.401 | -2.493 | catenin, beta like 1 (CTNNBL1), mRNA.                                                                                              |
| spp1      | 0.401 | -2.493 | secreted phosphoprotein 1 (osteopontin, bone sialoprotein I, early T-lymphocyte activation 1) (SPP1), transcript variant 1, mRNA.  |
| rg9mtd1   | 0.401 | -2.494 | PREDICTED: RNA (guanine-9-) methyltransferase domain containing 1 (Rg9mtd1), mRNA.                                                 |
| lhfp12    | 0.401 | -2.494 | lipoma HMGIC fusion partner-like 2 (LHFPL2), mRNA.                                                                                 |
| man2b1    | 0.401 | -2.496 | mannosidase, alpha, class 2B, member 1 (MAN2B1), mRNA.                                                                             |
| atad3a    | 0.401 | -2.496 | ATPase family, AAA domain containing 3A (ATAD3A), mRNA.                                                                            |
| pdha1     | 0.401 | -2.497 | pyruvate dehydrogenase (lipoamide) alpha 1 (PDHA1), mRNA.                                                                          |
| alkbh6    | 0.4   | -2.497 | alkB, alkylation repair homolog 6 ( <i>E. coli</i> ) (ALKBH6), transcript variant 1, mRNA.                                         |
| cnm1      | 0.4   | -2.498 | cyclin M1 (CNNM1), mRNA.                                                                                                           |
| nr0b1     | 0.4   | -2.499 | nuclear receptor subfamily 0, group B, member 1 (NR0B1), mRNA.                                                                     |
| grwd1     | 0.4   | -2.499 | glutamate-rich WD repeat containing 1 (GRWD1), mRNA.                                                                               |
| mcm3      | 0.4   | -2.499 | MCM3 minichromosome maintenance deficient 3 ( <i>S. cerevisiae</i> ) (MCM3), mRNA.                                                 |
| fez2      | 0.4   | -2.5   | fasciculation and elongation protein zeta 2 (zygin II) (FEZ2), mRNA.                                                               |
| grina     | 0.4   | -2.5   | glutamate receptor, ionotropic, N-methyl D-aspartate-associated protein 1 (glutamate binding) (GRINA), transcript variant 2, mRNA. |
| slc35c1   | 0.4   | -2.5   | solute carrier family 35, member C1 (SLC35C1), mRNA.                                                                               |
| prpf19    | 0.4   | -2.5   | PRP19/PSO4 pre-mRNA processing factor 19 homolog ( <i>S. cerevisiae</i> ) (PRPF19), mRNA.                                          |
| dok4      | 0.4   | -2.501 | docking protein 4 (DOK4), mRNA.                                                                                                    |
| pttg2     | 0.4   | -2.502 | pituitary tumor-transforming 2 (PTTG2), mRNA.                                                                                      |
| pcbp1     | 0.4   | -2.502 | poly(rC) binding protein 1 (PCBP1), mRNA.                                                                                          |

|           |       |        |                                                                                                                                          |
|-----------|-------|--------|------------------------------------------------------------------------------------------------------------------------------------------|
| c20orf4   | 0.4   | -2.502 | chromosome 20 open reading frame 4 (C20orf4), mRNA.                                                                                      |
| arpc1a    | 0.4   | -2.503 | actin related protein 2/3 complex, subunit 1A, 41kDa (ARPC1A), mRNA.                                                                     |
| hnrpu     | 0.399 | -2.503 | heterogeneous nuclear ribonucleoprotein U (scaffold attachment factor A) (HNRPU), transcript variant 1, mRNA.                            |
| pop5      | 0.399 | -2.503 | processing of precursor 5, ribonuclease P/MRP subunit ( <i>S. cerevisiae</i> ) (POP5), transcript variant 2, mRNA.                       |
| kifc2     | 0.399 | -2.504 | kinesin family member C2 (KIFC2), mRNA.                                                                                                  |
| pnn       | 0.399 | -2.504 | pinin, desmosome associated protein (PNN), mRNA.                                                                                         |
| flj10154  | 0.399 | -2.504 | hypothetical protein FLJ10154 (FLJ10154), mRNA.                                                                                          |
| rpl7      | 0.399 | -2.504 | ribosomal protein L7 (RPL7), mRNA.                                                                                                       |
| loc649682 | 0.399 | -2.505 | PREDICTED: similar to ribosomal protein L31 (LOC649682), mRNA.                                                                           |
| pgrmc2    | 0.399 | -2.505 | progesterone receptor membrane component 2 (PGRMC2), mRNA.                                                                               |
| c5orf21   | 0.399 | -2.505 | chromosome 5 open reading frame 21 (C5orf21), mRNA.                                                                                      |
| vasp      | 0.399 | -2.506 | vasodilator-stimulated phosphoprotein (VASP), mRNA.                                                                                      |
| crop      | 0.399 | -2.506 | cisplatin resistance-associated overexpressed protein (CROP), transcript variant 2, mRNA.                                                |
| mettl7b   | 0.399 | -2.506 | methyltransferase like 7B (METTL7B), mRNA.                                                                                               |
| chmp4a    | 0.399 | -2.507 | chromatin modifying protein 4A (CHMP4A), mRNA.                                                                                           |
| loc57149  | 0.399 | -2.508 | hypothetical protein A-211C6.1 (LOC57149), mRNA.                                                                                         |
| selm      | 0.399 | -2.509 | selenoprotein M (SELM), mRNA.                                                                                                            |
| znf317    | 0.399 | -2.509 | zinc finger protein 317 (ZNF317), mRNA.                                                                                                  |
| hs.363526 | 0.398 | -2.509 | cDNA clone IMAGE:4837650                                                                                                                 |
| hist1h4h  | 0.398 | -2.51  | histone cluster 1, H4h (HIST1H4H), mRNA.                                                                                                 |
| bcl2l2    | 0.398 | -2.511 | BCL2-like 2 (BCL2L2), mRNA.                                                                                                              |
| hs.575038 | 0.398 | -2.511 | cDNA: FLJ21027 fis, clone CAE07110                                                                                                       |
| ipp       | 0.398 | -2.511 | intracisternal A particle-promoted polypeptide (IPP), mRNA.                                                                              |
| snf1lk    | 0.398 | -2.511 | SNF1-like kinase (SNF1LK), mRNA.                                                                                                         |
| gpc6      | 0.398 | -2.511 | glypican 6 (GPC6), mRNA.                                                                                                                 |
| plekha1   | 0.398 | -2.512 | pleckstrin homology domain containing, family A (phosphoinositide binding specific) member 1 (PLEKHA1), transcript variant 2, mRNA.      |
| c1orf57   | 0.398 | -2.513 | chromosome 1 open reading frame 57 (C1orf57), mRNA.                                                                                      |
| loc644972 | 0.398 | -2.513 | PREDICTED: similar to ribosomal protein S3a (LOC644972), mRNA.                                                                           |
| rhog      | 0.398 | -2.513 | ras homolog gene family, member G (rho G) (RHOG), mRNA.                                                                                  |
| st7       | 0.398 | -2.513 | suppression of tumorigenicity 7 (ST7), transcript variant a, mRNA.                                                                       |
| znf281    | 0.398 | -2.513 | zinc finger protein 281 (ZNF281), mRNA.                                                                                                  |
| thoc2     | 0.398 | -2.513 | THO complex 2 (THOC2), mRNA.                                                                                                             |
| gtf3c1    | 0.398 | -2.513 | general transcription factor IIIC, polypeptide 1, alpha 220kDa (GTF3C1), mRNA.                                                           |
| loc134997 | 0.398 | -2.514 | peptidylprolyl isomerase A processed pseudogene (LOC134997) on chromosome 6.                                                             |
| bxdc2     | 0.398 | -2.514 | brix domain containing 2 (BXDC2), mRNA.                                                                                                  |
| mterf     | 0.398 | -2.515 | mitochondrial transcription termination factor (MTERF), nuclear gene encoding mitochondrial protein, mRNA.                               |
| gpr137b   | 0.398 | -2.515 | G protein-coupled receptor 137B (GPR137B), mRNA.                                                                                         |
| perp      | 0.398 | -2.515 | PERP, TP53 apoptosis effector (PERP), mRNA.                                                                                              |
| myst3     | 0.398 | -2.515 | MYST histone acetyltransferase (monocytic leukemia) 3 (MYST3), mRNA.                                                                     |
| nifun     | 0.398 | -2.516 | iron-sulfur cluster scaffold homolog ( <i>E. coli</i> ) (ISCU), nuclear gene encoding mitochondrial protein, transcript variant 1, mRNA. |
| hs.31532  | 0.397 | -2.516 | cDNA FLJ26784 fis, clone PRS04220                                                                                                        |

|           |       |                                                                                                                                                                                                  |
|-----------|-------|--------------------------------------------------------------------------------------------------------------------------------------------------------------------------------------------------|
| bard1     | 0.397 | -2.517 BRCA1 associated RING domain 1 (BARD1), mRNA.                                                                                                                                             |
| map2k2    | 0.397 | -2.517 mitogen-activated protein kinase kinase 2 (MAP2K2), mRNA.                                                                                                                                 |
| elf1      | 0.397 | -2.517 E74-like factor 1 (ets domain transcription factor) (ELF1), mRNA.                                                                                                                         |
| smad3     | 0.397 | -2.517 SMAD family member 3 (SMAD3), mRNA.                                                                                                                                                       |
| cables1   | 0.397 | -2.517 Cdk5 and Abl enzyme substrate 1 (CABLES1), transcript variant 1, mRNA.                                                                                                                    |
| tpd52l2   | 0.397 | -2.517 tumor protein D52-like 2 (TPD52L2), transcript variant 3, mRNA.                                                                                                                           |
| mbtps1    | 0.397 | -2.517 membrane-bound transcription factor peptidase, site 1 (MBTPS1), mRNA.                                                                                                                     |
| loc285900 | 0.397 | -2.517 PREDICTED: similar to 60S ribosomal protein L6 (TAX-responsive enhancer element binding protein 107) (TAXREB107) (Neoplasm-related protein C140), transcript variant 3 (LOC285900), mRNA. |
| setd1a    | 0.397 | -2.518 SET domain containing 1A (SETD1A), mRNA.                                                                                                                                                  |
| s100a3    | 0.397 | -2.519 S100 calcium binding protein A3 (S100A3), mRNA.                                                                                                                                           |
| nol3      | 0.397 | -2.519 nucleolar protein 3 (apoptosis repressor with CARD domain) (NOL3), mRNA.                                                                                                                  |
| dxs9879e  | 0.397 | -2.519 DNA segment on chromosome X (unique) 9879 expressed sequence (DXS9879E), mRNA.                                                                                                            |
| myo5a     | 0.397 | -2.519 myosin VA (heavy polypeptide 12, myosin) (MYO5A), mRNA.                                                                                                                                   |
| ltb4dh    | 0.397 | -2.52 leukotriene B4 12-hydroxydehydrogenase (LTB4DH), mRNA.                                                                                                                                     |
| frap1     | 0.397 | -2.52 FK506 binding protein 12-rapamycin associated protein 1 (FRAP1), mRNA.                                                                                                                     |
| lmna      | 0.397 | -2.52 lamin A/C (LMNA), transcript variant 2, mRNA.                                                                                                                                              |
| c20orf94  | 0.397 | -2.52 chromosome 20 open reading frame 94 (C20orf94), mRNA.                                                                                                                                      |
| gnb2l1    | 0.397 | -2.521 guanine nucleotide binding protein (G protein), beta polypeptide 2-like 1 (GNB2L1), mRNA.                                                                                                 |
| ube2c     | 0.397 | -2.521 ubiquitin-conjugating enzyme E2C (UBE2C), transcript variant 5, mRNA.                                                                                                                     |
| pdgfrl    | 0.397 | -2.521 platelet-derived growth factor receptor-like (PDGFRL), mRNA.                                                                                                                              |
| ppp1r3c   | 0.396 | -2.523 protein phosphatase 1, regulatory (inhibitor) subunit 3C (PPP1R3C), mRNA.                                                                                                                 |
| psmd11    | 0.396 | -2.523 proteasome (prosome, macropain) 26S subunit, non-ATPase, 11 (PSMD11), mRNA.                                                                                                               |
| pscd1     | 0.396 | -2.524 pleckstrin homology, Sec7 and coiled-coil domains 1(cytohesin 1) (PSCD1), transcript variant 2, mRNA.                                                                                     |
| rexo2     | 0.396 | -2.524 REX2, RNA exonuclease 2 homolog ( <i>S. cerevisiae</i> ) (REXO2), mRNA.                                                                                                                   |
| hs.347034 | 0.396 | -2.524 cDNA FLJ27231 fis, clone SYN06240                                                                                                                                                         |
| anln      | 0.396 | -2.524 anillin, actin binding protein (ANLN), mRNA.                                                                                                                                              |
| cttn      | 0.396 | -2.524 cortactin (CTTN), transcript variant 1, mRNA.                                                                                                                                             |
| slc25a10  | 0.396 | -2.524 solute carrier family 25 (mitochondrial carrier; dicarboxylate transporter), member 10 (SLC25A10), mRNA.                                                                                  |
| edd1      | 0.396 | -2.524 E3 ubiquitin protein ligase, HECT domain containing, 1 (EDD1), mRNA.                                                                                                                      |
| c10orf58  | 0.396 | -2.525 chromosome 10 open reading frame 58 (C10orf58), mRNA.                                                                                                                                     |
| phip      | 0.396 | -2.525 pleckstrin homology domain interacting protein (PHIP), mRNA.                                                                                                                              |
| pmvk      | 0.396 | -2.525 phosphomevalonate kinase (PMVK), mRNA.                                                                                                                                                    |
| ceecam1   | 0.396 | -2.526 cerebral endothelial cell adhesion molecule 1 (CEECAM1), mRNA.                                                                                                                            |
| b4galt4   | 0.396 | -2.526 UDP-Gal:betaGlcNAc beta 1,4- galactosyltransferase, polypeptide 4 (B4GALT4), transcript variant 2, mRNA.                                                                                  |
| xrcc3     | 0.396 | -2.526 X-ray repair complementing defective repair in Chinese hamster cells 3 (XRCC3), mRNA.                                                                                                     |
| cdk2ap2   | 0.396 | -2.527 CDK2-associated protein 2 (CDK2AP2), mRNA.                                                                                                                                                |
| pdia4     | 0.396 | -2.527 protein disulfide isomerase family A, member 4 (PDIA4), mRNA.                                                                                                                             |
| sfrs6     | 0.396 | -2.527 splicing factor, arginine/serine-rich 6 (SFRS6), mRNA.                                                                                                                                    |
| aga       | 0.396 | -2.527 aspartylglucosaminidase (AGA), mRNA.                                                                                                                                                      |
| bhlhb9    | 0.396 | -2.528 basic helix-loop-helix domain containing, class B, 9 (BHLHB9), mRNA.                                                                                                                      |
| hs.538962 | 0.396 | -2.528 mRNA; cDNA DKFZp564C152 (from clone DKFZp564C152)                                                                                                                                         |

|           |       |                                                                                                                                     |
|-----------|-------|-------------------------------------------------------------------------------------------------------------------------------------|
| tiparp    | 0.396 | -2.528 TCDD-inducible poly(ADP-ribose) polymerase (TIPARP), mRNA.                                                                   |
| gorasp1   | 0.395 | -2.529 golgi reassembly stacking protein 1, 65kDa (GORASP1), mRNA.                                                                  |
| ptpn1     | 0.395 | -2.529 protein tyrosine phosphatase, non-receptor type 1 (PTPN1), mRNA.                                                             |
| c6orf136  | 0.395 | -2.529 chromosome 6 open reading frame 136 (C6orf136), mRNA.                                                                        |
| loc348262 | 0.395 | -2.529 hypothetical protein LOC348262 (LOC348262), mRNA.                                                                            |
| trpc4ap   | 0.395 | -2.529 transient receptor potential cation channel, subfamily C, member 4 associated protein (TRPC4AP), transcript variant 1, mRNA. |
| ppia      | 0.395 | -2.529 peptidylprolyl isomerase A (cyclophilin A) (PPIA), transcript variant 2, mRNA.                                               |
| ap2a2     | 0.395 | -2.529 adaptor-related protein complex 2, alpha 2 subunit (AP2A2), mRNA.                                                            |
| atp6v1c1  | 0.395 | -2.53 ATPase, H <sup>+</sup> transporting, lysosomal 42kDa, V1 subunit C1 (ATP6V1C1), transcript variant 1, mRNA.                   |
| ctsf      | 0.395 | -2.531 cathepsin F (CTSF), mRNA.                                                                                                    |
| cotl1     | 0.395 | -2.532 coactosin-like 1 (Dictyostelium) (COTL1), mRNA.                                                                              |
| flj20489  | 0.395 | -2.533 hypothetical protein FLJ20489 (FLJ20489), mRNA.                                                                              |
| topors    | 0.395 | -2.533 topoisomerase I binding, arginine/serine-rich (TOPORS), mRNA.                                                                |
| c14orf100 | 0.395 | -2.534 chromosome 14 open reading frame 100 (C14orf100), mRNA.                                                                      |
| kiaa0528  | 0.395 | -2.534 KIAA0528 (KIAA0528), mRNA.                                                                                                   |
| degs1     | 0.395 | -2.534 degenerative spermatocyte homolog 1, lipid desaturase (Drosophila) (DEGS1), transcript variant 1, mRNA.                      |
| lsm4      | 0.395 | -2.535 LSM4 homolog, U6 small nuclear RNA associated (S. cerevisiae) (LSM4), mRNA.                                                  |
| pitrm1    | 0.394 | -2.536 pitrilysin metallopeptidase 1 (PITRM1), mRNA.                                                                                |
| loc644615 | 0.394 | -2.536 PREDICTED: similar to Ras-related protein Rab-13 (LOC644615), mRNA.                                                          |
| yap1      | 0.394 | -2.536 Yes-associated protein 1, 65kDa (YAP1), mRNA.                                                                                |
| loc93081  | 0.394 | -2.536 chromosome 13 open reading frame 27 (C13orf27), mRNA.                                                                        |
| hs.512651 | 0.394 | -2.537 PREDICTED: hypothetical protein DKFZp761G2113 (DKFZp761G2113), mRNA                                                          |
| herc1     | 0.394 | -2.537 hect (homologous to the E6-AP (UBE3A) carboxyl terminus) domain and RCC1 (CHC1)-like domain (RLD) 1 (HERC1), mRNA.           |
| c1orf59   | 0.394 | -2.538 chromosome 1 open reading frame 59 (C1orf59), mRNA.                                                                          |
| wwc1      | 0.394 | -2.538 WW, C2 and coiled-coil domain containing 1 (WWC1), mRNA.                                                                     |
| trip11    | 0.394 | -2.538 thyroid hormone receptor interactor 11 (TRIP11), mRNA.                                                                       |
| nfkbia    | 0.394 | -2.539 nuclear factor of kappa light polypeptide gene enhancer in B-cells inhibitor, alpha (NFKBIA), mRNA.                          |
| mapbpip   | 0.394 | -2.54 mitogen-activated protein-binding protein-interacting protein (MAPBPIP), mRNA.                                                |
| ube2q2    | 0.394 | -2.54 ubiquitin-conjugating enzyme E2Q (putative) 2 (UBE2Q2), mRNA.                                                                 |
| stox2     | 0.394 | -2.54 storkhead box 2 (STOX2), mRNA.                                                                                                |
| ephx1     | 0.394 | -2.541 epoxide hydrolase 1, microsomal (xenobiotic) (EPHX1), mRNA.                                                                  |
| fam107b   | 0.393 | -2.542 family with sequence similarity 107, member B (FAM107B), mRNA.                                                               |
| cald1     | 0.393 | -2.542 caldesmon 1 (CALD1), transcript variant 1, mRNA.                                                                             |
| ccdc72    | 0.393 | -2.543 coiled-coil domain containing 72 (CCDC72), mRNA.                                                                             |
| ndufa4    | 0.393 | -2.544 NADH dehydrogenase (ubiquinone) 1 alpha subcomplex, 4, 9kDa (NDUFA4), nuclear gene encoding mitochondrial protein, mRNA.     |
| tssc4     | 0.393 | -2.545 tumor suppressing subtransferable candidate 4 (TSSC4), mRNA.                                                                 |
| atp1b2    | 0.393 | -2.545 ATPase, Na <sup>+</sup> /K <sup>+</sup> transporting, beta 2 polypeptide (ATP1B2), mRNA.                                     |
| sh3md2    | 0.393 | -2.545 SH3 multiple domains 2 (SH3MD2), mRNA.                                                                                       |
| tpar1     | 0.393 | -2.545 transmembrane protein 165 (TMEM165), mRNA.                                                                                   |
| mgc4618   | 0.393 | -2.546 transmembrane protein 175 (TMEM175), mRNA.                                                                                   |
| elp3      | 0.393 | -2.546 elongation protein 3 homolog (S. cerevisiae) (ELP3), mRNA.                                                                   |
| hs.531457 | 0.393 | -2.547 cDNA FLJ37595 fis, clone BRCOC2007864                                                                                        |

|           |       |                                                                                                                |
|-----------|-------|----------------------------------------------------------------------------------------------------------------|
| ppih      | 0.392 | -2.548 peptidylprolyl isomerase H (cyclophilin H) (PPIH), mRNA.                                                |
| tom1      | 0.392 | -2.549 target of myb1 (chicken) (TOM1), mRNA.                                                                  |
| rpl28     | 0.392 | -2.549 ribosomal protein L28 (RPL28), mRNA.                                                                    |
| hras      | 0.392 | -2.549 v-Ha-ras Harvey rat sarcoma viral oncogene homolog (HRAS), transcript variant 2, mRNA.                  |
| pja2      | 0.392 | -2.55 praja 2, RING-H2 motif containing (PJA2), mRNA.                                                          |
| numa1     | 0.392 | -2.551 nuclear mitotic apparatus protein 1 (NUMA1), mRNA.                                                      |
| commd9    | 0.392 | -2.551 COMM domain containing 9 (COMMD9), mRNA.                                                                |
| cdca4     | 0.392 | -2.551 cell division cycle associated 4 (CDCA4), transcript variant 13, mRNA.                                  |
| pofut2    | 0.392 | -2.552 protein O-fucosyltransferase 2 (POFUT2), transcript variant 3, mRNA.                                    |
| arse      | 0.392 | -2.552 arylsulfatase E (chondrodysplasia punctata 1) (ARSE), mRNA.                                             |
| serp1     | 0.392 | -2.552 stress-associated endoplasmic reticulum protein 1 (SERP1), mRNA.                                        |
| ixl       | 0.392 | -2.552 mediator complex subunit 29 (MED29), mRNA.                                                              |
| impdh2    | 0.392 | -2.553 IMP (inosine monophosphate) dehydrogenase 2 (IMPDH2), mRNA.                                             |
| mgc17839  | 0.392 | -2.554 transmembrane protein 136 (TMEM136), mRNA.                                                              |
| c16orf56  | 0.392 | -2.554 chromosome 16 open reading frame 56 (C16orf56), mRNA.                                                   |
| kif21a    | 0.392 | -2.554 kinesin family member 21A (KIF21A), mRNA.                                                               |
| zdhhc11   | 0.391 | -2.555 PREDICTED: zinc finger, DHHC-type containing 11 (ZDHHC11), mRNA.                                        |
| phca      | 0.391 | -2.555 phytoceramidase, alkaline (PHCA), mRNA.                                                                 |
| ndufaf1   | 0.391 | -2.557 NADH dehydrogenase (ubiquinone) 1 alpha subcomplex, assembly factor 1 (NDUFAF1), mRNA.                  |
| hnrpul1   | 0.391 | -2.557 heterogeneous nuclear ribonucleoprotein U-like 1 (HNRPUL1), transcript variant 4, mRNA.                 |
| col7a1    | 0.391 | -2.557 collagen, type VII, alpha 1 (epidermolysis bullosa, dystrophic, dominant and recessive) (COL7A1), mRNA. |
| pik3r1    | 0.391 | -2.558 phosphoinositide-3-kinase, regulatory subunit 1 (p85 alpha) (PIK3R1), transcript variant 2, mRNA.       |
| mtr       | 0.391 | -2.559 5-methyltetrahydrofolate-homocysteine methyltransferase (MTR), mRNA.                                    |
| drap1     | 0.391 | -2.56 DR1-associated protein 1 (negative cofactor 2 alpha) (DRAP1), mRNA.                                      |
| trip6     | 0.391 | -2.56 thyroid hormone receptor interactor 6 (TRIP6), mRNA.                                                     |
| actn4     | 0.391 | -2.56 actinin, alpha 4 (ACTN4), mRNA.                                                                          |
| loc643438 | 0.391 | -2.561 PREDICTED: similar to Huntingtin interacting protein K (LOC643438), mRNA.                               |
| c17orf32  | 0.39  | -2.561 chromosome 17 open reading frame 32 (C17orf32), mRNA.                                                   |
| c12orf48  | 0.39  | -2.561 chromosome 12 open reading frame 48 (C12orf48), mRNA.                                                   |
| trmt12    | 0.39  | -2.561 tRNA methyltransferase 12 homolog (S. cerevisiae) (TRMT12), mRNA.                                       |
| rab5c     | 0.39  | -2.561 RAB5C, member RAS oncogene family (RAB5C), transcript variant 2, mRNA.                                  |
| dpp9      | 0.39  | -2.562 dipeptidyl-peptidase 9 (DPP9), mRNA.                                                                    |
| kpna3     | 0.39  | -2.562 karyopherin alpha 3 (importin alpha 4) (KPNA3), mRNA.                                                   |
| c14orf106 | 0.39  | -2.562 chromosome 14 open reading frame 106 (C14orf106), mRNA.                                                 |
| scd       | 0.39  | -2.562 stearoyl-CoA desaturase (delta-9-desaturase) (SCD), mRNA.                                               |
| mgc16028  | 0.39  | -2.563 chromosome 14 open reading frame 179 (C14orf179), mRNA.                                                 |
| asf1b     | 0.39  | -2.563 ASF1 anti-silencing function 1 homolog B (S. cerevisiae) (ASF1B), mRNA.                                 |
| rheb      | 0.39  | -2.563 Ras homolog enriched in brain (RHEB), mRNA.                                                             |
| ralbp1    | 0.39  | -2.564 ralA binding protein 1 (RALBP1), mRNA.                                                                  |
| loc649821 | 0.39  | -2.564 PREDICTED: similar to 60S ribosomal protein L14 (CAG-ISL 7), transcript variant 1 (LOC649821), mRNA.    |
| c7orf27   | 0.39  | -2.564 chromosome 7 open reading frame 27 (C7orf27), mRNA.                                                     |
| snapc5    | 0.39  | -2.565 small nuclear RNA activating complex, polypeptide 5, 19kDa (SNAPC5), mRNA.                              |

|           |       |        |                                                                                                                                                                                                                        |
|-----------|-------|--------|------------------------------------------------------------------------------------------------------------------------------------------------------------------------------------------------------------------------|
| hspc142   | 0.39  | -2.565 | chromosome 19 open reading frame 62 (C19orf62), transcript variant 2, mRNA.                                                                                                                                            |
| hcfc1     | 0.39  | -2.565 | host cell factor C1 (VP16-accessory protein) (HCFC1), mRNA.                                                                                                                                                            |
| tceal8    | 0.39  | -2.565 | transcription elongation factor A (SII)-like 8 (TCEAL8), transcript variant 1, mRNA.                                                                                                                                   |
| ndufs3    | 0.39  | -2.566 | NADH dehydrogenase (ubiquinone) Fe-S protein 3, 30kDa (NADH-coenzyme Q reductase) (NDUFS3), mRNA.                                                                                                                      |
| atp6v1f   | 0.39  | -2.566 | ATPase, H <sup>+</sup> transporting, lysosomal 14kDa, V1 subunit F (ATP6V1F), mRNA.                                                                                                                                    |
| stx4a     | 0.39  | -2.566 | syntaxin 4 (STX4), mRNA.                                                                                                                                                                                               |
| psma4     | 0.389 | -2.568 | proteasome (prosome, macropain) subunit, alpha type, 4 (PSMA4), mRNA.                                                                                                                                                  |
| loc651423 | 0.389 | -2.568 | PREDICTED: similar to mitogen-activated protein kinase kinase 3 isoform A (LOC651423), mRNA.                                                                                                                           |
| loc389674 | 0.389 | -2.568 | PREDICTED: similar to Heterogeneous nuclear ribonucleoprotein A1 (Helix-destabilizing protein) (Single-strand binding protein) (hnRNP core protein A1) (HDP-1) (Topoisomerase-inhibitor suppressed) (LOC389674), mRNA. |
| ccdc127   | 0.389 | -2.569 | coiled-coil domain containing 127 (CCDC127), mRNA.                                                                                                                                                                     |
| ctsd      | 0.389 | -2.569 | cathepsin D (CTSD), mRNA.                                                                                                                                                                                              |
| lsp1      | 0.389 | -2.569 | lymphocyte-specific protein 1 (LSP1), transcript variant 3, mRNA.                                                                                                                                                      |
| clic3     | 0.389 | -2.569 | chloride intracellular channel 3 (CLIC3), mRNA.                                                                                                                                                                        |
| ckb       | 0.389 | -2.569 | creatine kinase, brain (CKB), mRNA.                                                                                                                                                                                    |
| eif2b5    | 0.389 | -2.57  | eukaryotic translation initiation factor 2B, subunit 5 epsilon, 82kDa (EIF2B5), mRNA.                                                                                                                                  |
| procr     | 0.389 | -2.57  | protein C receptor, endothelial (EPCR) (PROCR), mRNA.                                                                                                                                                                  |
| rpp40     | 0.389 | -2.57  | ribonuclease P 40kDa subunit (RPP40), mRNA.                                                                                                                                                                            |
| acot4     | 0.389 | -2.571 | acyl-CoA thioesterase 4 (ACOT4), mRNA.                                                                                                                                                                                 |
| rbm4b     | 0.389 | -2.571 | RNA binding motif protein 4B (RBM4B), mRNA.                                                                                                                                                                            |
| loc649518 | 0.389 | -2.572 | PREDICTED: similar to 40S ribosomal protein S26 (LOC649518), mRNA.                                                                                                                                                     |
| rab36     | 0.389 | -2.572 | RAB36, member RAS oncogene family (RAB36), mRNA.                                                                                                                                                                       |
| actr3     | 0.389 | -2.572 | ARP3 actin-related protein 3 homolog (yeast) (ACTR3), mRNA.                                                                                                                                                            |
| mgc5242   | 0.389 | -2.573 | chromosome 7 open reading frame 49 (C7orf49), mRNA.                                                                                                                                                                    |
| tram2     | 0.389 | -2.573 | translocation associated membrane protein 2 (TRAM2), mRNA.                                                                                                                                                             |
| foxred2   | 0.389 | -2.573 | FAD-dependent oxidoreductase domain containing 2 (FOXRED2), mRNA.                                                                                                                                                      |
| tcea2     | 0.389 | -2.573 | transcription elongation factor A (SII), 2 (TCEA2), transcript variant 2, mRNA.                                                                                                                                        |
| zdhhc7    | 0.389 | -2.573 | zinc finger, DHHC-type containing 7 (ZDHHC7), mRNA.                                                                                                                                                                    |
| ppa2      | 0.389 | -2.574 | inorganic pyrophosphatase 2 (PPA2), transcript variant 1, mRNA.                                                                                                                                                        |
| ddah2     | 0.388 | -2.575 | dimethylarginine dimethylaminohydrolase 2 (DDAH2), mRNA.                                                                                                                                                               |
| glce      | 0.388 | -2.575 | glucuronic acid epimerase (GLCE), mRNA.                                                                                                                                                                                |
| loc88523  | 0.388 | -2.576 | CG016 (LOC88523), mRNA.                                                                                                                                                                                                |
| exosc4    | 0.388 | -2.576 | exosome component 4 (EXOSC4), mRNA.                                                                                                                                                                                    |
| snrpa     | 0.388 | -2.577 | small nuclear ribonucleoprotein polypeptide A (SNRPA), mRNA.                                                                                                                                                           |
| rab40b    | 0.388 | -2.577 | RAB40B, member RAS oncogene family (RAB40B), mRNA.                                                                                                                                                                     |
| ndrg1     | 0.388 | -2.577 | N-myc downstream regulated gene 1 (NDRG1), mRNA.                                                                                                                                                                       |
| kiaa0830  | 0.388 | -2.577 | PREDICTED: KIAA0830 protein, transcript variant 4 (KIAA0830), mRNA.                                                                                                                                                    |
| mybbp1a   | 0.388 | -2.578 | MYB binding protein (P160) 1a (MYBBP1A), mRNA.                                                                                                                                                                         |
| amy1c     | 0.388 | -2.579 | amylase, alpha 1C (salivary) (AMY1C), mRNA.                                                                                                                                                                            |
| srp19     | 0.388 | -2.579 | signal recognition particle 19kDa (SRP19), mRNA.                                                                                                                                                                       |
| hs.482497 | 0.388 | -2.579 | cDNA FLJ42778 fis, clone BRAWH3005146                                                                                                                                                                                  |
| fuca1     | 0.388 | -2.579 | fucosidase, alpha-L- 1, tissue (FUCA1), mRNA.                                                                                                                                                                          |

|           |       |                                                                                                                        |
|-----------|-------|------------------------------------------------------------------------------------------------------------------------|
| axl       | 0.388 | -2.58 AXL receptor tyrosine kinase (AXL), transcript variant 1, mRNA.                                                  |
| prkab1    | 0.388 | -2.58 protein kinase, AMP-activated, beta 1 non-catalytic subunit (PRKAB1), mRNA.                                      |
| cripak    | 0.388 | -2.581 cysteine-rich PAK1 inhibitor (CRIPAK), mRNA.                                                                    |
| c18orf56  | 0.388 | -2.581 chromosome 18 open reading frame 56 (C18orf56), mRNA.                                                           |
| rbm12b    | 0.387 | -2.581 RNA binding motif protein 12B (RBM12B), mRNA.                                                                   |
| nrd1      | 0.387 | -2.581 nardilysin (N-arginine dibasic convertase) (NRD1), mRNA.                                                        |
| plekhg2   | 0.387 | -2.582 pleckstrin homology domain containing, family G (with RhoGef domain) member 2 (PLEKHG2), mRNA.                  |
| c14orf112 | 0.387 | -2.582 chromosome 14 open reading frame 112 (C14orf112), mRNA.                                                         |
| tada3l    | 0.387 | -2.582 transcriptional adaptor 3 (NGG1 homolog, yeast)-like (TADA3L), transcript variant 2, mRNA.                      |
| cerk      | 0.387 | -2.583 ceramide kinase (CERK), transcript variant 1, mRNA.                                                             |
| tsen34    | 0.387 | -2.583 tRNA splicing endonuclease 34 homolog ( <i>S. cerevisiae</i> ) (TSEN34), mRNA.                                  |
| cxorf6    | 0.387 | -2.583 chromosome X open reading frame 6 (CXorf6), mRNA.                                                               |
| mcts1     | 0.387 | -2.584 malignant T cell amplified sequence 1 (MCTS1), mRNA.                                                            |
| kiaa1904  | 0.387 | -2.584 KIAA1904 protein (KIAA1904), mRNA.                                                                              |
| ptplb     | 0.387 | -2.584 protein tyrosine phosphatase-like (proline instead of catalytic arginine), member b (PTPLB), mRNA.              |
| chmp1b    | 0.387 | -2.585 chromatin modifying protein 1B (CHMP1B), mRNA.                                                                  |
| neil2     | 0.387 | -2.586 nei like 2 ( <i>E. coli</i> ) (NEIL2), mRNA.                                                                    |
| pcca      | 0.387 | -2.586 propionyl Coenzyme A carboxylase, alpha polypeptide (PCCA), mRNA.                                               |
| hscb      | 0.387 | -2.586 HscB iron-sulfur cluster co-chaperone homolog ( <i>E. coli</i> ) (HSCB), mRNA.                                  |
| psmb5     | 0.387 | -2.586 proteasome (prosome, macropain) subunit, beta type, 5 (PSMB5), mRNA.                                            |
| cebpz     | 0.387 | -2.587 CCAAT/enhancer binding protein zeta (CEBPZ), mRNA.                                                              |
| scoc      | 0.387 | -2.587 short coiled-coil protein (SCOC), mRNA.                                                                         |
| tpm4      | 0.386 | -2.588 tropomyosin 4 (TPM4), mRNA.                                                                                     |
| rhoq      | 0.386 | -2.589 ras homolog gene family, member Q (RHOQ), mRNA.                                                                 |
| kiaa0319l | 0.386 | -2.589 KIAA0319-like (KIAA0319L), transcript variant 2, mRNA.                                                          |
| als2cr13  | 0.386 | -2.59 amyotrophic lateral sclerosis 2 (juvenile) chromosome region, candidate 13 (ALS2CR13), mRNA.                     |
| mgat1     | 0.386 | -2.59 mannosyl (alpha-1,3-)-glycoprotein beta-1,2-N-acetylglucosaminyltransferase (MGAT1), mRNA.                       |
| ahr       | 0.386 | -2.592 aryl hydrocarbon receptor (AHR), mRNA.                                                                          |
| hs.190748 | 0.386 | -2.592 PREDICTED: hypothetical LOC388214 (LOC388214), mRNA                                                             |
| nudt22    | 0.386 | -2.592 nudix (nucleoside diphosphate linked moiety X)-type motif 22 (NUDT22), mRNA.                                    |
| hax1      | 0.386 | -2.592 HCLS1 associated protein X-1 (HAX1), transcript variant 1, mRNA.                                                |
| sharpin   | 0.386 | -2.593 SHANK-associated RH domain interactor (SHARPIN), mRNA.                                                          |
| ppcs      | 0.386 | -2.593 phosphopantothencysteine synthetase (PPCS), mRNA.                                                               |
| tmem5     | 0.386 | -2.593 transmembrane protein 5 (TMEM5), mRNA.                                                                          |
| ubl3      | 0.386 | -2.594 ubiquitin-like 3 (UBL3), mRNA.                                                                                  |
| trappc6a  | 0.385 | -2.594 trafficking protein particle complex 6A (TRAPPC6A), mRNA.                                                       |
| cenpj     | 0.385 | -2.594 centromere protein J (CENPJ), mRNA.                                                                             |
| farsla    | 0.385 | -2.595 phenylalanine-tRNA synthetase-like, alpha subunit (FARSLA), mRNA.                                               |
| snip1     | 0.385 | -2.596 Smad nuclear interacting protein 1 (SNIP1), mRNA.                                                               |
| tceb2     | 0.385 | -2.597 transcription elongation factor B (SIII), polypeptide 2 (18kDa, elongin B) (TCEB2), transcript variant 1, mRNA. |
| nudt1     | 0.385 | -2.597 nudix (nucleoside diphosphate linked moiety X)-type motif 1 (NUDT1), transcript variant 2A, mRNA.               |
| gca       | 0.385 | -2.597 grancalcin, EF-hand calcium binding protein (GCA), mRNA.                                                        |

|           |       |                                                                                                                                                |
|-----------|-------|------------------------------------------------------------------------------------------------------------------------------------------------|
| leprel2   | 0.385 | -2.597 leprecan-like 2 (LEPREL2), mRNA.                                                                                                        |
| sepw1     | 0.385 | -2.598 selenoprotein W, 1 (SEPW1), mRNA.                                                                                                       |
| cad       | 0.385 | -2.598 carbamoyl-phosphate synthetase 2, aspartate transcarbamylase, and dihydroorotase (CAD), mRNA.                                           |
| top1mt    | 0.385 | -2.598 topoisomerase (DNA) I, mitochondrial (TOP1MT), nuclear gene encoding mitochondrial protein, mRNA.                                       |
| sdsl      | 0.385 | -2.598 serine dehydratase-like (SDSL), mRNA.                                                                                                   |
| itpa      | 0.385 | -2.6 inosine triphosphatase (nucleoside triphosphate pyrophosphatase) (ITPA), transcript variant 2, mRNA.                                      |
| tesc      | 0.385 | -2.6 tescalcin (TESC), mRNA.                                                                                                                   |
| hs.25892  | 0.385 | -2.6 cDNA FLJ38860 fis, clone MESAN2011977                                                                                                     |
| prpf8     | 0.385 | -2.6 PRP8 pre-mRNA processing factor 8 homolog (yeast) (PRPF8), mRNA.                                                                          |
| rer1      | 0.385 | -2.601 RER1 retention in endoplasmic reticulum 1 homolog ( <i>S. cerevisiae</i> ) (RER1), mRNA.                                                |
| c14orf169 | 0.384 | -2.601 chromosome 14 open reading frame 169 (C14orf169), mRNA.                                                                                 |
| impad1    | 0.384 | -2.602 inositol monophosphatase domain containing 1 (IMPAD1), mRNA.                                                                            |
| mgc10433  | 0.384 | -2.602 hypothetical protein MGC10433 (MGC10433), mRNA.                                                                                         |
| sumf2     | 0.384 | -2.603 sulfatase modifying factor 2 (SUMF2), transcript variant 4, mRNA.                                                                       |
| aph1b     | 0.384 | -2.604 anterior pharynx defective 1 homolog B ( <i>C. elegans</i> ) (APH1B), mRNA.                                                             |
| moxd1     | 0.384 | -2.604 monooxygenase, DBH-like 1 (MOXD1), transcript variant 1, mRNA.                                                                          |
| hs.444999 | 0.384 | -2.604 BX114974 NCI_CGAP_Kid3 cDNA clone IMAGp998C023886, mRNA sequence                                                                        |
| ing2      | 0.384 | -2.605 inhibitor of growth family, member 2 (ING2), mRNA.                                                                                      |
| ddb2      | 0.384 | -2.605 damage-specific DNA binding protein 2, 48kDa (DDB2), mRNA.                                                                              |
| brca1     | 0.384 | -2.605 breast cancer 1, early onset (BRCA1), transcript variant BRCA1b, mRNA.                                                                  |
| nsun5     | 0.384 | -2.605 NOL1/NOP2/Sun domain family, member 5 (NSUN5), transcript variant 2, mRNA.                                                              |
| npepl1    | 0.384 | -2.606 aminopeptidase-like 1 (NPEPL1), mRNA.                                                                                                   |
| ubap2l    | 0.384 | -2.606 ubiquitin associated protein 2-like (UBAP2L), mRNA.                                                                                     |
| st13      | 0.384 | -2.606 suppression of tumorigenicity 13 (colon carcinoma) (Hsp70 interacting protein) (ST13), mRNA.                                            |
| wbp1      | 0.384 | -2.606 WW domain binding protein 1 (WBP1), mRNA.                                                                                               |
| snrpc     | 0.384 | -2.607 small nuclear ribonucleoprotein polypeptide C (SNRPC), mRNA.                                                                            |
| hs.444329 | 0.384 | -2.607 mRNA; cDNA DKFZp686H20120 (from clone DKFZp686H20120)                                                                                   |
| nudt2     | 0.383 | -2.608 nudix (nucleoside diphosphate linked moiety X)-type motif 2 (NUDT2), transcript variant 3, mRNA.                                        |
| loc387753 | 0.383 | -2.608 PREDICTED: similar to 60S ribosomal protein L21 (LOC387753), mRNA.                                                                      |
| hs.193784 | 0.383 | -2.608 mRNA; cDNA DKFZp586K1922 (from clone DKFZp586K1922)                                                                                     |
| tceal1    | 0.383 | -2.609 transcription elongation factor A (SII)-like 1 (TCEAL1), transcript variant 3, mRNA.                                                    |
| gdi1      | 0.383 | -2.609 GDP dissociation inhibitor 1 (GDI1), mRNA.                                                                                              |
| tars      | 0.383 | -2.609 threonyl-tRNA synthetase (TARS), mRNA.                                                                                                  |
| trim65    | 0.383 | -2.61 tripartite motif-containing 65 (TRIM65), mRNA.                                                                                           |
| loc440704 | 0.383 | -2.611 PREDICTED: hypothetical gene supported by BC042042 (LOC440704), mRNA.                                                                   |
| loc220433 | 0.383 | -2.611 PREDICTED: similar to 40S ribosomal protein S4, X isoform (LOC220433), mRNA.                                                            |
| anxa8l1   | 0.383 | -2.611 annexin A8 (ANXA8), mRNA. XM_931361 XM_931369 XM_931374 XM_931375 XM_931378 XM_931383 XM_931388 XM_931391 XM_931399 XM_931404 XM_931411 |
| tmem113   | 0.383 | -2.611 transmembrane protein 113 (TMEM113), mRNA.                                                                                              |
| kiaa0446  | 0.383 | -2.612 solute carrier family 25, member 44 (SLC25A44), mRNA.                                                                                   |
| blcap     | 0.383 | -2.613 bladder cancer associated protein (BLCAP), mRNA.                                                                                        |
| hs.201854 | 0.383 | -2.613 Homo sapiens, clone IMAGE:4429392, mRNA, partial cds                                                                                    |



|              |       |                                                                                                                                       |
|--------------|-------|---------------------------------------------------------------------------------------------------------------------------------------|
| midn         | 0.383 | -2.613 midnolin (MIDN), mRNA.                                                                                                         |
| txndc9       | 0.383 | -2.613 thioredoxin domain containing 9 (TXNDC9), mRNA.                                                                                |
| jub          | 0.383 | -2.613 jub, ajuba homolog ( <i>Xenopus laevis</i> ) (JUB), transcript variant 1, mRNA.                                                |
| plod1        | 0.383 | -2.614 procollagen-lysine 1, 2-oxoglutarate 5-dioxygenase 1 (PLOD1), mRNA.                                                            |
| flj12118     | 0.382 | -2.615 cysteinyl-tRNA synthetase 2, mitochondrial (putative) (CARS2), mRNA.                                                           |
| dkfzp686l181 | 0.382 | -2.615 lin-54 homolog ( <i>C. elegans</i> ) (LIN54), mRNA.                                                                            |
| c2orf30      | 0.382 | -2.617 chromosome 2 open reading frame 30 (C2orf30), mRNA.                                                                            |
| lrrc14       | 0.382 | -2.618 leucine rich repeat containing 14 (LRRC14), mRNA.                                                                              |
| crkrs        | 0.382 | -2.618 Cdc2-related kinase, arginine/serine-rich (CRKRS), mRNA.                                                                       |
| lcor         | 0.382 | -2.618 ligand dependent nuclear receptor corepressor (LCOR), mRNA.                                                                    |
| arhgdia      | 0.382 | -2.618 Rho GDP dissociation inhibitor (GDI) alpha (ARHGDI), mRNA.                                                                     |
| slc16a4      | 0.382 | -2.619 solute carrier family 16, member 4 (monocarboxylic acid transporter 5) (SLC16A4), mRNA.                                        |
| gtpbp4       | 0.382 | -2.619 GTP binding protein 4 (GTPBP4), mRNA.                                                                                          |
| lta4h        | 0.382 | -2.619 leukotriene A4 hydrolase (LTA4H), mRNA.                                                                                        |
| rbm23        | 0.382 | -2.619 RNA binding motif protein 23 (RBM23), transcript variant 3, mRNA.                                                              |
| pisd         | 0.382 | -2.619 phosphatidylserine decarboxylase (PISD), mRNA.                                                                                 |
| trim25       | 0.382 | -2.621 tripartite motif-containing 25 (TRIM25), mRNA.                                                                                 |
| gst01        | 0.382 | -2.621 glutathione S-transferase omega 1 (GSTO1), mRNA.                                                                               |
| pdss2        | 0.382 | -2.621 prenyl (decaprenyl) diphosphate synthase, subunit 2 (PDSS2), mRNA.                                                             |
| loc56902     | 0.381 | -2.621 partner of NOB1 homolog ( <i>S. cerevisiae</i> ) (PNO1), mRNA.                                                                 |
| tcirg1       | 0.381 | -2.623 T-cell, immune regulator 1, ATPase, H <sup>+</sup> transporting, lysosomal V0 subunit A3 (TCIRG1), transcript variant 1, mRNA. |
| pdpr         | 0.381 | -2.623 pyruvate dehydrogenase phosphatase regulatory subunit (PDPR), mRNA.                                                            |
| grn          | 0.381 | -2.626 granulin (GRN), transcript variant 2, mRNA.                                                                                    |
| c8orf38      | 0.381 | -2.627 chromosome 8 open reading frame 38 (C8orf38), mRNA.                                                                            |
| rpp25        | 0.381 | -2.627 ribonuclease P 25kDa subunit (RPP25), mRNA.                                                                                    |
| hoxc8        | 0.381 | -2.627 homeobox C8 (HOXC8), mRNA.                                                                                                     |
| ciapin1      | 0.381 | -2.627 cytokine induced apoptosis inhibitor 1 (CIAPIN1), mRNA.                                                                        |
| eif4g3       | 0.381 | -2.627 eukaryotic translation initiation factor 4 gamma, 3 (EIF4G3), mRNA.                                                            |
| sec23b       | 0.381 | -2.627 Sec23 homolog B ( <i>S. cerevisiae</i> ) (SEC23B), transcript variant 2, mRNA.                                                 |
| por          | 0.381 | -2.627 P450 (cytochrome) oxidoreductase (POR), mRNA.                                                                                  |
| tspan4       | 0.381 | -2.628 tetraspanin 4 (TSPAN4), transcript variant 2, mRNA.                                                                            |
| tm4sf1       | 0.381 | -2.628 transmembrane 4 L six family member 1 (TM4SF1), mRNA.                                                                          |
| ddx17        | 0.381 | -2.628 DEAD (Asp-Glu-Ala-Asp) box polypeptide 17 (DDX17), transcript variant 1, mRNA.                                                 |
| btbd1        | 0.381 | -2.628 BTB (POZ) domain containing 1 (BTBD1), transcript variant 1, mRNA.                                                             |
| nudt14       | 0.381 | -2.628 nudix (nucleoside diphosphate linked moiety X)-type motif 14 (NUDT14), mRNA.                                                   |
| tubb6        | 0.38  | -2.628 PREDICTED: tubulin, beta 6 (TUBB6), mRNA.                                                                                      |
| znf526       | 0.38  | -2.629 zinc finger protein 526 (ZNF526), mRNA.                                                                                        |
| pfdn6        | 0.38  | -2.63 prefoldin subunit 6 (PFDN6), mRNA.                                                                                              |
| mrps26       | 0.38  | -2.63 mitochondrial ribosomal protein S26 (MRPS26), nuclear gene encoding mitochondrial protein, mRNA.                                |
| nr1h3        | 0.38  | -2.631 nuclear receptor subfamily 1, group H, member 3 (NR1H3), mRNA.                                                                 |
| camsap11l    | 0.38  | -2.631 calmodulin regulated spectrin-associated protein 1-like 1 (CAMSAP1L1), mRNA.                                                   |
| aspm         | 0.38  | -2.631 asp (abnormal spindle)-like, microcephaly associated ( <i>Drosophila</i> ) (ASPM), mRNA.                                       |

|           |       |                                                                                                                           |
|-----------|-------|---------------------------------------------------------------------------------------------------------------------------|
| ptd015    | 0.38  | -2.632 chromosome 11 open reading frame 67 (C11orf67), mRNA.                                                              |
| mlstd2    | 0.38  | -2.632 male sterility domain containing 2 (MLSTD2), mRNA.                                                                 |
| hcfc1r1   | 0.38  | -2.632 host cell factor C1 regulator 1 (XPO1 dependent) (HCFC1R1), transcript variant 2, mRNA.                            |
| rnu35b    | 0.38  | -2.632 small nucleolar RNA, C/D box 35B (SNORD35B) on chromosome 19.                                                      |
| hs.551128 | 0.38  | -2.633 MSTP131 (MST131) mRNA, complete cds                                                                                |
| lrrc47    | 0.38  | -2.633 leucine rich repeat containing 47 (LRR47), mRNA.                                                                   |
| sfrs10    | 0.38  | -2.633 splicing factor, arginine/serine-rich 10 (transformer 2 homolog, Drosophila) (SFRS10), mRNA.                       |
| c18orf21  | 0.38  | -2.633 chromosome 18 open reading frame 21 (C18orf21), mRNA.                                                              |
| wdr72     | 0.38  | -2.634 WD repeat domain 72 (WDR72), mRNA.                                                                                 |
| yy1       | 0.379 | -2.635 YY1 transcription factor (YY1), mRNA.                                                                              |
| rab8b     | 0.379 | -2.635 RAB8B, member RAS oncogene family (RAB8B), mRNA.                                                                   |
| smarcc1   | 0.379 | -2.635 SWI/SNF related, matrix associated, actin dependent regulator of chromatin, subfamily c, member 1 (SMARCC1), mRNA. |
| kiaa0999  | 0.379 | -2.636 KIAA0999 protein (KIAA0999), mRNA.                                                                                 |
| ilvbl     | 0.379 | -2.636 ilvB (bacterial acetolactate synthase)-like (ILVBL), mRNA.                                                         |
| sephs2    | 0.379 | -2.637 selenophosphate synthetase 2 (SEPHS2), mRNA.                                                                       |
| kiaa0664  | 0.379 | -2.637 KIAA0664 (KIAA0664), mRNA.                                                                                         |
| loc402055 | 0.379 | -2.638 similar to SRR1-like protein (LOC402055), mRNA.                                                                    |
| samd9     | 0.379 | -2.638 sterile alpha motif domain containing 9 (SAMD9), mRNA.                                                             |
| ddit4l    | 0.379 | -2.64 DNA-damage-inducible transcript 4-like (DDIT4L), mRNA.                                                              |
| pip5k2c   | 0.379 | -2.641 phosphatidylinositol-4-phosphate 5-kinase, type II, gamma (PIP5K2C), mRNA.                                         |
| hSDL2     | 0.379 | -2.641 hydroxysteroid dehydrogenase like 2 (HSDL2), mRNA.                                                                 |
| loc440160 | 0.379 | -2.641 PREDICTED: hypothetical LOC440160 (LOC440160), mRNA.                                                               |
| ldoc1     | 0.379 | -2.641 leucine zipper, down-regulated in cancer 1 (LDOC1), mRNA.                                                          |
| immp2l    | 0.378 | -2.642 IMP2 inner mitochondrial membrane peptidase-like (S. cerevisiae) (IMMP2L), mRNA.                                   |
| c11orf51  | 0.378 | -2.642 chromosome 11 open reading frame 51 (C11orf51), mRNA.                                                              |
| pole      | 0.378 | -2.643 polymerase (DNA directed), epsilon (POLE), mRNA.                                                                   |
| sf3b4     | 0.378 | -2.643 splicing factor 3b, subunit 4, 49kDa (SF3B4), mRNA.                                                                |
| loc391370 | 0.378 | -2.644 PREDICTED: similar to ribosomal protein S12 (LOC391370), mRNA.                                                     |
| flj11259  | 0.378 | -2.645 hypothetical protein FLJ11259 (FLJ11259), mRNA.                                                                    |
| drb1      | 0.378 | -2.646 developmentally regulated RNA-binding protein 1 (DRB1), mRNA.                                                      |
| myl5      | 0.378 | -2.646 myosin, light chain 5, regulatory (MYL5), mRNA.                                                                    |
| dnase1l1  | 0.378 | -2.646 deoxyribonuclease I-like 1 (DNASE1L1), transcript variant 2, mRNA.                                                 |
| c20orf108 | 0.378 | -2.646 chromosome 20 open reading frame 108 (C20orf108), mRNA.                                                            |
| mgc52000  | 0.378 | -2.647 CXYorf1-related protein (MGC52000), mRNA.                                                                          |
| sec8l1    | 0.378 | -2.648 SEC8-like 1 (S. cerevisiae) (SEC8L1), mRNA.                                                                        |
| c5orf14   | 0.378 | -2.648 chromosome 5 open reading frame 14 (C5orf14), mRNA.                                                                |
| loc648000 | 0.378 | -2.648 PREDICTED: similar to 60S ribosomal protein L7, transcript variant 1 (LOC648000), mRNA.                            |
| bclaf1    | 0.377 | -2.65 BCL2-associated transcription factor 1 (BCLAF1), transcript variant 1, mRNA.                                        |
| ttc17     | 0.377 | -2.65 tetratricopeptide repeat domain 17 (TTC17), mRNA.                                                                   |
| loc653377 | 0.377 | -2.652 PREDICTED: similar to family with sequence similarity 36, member A (LOC653377), mRNA.                              |
| emr1      | 0.377 | -2.652 egf-like module containing, mucin-like, hormone receptor-like 1 (EMR1), mRNA.                                      |
| pigf      | 0.377 | -2.652 phosphatidylinositol glycan, class F (PIGF), transcript variant 2, mRNA.                                           |

|           |       |        |                                                                                                                               |
|-----------|-------|--------|-------------------------------------------------------------------------------------------------------------------------------|
| dscr2     | 0.377 | -2.652 | Down syndrome critical region gene 2 (DSCR2), transcript variant 1, mRNA.                                                     |
| ttc14     | 0.377 | -2.653 | tetratricopeptide repeat domain 14 (TTC14), mRNA.                                                                             |
| dnpep     | 0.377 | -2.653 | aspartyl aminopeptidase (DNPEP), mRNA.                                                                                        |
| hnrdp     | 0.377 | -2.653 | heterogeneous nuclear ribonucleoprotein D (AU-rich element RNA binding protein 1, 37kDa) (HNRPD), transcript variant 2, mRNA. |
| aadacl1   | 0.377 | -2.653 | arylacetamide deacetylase-like 1 (AADACL1), mRNA.                                                                             |
| anxa2p1   | 0.377 | -2.654 | annexin A2 pseudogene 1 (ANXA2P1) on chromosome 4.                                                                            |
| cmpk      | 0.377 | -2.654 | cytidylate kinase (CMPK), mRNA.                                                                                               |
| npc2      | 0.377 | -2.654 | Niemann-Pick disease, type C2 (NPC2), mRNA.                                                                                   |
| dctd      | 0.377 | -2.655 | dCMP deaminase (DCTD), transcript variant 2, mRNA.                                                                            |
| c9orf30   | 0.377 | -2.655 | chromosome 9 open reading frame 30 (C9orf30), mRNA.                                                                           |
| snupn     | 0.377 | -2.655 | snurportin 1 (SNUPN), transcript variant 2, mRNA.                                                                             |
| nola2     | 0.377 | -2.655 | nucleolar protein family A, member 2 (H/ACA small nucleolar RNPs) (NOLA2), transcript variant 2, mRNA.                        |
| dgkd      | 0.377 | -2.655 | diacylglycerol kinase, delta 130kDa (DGKD), transcript variant 1, mRNA.                                                       |
| ccdc22    | 0.377 | -2.655 | coiled-coil domain containing 22 (CCDC22), mRNA.                                                                              |
| mrpl19    | 0.377 | -2.656 | mitochondrial ribosomal protein L19 (MRPL19), nuclear gene encoding mitochondrial protein, mRNA.                              |
| tmub2     | 0.377 | -2.656 | transmembrane and ubiquitin-like domain containing 2 (TMUB2), transcript variant 1, mRNA.                                     |
| cdv3      | 0.376 | -2.656 | CDV3 homolog (mouse) (CDV3), mRNA. XM_945284 XM_945286 XM_945287                                                              |
| klf9      | 0.376 | -2.658 | Kruppel-like factor 9 (KLF9), mRNA.                                                                                           |
| pnkd      | 0.376 | -2.658 | paroxysmal nonkinesinogenic dyskinesia (PNKD), transcript variant 1, mRNA.                                                    |
| xpo5      | 0.376 | -2.658 | exportin 5 (XPO5), mRNA.                                                                                                      |
| akap12    | 0.376 | -2.659 | A kinase (PRKA) anchor protein (gravin) 12 (AKAP12), transcript variant 1, mRNA.                                              |
| rpa2      | 0.376 | -2.659 | replication protein A2, 32kDa (RPA2), mRNA.                                                                                   |
| thrap5    | 0.376 | -2.659 | mediator complex subunit 16 (MED16), mRNA.                                                                                    |
| lman2l    | 0.376 | -2.659 | lectin, mannose-binding 2-like (LMAN2L), mRNA.                                                                                |
| rnf130    | 0.376 | -2.659 | ring finger protein 130 (RNF130), mRNA.                                                                                       |
| hs.554410 | 0.376 | -2.66  | cDNA FLJ43451 fis, clone OCBBF2033413                                                                                         |
| c5orf13   | 0.376 | -2.66  | chromosome 5 open reading frame 13 (C5orf13), mRNA.                                                                           |
| ctsz      | 0.376 | -2.66  | cathepsin Z (CTSZ), mRNA.                                                                                                     |
| xpo6      | 0.376 | -2.661 | exportin 6 (XPO6), mRNA.                                                                                                      |
| loc205251 | 0.376 | -2.662 | hypothetical protein LOC205251 (LOC205251), mRNA.                                                                             |
| mvp       | 0.375 | -2.663 | major vault protein (MVP), transcript variant 2, mRNA.                                                                        |
| tp53i3    | 0.375 | -2.664 | tumor protein p53 inducible protein 3 (TP53I3), transcript variant 1, mRNA.                                                   |
| sms       | 0.375 | -2.665 | spermine synthase (SMS), mRNA.                                                                                                |
| serpinb7  | 0.375 | -2.665 | serpin peptidase inhibitor, clade B (ovalbumin), member 7 (SERPINB7), mRNA.                                                   |
| mgst2     | 0.375 | -2.665 | microsomal glutathione S-transferase 2 (MGST2), mRNA.                                                                         |
| heg1      | 0.375 | -2.666 | PREDICTED: HEG homolog 1 (zebrafish) (HEG1), mRNA.                                                                            |
| fam79a    | 0.375 | -2.666 | family with sequence similarity 79, member A (FAM79A), mRNA.                                                                  |
| trim28    | 0.375 | -2.667 | tripartite motif-containing 28 (TRIM28), mRNA.                                                                                |
| agtrap    | 0.375 | -2.667 | angiotensin II receptor-associated protein (AGTRAP), transcript variant 2, mRNA.                                              |
| creld2    | 0.375 | -2.668 | cysteine-rich with EGF-like domains 2 (CRELD2), mRNA.                                                                         |
| arl8b     | 0.375 | -2.668 | ADP-ribosylation factor-like 8B (ARL8B), mRNA.                                                                                |
| c6orf166  | 0.375 | -2.668 | chromosome 6 open reading frame 166 (C6orf166), mRNA.                                                                         |

|           |       |        |                                                                                                                                         |
|-----------|-------|--------|-----------------------------------------------------------------------------------------------------------------------------------------|
| tp53i13   | 0.375 | -2.668 | tumor protein p53 inducible protein 13 (TP53I13), mRNA.                                                                                 |
| dhrs7b    | 0.374 | -2.671 | dehydrogenase/reductase (SDR family) member 7B (DHR57B), mRNA.                                                                          |
| srpx      | 0.374 | -2.671 | sushi-repeat-containing protein, X-linked (SRPX), mRNA.                                                                                 |
| aco2      | 0.374 | -2.671 | aconitase 2, mitochondrial (ACO2), nuclear gene encoding mitochondrial protein, mRNA.                                                   |
| pnma1     | 0.374 | -2.671 | paraneoplastic antigen MA1 (PNMA1), mRNA.                                                                                               |
| hmmr      | 0.374 | -2.671 | hyaluronan-mediated motility receptor (RHAMM) (HMMR), transcript variant 2, mRNA.                                                       |
| m6prbp1   | 0.374 | -2.671 | mannose-6-phosphate receptor binding protein 1 (M6PRBP1), mRNA.                                                                         |
| loc401233 | 0.374 | -2.672 | similar to HIV TAT specific factor 1; cofactor required for Tat activation of HIV-1 transcription (LOC401233), mRNA.                    |
| ppp4r1    | 0.374 | -2.673 | protein phosphatase 4, regulatory subunit 1 (PPP4R1), mRNA.                                                                             |
| msn       | 0.374 | -2.674 | moesin (MSN), mRNA.                                                                                                                     |
| ilf3      | 0.374 | -2.674 | interleukin enhancer binding factor 3, 90kDa (ILF3), transcript variant 2, mRNA.                                                        |
| kiaa0746  | 0.374 | -2.675 | KIAA0746 protein (KIAA0746), mRNA.                                                                                                      |
| utp14a    | 0.374 | -2.676 | UTP14, U3 small nucleolar ribonucleoprotein, homolog A (yeast) (UTP14A), mRNA.                                                          |
| mtx2      | 0.374 | -2.676 | metaxin 2 (MTX2), transcript variant 2, mRNA.                                                                                           |
| dmtf1     | 0.374 | -2.677 | cyclin D binding myb-like transcription factor 1 (DMTF1), mRNA.                                                                         |
| mad1l1    | 0.374 | -2.677 | MAD1 mitotic arrest deficient-like 1 (yeast) (MAD1L1), transcript variant 2, mRNA.                                                      |
| c10orf11  | 0.374 | -2.677 | chromosome 10 open reading frame 11 (C10orf11), mRNA.                                                                                   |
| coch      | 0.373 | -2.678 | coagulation factor C homolog, cochlin (Limulus polyphemus) (COCH), mRNA.                                                                |
| slc16a3   | 0.373 | -2.678 | solute carrier family 16, member 3 (monocarboxylic acid transporter 4) (SLC16A3), transcript variant 2, mRNA.                           |
| kif11     | 0.373 | -2.678 | kinesin family member 11 (KIF11), mRNA.                                                                                                 |
| cps1      | 0.373 | -2.679 | carbamoyl-phosphate synthetase 1, mitochondrial (CPS1), mRNA.                                                                           |
| recql4    | 0.373 | -2.679 | RecQ protein-like 4 (RECQL4), mRNA.                                                                                                     |
| gsto2     | 0.373 | -2.68  | glutathione S-transferase omega 2 (GSTO2), mRNA.                                                                                        |
| col12a1   | 0.373 | -2.68  | collagen, type XII, alpha 1 (COL12A1), transcript variant long, mRNA.                                                                   |
| mcf2      | 0.373 | -2.681 | multiple coagulation factor deficiency 2 (MCFD2), mRNA.                                                                                 |
| sdhc      | 0.373 | -2.681 | succinate dehydrogenase complex, subunit C, integral membrane protein, 15kDa (SDHC), nuclear gene encoding mitochondrial protein, mRNA. |
| flj14154  | 0.373 | -2.682 | hypothetical protein FLJ14154 (FLJ14154), mRNA.                                                                                         |
| stk35     | 0.373 | -2.682 | serine/threonine kinase 35 (STK35), mRNA.                                                                                               |
| rcn1      | 0.373 | -2.682 | reticulocalbin 1, EF-hand calcium binding domain (RCN1), mRNA.                                                                          |
| znf518    | 0.373 | -2.682 | zinc finger protein 518 (ZNF518), mRNA.                                                                                                 |
| sdpr      | 0.373 | -2.682 | serum deprivation response (phosphatidylserine binding protein) (SDPR), mRNA.                                                           |
| kbtbd2    | 0.373 | -2.683 | kelch repeat and BTB (POZ) domain containing 2 (KBTBD2), mRNA.                                                                          |
| itga5     | 0.373 | -2.683 | integrin, alpha 5 (fibronectin receptor, alpha polypeptide) (ITGA5), mRNA.                                                              |
| chpt1     | 0.373 | -2.683 | choline phosphotransferase 1 (CHPT1), mRNA.                                                                                             |
| bfar      | 0.373 | -2.684 | bifunctional apoptosis regulator (BFAR), mRNA.                                                                                          |
| loc440093 | 0.373 | -2.684 | similar to H3 histone, family 3B (LOC440093), mRNA.                                                                                     |
| kiaa0310  | 0.372 | -2.685 | KIAA0310 (KIAA0310), mRNA.                                                                                                              |
| ormdl1    | 0.372 | -2.685 | ORM1-like 1 (S. cerevisiae) (ORMDL1), mRNA.                                                                                             |
| hs.125395 | 0.372 | -2.685 | BX110351 NCI_CGAP_Kid5 cDNA clone IMAGp998C243778, mRNA sequence                                                                        |
| tfpt      | 0.372 | -2.686 | TCF3 (E2A) fusion partner (in childhood Leukemia) (TFPT), mRNA.                                                                         |
| hsp90aa1  | 0.372 | -2.687 | heat shock protein 90kDa alpha (cytosolic), class A member 1 (HSP90AA1), transcript variant 2, mRNA.                                    |

|           |       |        |                                                                                                               |
|-----------|-------|--------|---------------------------------------------------------------------------------------------------------------|
| mrps28    | 0.372 | -2.687 | mitochondrial ribosomal protein S28 (MRPS28), nuclear gene encoding mitochondrial protein, mRNA.              |
| ahcy1     | 0.372 | -2.687 | S-adenosylhomocysteine hydrolase-like 1 (AHCYL1), mRNA.                                                       |
| chchd3    | 0.372 | -2.688 | coiled-coil-helix-coiled-coil-helix domain containing 3 (CHCHD3), mRNA.                                       |
| sec31l1   | 0.372 | -2.689 | SEC31 homolog A ( <i>S. cerevisiae</i> ) (SEC31A), transcript variant 1, mRNA.                                |
| usp34     | 0.372 | -2.69  | ubiquitin specific peptidase 34 (USP34), mRNA.                                                                |
| cdc25a    | 0.372 | -2.69  | cell division cycle 25A (CDC25A), transcript variant 1, mRNA.                                                 |
| b3galt6   | 0.372 | -2.691 | UDP-Gal:betaGal beta 1,3-galactosyltransferase polypeptide 6 (B3GALT6), mRNA.                                 |
| fam120a   | 0.371 | -2.692 | family with sequence similarity 120A (FAM120A), mRNA.                                                         |
| psmd2     | 0.371 | -2.693 | proteasome (prosome, macropain) 26S subunit, non-ATPase, 2 (PSMD2), mRNA.                                     |
| nlgn2     | 0.371 | -2.693 | neuroligin 2 (NLGN2), mRNA.                                                                                   |
| itgb5     | 0.371 | -2.693 | PREDICTED: integrin, beta 5, transcript variant 3 (ITGB5), mRNA.                                              |
| frag1     | 0.371 | -2.693 | FGF receptor activating protein 1 (FRAG1), mRNA.                                                              |
| ugdh      | 0.371 | -2.693 | UDP-glucose dehydrogenase (UGDH), mRNA.                                                                       |
| nat9      | 0.371 | -2.693 | N-acetyltransferase 9 (NAT9), mRNA.                                                                           |
| zscan5    | 0.371 | -2.694 | zinc finger and SCAN domain containing 5 (ZSCAN5), mRNA.                                                      |
| serinc1   | 0.371 | -2.694 | serine incorporator 1 (SERINC1), mRNA.                                                                        |
| usp11     | 0.371 | -2.695 | ubiquitin specific peptidase 11 (USP11), mRNA.                                                                |
| loc643287 | 0.371 | -2.695 | PREDICTED: similar to prothymosin, alpha (gene sequence 28), transcript variant 1 (LOC643287), mRNA.          |
| c19orf2   | 0.371 | -2.695 | chromosome 19 open reading frame 2 (C19orf2), transcript variant 2, mRNA.                                     |
| fam111a   | 0.371 | -2.696 | family with sequence similarity 111, member A (FAM111A), transcript variant 1, mRNA.                          |
| asb8      | 0.371 | -2.696 | ankyrin repeat and SOCS box-containing 8 (ASB8), mRNA.                                                        |
| phb2      | 0.371 | -2.697 | prohibitin 2 (PHB2), mRNA.                                                                                    |
| prmt5     | 0.371 | -2.697 | protein arginine methyltransferase 5 (PRMT5), mRNA.                                                           |
| nubpl     | 0.371 | -2.697 | nucleotide binding protein-like (NUBPL), mRNA.                                                                |
| denr      | 0.371 | -2.698 | density-regulated protein (DENR), mRNA.                                                                       |
| palld     | 0.371 | -2.698 | palladin, cytoskeletal associated protein (PALLD), mRNA.                                                      |
| trim26    | 0.37  | -2.7   | tripartite motif-containing 26 (TRIM26), mRNA.                                                                |
| c19orf10  | 0.37  | -2.7   | chromosome 19 open reading frame 10 (C19orf10), mRNA.                                                         |
| nfia      | 0.37  | -2.7   | nuclear factor I/A (NFIA), mRNA.                                                                              |
| znf219    | 0.37  | -2.701 | zinc finger protein 219 (ZNF219), mRNA.                                                                       |
| mfsd1     | 0.37  | -2.702 | major facilitator superfamily domain containing 1 (MFSD1), mRNA.                                              |
| lgp1      | 0.37  | -2.702 | homolog of mouse LGP1 (LGP1), mRNA.                                                                           |
| vamp3     | 0.37  | -2.702 | vesicle-associated membrane protein 3 (cellubrevin) (VAMP3), mRNA.                                            |
| mesp1     | 0.37  | -2.702 | mesoderm posterior 1 homolog (mouse) (MESP1), mRNA.                                                           |
| nrcam     | 0.37  | -2.703 | neuronal cell adhesion molecule (NRCAM), mRNA.                                                                |
| ltbr      | 0.37  | -2.703 | lymphotoxin beta receptor (TNFR superfamily, member 3) (LTBR), mRNA.                                          |
| psmd14    | 0.37  | -2.703 | proteasome (prosome, macropain) 26S subunit, non-ATPase, 14 (PSMD14), mRNA.                                   |
| fads1     | 0.37  | -2.704 | fatty acid desaturase 1 (FADS1), mRNA.                                                                        |
| ubqln2    | 0.37  | -2.705 | ubiquilin 2 (UBQLN2), mRNA.                                                                                   |
| kiaa1600  | 0.37  | -2.705 | KIAA1600 (KIAA1600), mRNA.                                                                                    |
| c10orf57  | 0.37  | -2.705 | chromosome 10 open reading frame 57 (C10orf57), mRNA.                                                         |
| plekha9   | 0.37  | -2.706 | pleckstrin homology domain containing, family A (phosphoinositide binding specific) member 9 (PLEKHA9), mRNA. |

|           |       |                                                                                                                                                                                 |
|-----------|-------|---------------------------------------------------------------------------------------------------------------------------------------------------------------------------------|
| paf1      | 0.37  | -2.706 Paf1, RNA polymerase II associated factor, homolog ( <i>S. cerevisiae</i> ) (PAF1), mRNA.                                                                                |
| sh3bp4    | 0.37  | -2.706 SH3-domain binding protein 4 (SH3BP4), mRNA.                                                                                                                             |
| polr2a    | 0.369 | -2.707 polymerase (RNA) II (DNA directed) polypeptide A, 220kDa (POLR2A), mRNA.                                                                                                 |
| wipi1     | 0.369 | -2.707 WD repeat domain, phosphoinositide interacting 1 (WIP1), mRNA.                                                                                                           |
| plek2     | 0.369 | -2.707 pleckstrin 2 (PLEK2), mRNA.                                                                                                                                              |
| rps6ka5   | 0.369 | -2.707 ribosomal protein S6 kinase, 90kDa, polypeptide 5 (RPS6KA5), transcript variant 2, mRNA.                                                                                 |
| mtcp1     | 0.369 | -2.707 mature T-cell proliferation 1 (MTCP1), nuclear gene encoding mitochondrial protein, transcript variant B1, mRNA.                                                         |
| calm3     | 0.369 | -2.707 calmodulin 3 (phosphorylase kinase, delta) (CALM3), mRNA.                                                                                                                |
| slc5a6    | 0.369 | -2.709 solute carrier family 5 (sodium-dependent vitamin transporter), member 6 (SLC5A6), mRNA.                                                                                 |
| rfc4      | 0.369 | -2.71 replication factor C (activator 1) 4, 37kDa (RFC4), transcript variant 1, mRNA.                                                                                           |
| thoc1     | 0.369 | -2.71 THO complex 1 (THOC1), mRNA.                                                                                                                                              |
| lrrc41    | 0.369 | -2.71 leucine rich repeat containing 41 (LRRC41), mRNA.                                                                                                                         |
| gpkow     | 0.369 | -2.711 G patch domain and KOW motifs (GPKOW), mRNA.                                                                                                                             |
| fscn1     | 0.369 | -2.711 fascin homolog 1, actin-bundling protein ( <i>Strongylocentrotus purpuratus</i> ) (FSCN1), mRNA.                                                                         |
| loc650029 | 0.369 | -2.712 PREDICTED: similar to RNA-binding protein 4 (RNA-binding motif protein 4) (Lark homolog) (Hlark) (RNA-binding motif protein 4a), transcript variant 2 (LOC650029), mRNA. |
| yipf4     | 0.369 | -2.712 Yip1 domain family, member 4 (YIPF4), mRNA.                                                                                                                              |
| 6-Mar     | 0.369 | -2.713 membrane-associated ring finger (C3HC4) 6 (MARCH6), mRNA.                                                                                                                |
| cyb5r1    | 0.369 | -2.713 cytochrome b5 reductase 1 (CYB5R1), mRNA.                                                                                                                                |
| slc7a6    | 0.368 | -2.715 solute carrier family 7 (cationic amino acid transporter, y+ system), member 6 (SLC7A6), transcript variant 2, mRNA.                                                     |
| aldh3a2   | 0.368 | -2.715 aldehyde dehydrogenase 3 family, member A2 (ALDH3A2), transcript variant 1, mRNA.                                                                                        |
| mt1f      | 0.368 | -2.716 metallothionein 1F (MT1F), mRNA.                                                                                                                                         |
| nagk      | 0.368 | -2.717 N-acetylglucosamine kinase (NAGK), mRNA.                                                                                                                                 |
| asb1      | 0.368 | -2.718 ankyrin repeat and SOCS box-containing 1 (ASB1), mRNA.                                                                                                                   |
| gm2a      | 0.368 | -2.718 GM2 ganglioside activator (GM2A), mRNA.                                                                                                                                  |
| slc35c2   | 0.368 | -2.718 solute carrier family 35, member C2 (SLC35C2), transcript variant 1, mRNA.                                                                                               |
| tmem106c  | 0.368 | -2.719 transmembrane protein 106C (TMEM106C), mRNA.                                                                                                                             |
| adnp      | 0.368 | -2.721 activity-dependent neuroprotector homeobox (ADNP), transcript variant 1, mRNA.                                                                                           |
| mpdz      | 0.367 | -2.721 multiple PDZ domain protein (MPDZ), mRNA.                                                                                                                                |
| cnfn      | 0.367 | -2.722 cornifelin (CNFN), mRNA.                                                                                                                                                 |
| gyg2      | 0.367 | -2.722 glycogenin 2 (GYG2), mRNA.                                                                                                                                               |
| tfb2m     | 0.367 | -2.723 transcription factor B2, mitochondrial (TFB2M), mRNA.                                                                                                                    |
| nkx3-1    | 0.367 | -2.723 NK3 homeobox 1 (NKX3-1), mRNA.                                                                                                                                           |
| yipf1     | 0.367 | -2.724 Yip1 domain family, member 1 (YIPF1), mRNA.                                                                                                                              |
| pcgf4     | 0.367 | -2.724 BMI1 polycomb ring finger oncogene (BMI1), mRNA.                                                                                                                         |
| dnm1      | 0.367 | -2.725 dynamin 1 (DNM1), transcript variant 1, mRNA.                                                                                                                            |
| cog4      | 0.367 | -2.726 component of oligomeric golgi complex 4 (COG4), mRNA.                                                                                                                    |
| cbx5      | 0.367 | -2.726 chromobox homolog 5 (HP1 alpha homolog, <i>Drosophila</i> ) (CBX5), mRNA.                                                                                                |
| mrps17    | 0.367 | -2.726 mitochondrial ribosomal protein S17 (MRPS17), nuclear gene encoding mitochondrial protein, mRNA.                                                                         |
| sec61b    | 0.367 | -2.727 Sec61 beta subunit (SEC61B), mRNA.                                                                                                                                       |
| preb      | 0.367 | -2.728 prolactin regulatory element binding (PREB), mRNA.                                                                                                                       |
| rps28     | 0.367 | -2.728 ribosomal protein S28 (RPS28), mRNA.                                                                                                                                     |

|           |       |                                                                                                                                      |
|-----------|-------|--------------------------------------------------------------------------------------------------------------------------------------|
| mxd4      | 0.367 | -2.728 MAX dimerization protein 4 (MXD4), mRNA.                                                                                      |
| kiaa0690  | 0.367 | -2.729 ribosomal RNA processing 12 homolog ( <i>S. cerevisiae</i> ) (RRP12), mRNA.                                                   |
| eif4ebp1  | 0.366 | -2.729 eukaryotic translation initiation factor 4E binding protein 1 (EIF4EBP1), mRNA.                                               |
| g1p3      | 0.366 | -2.729 interferon, alpha-inducible protein (clone IFI-6-16) (G1P3), transcript variant 1, mRNA.                                      |
| baiap2    | 0.366 | -2.732 BAI1-associated protein 2 (BAIAP2), transcript variant 2, mRNA.                                                               |
| adamts9   | 0.366 | -2.732 ADAM metalloproteinase with thrombospondin type 1 motif, 9 (ADAMTS9), mRNA.                                                   |
| loc652226 | 0.366 | -2.733 PREDICTED: hypothetical protein LOC652226 (LOC652226), mRNA.                                                                  |
| litaf     | 0.366 | -2.735 lipopolysaccharide-induced TNF factor (LITAF), mRNA.                                                                          |
| alg5      | 0.365 | -2.737 asparagine-linked glycosylation 5 homolog ( <i>S. cerevisiae</i> , dolichyl-phosphate beta-glucosyltransferase) (ALG5), mRNA. |
| nts       | 0.365 | -2.738 neurotensin (NTS), mRNA.                                                                                                      |
| ptrh2     | 0.365 | -2.739 peptidyl-tRNA hydrolase 2 (PTRH2), nuclear gene encoding mitochondrial protein, transcript variant 1, mRNA.                   |
| itpk1     | 0.365 | -2.739 inositol 1,3,4-triphosphate 5/6 kinase (ITPK1), mRNA.                                                                         |
| c12orf57  | 0.365 | -2.74 chromosome 12 open reading frame 57 (C12orf57), mRNA.                                                                          |
| hscarg    | 0.365 | -2.742 NmrA-like family domain containing 1 (NMRAL1), mRNA.                                                                          |
| gddr      | 0.365 | -2.742 gastrokine 2 (GKN2), mRNA.                                                                                                    |
| abce1     | 0.365 | -2.743 ATP-binding cassette, sub-family E (OABP), member 1 (ABCE1), mRNA.                                                            |
| pcf11     | 0.365 | -2.743 PCF11, cleavage and polyadenylation factor subunit, homolog ( <i>S. cerevisiae</i> ) (PCF11), mRNA.                           |
| hs.193557 | 0.365 | -2.743 cDNA FLJ32401 fis, clone SKMUS2000339                                                                                         |
| rad21     | 0.364 | -2.744 RAD21 homolog ( <i>S. pombe</i> ) (RAD21), mRNA.                                                                              |
| slc30a1   | 0.364 | -2.744 solute carrier family 30 (zinc transporter), member 1 (SLC30A1), mRNA.                                                        |
| elovl1    | 0.364 | -2.744 elongation of very long chain fatty acids (FEN1/Elo2, SUR4/Elo3, yeast)-like 1 (ELOVL1), mRNA.                                |
| mrpl15    | 0.364 | -2.746 mitochondrial ribosomal protein L15 (MRPL15), nuclear gene encoding mitochondrial protein, mRNA.                              |
| eml4      | 0.364 | -2.746 echinoderm microtubule associated protein like 4 (EML4), mRNA.                                                                |
| ehd4      | 0.364 | -2.746 EH-domain containing 4 (EHD4), mRNA.                                                                                          |
| uqcrc1    | 0.364 | -2.747 ubiquinol-cytochrome c reductase core protein I (UQCRC1), mRNA.                                                               |
| mte       | 0.364 | -2.747 metallothionein E (MTE), mRNA.                                                                                                |
| psmb1     | 0.364 | -2.747 proteasome (prosome, macropain) subunit, beta type, 1 (PSMB1), mRNA.                                                          |
| frmd6     | 0.364 | -2.747 FERM domain containing 6 (FRMD6), mRNA.                                                                                       |
| gpr175    | 0.364 | -2.748 G protein-coupled receptor 175 (GPR175), mRNA.                                                                                |
| ets2      | 0.364 | -2.749 v-ets erythroblastosis virus E26 oncogene homolog 2 (avian) (ETS2), mRNA.                                                     |
| eif4g1    | 0.364 | -2.749 eukaryotic translation initiation factor 4 gamma, 1 (EIF4G1), transcript variant 5, mRNA.                                     |
| fam92a1   | 0.364 | -2.75 PREDICTED: family with sequence similarity 92, member A1, transcript variant 3 (FAM92A1), mRNA.                                |
| nme4      | 0.364 | -2.75 non-metastatic cells 4, protein expressed in (NME4), mRNA.                                                                     |
| ipo13     | 0.364 | -2.751 importin 13 (IPO13), mRNA.                                                                                                    |
| ccng1     | 0.364 | -2.751 cyclin G1 (CCNG1), transcript variant 2, mRNA.                                                                                |
| c9orf3    | 0.363 | -2.751 chromosome 9 open reading frame 3 (C9orf3), mRNA.                                                                             |
| vti1b     | 0.363 | -2.752 vesicle transport through interaction with t-SNAREs homolog 1B (yeast) (VTI1B), mRNA.                                         |
| parn      | 0.363 | -2.752 poly(A)-specific ribonuclease (deadenylation nuclease) (PARN), mRNA.                                                          |
| edg3      | 0.363 | -2.752 endothelial differentiation, sphingolipid G-protein-coupled receptor, 3 (EDG3), mRNA.                                         |
| ccdc55    | 0.363 | -2.753 coiled-coil domain containing 55 (CCDC55), transcript variant 1, mRNA.                                                        |
| hspb1     | 0.363 | -2.753 heat shock 27kDa protein 1 (HSPB1), mRNA.                                                                                     |
| flj25801  | 0.363 | -2.753 hypothetical protein FLJ25801 (FLJ25801), mRNA.                                                                               |

|           |       |                                                                                                                                         |
|-----------|-------|-----------------------------------------------------------------------------------------------------------------------------------------|
| eif3s12   | 0.363 | -2.754 eukaryotic translation initiation factor 3, subunit 12 (EIF3S12), mRNA.                                                          |
| rtn4      | 0.363 | -2.755 reticulon 4 (RTN4), transcript variant 3, mRNA.                                                                                  |
| dnttip1   | 0.363 | -2.755 deoxynucleotidyltransferase, terminal, interacting protein 1 (DNTTIP1), mRNA.                                                    |
| dock10    | 0.363 | -2.755 dedicator of cytokinesis 10 (DOCK10), mRNA.                                                                                      |
| zbtb9     | 0.363 | -2.756 zinc finger and BTB domain containing 9 (ZBTB9), mRNA.                                                                           |
| neo1      | 0.363 | -2.757 neogenin homolog 1 (chicken) (NEO1), mRNA.                                                                                       |
| sil1      | 0.363 | -2.757 SIL1 homolog, endoplasmic reticulum chaperone ( <i>S. cerevisiae</i> ) (SIL1), mRNA.                                             |
| loc219854 | 0.363 | -2.757 PREDICTED: hypothetical protein LOC219854, transcript variant 11 (LOC219854), mRNA.                                              |
| cep27     | 0.363 | -2.758 centrosomal protein 27kDa (CEP27), mRNA.                                                                                         |
| fastk     | 0.362 | -2.76 Fas-activated serine/threonine kinase (FASTK), transcript variant 1, mRNA.                                                        |
| nucks1    | 0.362 | -2.76 nuclear casein kinase and cyclin-dependent kinase substrate 1 (NUCKS1), mRNA.                                                     |
| acacb     | 0.362 | -2.76 acetyl-Coenzyme A carboxylase beta (ACACB), mRNA.                                                                                 |
| npas2     | 0.362 | -2.761 neuronal PAS domain protein 2 (NPAS2), mRNA.                                                                                     |
| eral1     | 0.362 | -2.761 Era G-protein-like 1 ( <i>E. coli</i> ) (ERAL1), mRNA.                                                                           |
| fam101b   | 0.362 | -2.761 family with sequence similarity 101, member B (FAM101B), mRNA.                                                                   |
| pop4      | 0.362 | -2.762 processing of precursor 4, ribonuclease P/MRP subunit ( <i>S. cerevisiae</i> ) (POP4), mRNA.                                     |
| ugcg      | 0.362 | -2.763 UDP-glucose ceramide glucosyltransferase (UGCG), mRNA.                                                                           |
| prpf31    | 0.362 | -2.763 PRP31 pre-mRNA processing factor 31 homolog ( <i>S. cerevisiae</i> ) (PRPF31), mRNA.                                             |
| trip12    | 0.362 | -2.763 thyroid hormone receptor interactor 12 (TRIP12), mRNA.                                                                           |
| sdhd      | 0.362 | -2.765 succinate dehydrogenase complex, subunit D, integral membrane protein (SDHD), nuclear gene encoding mitochondrial protein, mRNA. |
| sedlp     | 0.362 | -2.766 spondyloepiphyseal dysplasia, late, pseudogene (SEDLP) on chromosome 19.                                                         |
| secisbp2  | 0.361 | -2.767 SECIS binding protein 2 (SECISBP2), mRNA.                                                                                        |
| loc642236 | 0.361 | -2.767 PREDICTED: similar to FRG1 protein (FSHD region gene 1 protein), transcript variant 8 (LOC642236), mRNA.                         |
| srxn1     | 0.361 | -2.768 sulfiredoxin 1 homolog ( <i>S. cerevisiae</i> ) (SRXN1), mRNA.                                                                   |
| hs.368255 | 0.361 | -2.768 PREDICTED: KIAA0368 (KIAA0368), mRNA                                                                                             |
| mrpl2     | 0.361 | -2.769 mitochondrial ribosomal protein L2 (MRPL2), nuclear gene encoding mitochondrial protein, mRNA.                                   |
| mlh1      | 0.361 | -2.77 mutL homolog 1, colon cancer, nonpolyposis type 2 ( <i>E. coli</i> ) (MLH1), mRNA.                                                |
| khdrbs1   | 0.361 | -2.77 KH domain containing, RNA binding, signal transduction associated 1 (KHDRBS1), mRNA.                                              |
| mgc23909  | 0.361 | -2.77 hypothetical protein MGC23909 (MGC23909), mRNA.                                                                                   |
| fgb       | 0.361 | -2.771 fibrinogen beta chain (FGB), mRNA.                                                                                               |
| hs.555252 | 0.361 | -2.771 DA371742 BRTHA2 cDNA clone BRTHA2001741 5, mRNA sequence                                                                         |
| eif3s6ip  | 0.361 | -2.772 eukaryotic translation initiation factor 3, subunit E interacting protein (EIF3EIP), mRNA.                                       |
| sdf4      | 0.361 | -2.772 stromal cell derived factor 4 (SDF4), mRNA.                                                                                      |
| c4orf34   | 0.361 | -2.773 chromosome 4 open reading frame 34 (C4orf34), mRNA.                                                                              |
| tpm2      | 0.361 | -2.774 tropomyosin 2 (beta) (TPM2), transcript variant 1, mRNA.                                                                         |
| srrm2     | 0.36  | -2.775 serine/arginine repetitive matrix 2 (SRRM2), mRNA.                                                                               |
| c10orf32  | 0.36  | -2.775 chromosome 10 open reading frame 32 (C10orf32), mRNA.                                                                            |
| lsm10     | 0.36  | -2.775 LSM10, U7 small nuclear RNA associated (LSM10), mRNA.                                                                            |
| csf2ra    | 0.36  | -2.776 colony stimulating factor 2 receptor, alpha, low-affinity (granulocyte-macrophage) (CSF2RA), transcript variant 6, mRNA.         |
| mtmr4     | 0.36  | -2.777 myotubularin related protein 4 (MTMR4), mRNA.                                                                                    |
| nt5c2     | 0.36  | -2.778 5'-nucleotidase, cytosolic II (NT5C2), mRNA.                                                                                     |



|           |       |        |                                                                                                                        |
|-----------|-------|--------|------------------------------------------------------------------------------------------------------------------------|
| loc440927 | 0.36  | -2.778 | PREDICTED: similar to 60S acidic ribosomal protein P1, transcript variant 4 (LOC440927), mRNA.                         |
| c14orf82  | 0.36  | -2.778 | PREDICTED: chromosome 14 open reading frame 82 (C14orf82), mRNA.                                                       |
| flj22662  | 0.36  | -2.778 | hypothetical protein FLJ22662 (FLJ22662), mRNA.                                                                        |
| aplp1     | 0.36  | -2.778 | amyloid beta (A4) precursor-like protein 1 (APLP1), transcript variant 2, mRNA.                                        |
| mgc24381  | 0.36  | -2.779 | chromosome 16 open reading frame 42 (C16orf42), mRNA.                                                                  |
| bambi     | 0.36  | -2.781 | BMP and activin membrane-bound inhibitor homolog ( <i>Xenopus laevis</i> ) (BAMBI), mRNA.                              |
| gba       | 0.36  | -2.781 | glucosidase, beta; acid (includes glucosylceramidase) (GBA), transcript variant 3, mRNA.                               |
| smbp      | 0.36  | -2.781 | transmembrane 9 superfamily member 3 (TM9SF3), mRNA.                                                                   |
| setmar    | 0.36  | -2.781 | SET domain and mariner transposase fusion gene (SETMAR), mRNA.                                                         |
| nab1      | 0.359 | -2.782 | NGFI-A binding protein 1 (EGR1 binding protein 1) (NAB1), mRNA.                                                        |
| cd68      | 0.359 | -2.783 | CD68 antigen (CD68), mRNA.                                                                                             |
| zzef1     | 0.359 | -2.783 | zinc finger, ZZ-type with EF-hand domain 1 (ZZEF1), mRNA.                                                              |
| jarid2    | 0.359 | -2.783 | jumonji, AT rich interactive domain 2 (JARID2), mRNA.                                                                  |
| tubb2a    | 0.359 | -2.784 | tubulin, beta 2A (TUBB2A), mRNA.                                                                                       |
| igfbp7    | 0.359 | -2.784 | insulin-like growth factor binding protein 7 (IGFBP7), mRNA.                                                           |
| cdc34     | 0.359 | -2.785 | cell division cycle 34 homolog ( <i>S. cerevisiae</i> ) (CDC34), mRNA.                                                 |
| cul4b     | 0.359 | -2.785 | cullin 4B (CUL4B), mRNA.                                                                                               |
| slc35a5   | 0.359 | -2.785 | solute carrier family 35, member A5 (SLC35A5), mRNA.                                                                   |
| magoh     | 0.359 | -2.786 | mago-nashi homolog, proliferation-associated ( <i>Drosophila</i> ) (MAGOH), mRNA.                                      |
| ctsh      | 0.359 | -2.786 | cathepsin H (CTSH), transcript variant 1, mRNA.                                                                        |
| loc647954 | 0.359 | -2.788 | PREDICTED: similar to Keratin, type II cytoskeletal 8 (Cytokeratin-8) (CK-8) (Keraton-8) (K8) (LOC647954), mRNA.       |
| cdc16     | 0.359 | -2.788 | cell division cycle 16 homolog ( <i>S. cerevisiae</i> ) (CDC16), transcript variant 2, mRNA.                           |
| tcp1      | 0.359 | -2.789 | t-complex 1 (TCP1), transcript variant 1, mRNA.                                                                        |
| obfc2a    | 0.359 | -2.789 | oligonucleotide/oligosaccharide-binding fold containing 2A (OBFC2A), transcript variant 2, mRNA.                       |
| tra16     | 0.359 | -2.789 | TR4 orphan receptor associated protein TRA16 (TRA16), mRNA.                                                            |
| ctsl1     | 0.358 | -2.79  | cathepsin L1 (CTSL1), transcript variant 2, mRNA.                                                                      |
| flvcr     | 0.358 | -2.79  | feline leukemia virus subgroup C cellular receptor 1 (FLVCR1), mRNA.                                                   |
| rnf103    | 0.358 | -2.791 | ring finger protein 103 (RNF103), mRNA.                                                                                |
| hs.14555  | 0.358 | -2.791 | cDNA: FLJ21513 fis, clone COL05778                                                                                     |
| polr2c    | 0.358 | -2.792 | polymerase (RNA) II (DNA directed) polypeptide C, 33kDa (POLR2C), transcript variant gamma, mRNA.                      |
| rps6ka4   | 0.358 | -2.792 | ribosomal protein S6 kinase, 90kDa, polypeptide 4 (RPS6KA4), transcript variant 1, mRNA.                               |
| mrps12    | 0.358 | -2.792 | mitochondrial ribosomal protein S12 (MRPS12), nuclear gene encoding mitochondrial protein, transcript variant 1, mRNA. |
| tnip1     | 0.358 | -2.794 | TNFAIP3 interacting protein 1 (TNIP1), mRNA.                                                                           |
| taf15     | 0.358 | -2.794 | TAF15 RNA polymerase II, TATA box binding protein (TBP)-associated factor, 68kDa (TAF15), transcript variant 2, mRNA.  |
| gyg1      | 0.358 | -2.794 | glycogenin 1 (GYG1), mRNA.                                                                                             |
| sumf1     | 0.358 | -2.794 | sulfatase modifying factor 1 (SUMF1), mRNA.                                                                            |
| rbm12     | 0.358 | -2.795 | RNA binding motif protein 12 (RBM12), transcript variant 1, mRNA.                                                      |
| pink1     | 0.358 | -2.796 | PTEN induced putative kinase 1 (PINK1), mRNA.                                                                          |
| aco1      | 0.357 | -2.797 | aconitase 1, soluble (ACO1), mRNA.                                                                                     |
| fads2     | 0.357 | -2.797 | fatty acid desaturase 2 (FADS2), mRNA.                                                                                 |
| flj11200  | 0.357 | -2.798 | chromosome 4 open reading frame 20 (C4orf20), mRNA.                                                                    |
| apbb1ip   | 0.357 | -2.798 | amyloid beta (A4) precursor protein-binding, family B, member 1 interacting protein (APBB1IP), mRNA.                   |

|           |       |                                                                                                                                                                         |
|-----------|-------|-------------------------------------------------------------------------------------------------------------------------------------------------------------------------|
| klf2      | 0.357 | -2.798 Kruppel-like factor 2 (lung) (KLF2), mRNA.                                                                                                                       |
| dpp8      | 0.357 | -2.799 dipeptidyl-peptidase 8 (DPP8), transcript variant 3, mRNA.                                                                                                       |
| g10       | 0.357 | -2.799 BUD31 homolog ( <i>S. cerevisiae</i> ) (BUD31), mRNA.                                                                                                            |
| nt5e      | 0.357 | -2.801 5'-nucleotidase, ecto (CD73) (NT5E), mRNA.                                                                                                                       |
| nrip1     | 0.357 | -2.802 nuclear receptor interacting protein 1 (NRIP1), mRNA.                                                                                                            |
| ncbp2     | 0.357 | -2.802 nuclear cap binding protein subunit 2, 20kDa (NCBP2), mRNA.                                                                                                      |
| il32      | 0.357 | -2.802 interleukin 32 (IL32), transcript variant 3, mRNA.                                                                                                               |
| prpf3     | 0.357 | -2.802 PRP3 pre-mRNA processing factor 3 homolog ( <i>S. cerevisiae</i> ) (PRPF3), mRNA.                                                                                |
| entpd4    | 0.357 | -2.802 ectonucleoside triphosphate diphosphohydrolase 4 (ENTPD4), mRNA.                                                                                                 |
| kcnf1     | 0.357 | -2.803 potassium voltage-gated channel, subfamily F, member 1 (KCNF1), mRNA.                                                                                            |
| ptprf     | 0.357 | -2.804 protein tyrosine phosphatase, receptor type, F (PTPRF), transcript variant 2, mRNA.                                                                              |
| lxn       | 0.357 | -2.804 latexin (LXN), mRNA.                                                                                                                                             |
| usp7      | 0.356 | -2.805 ubiquitin specific peptidase 7 (herpes virus-associated) (USP7), mRNA.                                                                                           |
| ard1a     | 0.356 | -2.805 ARD1 homolog A, N-acetyltransferase ( <i>S. cerevisiae</i> ) (ARD1A), mRNA.                                                                                      |
| loc653780 | 0.356 | -2.807 PREDICTED: similar to ubiquitin-conjugating enzyme E2C isoform 2 (LOC653780), mRNA.                                                                              |
| rdh5      | 0.356 | -2.808 retinol dehydrogenase 5 (11-cis/9-cis) (RDH5), mRNA.                                                                                                             |
| mrpl27    | 0.356 | -2.808 mitochondrial ribosomal protein L27 (MRPL27), nuclear gene encoding mitochondrial protein, transcript variant 2, mRNA.                                           |
| mlc1sa    | 0.356 | -2.809 myosin light chain 1 slow a (MLC1SA), mRNA.                                                                                                                      |
| synj2bp   | 0.356 | -2.81 synaptojanin 2 binding protein (SYNJ2BP), mRNA.                                                                                                                   |
| hspd1     | 0.356 | -2.81 heat shock 60kDa protein 1 (chaperonin) (HSPD1), nuclear gene encoding mitochondrial protein, transcript variant 1, mRNA.                                         |
| rab34     | 0.356 | -2.812 RAB34, member RAS oncogene family (RAB34), mRNA.                                                                                                                 |
| fam3a     | 0.355 | -2.813 family with sequence similarity 3, member A (FAM3A), mRNA.                                                                                                       |
| loc653888 | 0.355 | -2.814 PREDICTED: similar to Actin-related protein 2/3 complex subunit 1B (ARP2/3 complex 41 kDa subunit) (p41-ARC) (LOC653888), mRNA.                                  |
| xpr1      | 0.355 | -2.814 xenotropic and polytropic retrovirus receptor (XPR1), mRNA.                                                                                                      |
| c9orf119  | 0.355 | -2.815 PREDICTED: chromosome 9 open reading frame 119 (C9orf119), mRNA.                                                                                                 |
| timm23    | 0.355 | -2.815 PREDICTED: translocase of inner mitochondrial membrane 23 homolog (yeast) (TIMM23), mRNA.                                                                        |
| b2m       | 0.355 | -2.816 beta-2-microglobulin (B2M), mRNA.                                                                                                                                |
| ltb4r     | 0.355 | -2.816 leukotriene B4 receptor (LTB4R), mRNA.                                                                                                                           |
| lman2     | 0.355 | -2.816 lectin, mannose-binding 2 (LMAN2), mRNA.                                                                                                                         |
| rdh11     | 0.355 | -2.817 retinol dehydrogenase 11 (all-trans/9-cis/11-cis) (RDH11), mRNA.                                                                                                 |
| loc648113 | 0.355 | -2.817 PREDICTED: similar to M-phase phosphoprotein, mpp8, transcript variant 1 (LOC648113), mRNA.                                                                      |
| dmwd      | 0.355 | -2.818 dystrophia myotonica-containing WD repeat motif (DMWD), mRNA.                                                                                                    |
| phldb2    | 0.355 | -2.82 pleckstrin homology-like domain, family B, member 2 (PHLDB2), mRNA.                                                                                               |
| trove2    | 0.355 | -2.821 TROVE domain family, member 2 (TROVE2), transcript variant 1, mRNA.                                                                                              |
| mgc15416  | 0.354 | -2.822 chromosome 16 open reading frame 14 (C16orf14), mRNA.                                                                                                            |
| timp2     | 0.354 | -2.822 TIMP metalloproteinase inhibitor 2 (TIMP2), mRNA.                                                                                                                |
| mgc4825   | 0.354 | -2.823 apolipoprotein O (APOO), mRNA.                                                                                                                                   |
| atp5h     | 0.354 | -2.823 ATP synthase, H <sup>+</sup> transporting, mitochondrial F0 complex, subunit d (ATP5H), nuclear gene encoding mitochondrial protein, transcript variant 1, mRNA. |
| lsg1      | 0.354 | -2.823 large subunit GTPase 1 homolog ( <i>S. cerevisiae</i> ) (LSG1), mRNA.                                                                                            |
| grhpr     | 0.354 | -2.825 glyoxylate reductase/hydroxypyruvate reductase (GRHPR), mRNA.                                                                                                    |

|           |       |        |                                                                                                       |
|-----------|-------|--------|-------------------------------------------------------------------------------------------------------|
| loc644422 | 0.354 | -2.825 | PREDICTED: similar to arginine/serine-rich splicing factor 6, transcript variant 1 (LOC644422), mRNA. |
| popdc3    | 0.354 | -2.825 | popeye domain containing 3 (POPDC3), mRNA.                                                            |
| hs.5724   | 0.354 | -2.827 | mRNA; cDNA DKFZp779O0231 (from clone DKFZp779O0231)                                                   |
| armcx6    | 0.354 | -2.827 | armadillo repeat containing, X-linked 6 (ARMCX6), transcript variant 1, mRNA.                         |
| cflar     | 0.354 | -2.827 | CASP8 and FADD-like apoptosis regulator (CFLAR), mRNA.                                                |
| c6orf49   | 0.354 | -2.827 | chromosome 6 open reading frame 49 (C6orf49), mRNA.                                                   |
| tp53bp1   | 0.354 | -2.828 | tumor protein p53 binding protein 1 (TP53BP1), mRNA.                                                  |
| trit1     | 0.353 | -2.829 | tRNA isopentenyltransferase 1 (TRIT1), mRNA.                                                          |
| mgc15912  | 0.353 | -2.829 | hypothetical protein MGC15912 (MGC15912), mRNA.                                                       |
| rbm15     | 0.353 | -2.83  | RNA binding motif protein 15 (RBM15), mRNA.                                                           |
| elf3      | 0.353 | -2.833 | E74-like factor 3 (ets domain transcription factor, epithelial-specific ) (ELF3), mRNA.               |
| trim41    | 0.353 | -2.833 | tripartite motif-containing 41 (TRIM41), transcript variant 1, mRNA.                                  |
| loc648852 | 0.353 | -2.833 | PREDICTED: hypothetical protein LOC648852 (LOC648852), mRNA.                                          |
| fkbp10    | 0.353 | -2.835 | FK506 binding protein 10, 65 kDa (FKBP10), mRNA.                                                      |
| ccdc12    | 0.353 | -2.835 | coiled-coil domain containing 12 (CCDC12), mRNA.                                                      |
| c9orf19   | 0.353 | -2.836 | chromosome 9 open reading frame 19 (C9orf19), mRNA.                                                   |
| kti12     | 0.353 | -2.836 | KTI12 homolog, chromatin associated ( <i>S. cerevisiae</i> ) (KTI12), mRNA.                           |
| gnl3l     | 0.353 | -2.837 | guanine nucleotide binding protein-like 3 (nucleolar)-like (GNL3L), mRNA.                             |
| znf259    | 0.352 | -2.837 | zinc finger protein 259 (ZNF259), mRNA.                                                               |
| c1orf107  | 0.352 | -2.838 | chromosome 1 open reading frame 107 (C1orf107), mRNA.                                                 |
| nuak1     | 0.352 | -2.838 | NUAK family, SNF1-like kinase, 1 (NUAK1), mRNA.                                                       |
| glud1     | 0.352 | -2.838 | glutamate dehydrogenase 1 (GLUD1), mRNA.                                                              |
| qscn6     | 0.352 | -2.839 | quiescin Q6 sulfhydryl oxidase 1 (QSOX1), transcript variant 1, mRNA.                                 |
| casc3     | 0.352 | -2.839 | cancer susceptibility candidate 3 (CASC3), mRNA.                                                      |
| mrpl46    | 0.352 | -2.839 | mitochondrial ribosomal protein L46 (MRPL46), nuclear gene encoding mitochondrial protein, mRNA.      |
| loc152485 | 0.352 | -2.839 | hypothetical protein LOC152485 (LOC152485), mRNA.                                                     |
| ptpn11    | 0.352 | -2.839 | protein tyrosine phosphatase, non-receptor type 11 (Noonan syndrome 1) (PTPN11), mRNA.                |
| abhd12    | 0.352 | -2.84  | abhydrolase domain containing 12 (ABHD12), transcript variant 1, mRNA.                                |
| cdh2      | 0.352 | -2.841 | cadherin 2, type 1, N-cadherin (neuronal) (CDH2), mRNA.                                               |
| stim1     | 0.352 | -2.841 | stromal interaction molecule 1 (STIM1), mRNA.                                                         |
| raftlin   | 0.352 | -2.841 | raftlin, lipid raft linker 1 (RFTN1), mRNA.                                                           |
| fn3krp    | 0.352 | -2.842 | fructosamine-3-kinase-related protein (FN3KRP), mRNA.                                                 |
| tnrc5     | 0.352 | -2.842 | trinucleotide repeat containing 5 (TNRC5), transcript variant 1, mRNA.                                |
| flj20516  | 0.352 | -2.843 | TIMELESS interacting protein (TIPIN), mRNA.                                                           |
| skiv2l2   | 0.352 | -2.843 | superkiller viralicidic activity 2-like 2 ( <i>S. cerevisiae</i> ) (SKIV2L2), mRNA.                   |
| supt5h    | 0.352 | -2.844 | suppressor of Ty 5 homolog ( <i>S. cerevisiae</i> ) (SUPT5H), mRNA.                                   |
| aven      | 0.352 | -2.844 | apoptosis, caspase activation inhibitor (AVEN), mRNA.                                                 |
| c8orf59   | 0.352 | -2.845 | PREDICTED: chromosome 8 open reading frame 59, transcript variant 2 (C8orf59), mRNA.                  |
| arf3      | 0.352 | -2.845 | ADP-ribosylation factor 3 (ARF3), mRNA.                                                               |
| c20orf22  | 0.351 | -2.845 | chromosome 20 open reading frame 22 (C20orf22), mRNA.                                                 |
| sfrs15    | 0.351 | -2.847 | splicing factor, arginine/serine-rich 15 (SFRS15), mRNA.                                              |
| mbd4      | 0.351 | -2.848 | methyl-CpG binding domain protein 4 (MBD4), mRNA.                                                     |

|             |       |        |                                                                                                                        |
|-------------|-------|--------|------------------------------------------------------------------------------------------------------------------------|
| ichthyin    | 0.351 | -2.849 | PREDICTED: ichthyin protein (ICHTHYIN), mRNA.                                                                          |
| isg20l1     | 0.351 | -2.849 | interferon stimulated exonuclease gene 20kDa-like 1 (ISG20L1), mRNA.                                                   |
| orc6l       | 0.351 | -2.849 | origin recognition complex, subunit 6 like (yeast) (ORC6L), mRNA.                                                      |
| trmt5       | 0.351 | -2.849 | TRM5 tRNA methyltransferase 5 homolog ( <i>S. cerevisiae</i> ) (TRMT5), mRNA.                                          |
| fosb        | 0.351 | -2.852 | FBJ murine osteosarcoma viral oncogene homolog B (FOSB), mRNA.                                                         |
| sarm1       | 0.351 | -2.853 | sterile alpha and TIR motif containing 1 (SARM1), mRNA.                                                                |
| c9orf5      | 0.35  | -2.854 | chromosome 9 open reading frame 5 (C9orf5), mRNA.                                                                      |
| tmem66      | 0.35  | -2.856 | transmembrane protein 66 (TMEM66), mRNA.                                                                               |
| tceb1       | 0.35  | -2.857 | transcription elongation factor B (SIII), polypeptide 1 (15kDa, elongin C) (TCEB1), mRNA.                              |
| kcnj16      | 0.35  | -2.857 | potassium inwardly-rectifying channel, subfamily J, member 16 (KCNJ16), transcript variant 1, mRNA.                    |
| gbf1        | 0.35  | -2.857 | golgi-specific brefeldin A resistance factor 1 (GBF1), mRNA.                                                           |
| mrpl11      | 0.35  | -2.858 | mitochondrial ribosomal protein L11 (MRPL11), nuclear gene encoding mitochondrial protein, transcript variant 1, mRNA. |
| dkfzp686a01 | 0.35  | -2.858 | LIM and calponin homology domains 1 (LIMCH1), mRNA.                                                                    |
| cdc2l2      | 0.35  | -2.861 | cell division cycle 2-like 2 (PITSLRE proteins) (CDC2L2), transcript variant 5, mRNA.                                  |
| itgae       | 0.349 | -2.861 | integrin, alpha E (antigen CD103, human mucosal lymphocyte antigen 1; alpha polypeptide) (ITGAE), mRNA.                |
| rbm9        | 0.349 | -2.863 | RNA binding motif protein 9 (RBM9), transcript variant 2, mRNA.                                                        |
| sfrp1       | 0.349 | -2.863 | secreted frizzled-related protein 1 (SFRP1), mRNA.                                                                     |
| snrp70      | 0.349 | -2.863 | small nuclear ribonucleoprotein 70kDa polypeptide (RNP antigen) (SNRP70), transcript variant 2, mRNA.                  |
| hs.27048    | 0.349 | -2.864 | cDNA FLJ31750 fis, clone NT2RI2007406                                                                                  |
| loc644914   | 0.349 | -2.864 | PREDICTED: similar to H3 histone, family 3B (LOC644914), mRNA.                                                         |
| s100p       | 0.349 | -2.865 | S100 calcium binding protein P (S100P), mRNA.                                                                          |
| gtf2h5      | 0.349 | -2.866 | general transcription factor IIH, polypeptide 5 (GTF2H5), mRNA.                                                        |
| tnfaip1     | 0.349 | -2.866 | tumor necrosis factor, alpha-induced protein 1 (endothelial) (TNFAIP1), mRNA.                                          |
| pfn1        | 0.349 | -2.867 | profilin 1 (PFN1), mRNA.                                                                                               |
| gnb5        | 0.349 | -2.868 | guanine nucleotide binding protein (G protein), beta 5 (GNB5), transcript variant 2, mRNA.                             |
| nfic        | 0.349 | -2.868 | nuclear factor I/C (CCAAT-binding transcription factor) (NFIC), transcript variant 1, mRNA.                            |
| irf1        | 0.349 | -2.868 | interferon regulatory factor 1 (IRF1), mRNA.                                                                           |
| supt6h      | 0.348 | -2.87  | suppressor of Ty 6 homolog ( <i>S. cerevisiae</i> ) (SUPT6H), mRNA.                                                    |
| ube2z       | 0.348 | -2.872 | ubiquitin-conjugating enzyme E2Z (putative) (UBE2Z), mRNA.                                                             |
| tmem44      | 0.348 | -2.873 | transmembrane protein 44 (TMEM44), transcript variant 1, mRNA.                                                         |
| aff4        | 0.348 | -2.874 | AF4/FMR2 family, member 4 (AFF4), mRNA.                                                                                |
| c19orf37    | 0.348 | -2.877 | zinc finger protein 428 (ZNF428), mRNA.                                                                                |
| blvra       | 0.347 | -2.88  | biliverdin reductase A (BLVRA), mRNA.                                                                                  |
| mfsd5       | 0.347 | -2.88  | major facilitator superfamily domain containing 5 (MFSD5), mRNA.                                                       |
| aldh1b1     | 0.347 | -2.88  | aldehyde dehydrogenase 1 family, member B1 (ALDH1B1), nuclear gene encoding mitochondrial protein, mRNA.               |
| ube2e1      | 0.347 | -2.881 | ubiquitin-conjugating enzyme E2E 1 (UBC4/5 homolog, yeast) (UBE2E1), transcript variant 1, mRNA.                       |
| tln2        | 0.347 | -2.881 | talin 2 (TLN2), mRNA.                                                                                                  |
| mars        | 0.347 | -2.881 | methionyl-tRNA synthetase (MARS), mRNA.                                                                                |
| exoc7       | 0.347 | -2.883 | exocyst complex component 7 (EXOC7), transcript variant 1, mRNA.                                                       |
| kiaa0323    | 0.347 | -2.883 | KIAA0323 (KIAA0323), mRNA.                                                                                             |
| ecgf1       | 0.347 | -2.883 | endothelial cell growth factor 1 (platelet-derived) (ECGF1), mRNA.                                                     |
| trim13      | 0.347 | -2.884 | tripartite motif-containing 13 (TRIM13), transcript variant 4, mRNA.                                                   |

|           |       |                                                                                                                           |
|-----------|-------|---------------------------------------------------------------------------------------------------------------------------|
| rab9a     | 0.347 | -2.885 RAB9A, member RAS oncogene family (RAB9A), mRNA.                                                                   |
| msl3l1    | 0.347 | -2.885 male-specific lethal 3-like 1 (Drosophila) (MSL3L1), transcript variant 4, mRNA.                                   |
| cox6a1    | 0.347 | -2.886 cytochrome c oxidase subunit VIa polypeptide 1 (COX6A1), nuclear gene encoding mitochondrial protein, mRNA.        |
| lum       | 0.347 | -2.886 lumican (LUM), mRNA.                                                                                               |
| actr5     | 0.346 | -2.887 ARP5 actin-related protein 5 homolog (yeast) (ACTR5), mRNA.                                                        |
| rtn4ip1   | 0.346 | -2.887 reticulon 4 interacting protein 1 (RTN4IP1), nuclear gene encoding mitochondrial protein, mRNA.                    |
| hs.535028 | 0.346 | -2.89 cDNA: FLJ22720 fis, clone HSI14320                                                                                  |
| calm2     | 0.346 | -2.89 calmodulin 2 (phosphorylase kinase, delta) (CALM2), mRNA.                                                           |
| btg1      | 0.346 | -2.891 B-cell translocation gene 1, anti-proliferative (BTG1), mRNA.                                                      |
| tbc1d7    | 0.346 | -2.894 TBC1 domain family, member 7 (TBC1D7), mRNA.                                                                       |
| cxxc5     | 0.346 | -2.894 CXXC finger 5 (CXXC5), mRNA.                                                                                       |
| chst3     | 0.345 | -2.895 carbohydrate (chondroitin 6) sulfotransferase 3 (CHST3), mRNA.                                                     |
| uqcrc2    | 0.345 | -2.895 ubiquinol-cytochrome c reductase core protein II (UQCRC2), mRNA.                                                   |
| rpl13a    | 0.345 | -2.896 ribosomal protein L13a (RPL13A), mRNA.                                                                             |
| mgc40405  | 0.345 | -2.897 hypothetical protein MGC40405 (MGC40405), mRNA.                                                                    |
| pomt2     | 0.345 | -2.898 protein-O-mannosyltransferase 2 (POMT2), mRNA.                                                                     |
| hcap-g    | 0.345 | -2.898 non-SMC condensin I complex, subunit G (NCAPG), mRNA.                                                              |
| col6a1    | 0.345 | -2.9 collagen, type VI, alpha 1 (COL6A1), mRNA.                                                                           |
| elk1      | 0.345 | -2.9 ELK1, member of ETS oncogene family (ELK1), mRNA.                                                                    |
| nav1      | 0.345 | -2.901 neuron navigator 1 (NAV1), mRNA.                                                                                   |
| hmgb3     | 0.345 | -2.902 high-mobility group box 3 (HMGB3), mRNA.                                                                           |
| nans      | 0.344 | -2.903 N-acetylneuraminic acid synthase (sialic acid synthase) (NANS), mRNA.                                              |
| smarce1   | 0.344 | -2.903 SWI/SNF related, matrix associated, actin dependent regulator of chromatin, subfamily e, member 1 (SMARCE1), mRNA. |
| nqo2      | 0.344 | -2.906 NAD(P)H dehydrogenase, quinone 2 (NQO2), mRNA.                                                                     |
| dpp3      | 0.344 | -2.908 dipeptidyl-peptidase 3 (DPP3), transcript variant 1, mRNA.                                                         |
| hdac6     | 0.344 | -2.908 histone deacetylase 6 (HDAC6), mRNA.                                                                               |
| ddost     | 0.344 | -2.909 dolichyl-diphosphooligosaccharide-protein glycosyltransferase (DDOST), mRNA.                                       |
| c16orf34  | 0.344 | -2.91 hematological and neurological expressed 1-like (HN1L), mRNA.                                                       |
| cyr61     | 0.344 | -2.911 cysteine-rich, angiogenic inducer, 61 (CYR61), mRNA.                                                               |
| thumpd1   | 0.344 | -2.911 THUMP domain containing 1 (THUMPD1), mRNA.                                                                         |
| rps15a    | 0.343 | -2.912 ribosomal protein S15a (RPS15A), transcript variant 2, mRNA.                                                       |
| lass2     | 0.343 | -2.914 LAG1 longevity assurance homolog 2 (S. cerevisiae) (LASS2), transcript variant 3, mRNA.                            |
| fam46a    | 0.343 | -2.914 family with sequence similarity 46, member A (FAM46A), mRNA.                                                       |
| hdac2     | 0.343 | -2.914 histone deacetylase 2 (HDAC2), mRNA.                                                                               |
| hnrpa3    | 0.343 | -2.914 heterogeneous nuclear ribonucleoprotein A3 (HNRPA3), mRNA.                                                         |
| tgfb1     | 0.343 | -2.915 transforming growth factor, beta-induced, 68kDa (TGFB1), mRNA.                                                     |
| flj43339  | 0.343 | -2.916 chromosome 15 open reading frame 52 (C15orf52), mRNA.                                                              |
| gtf2a2    | 0.343 | -2.916 general transcription factor IIA, 2, 12kDa (GTF2A2), mRNA.                                                         |
| c3orf17   | 0.343 | -2.916 chromosome 3 open reading frame 17 (C3orf17), transcript variant 2, mRNA.                                          |
| fcar      | 0.343 | -2.918 Fc fragment of IgA, receptor for (FCAR), transcript variant 10, mRNA.                                              |
| pcolce2   | 0.343 | -2.919 procollagen C-endopeptidase enhancer 2 (PCOLCE2), mRNA.                                                            |
| insig1    | 0.343 | -2.919 insulin induced gene 1 (INSIG1), transcript variant 2, mRNA.                                                       |

|           |       |        |                                                                                                                |
|-----------|-------|--------|----------------------------------------------------------------------------------------------------------------|
| crmp1     | 0.343 | -2.919 | collapsin response mediator protein 1 (CRMP1), transcript variant 1, mRNA.                                     |
| timp1     | 0.343 | -2.919 | TIMP metallopeptidase inhibitor 1 (TIMP1), mRNA.                                                               |
| kiaa1794  | 0.343 | -2.919 | KIAA1794 (KIAA1794), mRNA.                                                                                     |
| zfand2a   | 0.343 | -2.92  | zinc finger, AN1-type domain 2A (ZFAND2A), mRNA.                                                               |
| dtx3      | 0.342 | -2.921 | deltex 3 homolog (Drosophila) (DTX3), mRNA.                                                                    |
| efnb2     | 0.342 | -2.921 | ephrin-B2 (EFNB2), mRNA.                                                                                       |
| loc654103 | 0.342 | -2.922 | PREDICTED: similar to solute carrier family 25, member 37 (LOC654103), mRNA.                                   |
| pfdn5     | 0.342 | -2.923 | prefoldin subunit 5 (PFDN5), transcript variant 3, mRNA.                                                       |
| spfh1     | 0.342 | -2.924 | ER lipid raft associated 1 (ERLIN1), mRNA.                                                                     |
| pelp1     | 0.342 | -2.924 | proline, glutamic acid and leucine rich protein 1 (PELP1), mRNA.                                               |
| plec1     | 0.342 | -2.924 | plectin 1, intermediate filament binding protein 500kDa (PLEC1), transcript variant 1, mRNA.                   |
| slc30a9   | 0.342 | -2.925 | solute carrier family 30 (zinc transporter), member 9 (SLC30A9), mRNA.                                         |
| hs.570308 | 0.342 | -2.925 | BX099724 Soares_fetal_liver_spleen_1NFLS_S1 cDNA clone IMAGp998F201004, mRNA sequence                          |
| loc642489 | 0.342 | -2.926 | PREDICTED: similar to FK506-binding protein 1A (LOC642489), mRNA.                                              |
| btbd6     | 0.342 | -2.926 | BTB (POZ) domain containing 6 (BTBD6), mRNA.                                                                   |
| sema3c    | 0.342 | -2.926 | sema domain, immunoglobulin domain (Ig), short basic domain, secreted, (semaphorin) 3C (SEMA3C), mRNA.         |
| pdcl3     | 0.342 | -2.927 | phosducin-like 3 (PDCL3), mRNA.                                                                                |
| dhrs7     | 0.342 | -2.928 | dehydrogenase/reductase (SDR family) member 7 (DHR7), mRNA.                                                    |
| elof1     | 0.341 | -2.929 | elongation factor 1 homolog (ELF1, S. cerevisiae) (ELOF1), mRNA.                                               |
| cebpa     | 0.341 | -2.929 | CCAAT/enhancer binding protein (C/EBP), alpha (CEBPA), mRNA.                                                   |
| ssh1      | 0.341 | -2.93  | slingshot homolog 1 (Drosophila) (SSH1), mRNA.                                                                 |
| eppb9     | 0.341 | -2.93  | B9 protein (EPPB9), mRNA.                                                                                      |
| loc493856 | 0.341 | -2.931 | zinc finger, CDGSH-type domain 2 (ZCD2), mRNA.                                                                 |
| coil      | 0.341 | -2.931 | coilin (COIL), mRNA.                                                                                           |
| atp1b1    | 0.341 | -2.932 | ATPase, Na <sup>+</sup> /K <sup>+</sup> transporting, beta 1 polypeptide (ATP1B1), transcript variant 1, mRNA. |
| gps2      | 0.341 | -2.932 | G protein pathway suppressor 2 (GPS2), mRNA.                                                                   |
| cct6ap1   | 0.341 | -2.934 | chaperonin containing TCP1, subunit 6A (zeta 1) pseudogene 1 (CCT6AP1) on chromosome 7.                        |
| igfbp6    | 0.341 | -2.934 | insulin-like growth factor binding protein 6 (IGFBP6), mRNA.                                                   |
| fah       | 0.341 | -2.935 | fumarylacetoacetate hydrolase (fumarylacetoacetase) (FAH), mRNA.                                               |
| lrrc54    | 0.341 | -2.936 | tsukushin (TSKU), mRNA.                                                                                        |
| rhbdd3    | 0.34  | -2.937 | rhomboid domain containing 3 (RHBDD3), mRNA.                                                                   |
| pdgfc     | 0.34  | -2.939 | platelet derived growth factor C (PDGFC), mRNA.                                                                |
| hddc2     | 0.34  | -2.94  | HD domain containing 2 (HDDC2), mRNA.                                                                          |
| alox5ap   | 0.34  | -2.941 | arachidonate 5-lipoxygenase-activating protein (ALOX5AP), mRNA.                                                |
| hipk2     | 0.34  | -2.942 | homeodomain interacting protein kinase 2 (HIPK2), mRNA.                                                        |
| smek2     | 0.34  | -2.944 | SMEK homolog 2, suppressor of mek1 (Dictyostelium) (SMEK2), mRNA.                                              |
| thumpd2   | 0.34  | -2.945 | THUMP domain containing 2 (THUMPD2), mRNA.                                                                     |
| atbf1     | 0.339 | -2.947 | AT-binding transcription factor 1 (ATBF1), mRNA.                                                               |
| inpp5a    | 0.339 | -2.948 | PREDICTED: inositol polyphosphate-5-phosphatase, 40kDa (INPP5A), mRNA.                                         |
| dpm1      | 0.339 | -2.948 | dolichyl-phosphate mannosyltransferase polypeptide 1, catalytic subunit (DPM1), mRNA.                          |
| dus1l     | 0.339 | -2.948 | dihydrouridine synthase 1-like (S. cerevisiae) (DUS1L), mRNA.                                                  |
| loc151579 | 0.339 | -2.949 | PREDICTED: similar to basic leucine zipper and W2 domains 1 (LOC151579), mRNA.                                 |

|           |       |        |                                                                                                                                   |
|-----------|-------|--------|-----------------------------------------------------------------------------------------------------------------------------------|
| loc650428 | 0.339 | -2.949 | PREDICTED: similar to keratin, hair, basic, 6 (LOC650428), mRNA.                                                                  |
| ckap4     | 0.339 | -2.95  | cytoskeleton-associated protein 4 (CKAP4), mRNA.                                                                                  |
| loc728643 | 0.339 | -2.951 | heterogeneous nuclear ribonucleoprotein A1 pseudogene (LOC728643) on chromosome 10.                                               |
| fut8      | 0.339 | -2.952 | fucosyltransferase 8 (alpha (1,6) fucosyltransferase) (FUT8), transcript variant 4, mRNA.                                         |
| nup210    | 0.339 | -2.953 | nucleoporin 210kDa (NUP210), mRNA.                                                                                                |
| mettl1    | 0.339 | -2.954 | methyltransferase like 1 (METTL1), transcript variant 2, mRNA.                                                                    |
| loc644931 | 0.338 | -2.955 | PREDICTED: hypothetical LOC644931 (LOC644931), mRNA.                                                                              |
| ep400     | 0.338 | -2.955 | E1A binding protein p400 (EP400), mRNA.                                                                                           |
| c17orf40  | 0.338 | -2.955 | UTP6, small subunit (SSU) processome component, homolog (yeast) (UTP6), mRNA.                                                     |
| srp14p1   | 0.338 | -2.959 | signal recognition particle 14kDa (homologous Alu RNA binding protein) pseudogene 1 (SRP14P1) on chromosome 12.                   |
| rin2      | 0.338 | -2.961 | Ras and Rab interactor 2 (RIN2), mRNA.                                                                                            |
| loc493869 | 0.338 | -2.961 | similar to RIKEN cDNA 2310016C16 (LOC493869), mRNA.                                                                               |
| c19orf48  | 0.338 | -2.962 | chromosome 19 open reading frame 48 (C19orf48), mRNA.                                                                             |
| cd59      | 0.338 | -2.963 | CD59 molecule, complement regulatory protein (CD59), transcript variant 4, mRNA.                                                  |
| c6orf153  | 0.338 | -2.963 | chromosome 6 open reading frame 153 (C6orf153), mRNA.                                                                             |
| fam113a   | 0.338 | -2.963 | family with sequence similarity 113, member A (FAM113A), mRNA.                                                                    |
| dpm3      | 0.337 | -2.963 | dolichyl-phosphate mannosyltransferase polypeptide 3 (DPM3), transcript variant 2, mRNA.                                          |
| c10orf38  | 0.337 | -2.964 | chromosome 10 open reading frame 38 (C10orf38), mRNA.                                                                             |
| fam73a    | 0.337 | -2.966 | family with sequence similarity 73, member A (FAM73A), mRNA.                                                                      |
| huwe1     | 0.337 | -2.968 | HECT, UBA and WWE domain containing 1 (HUWE1), mRNA.                                                                              |
| mpp1      | 0.337 | -2.968 | membrane protein, palmitoylated 1, 55kDa (MPP1), mRNA.                                                                            |
| igfbp4    | 0.337 | -2.969 | insulin-like growth factor binding protein 4 (IGFBP4), mRNA.                                                                      |
| pts       | 0.337 | -2.969 | 6-pyruvoyltetrahydropterin synthase (PTS), mRNA.                                                                                  |
| loc644250 | 0.337 | -2.969 | PREDICTED: hypothetical protein LOC644250 (LOC644250), mRNA.                                                                      |
| ctgf      | 0.337 | -2.969 | connective tissue growth factor (CTGF), mRNA.                                                                                     |
| klhl9     | 0.337 | -2.969 | kelch-like 9 (Drosophila) (KLHL9), mRNA.                                                                                          |
| ndufb3    | 0.337 | -2.97  | NADH dehydrogenase (ubiquinone) 1 beta subcomplex, 3, 12kDa (NDUFB3), mRNA.                                                       |
| smarcad1  | 0.337 | -2.97  | SWI/SNF-related, matrix-associated actin-dependent regulator of chromatin, subfamily a, containing DEAD/H box 1 (SMARCAD1), mRNA. |
| wdr21a    | 0.336 | -2.972 | WD repeat domain 21A (WDR21A), transcript variant 1, mRNA.                                                                        |
| ypel5     | 0.336 | -2.973 | yippee-like 5 (Drosophila) (YPEL5), mRNA.                                                                                         |
| aytl2     | 0.336 | -2.973 | acyltransferase like 2 (AYTL2), mRNA.                                                                                             |
| ahsa2     | 0.336 | -2.974 | AHA1, activator of heat shock 90kDa protein ATPase homolog 2 (yeast) (AHS2), mRNA.                                                |
| ddef2     | 0.336 | -2.974 | development and differentiation enhancing factor 2 (DDEF2), mRNA.                                                                 |
| mdp-1     | 0.336 | -2.975 | magnesium-dependent phosphatase 1 (MDP-1), mRNA.                                                                                  |
| c10orf114 | 0.336 | -2.975 | chromosome 10 open reading frame 114 (C10orf114), mRNA.                                                                           |
| adar      | 0.336 | -2.979 | adenosine deaminase, RNA-specific (ADAR), transcript variant 2, mRNA.                                                             |
| hs.542993 | 0.336 | -2.98  | xj89b12.x1 Soares_NFL_T_GBC_S1 cDNA clone IMAGE:2664383 3, mRNA sequence                                                          |
| gabaryl1  | 0.336 | -2.981 | GABA(A) receptor-associated protein like 1 (GABARAPL1), mRNA.                                                                     |
| zc3h15    | 0.335 | -2.985 | zinc finger CCCH-type containing 15 (ZC3H15), mRNA.                                                                               |
| rbck1     | 0.335 | -2.985 | RanBP-type and C3HC4-type zinc finger containing 1 (RBCK1), transcript variant 1, mRNA.                                           |
| creg1     | 0.335 | -2.985 | cellular repressor of E1A-stimulated genes 1 (CREG1), mRNA.                                                                       |

|             |       |                                                                                                                                |
|-------------|-------|--------------------------------------------------------------------------------------------------------------------------------|
| dynlrb1     | 0.335 | -2.986 dynein, light chain, roadblock-type 1 (DYNLRB1), mRNA.                                                                  |
| wasf2       | 0.335 | -2.986 WAS protein family, member 2 (WASF2), mRNA.                                                                             |
| ahsa1       | 0.335 | -2.986 AHA1, activator of heat shock 90kDa protein ATPase homolog 1 (yeast) (AHSA1), mRNA.                                     |
| c20orf172   | 0.335 | -2.987 DSN1, MIND kinetochore complex component, homolog ( <i>S. cerevisiae</i> ) (DSN1), mRNA.                                |
| znf593      | 0.335 | -2.987 zinc finger protein 593 (ZNF593), mRNA.                                                                                 |
| ftsj1       | 0.335 | -2.988 FtsJ homolog 1 ( <i>E. coli</i> ) (FTSJ1), transcript variant 1, mRNA.                                                  |
| gpr126      | 0.335 | -2.989 G protein-coupled receptor 126 (GPR126), transcript variant a2, mRNA.                                                   |
| rp1-112k5.2 | 0.334 | -2.99 TSR2, 20S rRNA accumulation, homolog ( <i>S. cerevisiae</i> ) (TSR2), mRNA.                                              |
| brd8        | 0.334 | -2.992 bromodomain containing 8 (BRD8), transcript variant 3, mRNA.                                                            |
| dffa        | 0.334 | -2.993 DNA fragmentation factor, 45kDa, alpha polypeptide (DFFA), transcript variant 2, mRNA.                                  |
| slc16a2     | 0.334 | -2.994 solute carrier family 16, member 2 (monocarboxylic acid transporter 8) (SLC16A2), mRNA.                                 |
| tarbp1      | 0.334 | -2.995 Tar (HIV-1) RNA binding protein 1 (TARBP1), mRNA.                                                                       |
| loc645138   | 0.334 | -2.996 PREDICTED: similar to ribosomal protein S11 (LOC645138), mRNA.                                                          |
| rnf135      | 0.334 | -2.996 ring finger protein 135 (RNF135), transcript variant 2, mRNA.                                                           |
| znhit2      | 0.334 | -2.997 zinc finger, HIT type 2 (ZNHIT2), mRNA.                                                                                 |
| flj20701    | 0.334 | -2.997 phosphotyrosine interaction domain containing 1 (PID1), mRNA.                                                           |
| tuft1       | 0.334 | -2.998 tuftelin 1 (TUFT1), mRNA.                                                                                               |
| loc346887   | 0.334 | -2.998 PREDICTED: similar to solute carrier family 16 (monocarboxylic acid transporters), member 14 (LOC346887), mRNA.         |
| nudt5       | 0.334 | -2.998 nudix (nucleoside diphosphate linked moiety X)-type motif 5 (NUDT5), mRNA.                                              |
| nucb2       | 0.333 | -2.999 nucleobindin 2 (NUCB2), mRNA.                                                                                           |
| hmg1l1      | 0.333 | -2.999 high-mobility group (nonhistone chromosomal) protein 1-like 1 (HMG1L1), mRNA.                                           |
| taf7        | 0.333 | -2.999 TAF7 RNA polymerase II, TATA box binding protein (TBP)-associated factor, 55kDa (TAF7), mRNA.                           |
| stub1       | 0.333 | -2.999 STIP1 homology and U-box containing protein 1 (STUB1), mRNA.                                                            |
| fzd2        | 0.333 | -3 frizzled homolog 2 ( <i>Drosophila</i> ) (FZD2), mRNA.                                                                      |
| c17orf71    | 0.333 | -3 chromosome 17 open reading frame 71 (C17orf71), mRNA.                                                                       |
| cnot7       | 0.333 | -3.001 CCR4-NOT transcription complex, subunit 7 (CNOT7), transcript variant 2, mRNA.                                          |
| cnih4       | 0.333 | -3.002 cornichon homolog 4 ( <i>Drosophila</i> ) (CNIH4), mRNA.                                                                |
| c20orf30    | 0.333 | -3.003 chromosome 20 open reading frame 30 (C20orf30), transcript variant 2, mRNA.                                             |
| mllt11      | 0.333 | -3.003 myeloid/lymphoid or mixed-lineage leukemia (trithorax homolog, <i>Drosophila</i> ); translocated to, 11 (MLLT11), mRNA. |
| rpl37a      | 0.333 | -3.004 ribosomal protein L37a (RPL37A), mRNA.                                                                                  |
| eif2ak4     | 0.333 | -3.004 eukaryotic translation initiation factor 2 alpha kinase 4 (EIF2AK4), mRNA.                                              |
| loc653658   | 0.333 | -3.004 PREDICTED: similar to ribosomal protein S23 (LOC653658), mRNA.                                                          |
| ywhag       | 0.333 | -3.004 tyrosine 3-monooxygenase/tryptophan 5-monooxygenase activation protein, gamma polypeptide (YWHAG), mRNA.                |
| fn5         | 0.333 | -3.005 chromosome 11 open reading frame 75 (C11orf75), mRNA.                                                                   |
| bex1        | 0.332 | -3.009 brain expressed, X-linked 1 (BEX1), mRNA.                                                                               |
| kiaa0372    | 0.332 | -3.01 KIAA0372 (KIAA0372), mRNA.                                                                                               |
| sec14l4     | 0.332 | -3.013 SEC14-like 4 ( <i>S. cerevisiae</i> ) (SEC14L4), mRNA.                                                                  |
| tspyl1      | 0.332 | -3.013 TSPY-like 1 (TSPYL1), mRNA.                                                                                             |
| loc400948   | 0.332 | -3.015 PREDICTED: similar to CG33774-PA (LOC400948), mRNA.                                                                     |
| epas1       | 0.332 | -3.015 endothelial PAS domain protein 1 (EPAS1), mRNA.                                                                         |
| kiaa0152    | 0.332 | -3.016 KIAA0152 (KIAA0152), mRNA.                                                                                              |
| chgn        | 0.331 | -3.017 chondroitin beta1,4 N-acetylgalactosaminyltransferase (ChGn), mRNA.                                                     |



|           |       |                                                                                                                               |
|-----------|-------|-------------------------------------------------------------------------------------------------------------------------------|
| bmpr2     | 0.331 | -3.017 bone morphogenetic protein receptor, type II (serine/threonine kinase) (BMPR2), mRNA.                                  |
| rabac1    | 0.331 | -3.02 Rab acceptor 1 (prenylated) (RABAC1), mRNA.                                                                             |
| mrpl34    | 0.331 | -3.023 mitochondrial ribosomal protein L34 (MRPL34), nuclear gene encoding mitochondrial protein, mRNA.                       |
| zfr       | 0.331 | -3.025 zinc finger RNA binding protein (ZFR), mRNA.                                                                           |
| dhrs10    | 0.33  | -3.027 hydroxysteroid (17-beta) dehydrogenase 14 (HSD17B14), mRNA.                                                            |
| mgmt      | 0.33  | -3.027 O-6-methylguanine-DNA methyltransferase (MGMT), mRNA.                                                                  |
| kiaa0831  | 0.33  | -3.028 KIAA0831 (KIAA0831), mRNA.                                                                                             |
| mki67ip   | 0.33  | -3.03 MKI67 (FHA domain) interacting nucleolar phosphoprotein (MKI67IP), mRNA.                                                |
| golga3    | 0.33  | -3.03 golgi autoantigen, golgin subfamily a, 3 (GOLGA3), mRNA.                                                                |
| c1orf176  | 0.33  | -3.03 chromosome 1 open reading frame 176 (C1orf176), mRNA.                                                                   |
| klhdc2    | 0.33  | -3.034 kelch domain containing 2 (KLHDC2), mRNA.                                                                              |
| ext1      | 0.33  | -3.034 exostoses (multiple) 1 (EXT1), mRNA.                                                                                   |
| mrpl10    | 0.33  | -3.034 mitochondrial ribosomal protein L10 (MRPL10), nuclear gene encoding mitochondrial protein, transcript variant 1, mRNA. |
| syt11     | 0.33  | -3.034 synaptotagmin XI (SYT11), mRNA.                                                                                        |
| cdkn1a    | 0.33  | -3.035 cyclin-dependent kinase inhibitor 1A (p21, Cip1) (CDKN1A), transcript variant 2, mRNA.                                 |
| peo1      | 0.329 | -3.037 progressive external ophthalmoplegia 1 (PEO1), mRNA.                                                                   |
| ddah1     | 0.329 | -3.038 dimethylarginine dimethylaminohydrolase 1 (DDAH1), mRNA.                                                               |
| topbp1    | 0.329 | -3.038 topoisomerase (DNA) II binding protein 1 (TOPBP1), mRNA.                                                               |
| krthb1    | 0.329 | -3.043 keratin 81 (KRT81), mRNA.                                                                                              |
| rps26l    | 0.328 | -3.047 40S ribosomal protein S26-like (RPS26L) on chromosome 13.                                                              |
| loc440354 | 0.328 | -3.047 PI-3-kinase-related kinase SMG-1 pseudogene (LOC440354) on chromosome 16.                                              |
| bcdin3    | 0.328 | -3.047 methylphosphate capping enzyme (MEPCE), mRNA.                                                                          |
| nol5a     | 0.328 | -3.048 nucleolar protein 5A (56kDa with KKE/D repeat) (NOL5A), mRNA.                                                          |
| axin2     | 0.328 | -3.048 axin 2 (conductin, axil) (AXIN2), mRNA.                                                                                |
| snapc1    | 0.328 | -3.049 small nuclear RNA activating complex, polypeptide 1, 43kDa (SNAPC1), mRNA.                                             |
| pdc4      | 0.328 | -3.05 programmed cell death 4 (neoplastic transformation inhibitor) (PDC4), transcript variant 2, mRNA.                       |
| ddef1     | 0.328 | -3.05 development and differentiation enhancing factor 1 (DDEF1), mRNA.                                                       |
| rps3a     | 0.328 | -3.051 ribosomal protein S3A (RPS3A), mRNA.                                                                                   |
| arhgap10  | 0.328 | -3.051 Rho GTPase activating protein 10 (ARHGAP10), mRNA.                                                                     |
| vegfc     | 0.327 | -3.054 vascular endothelial growth factor C (VEGFC), mRNA.                                                                    |
| ldhb      | 0.327 | -3.057 lactate dehydrogenase B (LDHB), mRNA.                                                                                  |
| mgc2408   | 0.327 | -3.058 hypothetical protein MGC2408 (MGC2408), mRNA.                                                                          |
| loc644934 | 0.327 | -3.058 PREDICTED: similar to 40S ribosomal protein S26, transcript variant 2 (LOC644934), mRNA.                               |
| hs.397465 | 0.327 | -3.059 mRNA; cDNA DKFZp686F1546 (from clone DKFZp686F1546)                                                                    |
| stx8      | 0.327 | -3.06 syntaxin 8 (STX8), mRNA.                                                                                                |
| creb3l2   | 0.327 | -3.061 cAMP responsive element binding protein 3-like 2 (CREB3L2), mRNA.                                                      |
| flj13912  | 0.327 | -3.061 GINS complex subunit 3 (Psf3 homolog) (GINS3), mRNA.                                                                   |
| capzb     | 0.327 | -3.062 capping protein (actin filament) muscle Z-line, beta (CAPZB), mRNA.                                                    |
| gas6      | 0.326 | -3.066 growth arrest-specific 6 (GAS6), mRNA.                                                                                 |
| erh       | 0.326 | -3.066 enhancer of rudimentary homolog (Drosophila) (ERH), mRNA.                                                              |
| loc647048 | 0.326 | -3.066 PREDICTED: similar to hypothetical gene LOC283846 (LOC647048), mRNA.                                                   |
| slc4a2    | 0.326 | -3.067 solute carrier family 4, anion exchanger, member 2 (erythrocyte membrane protein band 3-like 1) (SLC4A2), mRNA.        |

|           |       |                                                                                                                             |
|-----------|-------|-----------------------------------------------------------------------------------------------------------------------------|
| nox4      | 0.325 | -3.073 NADPH oxidase 4 (NOX4), mRNA.                                                                                        |
| loc643509 | 0.325 | -3.074 PREDICTED: similar to Dihydrofolate reductase, transcript variant 1 (LOC643509), mRNA.                               |
| laptm4a   | 0.325 | -3.074 lysosomal-associated protein transmembrane 4 alpha (LAPTM4A), mRNA.                                                  |
| fbxo32    | 0.325 | -3.075 F-box protein 32 (FBXO32), transcript variant 2, mRNA.                                                               |
| rrs1      | 0.325 | -3.076 RRS1 ribosome biogenesis regulator homolog ( <i>S. cerevisiae</i> ) (RRS1), mRNA.                                    |
| lrp11     | 0.325 | -3.076 low density lipoprotein receptor-related protein 11 (LRP11), mRNA.                                                   |
| hs.202577 | 0.325 | -3.077 cDNA FLJ34585 fis, clone KIDNE2008758                                                                                |
| isoc2     | 0.325 | -3.077 isochorismatase domain containing 2 (ISOC2), mRNA.                                                                   |
| slc22a4   | 0.325 | -3.079 solute carrier family 22 (organic cation transporter), member 4 (SLC22A4), mRNA.                                     |
| mrpl13    | 0.325 | -3.08 mitochondrial ribosomal protein L13 (MRPL13), nuclear gene encoding mitochondrial protein, mRNA.                      |
| jmjd1b    | 0.325 | -3.08 jumonji domain containing 1B (JMJD1B), mRNA.                                                                          |
| rhoa      | 0.325 | -3.08 ras homolog gene family, member A (RHOA), mRNA.                                                                       |
| socs2     | 0.325 | -3.081 suppressor of cytokine signaling 2 (SOCS2), mRNA.                                                                    |
| hnrpa0    | 0.324 | -3.082 heterogeneous nuclear ribonucleoprotein A0 (HNRPA0), mRNA.                                                           |
| golp2     | 0.324 | -3.083 golgi phosphoprotein 2 (GOLPH2), transcript variant 2, mRNA.                                                         |
| hist2h2ac | 0.324 | -3.084 histone cluster 2, H2ac (HIST2H2AC), mRNA.                                                                           |
| kiaa0556  | 0.324 | -3.088 KIAA0556 (KIAA0556), mRNA.                                                                                           |
| c17orf25  | 0.324 | -3.091 glyoxalase domain containing 4 (GLOD4), mRNA.                                                                        |
| rars      | 0.324 | -3.091 arginyl-tRNA synthetase (RARS), mRNA.                                                                                |
| gripap1   | 0.324 | -3.091 GRIP1 associated protein 1 (GRIPAP1), transcript variant 2, mRNA.                                                    |
| c20orf177 | 0.323 | -3.092 chromosome 20 open reading frame 177 (C20orf177), mRNA.                                                              |
| hdgfrp3   | 0.323 | -3.094 hepatoma-derived growth factor, related protein 3 (HDGFRP3), mRNA.                                                   |
| hist1h2bd | 0.323 | -3.095 histone cluster 1, H2bd (HIST1H2BD), transcript variant 1, mRNA.                                                     |
| alg8      | 0.323 | -3.095 asparagine-linked glycosylation 8 homolog (yeast, alpha-1,3-glucosyltransferase) (ALG8), transcript variant 2, mRNA. |
| c1orf43   | 0.323 | -3.095 chromosome 1 open reading frame 43 (C1orf43), transcript variant 1, mRNA.                                            |
| tspan10   | 0.323 | -3.095 tetraspanin 10 (TSPAN10), mRNA.                                                                                      |
| hnrph3    | 0.323 | -3.097 heterogeneous nuclear ribonucleoprotein H3 (2H9) (HNRPH3), transcript variant 2H9A, mRNA.                            |
| gcnt3     | 0.323 | -3.099 glucosaminyl (N-acetyl) transferase 3, mucin type (GCNT3), mRNA.                                                     |
| gmpr2     | 0.323 | -3.1 guanosine monophosphate reductase 2 (GMPR2), transcript variant 2, mRNA.                                               |
| cdk5      | 0.323 | -3.1 cyclin-dependent kinase 5 (CDK5), mRNA.                                                                                |
| stx3a     | 0.323 | -3.1 syntaxin 3 (STX3), mRNA.                                                                                               |
| pola1     | 0.323 | -3.1 polymerase (DNA directed), alpha 1 (POLA1), mRNA.                                                                      |
| hlx1      | 0.323 | -3.1 H2.0-like homeobox (HLX), mRNA.                                                                                        |
| wdr73     | 0.323 | -3.101 WD repeat domain 73 (WDR73), mRNA.                                                                                   |
| nexn      | 0.322 | -3.101 nexilin (F actin binding protein) (NEXN), mRNA.                                                                      |
| gaa       | 0.322 | -3.104 glucosidase, alpha; acid (Pompe disease, glycogen storage disease type II) (GAA), mRNA.                              |
| leprot    | 0.322 | -3.104 leptin receptor overlapping transcript (LEPROT), mRNA.                                                               |
| usp36     | 0.322 | -3.105 ubiquitin specific peptidase 36 (USP36), mRNA.                                                                       |
| rock2     | 0.322 | -3.106 Rho-associated, coiled-coil containing protein kinase 2 (ROCK2), mRNA.                                               |
| nup62     | 0.322 | -3.107 nucleoporin 62kDa (NUP62), transcript variant 1, mRNA.                                                               |
| nadsyn1   | 0.322 | -3.108 NAD synthetase 1 (NADSYN1), mRNA.                                                                                    |
| pomgnt1   | 0.321 | -3.115 protein O-linked mannose beta1,2-N-acetylglucosaminyltransferase (POMGNT1), mRNA.                                    |

|           |       |        |                                                                                                                                                                       |
|-----------|-------|--------|-----------------------------------------------------------------------------------------------------------------------------------------------------------------------|
| arl6ip5   | 0.321 | -3.115 | ADP-ribosylation-like factor 6 interacting protein 5 (ARL6IP5), mRNA.                                                                                                 |
| atf5      | 0.321 | -3.116 | activating transcription factor 5 (ATF5), mRNA.                                                                                                                       |
| znf263    | 0.321 | -3.116 | zinc finger protein 263 (ZNF263), mRNA.                                                                                                                               |
| pigy      | 0.32  | -3.12  | phosphatidylinositol glycan, class Y (PIGY), mRNA.                                                                                                                    |
| ddx28     | 0.32  | -3.122 | DEAD (Asp-Glu-Ala-Asp) box polypeptide 28 (DDX28), nuclear gene encoding mitochondrial protein, mRNA.                                                                 |
| blmh      | 0.32  | -3.122 | bleomycin hydrolase (BLMH), mRNA.                                                                                                                                     |
| nsun2     | 0.32  | -3.123 | NOL1/NOP2/Sun domain family, member 2 (NSUN2), mRNA.                                                                                                                  |
| c17orf62  | 0.32  | -3.124 | chromosome 17 open reading frame 62 (C17orf62), mRNA.                                                                                                                 |
| zic2      | 0.32  | -3.125 | Zic family member 2 (odd-paired homolog, Drosophila) (ZIC2), mRNA.                                                                                                    |
| dld       | 0.32  | -3.129 | dihydrolipoamide dehydrogenase (E3 component of pyruvate dehydrogenase complex, 2-oxo-glutarate complex, branched chain keto acid dehydrogenase complex) (DLD), mRNA. |
| cct5      | 0.32  | -3.13  | chaperonin containing TCP1, subunit 5 (epsilon) (CCT5), mRNA.                                                                                                         |
| ddx27     | 0.319 | -3.13  | DEAD (Asp-Glu-Ala-Asp) box polypeptide 27 (DDX27), mRNA.                                                                                                              |
| tmem2     | 0.319 | -3.131 | transmembrane protein 2 (TMEM2), mRNA.                                                                                                                                |
| bax       | 0.319 | -3.132 | BCL2-associated X protein (BAX), transcript variant beta, mRNA.                                                                                                       |
| phtf1     | 0.319 | -3.133 | putative homeodomain transcription factor 1 (PHTF1), mRNA.                                                                                                            |
| cebpd     | 0.319 | -3.133 | CCAAT/enhancer binding protein (C/EBP), delta (CEBPD), mRNA.                                                                                                          |
| loc652356 | 0.319 | -3.133 | PREDICTED: similar to voltage-dependent anion channel 2 (LOC652356), mRNA.                                                                                            |
| chst7     | 0.319 | -3.135 | carbohydrate (N-acetylglucosamine 6-O) sulfotransferase 7 (CHST7), mRNA.                                                                                              |
| mrpl16    | 0.319 | -3.136 | mitochondrial ribosomal protein L16 (MRPL16), nuclear gene encoding mitochondrial protein, mRNA.                                                                      |
| bcl9l     | 0.319 | -3.137 | B-cell CLL/lymphoma 9-like (BCL9L), mRNA.                                                                                                                             |
| ina       | 0.319 | -3.139 | internexin neuronal intermediate filament protein, alpha (INA), mRNA.                                                                                                 |
| srgn      | 0.318 | -3.141 | serglycin (SRGN), mRNA.                                                                                                                                               |
| mfge8     | 0.318 | -3.141 | milk fat globule-EGF factor 8 protein (MFGE8), mRNA.                                                                                                                  |
| mknk2     | 0.318 | -3.142 | MAP kinase interacting serine/threonine kinase 2 (MKNK2), transcript variant 2, mRNA.                                                                                 |
| ndrg3     | 0.318 | -3.142 | NDRG family member 3 (NDRG3), transcript variant 2, mRNA.                                                                                                             |
| pa2g4     | 0.318 | -3.143 | proliferation-associated 2G4, 38kDa (PA2G4), mRNA.                                                                                                                    |
| flj10781  | 0.318 | -3.143 | hypothetical protein FLJ10781 (FLJ10781), mRNA.                                                                                                                       |
| anxa8     | 0.318 | -3.144 | annexin A8-like 2 (ANXA8L2), mRNA.                                                                                                                                    |
| fam20b    | 0.318 | -3.144 | family with sequence similarity 20, member B (FAM20B), mRNA.                                                                                                          |
| mgc24039  | 0.318 | -3.145 | hypothetical protein MGC24039 (MGC24039), mRNA.                                                                                                                       |
| sac3d1    | 0.318 | -3.147 | SAC3 domain containing 1 (SAC3D1), mRNA.                                                                                                                              |
| gmnn      | 0.318 | -3.147 | geminin, DNA replication inhibitor (GMNN), mRNA.                                                                                                                      |
| serpine1  | 0.318 | -3.148 | serpin peptidase inhibitor, clade E (nexin, plasminogen activator inhibitor type 1), member 1 (SERPINE1), mRNA.                                                       |
| spr       | 0.318 | -3.149 | sepiapterin reductase (7,8-dihydrobiopterin:NADP+ oxidoreductase) (SPR), mRNA.                                                                                        |
| sod1      | 0.318 | -3.15  | superoxide dismutase 1, soluble (amyotrophic lateral sclerosis 1 (adult)) (SOD1), mRNA.                                                                               |
| c7orf36   | 0.317 | -3.15  | chromosome 7 open reading frame 36 (C7orf36), mRNA.                                                                                                                   |
| dync1h1   | 0.317 | -3.151 | dynein, cytoplasmic 1, heavy chain 1 (DYNC1H1), mRNA.                                                                                                                 |
| tubgcp5   | 0.317 | -3.154 | tubulin, gamma complex associated protein 5 (TUBGCP5), mRNA.                                                                                                          |
| sqrdl     | 0.317 | -3.156 | sulfide quinone reductase-like (yeast) (SQRDL), mRNA.                                                                                                                 |
| ankrd29   | 0.317 | -3.156 | ankyrin repeat domain 29 (ANKRD29), mRNA.                                                                                                                             |
| cd55      | 0.317 | -3.157 | CD55 molecule, decay accelerating factor for complement (Cromer blood group) (CD55), mRNA.                                                                            |

|              |       |        |                                                                                                                                                                   |
|--------------|-------|--------|-------------------------------------------------------------------------------------------------------------------------------------------------------------------|
| fhod3        | 0.316 | -3.161 | formin homology 2 domain containing 3 (FHOD3), mRNA.                                                                                                              |
| mobkl2b      | 0.316 | -3.162 | MOB1, Mps One Binder kinase activator-like 2B (yeast) (MOBKL2B), mRNA.                                                                                            |
| atp5j        | 0.316 | -3.163 | ATP synthase, H <sup>+</sup> transporting, mitochondrial F0 complex, subunit F6 (ATP5J), nuclear gene encoding mitochondrial protein, transcript variant 3, mRNA. |
| papd5        | 0.316 | -3.163 | PAP associated domain containing 5 (PAPD5), mRNA.                                                                                                                 |
| tpm1         | 0.316 | -3.163 | tropomyosin 1 (alpha) (TPM1), transcript variant 3, mRNA.                                                                                                         |
| gapdh        | 0.316 | -3.164 | glyceraldehyde-3-phosphate dehydrogenase (GAPDH), mRNA.                                                                                                           |
| loc388789    | 0.316 | -3.167 | PREDICTED: hypothetical gene supported by AF147354 (LOC388789), mRNA.                                                                                             |
| zbtb20       | 0.316 | -3.169 | zinc finger and BTB domain containing 20 (ZBTB20), mRNA.                                                                                                          |
| ppp1r10      | 0.316 | -3.169 | protein phosphatase 1, regulatory (inhibitor) subunit 10 (PPP1R10), mRNA.                                                                                         |
| rage         | 0.315 | -3.17  | renal tumor antigen (RAGE), mRNA.                                                                                                                                 |
| flj13149     | 0.315 | -3.17  | FAST kinase domains 5 (FASTKD5), mRNA.                                                                                                                            |
| c6orf62      | 0.315 | -3.173 | chromosome 6 open reading frame 62 (C6orf62), mRNA.                                                                                                               |
| c6orf111     | 0.315 | -3.175 | chromosome 6 open reading frame 111 (C6orf111), mRNA.                                                                                                             |
| fam81a       | 0.315 | -3.175 | family with sequence similarity 81, member A (FAM81A), mRNA.                                                                                                      |
| ccdc24       | 0.315 | -3.176 | coiled-coil domain containing 24 (CCDC24), mRNA.                                                                                                                  |
| dkfzp762i137 | 0.315 | -3.176 | zinc finger protein 786 (ZNF786), mRNA.                                                                                                                           |
| rnuxa        | 0.315 | -3.177 | RNA U, small nuclear RNA export adaptor (phosphorylation regulated) (RNUXA), mRNA.                                                                                |
| chd8         | 0.315 | -3.177 | chromodomain helicase DNA binding protein 8 (CHD8), mRNA.                                                                                                         |
| mif4gd       | 0.315 | -3.179 | MIF4G domain containing (MIF4GD), mRNA.                                                                                                                           |
| cul1         | 0.315 | -3.179 | cullin 1 (CUL1), mRNA.                                                                                                                                            |
| kiaa0907     | 0.314 | -3.181 | KIAA0907 (KIAA0907), mRNA.                                                                                                                                        |
| lamb2        | 0.314 | -3.182 | laminin, beta 2 (laminin 5) (LAMB2), mRNA.                                                                                                                        |
| kcnng1       | 0.314 | -3.183 | potassium voltage-gated channel, subfamily G, member 1 (KCNNG1), transcript variant 2, mRNA.                                                                      |
| loc644560    | 0.314 | -3.183 | PREDICTED: region containing F-box protein 10; chromosome 9 open reading frame 105, transcript variant 1 (LOC644560), mRNA                                        |
| lmod3        | 0.314 | -3.183 | leiomodoin 3 (fetal) (LMOD3), mRNA.                                                                                                                               |
| id2          | 0.314 | -3.184 | inhibitor of DNA binding 2, dominant negative helix-loop-helix protein (ID2), mRNA.                                                                               |
| c12orf62     | 0.314 | -3.185 | chromosome 12 open reading frame 62 (C12orf62), mRNA.                                                                                                             |
| slit2        | 0.314 | -3.186 | slit-like 2 (Drosophila) (SLITL2), mRNA.                                                                                                                          |
| ict1         | 0.314 | -3.187 | immature colon carcinoma transcript 1 (ICT1), mRNA.                                                                                                               |
| psma3        | 0.314 | -3.189 | proteasome (prosome, macropain) subunit, alpha type, 3 (PSMA3), transcript variant 1, mRNA.                                                                       |
| rpn2         | 0.313 | -3.192 | ribophorin II (RPN2), mRNA.                                                                                                                                       |
| rbm25        | 0.313 | -3.192 | RNA binding motif protein 25 (RBM25), mRNA.                                                                                                                       |
| hnrph2       | 0.313 | -3.192 | heterogeneous nuclear ribonucleoprotein H2 (H') (HNRPH2), transcript variant 2, mRNA.                                                                             |
| ptrf         | 0.313 | -3.193 | polymerase I and transcript release factor (PTRF), mRNA.                                                                                                          |
| pparbp       | 0.313 | -3.193 | PPAR binding protein (PPARBP), mRNA.                                                                                                                              |
| golt1b       | 0.313 | -3.193 | golgi transport 1 homolog B (S. cerevisiae) (GOLT1B), mRNA.                                                                                                       |
| uchl1        | 0.313 | -3.194 | ubiquitin carboxyl-terminal esterase L1 (ubiquitin thiolesterase) (UCHL1), mRNA.                                                                                  |
| loc644760    | 0.313 | -3.195 | PREDICTED: hypothetical protein LOC644760 (LOC644760), mRNA.                                                                                                      |
| irak1        | 0.313 | -3.196 | interleukin-1 receptor-associated kinase 1 (IRAK1), transcript variant 3, mRNA.                                                                                   |
| gpx4         | 0.313 | -3.196 | glutathione peroxidase 4 (phospholipid hydroperoxidase) (GPX4), transcript variant 2, mRNA.                                                                       |
| loc653147    | 0.313 | -3.198 | PREDICTED: similar to 60S ribosomal protein L26-like 1 (LOC653147), mRNA.                                                                                         |

|           |       |        |                                                                                                                                         |
|-----------|-------|--------|-----------------------------------------------------------------------------------------------------------------------------------------|
| dullard   | 0.313 | -3.199 | dullard homolog ( <i>Xenopus laevis</i> ) (DULLARD), mRNA.                                                                              |
| pafah1b1  | 0.312 | -3.205 | platelet-activating factor acetylhydrolase, isoform Ib, alpha subunit 45kDa (PAFAH1B1), mRNA.                                           |
| sympk     | 0.312 | -3.205 | symplekin (SYMPK), mRNA.                                                                                                                |
| rspo3     | 0.312 | -3.206 | R-spondin 3 homolog ( <i>Xenopus laevis</i> ) (RSPO3), mRNA.                                                                            |
| tmem132a  | 0.312 | -3.207 | transmembrane protein 132A (TMEM132A), transcript variant 2, mRNA.                                                                      |
| tnfrsf12a | 0.312 | -3.208 | tumor necrosis factor receptor superfamily, member 12A (TNFRSF12A), mRNA.                                                               |
| arpc5     | 0.312 | -3.208 | actin related protein 2/3 complex, subunit 5, 16kDa (ARPC5), mRNA.                                                                      |
| cdc9111   | 0.312 | -3.209 | phosphatidylinositol glycan anchor biosynthesis, class U (PIGU), mRNA.                                                                  |
| gpr37     | 0.311 | -3.217 | G protein-coupled receptor 37 (endothelin receptor type B-like) (GPR37), mRNA.                                                          |
| fcmd      | 0.311 | -3.221 | Fukuyama type congenital muscular dystrophy (fukutin) (FCMD), mRNA.                                                                     |
| h2bfs     | 0.31  | -3.222 | H2B histone family, member S (H2BFS), mRNA.                                                                                             |
| cd63      | 0.31  | -3.223 | CD63 antigen (melanoma 1 antigen) (CD63), mRNA.                                                                                         |
| hn1       | 0.31  | -3.224 | hematological and neurological expressed 1 (HN1), transcript variant 1, mRNA.                                                           |
| klhdc5    | 0.31  | -3.228 | kelch domain containing 5 (KLHDC5), mRNA.                                                                                               |
| mtdh      | 0.31  | -3.229 | metadherin (MTDH), mRNA.                                                                                                                |
| yars2     | 0.31  | -3.23  | tyrosyl-tRNA synthetase 2 (mitochondrial) (YARS2), mRNA.                                                                                |
| glt8d1    | 0.31  | -3.23  | glycosyltransferase 8 domain containing 1 (GLT8D1), transcript variant 3, mRNA.                                                         |
| bcor      | 0.31  | -3.231 | BCL6 co-repressor (BCOR), transcript variant 2, mRNA.                                                                                   |
| hs.159264 | 0.309 | -3.232 | Human clone 23948 mRNA sequence                                                                                                         |
| igfbp1    | 0.309 | -3.233 | insulin-like growth factor binding protein 1 (IGFBP1), mRNA.                                                                            |
| thy1      | 0.309 | -3.24  | Thy-1 cell surface antigen (THY1), mRNA.                                                                                                |
| pigm      | 0.308 | -3.242 | phosphatidylinositol glycan, class M (PIGM), mRNA.                                                                                      |
| eif5a     | 0.308 | -3.242 | eukaryotic translation initiation factor 5A (EIF5A), mRNA.                                                                              |
| dnajc7    | 0.308 | -3.243 | DnaJ (Hsp40) homolog, subfamily C, member 7 (DNAJC7), mRNA.                                                                             |
| mgea5     | 0.308 | -3.244 | meningioma expressed antigen 5 (hyaluronidase) (MGEA5), mRNA.                                                                           |
| irs2      | 0.308 | -3.245 | insulin receptor substrate 2 (IRS2), mRNA.                                                                                              |
| loc646197 | 0.308 | -3.247 | PREDICTED: similar to Heat shock protein HSP 90-beta (HSP 84) (Tumor-specific transplantation 84 kDa antigen) (TSTA) (LOC646197), mRNA. |
| mrpl24    | 0.308 | -3.251 | mitochondrial ribosomal protein L24 (MRPL24), nuclear gene encoding mitochondrial protein, transcript variant 2, mRNA.                  |
| zyx       | 0.308 | -3.252 | zyxin (ZYG), transcript variant 1, mRNA.                                                                                                |
| loc130074 | 0.307 | -3.254 | hypothetical protein LOC130074 (LOC130074), mRNA.                                                                                       |
| ankrd13   | 0.307 | -3.259 | ankyrin repeat domain 13 (ANKRD13), mRNA.                                                                                               |
| coro1c    | 0.307 | -3.261 | coronin, actin binding protein, 1C (CORO1C), mRNA.                                                                                      |
| bsdc1     | 0.307 | -3.262 | BSD domain containing 1 (BSDC1), mRNA.                                                                                                  |
| peci      | 0.306 | -3.264 | peroxisomal D3,D2-enoyl-CoA isomerase (PECI), transcript variant 2, mRNA.                                                               |
| atpbd1b   | 0.306 | -3.265 | ATP binding domain 1 family, member B (ATPBD1B), mRNA.                                                                                  |
| ppapdc1b  | 0.306 | -3.266 | phosphatidic acid phosphatase type 2 domain containing 1B (PPAPDC1B), mRNA.                                                             |
| atp1b3    | 0.306 | -3.266 | ATPase, Na <sup>+</sup> /K <sup>+</sup> transporting, beta 3 polypeptide (ATP1B3), mRNA. XM_945518                                      |
| stxbp5    | 0.306 | -3.269 | syntaxin binding protein 5 (tomosyn) (STXBP5), mRNA.                                                                                    |
| c14orf142 | 0.306 | -3.272 | chromosome 14 open reading frame 142 (C14orf142), mRNA.                                                                                 |
| mgc20255  | 0.306 | -3.272 | coiled-coil domain containing 97 (CCDC97), mRNA.                                                                                        |
| pvr       | 0.306 | -3.273 | poliovirus receptor (PVR), mRNA.                                                                                                        |

|           |       |        |                                                                                                                                                             |
|-----------|-------|--------|-------------------------------------------------------------------------------------------------------------------------------------------------------------|
| nfkbb1    | 0.305 | -3.275 | nuclear factor of kappa light polypeptide gene enhancer in B-cells inhibitor, beta (NFKBIB), transcript variant 1, mRNA.                                    |
| loc653086 | 0.305 | -3.276 | PREDICTED: similar to RAN-binding protein 2-like 1 isoform 2, transcript variant 6 (LOC653086), mRNA.                                                       |
| rn7sl1    | 0.305 | -3.281 | RNA, 7SL, cytoplasmic 1 (RN7SL1) on chromosome 14.                                                                                                          |
| golgb1    | 0.305 | -3.283 | golgi autoantigen, golgin subfamily b, macrogolgin (with transmembrane signal), 1 (GOLGB1), mRNA.                                                           |
| oxtr      | 0.304 | -3.284 | oxytocin receptor (OXTR), mRNA.                                                                                                                             |
| ttc3      | 0.304 | -3.287 | tetratricopeptide repeat domain 3 (TTC3), transcript variant 1, mRNA.                                                                                       |
| urod      | 0.304 | -3.288 | uroporphyrinogen decarboxylase (UROD), mRNA.                                                                                                                |
| loc649841 | 0.304 | -3.289 | PREDICTED: similar to protein immuno-reactive with anti-PTH polyclonal antibodies (LOC649841), mRNA.                                                        |
| blvrb     | 0.304 | -3.29  | biliverdin reductase B (flavin reductase (NADPH)) (BLVRB), mRNA.                                                                                            |
| tsta3     | 0.304 | -3.291 | tissue specific transplantation antigen P35B (TSTA3), mRNA.                                                                                                 |
| tmed1     | 0.304 | -3.294 | transmembrane emp24 protein transport domain containing 1 (TMED1), mRNA.                                                                                    |
| fam14a    | 0.303 | -3.295 | family with sequence similarity 14, member A (FAM14A), mRNA.                                                                                                |
| mrpl45    | 0.303 | -3.303 | mitochondrial ribosomal protein L45 (MRPL45), nuclear gene encoding mitochondrial protein, mRNA.                                                            |
| tubb4q    | 0.303 | -3.304 | tubulin, beta polypeptide 4, member Q (TUBB4Q), mRNA.                                                                                                       |
| naglu     | 0.303 | -3.304 | N-acetylglucosaminidase, alpha- (Sanfilippo disease IIIB) (NAGLU), mRNA.                                                                                    |
| fam36a    | 0.303 | -3.304 | family with sequence similarity 36, member A (FAM36A), mRNA.                                                                                                |
| hsd17b7   | 0.302 | -3.306 | hydroxysteroid (17-beta) dehydrogenase 7 (HSD17B7), mRNA.                                                                                                   |
| nfib      | 0.302 | -3.307 | nuclear factor I/B (NFIB), mRNA.                                                                                                                            |
| ubap2     | 0.302 | -3.313 | ubiquitin associated protein 2 (UBAP2), mRNA.                                                                                                               |
| morf4l1   | 0.302 | -3.313 | mortality factor 4 like 1 (MORF4L1), transcript variant 2, mRNA.                                                                                            |
| fth1      | 0.302 | -3.314 | ferritin, heavy polypeptide 1 (FTH1), mRNA.                                                                                                                 |
| acaa2     | 0.302 | -3.314 | acetyl-Coenzyme A acyltransferase 2 (mitochondrial 3-oxoacyl-Coenzyme A thiolase) (ACAA2), nuclear gene encoding mitochondrial protein, mRNA.               |
| sertad1   | 0.302 | -3.315 | SERTA domain containing 1 (SERTAD1), mRNA.                                                                                                                  |
| papss2    | 0.302 | -3.316 | 3'-phosphoadenosine 5'-phosphosulfate synthase 2 (PAPSS2), transcript variant 1, mRNA.                                                                      |
| adprhl2   | 0.302 | -3.317 | ADP-ribosylhydrolase like 2 (ADPRHL2), mRNA.                                                                                                                |
| mgc14376  | 0.301 | -3.317 | hypothetical protein MGC14376 (MGC14376), transcript variant 2, mRNA.                                                                                       |
| dyrk2     | 0.301 | -3.323 | dual-specificity tyrosine-(Y)-phosphorylation regulated kinase 2 (DYRK2), transcript variant 2, mRNA.                                                       |
| leng4     | 0.301 | -3.324 | leukocyte receptor cluster (LRC) member 4 (LENG4), mRNA.                                                                                                    |
| map7      | 0.301 | -3.327 | microtubule-associated protein 7 (MAP7), mRNA.                                                                                                              |
| tomm22    | 0.301 | -3.327 | translocase of outer mitochondrial membrane 22 homolog (yeast) (TOMM22), nuclear gene encoding mitochondrial protein, mRNA.                                 |
| npc1      | 0.3   | -3.328 | Niemann-Pick disease, type C1 (NPC1), mRNA.                                                                                                                 |
| ankfy1    | 0.3   | -3.331 | ankyrin repeat and FYVE domain containing 1 (ANKFY1), transcript variant 2, mRNA.                                                                           |
| tacc3     | 0.3   | -3.333 | transforming, acidic coiled-coil containing protein 3 (TACC3), mRNA.                                                                                        |
| ptges     | 0.299 | -3.341 | prostaglandin E synthase (PTGES), mRNA.                                                                                                                     |
| hspe1     | 0.299 | -3.343 | heat shock 10kDa protein 1 (chaperonin 10) (HSPE1), mRNA.                                                                                                   |
| apoc1     | 0.299 | -3.345 | apolipoprotein C-I (APOC1), mRNA.                                                                                                                           |
| nmi       | 0.299 | -3.346 | N-myc (and STAT) interactor (NMI), mRNA.                                                                                                                    |
| polr2j3   | 0.299 | -3.347 | RPB11b2alpha protein (POLR2J3), mRNA.                                                                                                                       |
| slc25a14  | 0.299 | -3.347 | solute carrier family 25 (mitochondrial carrier, brain), member 14 (SLC25A14), nuclear gene encoding mitochondrial protein, transcript variant short, mRNA. |

|           |       |                                                                                                                                                                                                         |
|-----------|-------|---------------------------------------------------------------------------------------------------------------------------------------------------------------------------------------------------------|
| hoxb5     | 0.298 | -3.352 homeo box B5 (HOXB5), mRNA.                                                                                                                                                                      |
| hadhb     | 0.298 | -3.353 hydroxyacyl-Coenzyme A dehydrogenase/3-ketoacyl-Coenzyme A thiolase/enoyl-Coenzyme A hydratase (trifunctional protein), beta subunit (HADHB), nuclear gene encoding mitochondrial protein, mRNA. |
| tm9sf4    | 0.298 | -3.354 transmembrane 9 superfamily protein member 4 (TM9SF4), mRNA.                                                                                                                                     |
| higd2a    | 0.298 | -3.355 HIG1 domain family, member 2A (HIGD2A), mRNA.                                                                                                                                                    |
| mgc2803   | 0.298 | -3.356 chromosome 19 open reading frame 43 (C19orf43), mRNA.                                                                                                                                            |
| syap1     | 0.297 | -3.362 synapse associated protein 1, SAP47 homolog (Drosophila) (SYAP1), mRNA.                                                                                                                          |
| dapk3     | 0.297 | -3.362 death-associated protein kinase 3 (DAPK3), mRNA.                                                                                                                                                 |
| hs.544637 | 0.297 | -3.362 xr14b10.x1 NCI_CGAP_Lu28 cDNA clone IMAGE:2760091 3, mRNA sequence                                                                                                                               |
| ctsl2     | 0.297 | -3.363 cathepsin L2 (CTSL2), mRNA.                                                                                                                                                                      |
| gprc5c    | 0.297 | -3.364 G protein-coupled receptor, family C, group 5, member C (GPRC5C), transcript variant 2, mRNA.                                                                                                    |
| sec11l3   | 0.297 | -3.364 SEC11 homolog C ( <i>S. cerevisiae</i> ) (SEC11C), mRNA.                                                                                                                                         |
| flj40504  | 0.297 | -3.366 hypothetical protein FLJ40504 (FLJ40504), mRNA.                                                                                                                                                  |
| nup214    | 0.297 | -3.369 nucleoporin 214kDa (NUP214), mRNA.                                                                                                                                                               |
| prss23    | 0.297 | -3.37 protease, serine, 23 (PRSS23), mRNA.                                                                                                                                                              |
| sc65      | 0.296 | -3.373 synaptonemal complex protein SC65 (SC65), mRNA.                                                                                                                                                  |
| mfhas1    | 0.296 | -3.373 malignant fibrous histiocytoma amplified sequence 1 (MFHAS1), mRNA.                                                                                                                              |
| ccdc58    | 0.296 | -3.373 coiled-coil domain containing 58 (CCDC58), mRNA.                                                                                                                                                 |
| slc25a13  | 0.296 | -3.374 solute carrier family 25, member 13 (citrin) (SLC25A13), mRNA.                                                                                                                                   |
| phlda3    | 0.296 | -3.374 pleckstrin homology-like domain, family A, member 3 (PHLDA3), mRNA.                                                                                                                              |
| c20orf31  | 0.296 | -3.374 ER degradation enhancer, mannosidase alpha-like 2 (EDEM2), mRNA.                                                                                                                                 |
| adck4     | 0.296 | -3.376 aarF domain containing kinase 4 (ADCK4), mRNA.                                                                                                                                                   |
| hspa9b    | 0.296 | -3.376 heat shock 70kDa protein 9B (mortalin-2) (HSPA9B), nuclear gene encoding mitochondrial protein, mRNA.                                                                                            |
| eno3      | 0.296 | -3.38 enolase 3 (beta, muscle) (ENO3), transcript variant 1, mRNA.                                                                                                                                      |
| npepps    | 0.296 | -3.381 aminopeptidase puromycin sensitive (NPEPPS), mRNA.                                                                                                                                               |
| fgf2      | 0.296 | -3.381 fibroblast growth factor 2 (basic) (FGF2), mRNA.                                                                                                                                                 |
| rbm34     | 0.295 | -3.393 RNA binding motif protein 34 (RBM34), mRNA.                                                                                                                                                      |
| tdg       | 0.294 | -3.396 thymine-DNA glycosylase (TDG), mRNA.                                                                                                                                                             |
| prkca     | 0.294 | -3.402 protein kinase C, alpha (PRKCA), mRNA.                                                                                                                                                           |
| h2afy     | 0.294 | -3.402 H2A histone family, member Y (H2AFY), transcript variant 2, mRNA.                                                                                                                                |
| fthl3     | 0.294 | -3.403 ferritin, heavy polypeptide-like 3 (FTHL3) on chromosome 2.                                                                                                                                      |
| hs.553187 | 0.294 | -3.405 cDNA FLJ45619 fis, clone BRTHA3027318                                                                                                                                                            |
| dusp3     | 0.294 | -3.406 dual specificity phosphatase 3 (vaccinia virus phosphatase VH1-related) (DUSP3), mRNA.                                                                                                           |
| pkd2      | 0.294 | -3.407 polycystic kidney disease 2 (autosomal dominant) (PKD2), mRNA.                                                                                                                                   |
| ythdf2    | 0.293 | -3.41 YTH domain family, member 2 (YTHDF2), mRNA.                                                                                                                                                       |
| loc723972 | 0.293 | -3.41 hepatopoietin PCn127 (LOC723972) on chromosome 15.                                                                                                                                                |
| hs.137971 | 0.293 | -3.41 AV737943 CB cDNA clone CBDAEG06 5, mRNA sequence                                                                                                                                                  |
| hs.546710 | 0.293 | -3.411 cDNA FLJ26122 fis, clone SYN00634                                                                                                                                                                |
| wdr25     | 0.293 | -3.416 WD repeat domain 25 (WDR25), mRNA.                                                                                                                                                               |
| u1snrnpb  | 0.293 | -3.417 U11/U12 snRNP 35K (U1SNRNPBP), transcript variant 3, mRNA.                                                                                                                                       |
| mgc2747   | 0.293 | -3.419 hypothetical protein MGC2747 (MGC2747), mRNA.                                                                                                                                                    |
| endogl1   | 0.292 | -3.421 endonuclease G-like 1 (ENDOGL1), mRNA.                                                                                                                                                           |

|           |       |        |                                                                                                                       |
|-----------|-------|--------|-----------------------------------------------------------------------------------------------------------------------|
| pon3      | 0.292 | -3.421 | paraoxonase 3 (PON3), mRNA.                                                                                           |
| kynu      | 0.292 | -3.422 | kynureninase (L-kynurenine hydrolase) (KYNU), transcript variant 1, mRNA.                                             |
| fhl1      | 0.292 | -3.423 | four and a half LIM domains 1 (FHL1), mRNA.                                                                           |
| fstl3     | 0.292 | -3.426 | follistatin-like 3 (secreted glycoprotein) (FSTL3), mRNA.                                                             |
| fjx1      | 0.292 | -3.427 | four jointed box 1 (Drosophila) (FJX1), mRNA.                                                                         |
| fthl11    | 0.292 | -3.429 | ferritin, heavy polypeptide-like 11 (FTHL11) on chromosome 8.                                                         |
| b4galt1   | 0.291 | -3.431 | UDP-Gal:betaGlcNAc beta 1,4- galactosyltransferase, polypeptide 1 (B4GALT1), mRNA.                                    |
| serpine2  | 0.291 | -3.434 | serpin peptidase inhibitor, clade E (nexin, plasminogen activator inhibitor type 1), member 2 (SERPINE2), mRNA.       |
| vps18     | 0.291 | -3.435 | vacuolar protein sorting 18 homolog (S. cerevisiae) (VPS18), mRNA.                                                    |
| rpl14     | 0.291 | -3.436 | ribosomal protein L14 (RPL14), transcript variant 1, mRNA.                                                            |
| hnrpl     | 0.291 | -3.438 | heterogeneous nuclear ribonucleoprotein L (HNRPL), transcript variant 2, mRNA.                                        |
| c16orf57  | 0.291 | -3.438 | chromosome 16 open reading frame 57 (C16orf57), mRNA.                                                                 |
| ak2       | 0.291 | -3.439 | adenylate kinase 2 (AK2), transcript variant AK2A, mRNA.                                                              |
| foxc1     | 0.291 | -3.441 | forkhead box C1 (FOXC1), mRNA.                                                                                        |
| mgc18216  | 0.29  | -3.444 | PREDICTED: hypothetical protein MGC18216 (MGC18216), mRNA.                                                            |
| f2rl1     | 0.29  | -3.444 | coagulation factor II (thrombin) receptor-like 1 (F2RL1), mRNA.                                                       |
| ckap1     | 0.29  | -3.448 | cytoskeleton associated protein 1 (CKAP1), mRNA.                                                                      |
| sptlc1    | 0.29  | -3.449 | serine palmitoyltransferase, long chain base subunit 1 (SPTLC1), transcript variant 2, mRNA.                          |
| sync1     | 0.29  | -3.449 | syncoilin, intermediate filament 1 (SYNC1), mRNA.                                                                     |
| dio2      | 0.29  | -3.45  | deiodinase, iodothyronine, type II (DIO2), transcript variant 1, mRNA.                                                |
| loc653328 | 0.289 | -3.455 | PREDICTED: similar to ribosomal protein S27 (LOC653328), mRNA.                                                        |
| sat2      | 0.289 | -3.457 | spermidine/spermine N1-acetyltransferase 2 (SAT2), mRNA.                                                              |
| flj13391  | 0.289 | -3.457 | transmembrane protein 166 (TMEM166), mRNA.                                                                            |
| fam62a    | 0.289 | -3.462 | family with sequence similarity 62 (C2 domain containing), member A (FAM62A), mRNA.                                   |
| derl2     | 0.289 | -3.462 | Der1-like domain family, member 2 (DERL2), mRNA.                                                                      |
| tmed2     | 0.289 | -3.462 | transmembrane emp24 domain trafficking protein 2 (TMED2), mRNA.                                                       |
| edf1      | 0.289 | -3.465 | endothelial differentiation-related factor 1 (EDF1), transcript variant alpha, mRNA.                                  |
| cd99l2    | 0.288 | -3.466 | CD99 molecule-like 2 (CD99L2), transcript variant 3, mRNA.                                                            |
| slc38a6   | 0.288 | -3.467 | solute carrier family 38, member 6 (SLC38A6), mRNA.                                                                   |
| serpinh1  | 0.288 | -3.467 | serpin peptidase inhibitor, clade H (heat shock protein 47), member 1, (collagen binding protein 1) (SERPINH1), mRNA. |
| loc440732 | 0.288 | -3.471 | PREDICTED: similar to 40S ribosomal protein S7 (S8) (LOC440732), mRNA.                                                |
| ube1      | 0.287 | -3.482 | ubiquitin-activating enzyme E1 (UBE1), transcript variant 2, mRNA.                                                    |
| flj20254  | 0.287 | -3.482 | hypothetical protein FLJ20254 (FLJ20254), mRNA.                                                                       |
| ciao1     | 0.287 | -3.483 | cytosolic iron-sulfur protein assembly 1 homolog (S. cerevisiae) (CIAO1), mRNA.                                       |
| c14orf102 | 0.287 | -3.485 | chromosome 14 open reading frame 102 (C14orf102), transcript variant 2, mRNA.                                         |
| timp4     | 0.287 | -3.486 | TIMP metalloproteinase inhibitor 4 (TIMP4), mRNA.                                                                     |
| keap1     | 0.287 | -3.487 | kelch-like ECH-associated protein 1 (KEAP1), transcript variant 2, mRNA.                                              |
| cited2    | 0.287 | -3.488 | Cbp/p300-interacting transactivator, with Glu/Asp-rich carboxy-terminal domain, 2 (CITED2), mRNA.                     |
| calu      | 0.286 | -3.491 | calumenin (CALU), mRNA.                                                                                               |
| ier5      | 0.286 | -3.491 | immediate early response 5 (IER5), mRNA.                                                                              |
| tmpit     | 0.286 | -3.495 | transmembrane protein 120A (TMEM120A), mRNA.                                                                          |
| hebp1     | 0.286 | -3.496 | heme binding protein 1 (HEBP1), mRNA.                                                                                 |



|           |       |        |                                                                                                                      |
|-----------|-------|--------|----------------------------------------------------------------------------------------------------------------------|
| rps19     | 0.286 | -3.496 | ribosomal protein S19 (RPS19), mRNA.                                                                                 |
| eif4e2    | 0.286 | -3.496 | eukaryotic translation initiation factor 4E family member 2 (EIF4E2), mRNA.                                          |
| usp49     | 0.286 | -3.5   | ubiquitin specific peptidase 49 (USP49), mRNA.                                                                       |
| h3f3b     | 0.286 | -3.501 | H3 histone, family 3B (H3.3B) (H3F3B), mRNA.                                                                         |
| exosc9    | 0.286 | -3.502 | exosome component 9 (EXOSC9), mRNA.                                                                                  |
| bcyrn1    | 0.285 | -3.504 | brain cytoplasmic RNA 1, Bc1 analog (mouse) (BCYRN1) on chromosome 2.                                                |
| ranbp1    | 0.285 | -3.505 | RAN binding protein 1 (RANBP1), mRNA.                                                                                |
| c10orf9   | 0.285 | -3.507 | cyclin Y (CCNY), transcript variant 2, mRNA.                                                                         |
| arhgap21  | 0.285 | -3.509 | Rho GTPase activating protein 21 (ARHGAP21), mRNA.                                                                   |
| rsad1     | 0.285 | -3.511 | radical S-adenosyl methionine domain containing 1 (RSAD1), mRNA.                                                     |
| snf8      | 0.284 | -3.516 | SNF8, ESCRT-II complex subunit, homolog (S. cerevisiae) (SNF8), mRNA.                                                |
| slc25a11  | 0.284 | -3.517 | solute carrier family 25 (mitochondrial carrier; oxoglutarate carrier), member 11 (SLC25A11), mRNA.                  |
| ptpns1    | 0.284 | -3.523 | protein tyrosine phosphatase, non-receptor type substrate 1 (PTPNS1), mRNA.                                          |
| slit3     | 0.283 | -3.531 | slit homolog 3 (Drosophila) (SLIT3), mRNA.                                                                           |
| retsat    | 0.283 | -3.531 | retinol saturase (all-trans-retinol 13,14-reductase) (RETSAT), mRNA.                                                 |
| mrpl50    | 0.283 | -3.532 | mitochondrial ribosomal protein L50 (MRPL50), nuclear gene encoding mitochondrial protein, mRNA.                     |
| cyp24a1   | 0.283 | -3.532 | cytochrome P450, family 24, subfamily A, polypeptide 1 (CYP24A1), nuclear gene encoding mitochondrial protein, mRNA. |
| mtmr15    | 0.283 | -3.534 | myotubularin related protein 15 (MTMR15), mRNA.                                                                      |
| loc389541 | 0.283 | -3.536 | similar to CG14977-PA (LOC389541), mRNA.                                                                             |
| sqstm1    | 0.282 | -3.542 | sequestosome 1 (SQSTM1), mRNA.                                                                                       |
| eif1b     | 0.282 | -3.547 | eukaryotic translation initiation factor 1B (EIF1B), mRNA.                                                           |
| dstn      | 0.282 | -3.547 | destrin (actin depolymerizing factor) (DSTN), transcript variant 1, mRNA.                                            |
| sdc4      | 0.282 | -3.55  | syndecan 4 (SDC4), mRNA.                                                                                             |
| fundc1    | 0.281 | -3.554 | FUN14 domain containing 1 (FUNDC1), mRNA.                                                                            |
| lrpap1    | 0.281 | -3.559 | low density lipoprotein receptor-related protein associated protein 1 (LRPAP1), mRNA.                                |
| tnfrsf10d | 0.281 | -3.559 | tumor necrosis factor receptor superfamily, member 10d, decoy with truncated death domain (TNFRSF10D), mRNA.         |
| dusp19    | 0.281 | -3.56  | dual specificity phosphatase 19 (DUSP19), mRNA.                                                                      |
| iqgap1    | 0.281 | -3.564 | IQ motif containing GTPase activating protein 1 (IQGAP1), mRNA.                                                      |
| ndst1     | 0.281 | -3.565 | N-deacetylase/N-sulfotransferase (heparan glucosaminyl) 1 (NDST1), mRNA.                                             |
| atp6ap2   | 0.28  | -3.571 | ATPase, H <sup>+</sup> transporting, lysosomal accessory protein 2 (ATP6AP2), mRNA.                                  |
| rpl23     | 0.28  | -3.576 | ribosomal protein L23 (RPL23), mRNA.                                                                                 |
| fkbp2     | 0.279 | -3.581 | FK506 binding protein 2, 13kDa (FKBP2), transcript variant 1, mRNA.                                                  |
| polr2h    | 0.279 | -3.582 | polymerase (RNA) II (DNA directed) polypeptide H (POLR2H), mRNA.                                                     |
| c16orf28  | 0.279 | -3.582 | chromosome 16 open reading frame 28 (C16orf28), mRNA.                                                                |
| lmcd1     | 0.279 | -3.583 | LIM and cysteine-rich domains 1 (LMCD1), mRNA.                                                                       |
| fam98a    | 0.279 | -3.586 | family with sequence similarity 98, member A (FAM98A), mRNA.                                                         |
| eif3s10   | 0.279 | -3.59  | eukaryotic translation initiation factor 3, subunit 10 theta, 150/170kDa (EIF3S10), mRNA.                            |
| loc644799 | 0.278 | -3.592 | PREDICTED: hypothetical protein LOC644799, transcript variant 1 (LOC644799), mRNA.                                   |
| ube4b     | 0.278 | -3.593 | ubiquitination factor E4B (UFD2 homolog, yeast) (UBE4B), mRNA.                                                       |
| hapln3    | 0.278 | -3.595 | hyaluronan and proteoglycan link protein 3 (HAPLN3), mRNA.                                                           |
| znf503    | 0.278 | -3.595 | zinc finger protein 503 (ZNF503), mRNA.                                                                              |
| tm7sf3    | 0.278 | -3.596 | transmembrane 7 superfamily member 3 (TM7SF3), mRNA.                                                                 |

|           |       |        |                                                                                                                   |
|-----------|-------|--------|-------------------------------------------------------------------------------------------------------------------|
| csrp1     | 0.278 | -3.6   | cysteine and glycine-rich protein 1 (CSRP1), mRNA.                                                                |
| antxr1    | 0.278 | -3.601 | anthrax toxin receptor 1 (ANTXR1), transcript variant 2, mRNA.                                                    |
| polr2g    | 0.277 | -3.606 | polymerase (RNA) II (DNA directed) polypeptide G (POLR2G), mRNA.                                                  |
| lrp10     | 0.277 | -3.611 | low density lipoprotein receptor-related protein 10 (LRP10), mRNA.                                                |
| lpp       | 0.276 | -3.617 | LIM domain containing preferred translocation partner in lipoma (LPP), mRNA.                                      |
| arid5b    | 0.276 | -3.618 | AT rich interactive domain 5B (MRF1-like) (ARID5B), mRNA.                                                         |
| gnl3      | 0.276 | -3.625 | guanine nucleotide binding protein-like 3 (nucleolar) (GNL3), transcript variant 2, mRNA.                         |
| ccbe1     | 0.276 | -3.625 | collagen and calcium binding EGF domains 1 (CCBE1), mRNA.                                                         |
| phpt1     | 0.276 | -3.625 | phosphohistidine phosphatase 1 (PHPT1), mRNA.                                                                     |
| tmem185b  | 0.276 | -3.626 | transmembrane protein 185B (TMEM185B) on chromosome 2.                                                            |
| sars2     | 0.276 | -3.627 | seryl-tRNA synthetase 2, mitochondrial (SARS2), mRNA.                                                             |
| mcm4      | 0.276 | -3.628 | MCM4 minichromosome maintenance deficient 4 ( <i>S. cerevisiae</i> ) (MCM4), transcript variant 1, mRNA.          |
| tm4sf20   | 0.275 | -3.633 | transmembrane 4 L six family member 20 (TM4SF20), mRNA.                                                           |
| prtfdc1   | 0.275 | -3.635 | phosphoribosyl transferase domain containing 1 (PRTFDC1), mRNA.                                                   |
| cdk4      | 0.275 | -3.639 | cyclin-dependent kinase 4 (CDK4), mRNA.                                                                           |
| galnt11   | 0.274 | -3.643 | UDP-N-acetyl-alpha-D-galactosamine:polypeptide N-acetylgalactosaminyltransferase 11 (GalNAc-T11) (GALNT11), mRNA. |
| sfrs1     | 0.274 | -3.644 | splicing factor, arginine/serine-rich 1 (splicing factor 2, alternate splicing factor) (SFRS1), mRNA.             |
| mgc72080  | 0.274 | -3.644 | MGC72080 pseudogene (MGC72080) on chromosome 7.                                                                   |
| pqbp1     | 0.274 | -3.65  | polyglutamine binding protein 1 (PQBP1), transcript variant 1, mRNA.                                              |
| tmem17    | 0.274 | -3.652 | transmembrane protein 17 (TMEM17), mRNA.                                                                          |
| psme2     | 0.274 | -3.653 | proteasome (prosome, macropain) activator subunit 2 (PA28 beta) (PSME2), mRNA.                                    |
| glrx      | 0.273 | -3.657 | glutaredoxin (thioltransferase) (GLRX), mRNA.                                                                     |
| loc442578 | 0.273 | -3.657 | similar to Cohesin subunit SA-3 (Stromal antigen 3) (Stromalin 3) (SCC3 homolog 3) (LOC442578), mRNA.             |
| pde7b     | 0.273 | -3.657 | phosphodiesterase 7B (PDE7B), mRNA.                                                                               |
| foxf2     | 0.273 | -3.658 | forkhead box F2 (FOXF2), mRNA.                                                                                    |
| set       | 0.272 | -3.671 | SET translocation (myeloid leukemia-associated) (SET), mRNA.                                                      |
| tmepai    | 0.272 | -3.676 | transmembrane, prostate androgen induced RNA (TMEPAI), transcript variant 4, mRNA.                                |
| ubiad1    | 0.272 | -3.679 | UbiA prenyltransferase domain containing 1 (UBIAD1), mRNA.                                                        |
| nomo1     | 0.272 | -3.681 | NODAL modulator 1 (NOMO1), mRNA.                                                                                  |
| rpl7a     | 0.272 | -3.681 | ribosomal protein L7a (RPL7A), mRNA.                                                                              |
| vamp2     | 0.271 | -3.691 | vesicle-associated membrane protein 2 (synaptobrevin 2) (VAMP2), mRNA.                                            |
| olfml2a   | 0.271 | -3.696 | olfactomedin-like 2A (OLFML2A), mRNA.                                                                             |
| creb1     | 0.27  | -3.698 | cAMP responsive element binding protein 1 (CREB1), transcript variant A, mRNA.                                    |
| bles03    | 0.27  | -3.701 | chromosome 11 open reading frame 68 (C11orf68), mRNA.                                                             |
| loc283412 | 0.269 | -3.712 | PREDICTED: similar to 60S ribosomal protein L29 (Cell surface heparin binding protein HIP) (LOC283412), mRNA.     |
| hs.554507 | 0.269 | -3.713 | primary neuroblastoma cDNA, clone:Nbla10527, full insert sequence                                                 |
| gdi2      | 0.269 | -3.719 | GDP dissociation inhibitor 2 (GDI2), mRNA.                                                                        |
| rbbp7     | 0.269 | -3.72  | retinoblastoma binding protein 7 (RBBP7), mRNA.                                                                   |
| kiaa1967  | 0.269 | -3.723 | KIAA1967 (KIAA1967), transcript variant 1, mRNA.                                                                  |
| rab13     | 0.268 | -3.725 | RAB13, member RAS oncogene family (RAB13), mRNA.                                                                  |
| ppgb      | 0.268 | -3.731 | protective protein for beta-galactosidase (galactosialidosis) (PPGB), mRNA.                                       |
| c21orf63  | 0.268 | -3.738 | chromosome 21 open reading frame 63 (C21orf63), mRNA.                                                             |

|             |       |        |                                                                                                                        |
|-------------|-------|--------|------------------------------------------------------------------------------------------------------------------------|
| hs.524171   | 0.267 | -3.743 | cDNA clone IMAGE:5264735                                                                                               |
| nploc4      | 0.267 | -3.744 | nuclear protein localization 4 homolog ( <i>S. cerevisiae</i> ) (NPLOC4), mRNA.                                        |
| loc440737   | 0.267 | -3.744 | PREDICTED: similar to 60S ribosomal protein L35 (LOC440737), mRNA.                                                     |
| xrcc2       | 0.267 | -3.745 | X-ray repair complementing defective repair in Chinese hamster cells 2 (XRCC2), mRNA.                                  |
| hspc111     | 0.267 | -3.751 | hypothetical protein HSPC111 (HSPC111), mRNA.                                                                          |
| tle1        | 0.267 | -3.752 | transducin-like enhancer of split 1 (E(sp1) homolog, <i>Drosophila</i> ) (TLE1), mRNA.                                 |
| sema3e      | 0.266 | -3.762 | sema domain, immunoglobulin domain (Ig), short basic domain, secreted, (semaphorin) 3E (SEMA3E), mRNA.                 |
| lrrfip1     | 0.265 | -3.768 | leucine rich repeat (in FLII) interacting protein 1 (LRRFIP1), mRNA.                                                   |
| c14orf166   | 0.265 | -3.769 | chromosome 14 open reading frame 166 (C14orf166), mRNA.                                                                |
| tpp1        | 0.265 | -3.77  | tripeptidyl peptidase I (TPP1), mRNA.                                                                                  |
| immt        | 0.265 | -3.77  | inner membrane protein, mitochondrial (mitofilin) (IMMT), mRNA.                                                        |
| ns4atp2     | 0.265 | -3.772 | SAP30-like (SAP30L), mRNA.                                                                                             |
| slc35e1     | 0.264 | -3.786 | solute carrier family 35, member E1 (SLC35E1), mRNA.                                                                   |
| mgc2749     | 0.264 | -3.789 | chromosome 19 open reading frame 50 (C19orf50), mRNA.                                                                  |
| tmem156     | 0.264 | -3.79  | transmembrane protein 156 (TMEM156), mRNA.                                                                             |
| cdh4        | 0.264 | -3.79  | cadherin 4, type 1, R-cadherin (retinal) (CDH4), mRNA.                                                                 |
| tor1a       | 0.264 | -3.793 | torsin family 1, member A (torsin A) (TOR1A), mRNA.                                                                    |
| hak         | 0.263 | -3.798 | heart alpha-kinase (HAK), mRNA.                                                                                        |
| mgc29891    | 0.263 | -3.799 | hypothetical protein MGC29891 (MGC29891), mRNA.                                                                        |
| rhoc        | 0.263 | -3.802 | ras homolog gene family, member C (RHOC), mRNA.                                                                        |
| cct3        | 0.263 | -3.803 | chaperonin containing TCP1, subunit 3 (gamma) (CCT3), transcript variant 1, mRNA.                                      |
| slc16a12    | 0.263 | -3.805 | solute carrier family 16, member 12 (monocarboxylic acid transporter 12) (SLC16A12), mRNA.                             |
| kdelc2      | 0.262 | -3.811 | KDEL (Lys-Asp-Glu-Leu) containing 2 (KDEL2), mRNA.                                                                     |
| ptdss2      | 0.262 | -3.814 | phosphatidylserine synthase 2 (PTDSS2), mRNA.                                                                          |
| dkfzp564k14 | 0.261 | -3.825 | implantation-associated protein (DKFZp564K142), mRNA.                                                                  |
| fkbp14      | 0.261 | -3.826 | FK506 binding protein 14, 22 kDa (FKBP14), mRNA.                                                                       |
| fthl12      | 0.261 | -3.826 | ferritin, heavy polypeptide-like 12 (FTHL12) on chromosome 9.                                                          |
| dmn         | 0.261 | -3.834 | desmuslin (DMN), transcript variant A, mRNA.                                                                           |
| loc651913   | 0.261 | -3.836 | PREDICTED: hypothetical protein LOC651913 (LOC651913), mRNA.                                                           |
| slc39a10    | 0.261 | -3.837 | solute carrier family 39 (zinc transporter), member 10 (SLC39A10), mRNA.                                               |
| calr        | 0.26  | -3.846 | calreticulin (CALR), mRNA.                                                                                             |
| gpr1        | 0.26  | -3.848 | G protein-coupled receptor 1 (GPR1), mRNA.                                                                             |
| bloc1s1     | 0.26  | -3.85  | biogenesis of lysosome-related organelles complex-1, subunit 1 (BLOC1S1), mRNA.                                        |
| mrps21      | 0.26  | -3.852 | mitochondrial ribosomal protein S21 (MRPS21), nuclear gene encoding mitochondrial protein, transcript variant 2, mRNA. |
| tatdn2      | 0.259 | -3.863 | TatD DNase domain containing 2 (TATDN2), mRNA.                                                                         |
| ssbp1       | 0.259 | -3.864 | single-stranded DNA binding protein 1 (SSBP1), mRNA.                                                                   |
| frg1        | 0.259 | -3.864 | FSHD region gene 1 (FRG1), mRNA.                                                                                       |
| ccnb1       | 0.259 | -3.868 | cyclin B1 (CCNB1), mRNA.                                                                                               |
| igfbp3      | 0.259 | -3.868 | insulin-like growth factor binding protein 3 (IGFBP3), transcript variant 1, mRNA.                                     |
| muc13       | 0.258 | -3.869 | mucin 13, cell surface associated (MUC13), mRNA.                                                                       |
| ccr6        | 0.258 | -3.872 | chemokine (C-C motif) receptor 6 (CCR6), transcript variant 2, mRNA.                                                   |
| tdp1        | 0.258 | -3.874 | tyrosyl-DNA phosphodiesterase 1 (TDP1), transcript variant 1, mRNA.                                                    |

|            |       |        |                                                                                                      |
|------------|-------|--------|------------------------------------------------------------------------------------------------------|
| bcl3       | 0.258 | -3.881 | B-cell CLL/lymphoma 3 (BCL3), mRNA.                                                                  |
| timm9      | 0.257 | -3.892 | translocase of inner mitochondrial membrane 9 homolog (yeast) (TIMM9), mRNA.                         |
| dtwd2      | 0.256 | -3.906 | DTW domain containing 2 (DTWD2), mRNA.                                                               |
| loc653314  | 0.256 | -3.906 | PREDICTED: similar to ribosomal protein L19, transcript variant 5 (LOC653314), mRNA.                 |
| mdc1       | 0.256 | -3.908 | mediator of DNA damage checkpoint 1 (MDC1), mRNA.                                                    |
| ociad1     | 0.256 | -3.909 | OCIA domain containing 1 (OCIAD1), mRNA.                                                             |
| gabrb3     | 0.255 | -3.916 | gamma-aminobutyric acid (GABA) A receptor, beta 3 (GABRB3), transcript variant 1, mRNA.              |
| c20orf29   | 0.255 | -3.92  | chromosome 20 open reading frame 29 (C20orf29), mRNA.                                                |
| znf313     | 0.255 | -3.921 | zinc finger protein 313 (ZNF313), mRNA.                                                              |
| dusp14     | 0.255 | -3.922 | dual specificity phosphatase 14 (DUSP14), mRNA.                                                      |
| hspc268    | 0.255 | -3.928 | hypothetical protein HSPC268 (HSPC268), mRNA.                                                        |
| mtif3      | 0.254 | -3.94  | mitochondrial translational initiation factor 3 (MTIF3), mRNA.                                       |
| ergic1     | 0.253 | -3.956 | endoplasmic reticulum-golgi intermediate compartment (ERGIC) 1 (ERGIC1), transcript variant 2, mRNA. |
| cdk6       | 0.253 | -3.956 | cyclin-dependent kinase 6 (CDK6), mRNA.                                                              |
| pygl       | 0.253 | -3.957 | phosphorylase, glycogen; liver (Hers disease, glycogen storage disease type VI) (PYGL), mRNA.        |
| c6orf115   | 0.252 | -3.963 | PREDICTED: chromosome 6 open reading frame 115 (C6orf115), mRNA.                                     |
| raet1g     | 0.252 | -3.963 | retinoic acid early transcript 1G (RAET1G), mRNA.                                                    |
| fam119a    | 0.252 | -3.966 | family with sequence similarity 119, member A (FAM119A), mRNA.                                       |
| alpp       | 0.252 | -3.967 | alkaline phosphatase, placental (Regan isozyme) (ALPP), mRNA.                                        |
| stom       | 0.251 | -3.979 | stomatin (STOM), transcript variant 1, mRNA.                                                         |
| hla-a      | 0.251 | -3.98  | major histocompatibility complex, class I, A (HLA-A), mRNA.                                          |
| eif4g2     | 0.251 | -3.986 | eukaryotic translation initiation factor 4 gamma, 2 (EIF4G2), mRNA.                                  |
| fthl8      | 0.251 | -3.991 | ferritin, heavy polypeptide-like 8 (FTHL8) on chromosome X.                                          |
| clcf1      | 0.25  | -3.994 | cardiotrophin-like cytokine factor 1 (CLCF1), mRNA.                                                  |
| cxorf26    | 0.249 | -4.013 | chromosome X open reading frame 26 (CXorf26), mRNA.                                                  |
| c15orf48   | 0.249 | -4.021 | chromosome 15 open reading frame 48 (C15orf48), transcript variant 1, mRNA.                          |
| gabra5     | 0.248 | -4.027 | gamma-aminobutyric acid (GABA) A receptor, alpha 5 (GABRA5), mRNA.                                   |
| hs.534061  | 0.247 | -4.044 | full-length cDNA clone XCL0BB001ZD04 of Neuroblastoma of (human)                                     |
| msc        | 0.246 | -4.058 | musculin (activated B-cell factor-1) (MSC), mRNA.                                                    |
| hspa2      | 0.246 | -4.059 | heat shock 70kDa protein 2 (HSPA2), mRNA.                                                            |
| loc399900  | 0.244 | -4.09  | hypothetical gene supported by AK093779 (LOC399900), mRNA.                                           |
| ltv1       | 0.243 | -4.108 | LTV1 homolog (S. cerevisiae) (LTV1), mRNA.                                                           |
| crip1      | 0.243 | -4.117 | cysteine-rich protein 1 (intestinal) (CRIP1), mRNA.                                                  |
| c17orf79   | 0.242 | -4.139 | chromosome 17 open reading frame 79 (C17orf79), mRNA.                                                |
| pappa      | 0.241 | -4.145 | pregnancy-associated plasma protein A, pappalysin 1 (PAPPA), mRNA.                                   |
| hist2h2aa3 | 0.241 | -4.153 | histone cluster 2, H2aa3 (HIST2H2AA3), mRNA.                                                         |
| csrp2      | 0.24  | -4.161 | cysteine and glycine-rich protein 2 (CSRP2), mRNA.                                                   |
| pdc7       | 0.24  | -4.164 | programmed cell death 7 (PDCD7), mRNA.                                                               |
| tspan3     | 0.24  | -4.17  | tetraspanin 3 (TSPAN3), transcript variant 1, mRNA.                                                  |
| c5orf28    | 0.238 | -4.195 | chromosome 5 open reading frame 28 (C5orf28), mRNA.                                                  |
| nlrp8      | 0.238 | -4.208 | NLR family, pyrin domain containing 8 (NLRP8), mRNA.                                                 |
| sar1a      | 0.238 | -4.21  | SAR1 gene homolog A (S. cerevisiae) (SAR1A), mRNA.                                                   |

|           |       |                                                                                                                            |
|-----------|-------|----------------------------------------------------------------------------------------------------------------------------|
| nt5dc2    | 0.237 | -4.218 5'-nucleotidase domain containing 2 (NT5DC2), mRNA.                                                                 |
| znf486    | 0.237 | -4.225 PREDICTED: zinc finger protein 486 (ZNF486), mRNA.                                                                  |
| becn1     | 0.237 | -4.226 beclin 1 (coiled-coil, myosin-like BCL2 interacting protein) (BECN1), mRNA.                                         |
| hs.564109 | 0.236 | -4.239 AGENCOURT_8673490 Lupski_sciatic_nerve cDNA clone IMAGE:6199918 5, mRNA sequence                                    |
| fat       | 0.236 | -4.24 FAT tumor suppressor homolog 1 (Drosophila) (FAT), mRNA.                                                             |
| ahnak     | 0.235 | -4.255 AHNAK nucleoprotein (AHNAK), transcript variant 2, mRNA.                                                            |
| col4a2    | 0.235 | -4.256 collagen, type IV, alpha 2 (COL4A2), mRNA.                                                                          |
| ndufb10   | 0.235 | -4.258 NADH dehydrogenase (ubiquinone) 1 beta subcomplex, 10, 22kDa (NDUFB10), mRNA.                                       |
| col5a1    | 0.235 | -4.261 collagen, type V, alpha 1 (COL5A1), mRNA.                                                                           |
| loc729603 | 0.234 | -4.266 calcium binding protein P22 pseudogene (LOC729603) on chromosome 6.                                                 |
| nutf2     | 0.234 | -4.28 nuclear transport factor 2 (NUTF2), mRNA.                                                                            |
| ncoa5     | 0.232 | -4.301 nuclear receptor coactivator 5 (NCOA5), mRNA.                                                                       |
| c20orf3   | 0.232 | -4.304 chromosome 20 open reading frame 3 (C20orf3), mRNA.                                                                 |
| baspl     | 0.232 | -4.315 brain abundant, membrane attached signal protein 1 (BASP1), mRNA.                                                   |
| decr1     | 0.23  | -4.356 2,4-dienoyl CoA reductase 1, mitochondrial (DECR1), nuclear gene encoding mitochondrial protein, mRNA.              |
| osgin1    | 0.228 | -4.378 oxidative stress induced growth inhibitor 1 (OSGIN1), transcript variant 1, mRNA.                                   |
| il10      | 0.228 | -4.384 interleukin 10 (IL10), mRNA.                                                                                        |
| hist1h2bk | 0.228 | -4.39 histone cluster 1, H2bk (HIST1H2BK), mRNA.                                                                           |
| ncor2     | 0.228 | -4.394 nuclear receptor co-repressor 2 (NCOR2), transcript variant 1, mRNA.                                                |
| hhex      | 0.227 | -4.397 hematopoietically expressed homeobox (HHEX), mRNA.                                                                  |
| znf69     | 0.227 | -4.401 zinc finger protein 69 (ZNF69), mRNA.                                                                               |
| pvr13     | 0.227 | -4.404 poliovirus receptor-related 3 (PVRL3), mRNA.                                                                        |
| rab3b     | 0.227 | -4.407 RAB3B, member RAS oncogene family (RAB3B), mRNA.                                                                    |
| zmat3     | 0.226 | -4.431 zinc finger, matrin type 3 (ZMAT3), transcript variant 2, mRNA.                                                     |
| psmc5     | 0.225 | -4.437 proteasome (prosome, macropain) 26S subunit, ATPase, 5 (PSMC5), mRNA.                                               |
| sox4      | 0.225 | -4.444 SRY (sex determining region Y)-box 4 (SOX4), mRNA.                                                                  |
| strap     | 0.225 | -4.444 serine/threonine kinase receptor associated protein (STRAP), mRNA.                                                  |
| ube2g2    | 0.225 | -4.445 ubiquitin-conjugating enzyme E2G 2 (UBC7 homolog, yeast) (UBE2G2), transcript variant 2, mRNA.                      |
| fahd1     | 0.224 | -4.457 fumarylacetoacetate hydrolase domain containing 1 (FAHD1), transcript variant 2, mRNA.                              |
| gcn111    | 0.224 | -4.465 GCN1 general control of amino-acid synthesis 1-like 1 (yeast) (GCN1L1), mRNA.                                       |
| mgc4093   | 0.222 | -4.495 hypothetical protein MGC4093 (MGC4093), mRNA.                                                                       |
| c3orf59   | 0.221 | -4.521 chromosome 3 open reading frame 59 (C3orf59), mRNA.                                                                 |
| sgk       | 0.221 | -4.533 serum/glucocorticoid regulated kinase (SGK), mRNA.                                                                  |
| rpl23a    | 0.221 | -4.535 ribosomal protein L23a (RPL23A), mRNA.                                                                              |
| eid2b     | 0.219 | -4.573 EP300 interacting inhibitor of differentiation 2B (EID2B), mRNA.                                                    |
| cirbp     | 0.217 | -4.611 cold inducible RNA binding protein (CIRBP), mRNA.                                                                   |
| col5a2    | 0.215 | -4.655 collagen, type V, alpha 2 (COL5A2), mRNA.                                                                           |
| mnt       | 0.214 | -4.663 MAX binding protein (MNT), mRNA.                                                                                    |
| lrp       | 0.214 | -4.672 leukocyte-derived arginine aminopeptidase (LRAP), mRNA.                                                             |
| cfdp1     | 0.214 | -4.674 craniofacial development protein 1 (CFDP1), mRNA.                                                                   |
| mrpl38    | 0.213 | -4.688 mitochondrial ribosomal protein L38 (MRPL38), nuclear gene encoding mitochondrial protein, mRNA.                    |
| tgm2      | 0.212 | -4.706 transglutaminase 2 (C polypeptide, protein-glutamine-gamma-glutamyltransferase) (TGM2), transcript variant 2, mRNA. |

|            |       |                                                                                                    |
|------------|-------|----------------------------------------------------------------------------------------------------|
| porcn      | 0.212 | -4.708 porcupine homolog ( <i>Drosophila</i> ) (PORCN), transcript variant C, mRNA.                |
| alcam      | 0.212 | -4.717 activated leukocyte cell adhesion molecule (ALCAM), mRNA.                                   |
| man2b2     | 0.212 | -4.722 mannosidase, alpha, class 2B, member 2 (MAN2B2), mRNA.                                      |
| kcnj6      | 0.211 | -4.729 potassium inwardly-rectifying channel, subfamily J, member 6 (KCNJ6), mRNA.                 |
| pcyox1     | 0.21  | -4.759 prenylcysteine oxidase 1 (PCYOX1), mRNA.                                                    |
| c14orf24   | 0.21  | -4.764 chromosome 14 open reading frame 24 (C14orf24), mRNA.                                       |
| nbpf10     | 0.21  | -4.772 PREDICTED: neuroblastoma breakpoint family, member 10, transcript variant 7 (NBPF10), mRNA. |
| glipr1     | 0.209 | -4.776 GLI pathogenesis-related 1 (glioma) (GLIPR1), mRNA.                                         |
| rabepk     | 0.209 | -4.785 Rab9 effector protein with kelch motifs (RABEPK), mRNA.                                     |
| col4a1     | 0.209 | -4.785 collagen, type IV, alpha 1 (COL4A1), mRNA.                                                  |
| zbed5      | 0.208 | -4.807 zinc finger, BED-type containing 5 (ZBED5), mRNA.                                           |
| rcp9       | 0.208 | -4.807 calcitonin gene-related peptide-receptor component protein (RCP9), mRNA.                    |
| fstl1      | 0.207 | -4.828 follistatin-like 1 (FSTL1), mRNA.                                                           |
| tnfsf7     | 0.205 | -4.868 tumor necrosis factor (ligand) superfamily, member 7 (TNFSF7), mRNA.                        |
| fyxd5      | 0.204 | -4.906 FXYD domain containing ion transport regulator 5 (FXYD5), transcript variant 2, mRNA.       |
| 4-Mar      | 0.201 | -4.969 membrane-associated ring finger (C3HC4) 4 (MARCH4), mRNA.                                   |
| c16orf53   | 0.201 | -4.97 chromosome 16 open reading frame 53 (C16orf53), mRNA.                                        |
| meg3       | 0.199 | -5.038 PREDICTED: maternally expressed 3, transcript variant 74 (MEG3), misc RNA.                  |
| acta2      | 0.196 | -5.105 actin, alpha 2, smooth muscle, aorta (ACTA2), mRNA.                                         |
| vtn        | 0.196 | -5.108 vitronectin (serum spreading factor, somatomedin B, complement S-protein) (VTN), mRNA.      |
| znf430     | 0.195 | -5.115 zinc finger protein 430 (ZNF430), mRNA.                                                     |
| thbs1      | 0.195 | -5.139 thrombospondin 1 (THBS1), mRNA.                                                             |
| cspg2      | 0.194 | -5.162 versican (VCAN), mRNA.                                                                      |
| hist1h1c   | 0.193 | -5.19 histone cluster 1, H1c (HIST1H1C), mRNA.                                                     |
| wsb1       | 0.192 | -5.205 WD repeat and SOCS box-containing 1 (WSB1), transcript variant 3, mRNA.                     |
| pebp1      | 0.192 | -5.222 phosphatidylethanolamine binding protein 1 (PEBP1), mRNA.                                   |
| spock      | 0.191 | -5.226 sparc/osteonectin, cwcv and kazal-like domains proteoglycan (testican) (SPOCK), mRNA.       |
| rbp1       | 0.191 | -5.24 retinol binding protein 1, cellular (RBP1), mRNA.                                            |
| loc613037  | 0.191 | -5.249 nuclear pore complex interacting protein pseudogene (LOC613037) on chromosome 16.           |
| flj46309   | 0.19  | -5.256 hypothetical protein LOC649598 (FLJ46309), mRNA.                                            |
| nop5/nop58 | 0.189 | -5.278 nucleolar protein NOP5/NOP58 (NOP5/NOP58), mRNA.                                            |
| ris1       | 0.185 | -5.394 Ras-induced senescence 1 (RIS1), mRNA.                                                      |
| loc441087  | 0.185 | -5.406 hypothetical gene supported by AK125735 (LOC441087), mRNA.                                  |
| loc645895  | 0.182 | -5.482 PREDICTED: hypothetical protein LOC645895 (LOC645895), mRNA.                                |
| vat1       | 0.182 | -5.507 vesicle amine transport protein 1 homolog ( <i>T californica</i> ) (VAT1), mRNA.            |
| c14orf85   | 0.181 | -5.534 chromosome 14 open reading frame 85 (C14orf85) on chromosome 14.                            |
| chp        | 0.178 | -5.606 calcium binding protein P22 (CHP), mRNA.                                                    |
| hs.371609  | 0.173 | -5.778 cDNA clone IMAGE:5261213                                                                    |
| c14orf4    | 0.173 | -5.78 chromosome 14 open reading frame 4 (C14orf4), mRNA.                                          |
| tagln      | 0.166 | -6.031 transgelin (TAGLN), transcript variant 1, mRNA.                                             |
| pofut1     | 0.165 | -6.055 protein O-fucosyltransferase 1 (POFUT1), transcript variant 2, mRNA.                        |
| htra1      | 0.161 | -6.205 HtrA serine peptidase 1 (HTRA1), mRNA.                                                      |

|          |       |        |                                                                                                                             |
|----------|-------|--------|-----------------------------------------------------------------------------------------------------------------------------|
| flj44124 | 0.157 | -6.383 | hypothetical protein LOC641737 (FLJ44124), mRNA.                                                                            |
| cryab    | 0.154 | -6.473 | crystallin, alpha B (CRYAB), mRNA.                                                                                          |
| psmd12   | 0.152 | -6.588 | proteasome (prosome, macropain) 26S subunit, non-ATPase, 12 (PSMD12), mRNA. XM_946055 XM_946058                             |
| gls      | 0.151 | -6.616 | glutaminase (GLS), mRNA.                                                                                                    |
| apoe     | 0.149 | -6.695 | apolipoprotein E (APOE), mRNA.                                                                                              |
| arl16    | 0.145 | -6.898 | PREDICTED: ADP-ribosylation factor-like 16 (ARL16), mRNA.                                                                   |
| cyp1b1   | 0.143 | -6.997 | cytochrome P450, family 1, subfamily B, polypeptide 1 (CYP1B1), mRNA.                                                       |
| hmox1    | 0.14  | -7.124 | heme oxygenase (decycling) 1 (HMOX1), mRNA.                                                                                 |
| c8orf45  | 0.135 | -7.408 | chromosome 8 open reading frame 45 (C8orf45), mRNA.                                                                         |
| nnmt     | 0.134 | -7.488 | nicotinamide N-methyltransferase (NNMT), mRNA.                                                                              |
| abca1    | 0.133 | -7.532 | ATP-binding cassette, sub-family A (ABC1), member 1 (ABCA1), mRNA.                                                          |
| igfl3    | 0.123 | -8.127 | IGF-like family member 3 (IGFL3), mRNA.                                                                                     |
| anpep    | 0.109 | -9.187 | alanyl (membrane) aminopeptidase (aminopeptidase N, aminopeptidase M, microsomal aminopeptidase, CD13, p150) (ANPEP), mRNA. |
